# Supplementary material for: Plasma Exosomal miRNAs in Persons with and without Alzheimer Disease: Altered Expression and Prospects for Biomarkers
Source: PLoS One. 2015 Oct 1;10(10):e0139233. doi: 10.1371/journal.pone.0139233 (PMC4591334; doi:10.1371/journal.pone.0139233)
Supplement: S1 Dataset — Also shown for each sequence are the sum across all samples, the AD group mean, control mean, AD/Control ratio, and p-values for each sequence (group AD vs. controls) by t-test (2-tailed, unpaired, unequal variance) and by Kruskal-Wallis test (i.e., nonparametric ANOVA). (XLSX) [file pone.0139233.s005.xlsx]

## Sheet: Sheet1
Seq ID	Seq	Length	# alignments	Sample	17	18	11	12	13	21	22	23	27	28	32	35	36	37	41	42	45	46	51	52	57	58	59	63	64	65	69	70	71	75	76	77	81	82	83	19	20	14	15	16	24	25	26	29	30
				Sex	F	F	M	M	M	M	F	M	F	M	F	F	F	F	F	F	F	F	F	F	M	M	M	M	M	M	M	M	F	F	M	M	M	M	F	M	M	F	F	M	F	M	M	F	F
	Group A = AD			Group	A	A	A	A	A	A	A	A	A	A	A	A	A	A	A	A	A	A	A	A	A	A	A	A	A	A	A	A	A	A	A	A	A	A	A	B	B	B	B	B	B	B	B	B	B
	Group B = Controls			Age at Draw Date	66	65	57	68	66	58	51	58	61	53	67	71	73	72	53	66	60	67	74	73	73	71	64	67	53	62	71	56	72	59	71	72	75	62	66	68	66	68	70	59	59	59	50	70	53
srna2485	TTTGGATTGAAGGGA	15	1	ath-miR159a:1-15(1)	67.5921	148.511	95.8567	561.864	402.947	7.07114	6.60415	10.455	8.16567	7.79604	52.2971	46.5355	25.1971	22.4527	3.10851	4.3846	46.0609	11.7053	27.9785	96.3083	28.5349	25.3052	23.7852	3.88396	0	2.14602	10.8337	10.422	3.21795	7.72823	7.66397	28.8756	26.5516	3.07952	3.8166	308.31	390.258	468.377	149.069	107.985	17.0079	28.8259	39.8844	6.4395	4.55979
srna14265	TTTGGATTGAAGGGAGTCTA	20	1	ath-miR159a:1-16(1)	0	0	0.543868	88.7154	7.17607	1.84742	1.49126	6.33636	1.36094	0.087596	10.7774	4.24982	4.40606	0.91214	1.02354	0.713772	28.3452	3.00994	12.6879	156.416	3.82427	18.7038	1.0455	4.90605	31.0669	5.4626	7.04189	5.55838	2.32408	7.01485	1.64921	0.27765	4.857	1.23181	0	0	0	6.1883	0	3.2661	0	15.7418	2.55074	0.411032	1.61492
srna10473	TTTGGATTGAAGGGAG	16	1	ath-miR159a:1-16(1)	18.3583	37.5645	17.6757	14.7859	60.8878	2.48446	3.83467	2.53454	4.08283	3.32865	7.95057	10.6246	8.9498	4.63086	1.06144	1.01967	99.2081	4.34769	4.87997	10.9286	0.294174	6.96809	4.96615	0.408837	0	0.390186	0.270842	0.347398	0.0893876	0.83227	5.5297	4.72005	0	1.23181	2.60223	48.2501	10.163	53.3741	21.2047	14.0851	6.28553	8.58645	9.73921	4.11032	4.36979
srna45500	TTTGGATTGAAGGGAGCCTA	20	1	ath-miR159a:1-17(1)	0	0	0	36.9648	5.21896	0	0	0	3.06213	0	14.4877	0	1.2392	0	0	0	0	0	2.27732	0	2.3534	12.1025	0	0.204419	0	1.56074	0	0	0	1.90233	0.388049	3.8871	8.095	2.05302	4.16357	15.5382	0	0	0	0	0.369737	0.817757	0	0	1.89991
srna7976	TTTGGATTGAAGGGAGC	17	1	ath-miR159a:1-17(1)	11.6826	46.3004	16.452	7.39295	121.123	2.86668	1.63328	0.950454	4.25295	2.36509	8.12724	14.2369	9.84478	10.4545	1.78171	1.22361	46.0609	2.34106	4.33775	1.36608	18.2388	31.5398	4.70477	6.95024	0	6.43806	0	3.12659	0.268163	0.237792	6.98489	0.27765	10.0378	0	0.520446	42.5255	40.6519	81.2215	39.8649	12.8603	8.68882	17.5818	10.4349	4.93238	3.13485
srna32154	TTTGGATTGAAGGGAGCT	18	1	ath-miR159a:1-18(1)	0	0.873592	0	0	10.6554	1.33778	0.426074	0	5.10354	4.2922	9.01064	0.637473	0.0688446	0.420988	0.0379087	0	7.08629	0.668875	11.7119	0.683038	10.2961	0.733483	9.40954	0	0	1.17056	4.06263	0.347398	0.268163	0.118896	8.34306	0.27765	0.9714	0	0.173482	0	0	6.1883	0.424095	0.204131	1.84868	5.92874	0.463772	3.8363	4.36979
srna13780	TTTGGATTGAAGGGAGCTTTA	21	1	ath-miR159a:1-18(1)	4.17235	0	0	0	9.13317	2.86668	2.05936	11.0886	0.340236	3.15346	8.12724	7.64968	1.65227	10.5247	0.796083	0	0	0	6.07286	50.5448	8.23689	0.366741	0	4.08837	0	6.43806	0	0	0	1.30785	15.425	9.16245	0	3.07952	2.77571	0	0	20.8855	0	0.204131	8.50395	8.79089	6.72469	1.78114	2.37489
srna6395	TTTGGATTGAAGGGAGCTCT	20	1	ath-miR159a:1-20(1)	8.76194	4.36796	2.17547	14.7859	19.1362	3.1852	4.40276	7.92045	13.7796	23.9137	17.8446	13.5994	7.29753	10.8053	0.985627	1.73345	21.2589	5.351	19.5199	63.5225	10.5903	12.8359	26.399	4.70163	3.88336	5.07241	4.33347	7.99016	4.55877	2.8535	45.3047	5.27535	8.4188	2.25832	3.46964	3.27119	4.06519	13.9237	8.4819	8.57351	6.10066	8.38201	12.0581	22.8808	31.0635
srna19443	TTTGGATTGAAGGGAGTTCTA	21	1	ath-miR159a:1-21(1)	0.83447	0	0.135967	0	8.69826	0.31852	2.05936	7.60363	6.29437	0.613172	12.8976	4.6748	2.20303	3.92922	0.341178	0	17.7157	2.34106	9.00084	44.3975	0	11.0022	10.7164	0.204419	0	2.34111	12.4587	0.347398	0.536326	8.91718	8.14903	0.27765	0.3238	0	0.173482	0	0	7.73538	1.06024	0	1.84868	3.67991	3.47829	2.05516	2.0899
srna43134	TTTGGATTGGAAGGGAGCTCTA	22	1	ath-miR159a:1-21(1)	0	0	0	0	2.60948	1.46519	1.84632	0	0	1.40154	0	0.212491	0	3.71872	0	0	0	0.334437	4.12087	0	0.294174	0	0	0.817675	0	0.780371	0	3.47398	0	0	0.970123	7.7742	0.9714	0	2.08178	0	0	1.16031	0	0	2.40329	1.43107	0	4.38434	5.79473
srna36685	TTTGGATTGAAGGGAGGTCTA	21	1	ath-miR159a:1-21(1)	0	0	0	0	0	0.31852	0	3.16818	0.340236	0.350384	3.00355	9.13711	2.06534	0	0	0	0	2.6755	5.85597	0.683038	7.64854	5.13438	0.784128	3.06628	0	0.390186	5.41683	7.29537	0.268163	0	0.291037	0	13.9234	0	0.173482	0	0	0	0	0	2.58816	6.13318	2.78263	0.959074	1.42493
srna18760	TTTGGATTGAAGGGAGGCTCTA	22	1	ath-miR159a:1-21(1)	12.5171	0	0	0	0.434913	0	0.852148	0	4.25295	0.262788	0	7.2247	2.96032	4.20988	0.0758174	0	0	4.34769	2.38577	45.7635	9.41358	19.4373	8.88679	3.06628	0	2.53621	2.43758	4.86358	0	1.30785	18.1413	2.2212	0	0	0	0	0	0	0	7.96112	1.10921	0	7.88412	1.2331	2.94486
srna16103	TTTGTATTGAAGGGAGCTCTA	21	1	ath-miR159a:1-21(1)	25.8686	20.0926	9.65366	36.9648	49.7975	0.127408	0.213037	0.950454	1.19083	1.75192	4.59366	1.91242	1.99649	1.75411	0	0	0	0	17.0257	51.2278	7.64854	11.369	24.0466	0	0	0	0	0	0	0	0.0970123	0	0	0	0	17.9916	18.2934	34.4224	14.6313	14.6974	0.184868	1.0222	1.15943	1.50712	3.32484
srna249	TTTGGATTGAAGGGAGCTCTA	21	1	ath-miR159a:1-21(1)	441.435	511.051	231.144	687.544	1065.32	134.67	168.157	275.948	503.039	856.514	704.597	504.666	274.621	356.155	53.5271	56.0821	822.01	167.553	760.083	2409.07	436.555	687.273	1158.16	328.296	166.984	179.876	199.34	324.123	177.434	177.749	1869.43	269.598	373.341	143.916	135.836	237.979	626.039	806.8	321.464	356.005	279.891	436.887	359.887	930.165	1257.46
srna7108	TTTGGCTTGAAGGGAGCTCTA	21	1	ath-miR159a:1-21(1)	6.67576	1.74718	2.71934	0	12.395	3.1852	4.40276	7.92045	11.7381	24.0013	11.3075	9.5621	4.40606	7.01646	0.568631	0.611804	17.7157	3.34437	0.216888	0	0	0	0.522752	22.8949	3.88336	13.0712	10.292	25.3601	13.8551	4.99362	48.9912	6.94125	7.7712	4.92724	3.12268	4.90679	10.163	6.96184	4.453	3.67436	7.39474	11.2442	13.6813	27.6761	36.0983
srna12356	TTTGGATTGAAGGGAGATCTA	21	1	ath-miR159a:1-21(1)	14.6032	0.873592	6.66238	0	9.56809	2.80298	0.284049	8.8709	3.91272	1.66432	8.83396	11.4745	4.61259	5.12201	0.341178	0	70.8629	7.69206	2.7111	27.3215	3.53009	1.10022	23.5238	3.47512	11.6501	4.87732	8.66694	7.29537	2.41347	2.37792	8.05202	8.05185	6.1522	0	1.56134	0	73.1734	0.386769	0	4.28675	3.69737	7.76869	6.4928	2.05516	3.70483
srna25090	TTTGGATTGCAGGGAGCTCTA	21	1	ath-miR159a:1-21(1)	9.17917	11.3567	4.62288	14.7859	20.006	2.42075	2.84049	3.80182	6.12425	12.4386	0	0	0	0.0701646	0	0.101967	0	0	0.108444	0.683038	0.294174	0	0	0	0	0	0	0	0	0	1.5522	0.27765	0.3238	0	0	1.6356	14.2282	10.8295	6.14938	6.5322	2.9579	6.74649	5.79715	15.3452	22.039
srna27240	TTTGGATTGAAGGGGAGCTCTA	22	1	ath-miR159a:1-21(1)	2.50341	0	0.543868	0	2.39202	1.14667	1.1362	2.85136	4.25295	5.43095	0.530038	0.212491	1.72112	0	0	0	0	0	10.8444	0	1.47087	8.06831	0	0	0	3.51167	0	2.77919	1.25143	1.42675	6.3058	9.4401	11.9806	0	0.173482	0	0	3.86769	0	0	0.184868	3.88435	0.463772	5.89146	5.98472
srna32235	TTGGATTGAAGGGAGCTCT	19	1	ath-miR159a:2-20(1)	2.08618	0	0.679835	0	3.26185	0.63704	0.994173	2.21773	1.8713	4.02942	1.41343	4.46231	1.30805	1.75411	0.151635	0.101967	7.08629	1.33775	5.09686	14.3438	3.23592	5.13438	12.5461	0.613256	0	0.195093	0.541683	0.347398	0.804488	0.475583	6.88787	0.5553	0.9714	1.23181	0.346964	0	2.03259	3.86769	1.90843	0.612393	0.184868	2.04439	0.231886	4.52135	4.36979
srna5198	TTGGATTGAAGGGAGCTCTA	20	1	ath-miR159a:2-21(1)	25.0341	24.4606	10.7414	14.7859	55.234	3.50372	4.75783	8.8709	12.5887	25.9284	18.3746	18.6992	7.84829	12.9804	0.947718	1.52951	21.2589	2.6755	27.9785	94.9422	16.4738	22.3712	59.8551	6.13256	7.76672	7.02334	4.06263	7.29537	3.21795	3.56687	43.2675	3.60945	6.476	5.13254	2.60223	11.4492	36.5867	40.6107	15.6915	19.5966	8.50395	14.9241	9.04355	27.2651	35.1483
srna16815	TGGATTGAAGGGAGCTCTA	19	1	ath-miR159a:3-21(1)	4.58959	4.36796	2.0395	0	13.0474	1.5926	1.7043	2.53454	3.7426	8.32162	5.65374	4.03733	1.99649	2.10494	0.416996	0.305902	7.08629	1.00331	8.13329	21.8572	5.58932	8.43505	9.67091	3.88396	0	1.36565	0.541683	1.38959	1.51959	1.42675	13.5817	2.7765	2.2666	0.205302	1.04089	5.72459	4.06519	9.66922	5.72528	4.69502	3.5125	3.88435	3.2464	10.8238	10.7345
srna28361	GGATTGAAGGGAGCTCTA	18	1	ath-miR159a:4-21(1)	7.92747	3.49437	3.53514	22.1789	14.1347	0.382224	0.710123	2.21773	1.70118	3.50384	2.47351	1.69993	0.826135	1.61379	0.379087	0.101967	7.08629	0.334437	5.09686	10.2456	2.64757	4.76764	7.31853	0.817675	3.88336	0.195093	1.35421	1.0422	0.715101	0.83227	6.98489	0.83295	0.3238	1.43711	0.173482	1.6356	2.03259	12.3766	3.39276	5.71567	2.40329	1.83995	0.927544	2.32918	4.55979
srna23987	TTTGGGATTGAAGGGAGCTCTA	22	1	ath-miR159a:4-21(1)	0	0	4.62288	0	6.95861	0.254816	0.92316	2.53454	1.02071	8.32162	0	19.5492	3.16685	0	0.644448	0.611804	0	0.334437	0	4.78126	0	0	0	1.83977	0	0.195093	0.541683	9.37976	1.07265	1.18896	15.813	6.38595	0	5.13254	0.173482	0	0	8.12215	5.72528	0	0	3.06659	1.39132	8.08363	6.4597
srna39221	TTTTGATTGAAGGGAGCTCTA	21	1	ath-miR159a:5-21(1)	0.417235	0	0.407901	0	2.17457	1.84742	1.42025	2.21773	4.08283	7.97124	3.53358	2.12491	0.963825	1.12263	0	0	0	0	1.08444	2.73215	0.588349	1.10022	1.56826	0.408837	0	0	0.270842	0	0.35755	0	0.388049	0	0	0	0	0	0	1.16031	0.424095	0.204131	2.21842	3.27103	2.08697	6.85053	13.1094
srna38732	TTGTATTGAAGGGAGCTCTA	20	1	ath-miR159a:6-21(1)	8.76194	11.3567	3.94304	22.1789	23.9202	0.191112	0.142025	0.316818	0.340236	2.01471	1.06008	1.27495	0.688446	0.91214	0.0379087	0	0	0	5.20531	11.6116	2.05922	3.66741	6.79578	0	0	0.195093	0	0	0	0	0	0	0	0	0	2.45339	14.2282	17.4046	7.42166	7.14459	0.369737	0.408878	0.231886	0.411032	1.32994
srna25466	CTATACAATCTACTGTCTTT	20	1	hsa-let-7a-3p:1-20(1)	0.83447	0.873592	0	0	0	0.828152	1.34923	2.53454	3.06213	2.36509	0.176679	4.03733	2.75378	0.210494	1.63007	2.54918	0	0	0	0	0	0	0	3.67954	38.8336	5.26751	3.79178	7.29537	2.59224	9.51166	3.49244	9.16245	0	0.205302	0.693928	0	0	12.7634	0	0	0.739474	0.408878	0.231886	1.50712	2.94486
srna4128	CTATACAATCTACTGTCTTTCT	22	1	hsa-let-7a-3p:1-21(1)	0	0	9.78962	0	4.34913	24.7809	17.8241	23.1277	5.95413	12.351	16.7845	20.3991	19.3453	7.64794	26.9531	12.7459	0	1.00331	0.108444	0	0	0	0	20.033	7.76672	8.1939	20.0423	53.8468	22.7938	18.3099	13.6787	17.4919	5.8284	12.3181	24.9814	0	0	0	4.66504	0.816525	30.1336	24.1238	13.9132	4.65836	8.73959
srna16563	CTATACAATCTACTGTCTTTC	21	1	hsa-let-7a-3p:1-21(1)	19.1928	17.4718	0	0	0	0.95556	2.41442	4.43545	0	1.40154	2.29683	6.37473	4.19952	9.1214	1.51635	2.54918	0	0	0	0	0	0	0	3.2707	0	0.975464	2.16673	8.68496	10.1902	7.49043	0.776098	2.49885	0	10.6757	5.20446	0	0	0	0.636142	0	1.10921	2.24883	1.6232	0.137011	0
srna35977	TATACAATCTACTGTCTTTCCT	22	1	hsa-let-7a-3p:2-21(1)	0	0	0	0	0	3.94965	2.41442	0	0.680472	1.92711	4.59366	0	1.51458	1.47346	2.53988	0.713772	0	0	0	0	0	0	0	2.24861	0	0	0	0	0.268163	0	0	0	9.3902	0	2.60223	0	0	0	0	0	2.9579	1.83995	3.47829	0	1.23494
srna19261	TGAGGTAGTAGGTTGTAAA	19	1	hsa-let-7a-5p:1-17(1)	0	0	0.271934	0	0	2.35705	6.95921	0.633636	0.680472	5.16816	0.353358	1.27495	13.9066	3.78889	1.59217	2.03935	0	0	0.216888	0	0	0	0	2.04419	0	0	4.60431	0	1.16204	0.118896	0	1.1106	1.2952	8.62267	11.9703	0	0	8.89569	0	0.612393	12.5711	3.67991	1.85509	1.50712	0.85496
srna31652	TGAGGTAGTAGGTTGTATAAAA	22	1	hsa-let-7a-5p:1-18(1)	0	0	0	0	2.17457	2.22964	4.18973	3.80182	4.76331	0	0	0	0.344223	2.59609	2.38825	0.611804	0	0	0	0	0	0	0	0	0	0.780371	0	1.0422	0.35755	0	0	0.27765	0	1.84771	7.11276	0	0	7.34861	0	3.67436	1.10921	2.65771	0.231886	1.50712	1.13995
srna11191	TGAGGTAGTAGGTTGTATAAA	21	1	hsa-let-7a-5p:1-18(1)	1.25171	9.60951	4.75884	0	0	4.45928	15.4807	2.85136	0	7.09528	18.5513	0.424982	6.47139	9.89321	4.3595	2.65115	0	1.33775	0	0	0	0	0	3.67954	0	1.56074	0	13.5485	7.2404	0.83227	3.9775	12.4942	10.3616	6.77495	7.98017	0	0	2.32061	0	1.22479	7.39474	13.0841	3.94206	0	3.32484
srna3458	TGAGGTAGTAGGTTGTAT	18	2	hsa-let-7a-5p:1-18(1);hsa-let-7c-5p:1-18(1)	6.67576	4.36796	18.8994	0	8.04589	14.7793	31.6715	16.1577	10.5473	16.9936	15.0177	31.8737	38.6218	23.7156	30.9335	22.5348	0	6.35431	0.975995	0	1.1767	0	1.30688	24.1214	3.88336	9.55955	9.47946	7.64277	21.3636	2.14012	2.42531	20.2684	13.2758	25.0468	39.0335	0.817798	0	1.54708	14.6313	9.59416	16.823	31.6881	28.7538	9.17971	12.3494
srna25556	TGAGGTAGTAGGTTGTATT	19	3	hsa-let-7a-5p:1-18(1);hsa-let-7c-5p:1-18(1);hsa-miR-98-5p:1-19(1)	0	0	0	0	0	5.66966	1.98835	1.26727	1.70118	0.262788	4.06362	4.46231	1.37689	2.59609	4.32159	2.65115	0	0	0	0	0	0	0	3.47512	0	0.585278	0	0	5.54203	0	0	11.9389	0	0	1.73482	0	0	0	0	0	4.25197	17.7862	0.463772	0	1.89991
srna11073	TGAGGTAGTAGGTTGTATAA	20	1	hsa-let-7a-5p:1-19(1)	6.67576	0.873592	0.135967	0	0	3.82224	10.1548	4.75227	6.63461	10.8619	6.53713	12.7495	9.84478	13.0506	7.43011	6.52591	0	0	0	0	0	11.369	1.30688	3.88396	0	1.36565	0	0.347398	3.75428	0.118896	0	7.49655	0	9.03327	12.3172	0	0	0.386769	8.26985	0	4.99145	5.7243	6.95658	4.11032	1.13995
srna342	TGAGGTAGTAGGTTGTATA	19	1	hsa-let-7a-5p:1-19(1)	127.674	79.4969	149.292	0	72.413	139.321	463.64	202.13	139.157	266.555	393.111	584.988	757.841	355.594	218.392	352.297	3.54315	23.4106	13.447	0.683038	1.76505	2.93393	16.7281	341.993	0	163.293	138.129	291.815	257.973	75.3799	70.722	297.363	234.755	625.143	529.467	2.45339	4.06519	110.229	108.78	82.2649	456.81	281.922	352.93	187.293	150.283
srna12362	TGAGGTAGTAGGTTGTATAGAA	22	1	hsa-let-7a-5p:1-20(1)	0	0	0	0	0	3.1215	13.7764	16.7914	0	6.30691	8.83396	0.212491	17.6242	6.17448	2.72943	5.20034	0	0	0	0	0	0	0	0	0	0	0	0.347398	4.46938	0	0.388049	4.9977	0	1.84771	5.03098	0	0	4.64123	0	0	5.91579	12.2664	17.1596	0.274021	7.78963
srna24386	TGAGGTAGTAGGTTGTATAGAAA	23	1	hsa-let-7a-5p:1-20(1)	0	0	0	0	0	1.14667	3.69264	5.06909	0	3.59144	2.47351	7.0122	2.47841	2.45576	1.06144	0.917707	0	0.334437	1.19288	0	0	0	0	0	0	0	0	0	4.02244	0	0	0	0	15.3976	2.08178	0	0	0	0	0	9.24342	4.08878	1.15943	2.46619	1.23494
srna30684	TGAGTTAGTAGGTTGTATAG	20	1	hsa-let-7a-5p:1-20(1)	10.8481	4.36796	10.8774	0	3.26185	1.14667	3.12454	0.316818	1.36094	0.87596	3.88694	4.88729	6.67793	5.40267	0	0	0	0	0.759107	0.683038	0	0.366741	0.261376	0	0	0	0	0	0.0893876	0	0	0	0	0.205302	0	4.90679	2.03259	3.86769	3.60481	4.08262	0.924342	1.22664	2.78263	0.411032	1.32994
srna46530	TGAGGTAGTAGGTTGTATAGTTTT	24	1	hsa-let-7a-5p:1-20(1)	0	0	0	0	0	3.94965	0.497086	0	0	1.92711	0.176679	0	3.64876	0	2.69152	3.05902	0	0.334437	0	0	0	0	0	0	0	0	0	0	0	0	0	0	0	0	0	0	0	0	0	0	0	0.204439	1.39132	0	0
srna1307	TGAGGTAGTAGGTTGTATAGA	21	1	hsa-let-7a-5p:1-20(1)	19.1928	21.8398	52.3473	0	12.8299	42.8091	118.378	57.344	26.8787	71.3907	70.8484	96.2584	142.302	77.4617	40.2591	50.066	0	0	6.61508	0	0	0	2.87514	62.5521	0	20.8749	40.8971	23.6231	62.6607	7.25264	10.2833	44.9793	21.6946	106.552	145.725	67.0594	0	22.0458	19.7204	36.7436	103.341	68.896	65.1599	24.9359	30.5886
srna33844	TGAGGTAGTAGGTTGTATAGG	21	1	hsa-let-7a-5p:1-20(1)	1.25171	0	0.815802	0	0.869826	0.700744	2.27239	0.316818	1.53106	0.963556	2.47351	1.48744	2.89147	1.61379	1.85753	1.52951	0	0.334437	0.325332	0	0.588349	0	0	4.70163	0	0.195093	1.08337	3.12659	0.983264	0.118896	0.388049	1.38825	3.238	2.05302	4.33705	0.817798	0	0.773538	0.424095	5.10328	1.29408	2.04439	0.463772	0.548042	0.759964
srna42310	TGAGGTAGTCGGTTGTATAG	20	1	hsa-let-7a-5p:1-20(1)	4.58959	5.24155	4.89481	0	1.30474	3.1215	8.59249	7.28681	2.04142	4.64259	0.176679	0	0.137689	0	0	0	0	0	0	0	0	0	0	0	0	0	0	0	0	0.118896	0.291037	0.5553	0	0.410603	0.346964	0.817798	4.06519	3.09415	2.96866	2.44957	7.76447	7.56425	8.34789	2.87722	3.03986
srna301	TGAGGTAGTAGGTTGTATAG	20	1	hsa-let-7a-5p:1-20(1)	247.42	90.8536	302.527	0	96.3332	180.665	565.116	299.076	181.856	341.362	480.567	668.709	801.558	448.211	379.807	531.76	10.6294	13.3775	8.78395	55.3261	15.0029	15.0364	18.2963	435.003	15.5334	125.445	114.837	256.033	274.152	73.3587	56.3641	214.901	199.785	521.877	404.56	143.115	119.923	175.593	115.778	147.587	362.527	409.901	416.235	182.772	246.038
srna1013	TGAGGTAGTAGGTTGTATAGTTT	23	1	hsa-let-7a-5p:1-20(1)	27.5375	1.74718	25.1539	0	8.26335	106.449	152.677	33.5827	26.7085	40.2942	51.0603	49.7229	70.1527	60.973	235.603	92.3825	0	37.457	0.108444	0	0	0	0	43.7456	0	21.6553	8.39609	26.4023	95.019	0.594479	8.24605	31.3744	17.1614	22.5832	62.974	1.6356	0	18.5649	6.36142	17.5553	75.4263	63.9895	40.3481	11.3719	23.7489
srna15823	TGAGGTAGTAGGTTGTCTAGT	21	1	hsa-let-7a-5p:1-21(1)	2.50341	0.873592	4.07901	0	2.60948	0.764448	2.05936	0.316818	0.850591	0.525576	0.353358	0.637473	0.550757	0.420988	0.0379087	0.101967	0	0	0	0	0	0	0	24.9391	0	6.82825	5.14599	7.64277	18.7714	0	0.0970123	0.27765	0	1.02651	0.86741	1.6356	0	1.54708	2.12047	2.85784	0.739474	1.22664	0.463772	0.959074	1.42493
srna10811	TGAGTTAGTAGGTTGTATAGT	21	1	hsa-let-7a-5p:1-21(1)	36.2995	12.2303	41.198	0	20.4409	3.94965	7.88237	2.21773	2.04142	3.06586	13.9577	14.6619	17.0735	13.1909	0.0379087	0.203935	0	0	1.84355	0	2.05922	0.366741	2.35238	0.408837	0	0	0	0	0.0893876	0	0	0	0	0	0	5.72459	2.03259	21.2723	21.6288	20.0049	7.025	4.90654	6.95658	1.78114	2.94486
srna22413	GTGAGGTAGTAGGTTGTATAGT	22	1	hsa-let-7a-5p:1-21(1)	0	0	1.49564	0	0	4.90521	5.04188	2.53454	0.680472	1.05115	0	0	4.13068	1.33313	5.15558	2.03935	0	0	0	0	0	0	0	0	0	0.195093	0	4.86358	2.77102	0	0	3.3318	0	2.66892	6.24535	0	0	0	2.12047	2.24544	3.88224	1.83995	2.08697	1.37011	1.13995
srna29287	TGAGGTCGTAGGTTGTATAGT	21	1	hsa-let-7a-5p:1-21(1)	0.83447	0.873592	1.35967	0	0.869826	6.75262	14.7706	7.28681	4.59319	6.04412	2.29683	1.27495	2.06534	1.54362	0.0379087	0	0	0	0	0	0	0	0	0.613256	0	0	0	0.347398	0.35755	0	0	0	0	0.410603	0.173482	0	0	0.773538	0	0.408262	7.025	8.58645	10.203	3.56228	5.79473
srna73	TGAGGTAGTAGGTTGTATAGT	21	1	hsa-let-7a-5p:1-21(1)	889.128	245.479	1203.44	0	627.58	1195.72	2926.84	1074.01	807.551	1135.77	2899.66	2728.81	3270.6	2612.58	1807.9	2072.08	35.4315	73.2418	83.9356	9.56253	111.198	61.6126	147.939	3294.41	31.0669	816.268	556.309	1319.42	2061.46	251.702	349.923	1385.2	949.705	2812.02	2851.7	279.687	89.4342	594.077	547.082	518.085	1726.86	1726.9	2180.65	840.971	1028.33
srna37492	TGAGGTAGTAGGTTGTATAGTG	22	1	hsa-let-7a-5p:1-21(1)	0	0	0.271934	0	0.217457	1.21038	2.69847	0	0.340236	0.788364	1.23675	1.91242	3.02916	2.94691	1.66798	1.32558	0	0	0	0	0.294174	0.366741	0	3.06628	0	0.975464	0.270842	2.08439	1.96653	0.237792	0.388049	1.1106	0	1.43711	2.25527	0	0	0.386769	0	0	2.03355	0.408878	0.463772	0.137011	0.664969
srna10203	TGAGGTAGTCGGTTGTATAGT	21	1	hsa-let-7a-5p:1-21(1)	13.7688	6.11514	21.6188	0	11.9601	20.8312	49.0695	19.0091	13.2692	14.9789	0	0.424982	0	0.0701646	0.151635	0.101967	0	0	0	0	0	0	0	0.204419	0	0	0	0	0	0.118896	0.388049	1.94355	0.9714	3.28483	2.42875	5.72459	6.09778	14.3105	11.2385	11.6355	36.604	24.7371	38.4931	13.5641	15.0093
srna6949	TGAGGTAGTAGGTTGTATAGTAA	23	1	hsa-let-7a-5p:1-21(1)	25.4513	18.3454	7.07028	0	2.82694	5.86077	21.9428	4.75227	2.38165	9.98594	6.18377	29.9612	15.8343	22.5228	3.44969	6.42395	0	0	0	0	0	0	0	12.0607	0	0.390186	0	0.694797	11.4416	0	1.5522	18.0472	8.7426	21.9673	14.9195	0	0	1.54708	4.87709	7.55285	21.075	22.6928	14.145	0.959074	4.93977
srna23105	TGAGGTAGTAGGTTGTATAGTTAT	24	1	hsa-let-7a-5p:1-21(1)	0	0	0	0	0	2.80298	3.19556	0	3.57248	0.700768	1.06008	0.637473	4.06183	1.47346	6.1033	4.79247	0	0	0	0	0	0	0	0.204419	0	0	0	0.347398	2.68163	0	0.970123	12.2166	0.6476	0.410603	0.86741	0	0	0	0.212047	0	2.77303	1.83995	0	0.137011	0.0949955
srna858	TGAGGTAGTAGGTTGTATAGTA	22	1	hsa-let-7a-5p:1-21(1)	59.2474	11.3567	44.0533	0	18.4838	55.9321	147.067	81.1054	31.1316	101.787	130.036	239.902	274.07	135.418	65.0893	72.9067	21.2589	4.34769	0.325332	0	15.8854	0	8.62541	150.248	0	47.2125	15.7088	96.9242	98.8627	12.603	21.1487	111.06	51.1604	170.811	270.112	0	0	26.6871	14.8433	22.6586	148.264	116.121	121.044	35.3487	46.7378
srna11097	TGAGGTAGTAGGTTGTATAGTTC	23	1	hsa-let-7a-5p:1-22(1)	17.9411	0	2.44741	0	0	3.88594	8.66351	0	0	2.36509	0.530038	0	4.13068	5.543	18.1583	22.5348	0	7.35762	0	0	1.47087	0	0	0	0	0.780371	0	5.90577	6.88285	0	2.61933	5.27535	6.1522	1.23181	9.19455	0	0	0	2.12047	0.204131	1.84868	0.817757	7.42035	3.01423	1.04495
srna6570	TGAGTTAGTAGGTTGTATAGTT	22	1	hsa-let-7a-5p:1-22(1)	48.8165	20.9662	60.7772	0	30.6614	10.9571	17.8241	4.11863	6.46449	7.62085	28.622	24.4365	27.5378	21.9615	0.0379087	0	0	0	2.81954	2.04911	0.882523	1.83371	2.35238	0	0	0	0	0	0.178775	0.118896	0	0	0	0.205302	0	13.0848	8.13038	22.0458	13.571	30.4155	9.24342	13.0841	9.27544	3.15124	5.69973
srna36035	TGAGGGAGTAGGTTGTATAGTT	22	1	hsa-let-7a-5p:1-22(1)	0.83447	0	0.543868	0	0	1.91112	3.19556	0.950454	0.680472	1.22634	3.35691	1.69993	2.27187	2.3856	1.78171	0.917707	0	0.668875	0	0	0	0	0	2.24861	0	0.585278	0.270842	1.38959	2.50285	0.118896	0.194025	2.2212	1.619	4.51664	3.8166	0.817798	0	0	0	0	2.21842	2.65771	1.6232	0.548042	0.949955
srna29545	TGAGGTAGTAGGCTGTATAGTT	22	1	hsa-let-7a-5p:1-22(1)	0.417235	0	0.815802	0	0.217457	1.46519	3.26657	0.633636	1.19083	1.13875	3.53358	6.16224	3.92414	3.08724	2.65361	2.54918	0	0.334437	0.108444	0	0.294174	0	0	1.63535	0	0.585278	0.270842	0.694797	0.893876	0.237792	0.291037	0.5553	0.9714	0.615905	2.08178	0	0	0.386769	0	0	1.10921	2.24883	3.01452	0	0.85496
srna38702	TGAGGTAGTAGGATGTATAGTT	22	1	hsa-let-7a-5p:1-22(1)	0	0	0.271934	0	0.217457	0.891856	2.41442	0	1.19083	0.788364	3.88694	4.24982	4.68143	3.43806	3.41178	2.44722	0	0.334437	0.216888	0	0	0	0	0.817675	0	0.195093	0.541683	0.347398	0.536326	0.118896	0.0970123	0.27765	0.6476	0	0.693928	0	2.03259	0.773538	0	0	0.554605	1.0222	0.927544	0.685053	0.379982
srna8275	TGAGGTAGTAGGTTGTCTAGTT	22	1	hsa-let-7a-5p:1-22(1)	7.51023	2.62078	5.57465	0	4.56659	1.27408	3.83467	0.316818	1.02071	1.31394	1.06008	0.424982	0.550757	0.491152	0	0.203935	0	0	0	0	0	0	0	37.4086	3.88336	13.0712	12.7296	17.7173	35.6657	0.118896	0.388049	1.6659	0	0.821207	1.04089	0.817798	4.06519	3.48092	2.96866	4.08262	1.10921	1.43107	2.55074	0.411032	2.46988
srna11074	TGAGGTAGTAGGTTGTATAGTTTA	24	1	hsa-let-7a-5p:1-22(1)	0.417235	0	8.56592	0	4.13167	9.5556	12.8532	8.8709	1.8713	3.41624	8.30392	18.0617	9.70709	6.24465	14.0262	18.0482	0	1.67219	0	0	0	0	0	0	0	0	0	0.347398	2.77102	0	0	0.27765	0	4.51664	0.693928	0	0	0	4.453	12.8603	17.0079	2.24883	5.10149	0	2.46988
srna36503	TGAGGTAGTGGGTTGTATAGTT	22	1	hsa-let-7a-5p:1-22(1)	0.83447	0	1.08774	0	0.869826	2.99409	3.90568	2.53454	1.8713	1.66432	1.76679	0.212491	1.2392	1.61379	2.57779	1.93738	0	0	0.108444	0	0.294174	0	0	2.65744	0	1.56074	0.270842	0.347398	2.1453	0	0.0970123	0.83295	0	1.23181	2.42875	0	0	0	0.84819	0.204131	1.84868	2.86215	2.31886	1.2331	2.27989
srna39987	TGAGGCAGTAGGTTGTATAGTT	22	1	hsa-let-7a-5p:1-22(1)	0	0	0.815802	0	0	2.16594	3.40859	1.26727	1.53106	1.40154	2.47351	1.91242	1.99649	1.54362	2.35034	1.63148	0	0	0	0	0	0	0.261376	3.47512	0	0.195093	0.270842	1.0422	1.69836	0	0.194025	0	0.3238	1.64241	1.56134	0	0	0	0	0.204131	2.21842	2.04439	3.71017	0.685053	0.949955
srna10260	TGAGGTAGTAGGTTGTATAGTTAA	24	1	hsa-let-7a-5p:1-22(1)	0	0	2.99127	0	0	5.28743	3.97669	7.92045	3.91272	6.30691	5.47706	14.2369	11.7036	7.01646	13.723	9.78887	0	0.334437	0	0	0	0	0	12.8784	0	0	0	5.21098	1.96653	0	2.13427	0	2.2666	11.7022	11.9703	0	0	0	5.72528	0	2.9579	6.33762	8.81166	2.05516	1.70992
srna39	TGAGGTAGTAGGTTGTATAGTT	22	1	hsa-let-7a-5p:1-22(1)	1538.76	460.383	1725.97	0	889.832	4187.14	6309.52	2085.3	1970.31	2640.49	6234.3	5590.21	5756.79	4796.31	6035.79	3991.21	141.726	200.662	109.745	71.0359	51.1864	34.8404	92.2658	5487.01	337.852	1429.64	887.007	2245.93	4204.35	412.331	598.857	2455.54	1550.68	3840.99	5562.7	471.052	308.954	761.161	473.926	735.689	3836.02	4146.85	3952.03	1263.79	2180.62
srna42405	TGAGGTAGTAGGTTGGATAGTT	22	1	hsa-let-7a-5p:1-22(1)	0	0	0	0	0.217457	0.063704	0.568099	0	0	0.087596	1.23675	0.424982	1.37689	1.26296	2.99479	2.34525	0	0	0	0	0	0	0	2.45302	0	1.36565	0.541683	3.12659	2.8604	0.118896	0.679086	1.1106	0.3238	3.28483	3.8166	0	0	0	0	0.204131	0	0.204439	0	0	0
srna4868	TGAGGTAGTCGGTTGTATAGTT	22	1	hsa-let-7a-5p:1-22(1)	25.8686	5.24155	35.8953	0	18.4838	64.5321	106.163	40.2359	31.1316	40.7321	0.530038	0.424982	0.688446	0.491152	0.568631	0.611804	0	0	0	0	0	0	0.261376	1.02209	0	0	0	0	0.178775	0.237792	0.291037	3.3318	0.9714	5.13254	5.03098	8.99578	10.163	18.1781	6.36142	13.2685	80.9724	63.5806	56.5802	20.2776	34.9584
srna26700	GTGAGGTAGTAGGTTGTATAGTT	23	1	hsa-let-7a-5p:1-22(1)	0	0	0	0	0	4.58669	2.20138	0	2.38165	1.05115	0.176679	4.03733	2.96032	1.26296	5.15558	5.81214	0	0	0	0	0	0	0	0	0	5.07241	0	0.347398	3.84367	0	0	0	0	0	0	0	0	0	0	0	9.42829	0.817757	1.39132	1.50712	1.42493
srna38375	TGAGGTAGTAGGGTGTATAGTT	22	1	hsa-let-7a-5p:1-22(1)	0	0	0.679835	0	0.217457	0.891856	2.62746	0.316818	1.19083	1.22634	4.06362	4.03733	4.06183	3.43806	1.51635	2.03935	0	0	0.216888	0	0	0	0	0.408837	0	0.195093	0	1.73699	0.446938	0	0.0970123	0.5553	0.3238	0	0.173482	0	0	0.773538	0.212047	0.204131	1.47895	1.63551	0.695658	0.411032	0.949955
srna428	TGAGGTAGTAGGTTGTATAGTTA	23	1	hsa-let-7a-5p:1-22(1)	236.99	13.1039	152.283	0	58.4958	205.955	329.355	188.823	104.623	203.048	384.631	387.371	432.757	264.941	215.473	166.105	7.08629	10.3676	2.49421	54.643	5.58932	0	20.3873	245.916	3.88336	78.2322	44.1472	103.525	251	22.1146	46.5659	201.019	101.673	253.137	486.791	53.1569	2.03259	42.5446	49.4071	40.8262	340.897	279.673	215.422	65.3541	115.325
srna43516	TGAGGAAGTAGGTTGTATAGTT	22	1	hsa-let-7a-5p:1-22(1)	0.417235	0	0.407901	0	0.65237	0.700744	1.84632	0.633636	0.170118	0.350384	2.29683	2.3374	2.34072	2.03477	2.50198	1.12164	0	0.334437	0	0	0	0	0	1.43093	0	0.195093	0.541683	0.347398	1.25143	0.356687	0.291037	1.6659	0.6476	2.46362	3.29616	0	0	0.773538	0.636142	0.408262	0.739474	0.613318	0.927544	0.137011	0.664969
srna35446	TGAGGTAGTAGGTTATATAGTT	22	1	hsa-let-7a-5p:1-22(1)	0.83447	0.873592	0.815802	0	0.434913	1.5926	0.497086	0.316818	0.680472	0.262788	1.41343	2.97487	3.09801	1.47346	0.833992	0.101967	0	0.334437	0	0	0	0	0	3.67954	3.88336	1.56074	0.270842	0.694797	3.21795	0	0.485062	2.7765	1.9428	1.43711	3.64312	0	2.03259	0.386769	0	0.816525	0	0.817757	0.695658	0.137011	0.189991
srna14629	TGAGGTCGTAGGTTGTATAGTT	22	1	hsa-let-7a-5p:1-22(1)	1.25171	0	1.76757	0	0.869826	20.0668	30.9614	8.23727	9.86685	14.5409	2.29683	1.48744	2.27187	2.03477	0.0758174	0	0	0	0.108444	0	0	0	0	0.204419	0	0	0	0	0.0893876	0	0.0970123	0.27765	0.3238	0.410603	0.346964	0	2.03259	1.16031	0.84819	0.816525	21.9993	19.0128	17.6233	5.75445	11.1145
srna44780	TGAGGTAGTAGGTTGTAAAGTT	22	1	hsa-let-7a-5p:1-22(1)	0.417235	0	0.135967	0	0.217457	1.14667	1.49126	0.633636	0.510354	0.87596	1.23675	2.54989	1.65227	0.91214	2.91897	2.75312	0	0	0	0	0	0	0	0.613256	0	0	0	0.347398	0.178775	0.118896	0.776098	1.94355	1.619	3.07952	2.94919	0	0	0	0	0.204131	1.29408	1.22664	1.15943	0.137011	0.664969
srna10599	TGAGGTAGTAGGTTGTATAGTTG	23	1	hsa-let-7a-5p:1-22(1)	0	0	10.7414	0	0	2.54816	12.7822	0.633636	2.21154	2.89067	4.06362	5.73726	6.3337	11.928	11.9033	7.44362	3.54315	2.6755	0	0	0	0	0	1.02209	0	4.48714	0	0.347398	2.41347	0	0	0	7.1236	11.7022	10.2354	0	0	0.386769	2.33252	0	9.42829	4.90654	3.01452	0	3.89482
srna43660	TGAGGTAGTAGGTTGCATAGTT	22	2	hsa-let-7a-5p:1-22(1);hsa-let-7d-5p:2-22(1)	0.417235	0	0.271934	0	0.434913	0.63704	2.98252	0.316818	0.510354	0.613172	1.76679	1.48744	1.2392	0.77181	1.70589	1.83541	0	0	0.108444	0	0	0	0	2.24861	0	0.390186	0.812525	1.38959	1.34081	0.356687	0.291037	1.1106	1.2952	0.615905	3.29616	0	0	0	0.212047	0.408262	1.47895	1.63551	2.31886	0.411032	0.379982
srna36218	GAGGTAGTAGGTTGTAT	17	2	hsa-let-7a-5p:2-18(1);hsa-let-7c-5p:2-18(1)	1.66894	0	1.35967	0	1.08728	1.33778	2.76948	0.633636	1.36094	1.31394	1.41343	4.24982	3.71761	2.59609	1.89544	2.54918	3.54315	0	0.108444	0	0	0	0.261376	1.83977	0	1.17056	0	1.73699	1.78775	0	0.291037	1.6659	0.6476	2.46362	3.12268	0	0	0.386769	1.06024	1.22479	1.29408	1.63551	2.78263	0.822064	1.23494
srna8738	GAGGTAGTAGGTTGTATA	18	1	hsa-let-7a-5p:2-19(1)	6.67576	4.36796	7.47818	0	4.56659	3.56742	13.5634	5.70272	3.40236	9.89835	16.2545	16.9993	20.2403	11.086	6.02749	8.25936	0	0.668875	0.542219	0	0	0.366741	1.30688	6.74582	0	4.09695	3.79178	4.51618	5.72081	1.18896	0.873111	4.72005	4.5332	12.1128	9.19455	0	0	7.34861	4.66504	4.28675	12.2013	7.15537	11.8262	5.06939	3.89482
srna5170	GAGGTAGTAGGTTGTATAG	19	1	hsa-let-7a-5p:2-20(1)	12.0998	4.36796	17.9476	0	5.87133	8.40893	24.7833	11.0886	6.46449	11.4751	22.4383	29.1113	30.3605	18.7339	16.2249	19.8836	0	0.668875	1.08444	3.41519	0.588349	1.10022	0.522752	15.5358	0	3.12149	4.87515	5.55838	7.86611	2.25902	2.13427	9.9954	6.476	18.4771	13.5316	7.36018	8.13038	6.96184	8.26985	7.75698	13.1257	13.2886	17.6233	7.94662	8.73959
srna46383	GAGGTAGTAGGTTGTATAGA	20	1	hsa-let-7a-5p:2-20(1)	0.417235	0.873592	1.90354	0	0.434913	0.828152	2.98252	1.58409	1.02071	1.31394	2.12015	2.3374	2.96032	1.54362	1.2889	1.22361	0	0	0.433775	0	0	0	0	0.408837	0	0	0.541683	0	1.25143	0.118896	0.0970123	0.83295	0.3238	1.84771	2.42875	4.90679	0	1.16031	0.636142	2.85784	3.14276	1.43107	1.39132	0.685053	0.759964
srna29337	GAGGTAGTAGGTTGTATAGTTT	22	1	hsa-let-7a-5p:2-20(1)	1.66894	0	1.35967	0	0	3.05779	3.83467	0.950454	1.02071	1.05115	1.76679	1.27495	1.92765	0.982304	7.27847	2.24328	0	0.668875	0	0	0	0	0	1.02209	0	0.585278	0	0	2.32408	0	0.194025	0.27765	0	0.205302	0.520446	0	0	0.386769	0.636142	0.204131	1.29408	0.817757	0.695658	0	0.569973
srna1688	GAGGTAGTAGGTTGTATAGT	20	1	hsa-let-7a-5p:2-21(1)	47.5648	20.0926	60.0974	0	24.79	35.6742	71.5804	28.5136	22.2855	29.0819	70.8484	65.0223	78.414	64.4813	52.2382	58.6313	3.54315	4.34769	2.7111	0	3.53009	1.46697	5.4889	72.1598	3.88336	16.3878	10.5628	28.1393	44.8726	4.16135	8.24605	26.6544	18.4566	53.9943	54.1264	17.1738	8.13038	37.1298	27.9903	27.1494	41.5954	49.2699	64.6962	21.5107	25.0788
srna27594	GAGGTAGTAGGTTGTATAGTA	21	1	hsa-let-7a-5p:2-21(1)	4.58959	0.873592	2.31144	0	1.5222	1.46519	4.18973	0.633636	0.850591	3.41624	3.35691	6.16224	5.0945	2.94691	1.70589	2.65115	0	0	0	0	0	0	0	2.86186	0	1.56074	0.270842	2.08439	1.69836	0.475583	0.388049	1.94355	0.6476	2.46362	4.51053	0	0	2.32061	0.84819	0.612393	3.88224	0.613318	3.47829	0.548042	1.32994
srna906	GAGGTAGTAGGTTGTATAGTT	21	1	hsa-let-7a-5p:2-22(1)	71.3472	29.7021	90.554	0	47.8404	112.119	159.139	61.1459	57.1597	71.3031	156.361	131.957	142.99	124.893	164.827	107.066	7.08629	11.0364	3.14487	11.6116	2.05922	0.733483	1.56826	112.635	7.76672	29.8492	21.9382	44.467	85.8121	8.20381	9.41019	50.2546	26.2278	74.3192	104.61	27.8051	22.3585	41.771	23.7493	37.7643	105.375	111.215	104.581	31.6495	53.2925
srna12904	GAGGTAGTAGGTTGTATAGTTA	22	1	hsa-let-7a-5p:2-22(1)	11.6826	0.873592	7.47818	0	3.04439	4.20446	7.95338	3.485	2.89201	3.76663	9.54068	7.0122	10.6709	6.31481	5.15558	4.0787	0	0	0	2.04911	0.588349	0	0.261376	4.70163	0	0.780371	1.35421	1.38959	4.37999	0.475583	0.970123	3.60945	1.619	3.07952	7.98017	4.90679	0	3.86769	1.90843	3.06197	7.94934	8.79089	7.18846	1.09608	3.41984
srna45044	AGGTAGTAGGTTGTATAG	18	1	hsa-let-7a-5p:3-20(1)	0.83447	0	3.94304	0	1.08728	0.445928	2.05936	0.950454	1.02071	0.87596	1.94347	2.76238	3.09801	1.26296	0.8719	1.01967	0	0	0	0.683038	0	0	0	1.02209	0	0.585278	0.270842	1.0422	0.446938	0	0	0.83295	0.3238	0.821207	1.21437	4.08899	0	2.32061	0.636142	1.02066	2.03355	0.817757	2.08697	1.50712	1.04495
srna16353	AGGTAGTAGGTTGTATAGT	19	1	hsa-let-7a-5p:3-21(1)	5.42406	0.873592	8.29399	0	5.0015	4.14076	6.10706	2.53454	1.36094	2.1899	8.4806	7.43719	7.50406	5.61317	2.23661	2.54918	0	0.334437	0.108444	0	0.294174	0	0	5.92814	0	2.53621	2.43758	3.12659	3.48612	0.356687	0.485062	1.38825	1.2952	5.13254	3.99009	1.6356	0	4.64123	3.60481	5.30741	5.17632	2.24883	4.40583	1.37011	2.1849
srna8284	AGGTAGTAGGTTGTATAGTT	20	1	hsa-let-7a-5p:3-22(1)	15.4377	5.24155	15.3643	0	7.39352	10.6386	16.8299	5.70272	4.93343	5.34336	17.6679	8.28715	12.3232	9.26173	7.92292	3.87476	0	0	0.216888	0.683038	0.294174	0	0	11.4474	0	3.12149	1.08337	3.47398	8.58121	0.356687	0.679086	4.9977	3.238	4.92724	7.45973	2.45339	0	5.80153	3.60481	5.9198	11.4618	10.6308	7.88412	3.01423	5.60474
srna36176	TGCGGTAGTAGGTTGTATA	19	1	hsa-let-7a-5p:4-19(1)	5.42406	2.62078	5.84658	0	2.17457	0.127408	0.497086	0	0.170118	0.087596	4.2403	8.28715	11.7036	5.26234	0	0	0	0	0.433775	0	0	0	0	0.408837	0	0.195093	0	0.347398	0.178775	0	0	0	0	0.205302	0	0	0	6.57507	2.12047	3.06197	0.554605	0.204439	0.695658	0.274021	0.284987
srna29214	GGTAGTAGGTTGTATA	16	1	hsa-let-7a-5p:4-19(1)	2.08618	3.49437	4.35094	0	2.39202	1.01926	3.05353	0.950454	1.19083	0.963556	2.82687	3.39986	3.51108	2.24527	2.04707	3.05902	0	0.334437	0.216888	0	0	0	0.784128	2.86186	0	1.75584	1.62505	1.38959	1.34081	0.356687	0.582074	3.60945	1.619	3.69543	3.99009	0	0	4.64123	2.54457	2.44957	2.58816	1.43107	2.55074	1.50712	0.569973
srna16364	TGCGGTAGTAGGTTGTATAG	20	1	hsa-let-7a-5p:4-20(1)	10.0136	6.11514	11.2853	0	3.04439	0.764448	2.34341	1.26727	0.850591	1.57673	12.1909	17.4243	18.2438	12.349	0.113726	0.101967	0	0	0	0	0	0.366741	0	1.02209	0	0	0.270842	0	0.536326	0	0	0	0	0	0.173482	2.45339	2.03259	7.34861	3.18071	5.71567	0.739474	2.45327	1.85509	0.548042	0.85496
srna18571	GGTAGTAGGTTGTATAG	17	1	hsa-let-7a-5p:4-20(1)	5.84129	5.24155	9.24576	0	2.82694	1.78371	5.46795	1.58409	1.36094	2.89067	4.06362	5.52477	5.92064	4.06955	4.70068	3.97673	0	0.668875	0.216888	0	0.294174	0.366741	0.522752	5.11047	0	1.36565	0.541683	0.347398	2.1453	0.356687	0.388049	1.94355	1.619	4.10603	3.64312	5.72459	2.03259	5.41477	2.75662	4.28675	3.5125	3.67991	4.8696	0.959074	2.56488
srna6280	GGTAGTAGGTTGTATAGT	18	1	hsa-let-7a-5p:4-21(1)	28.372	6.11514	29.9127	0	15.6569	6.3704	13.7764	7.60363	4.42307	5.16816	13.6043	12.962	14.9393	12.4893	12.9269	15.601	3.54315	1.67219	0.759107	0.683038	0.588349	0.733483	0	20.2375	0	6.43806	3.79178	6.94797	14.2126	0.951166	2.42531	8.60715	2.9142	14.3711	11.9703	4.08899	6.09778	13.5369	13.1469	11.6355	7.76447	9.19977	8.34789	3.8363	4.65478
srna6580	TGCGGTAGTAGGTTGTATAGT	21	1	hsa-let-7a-5p:4-21(1)	29.6237	6.98874	41.4699	0	17.1791	1.6563	4.18973	0.950454	1.36094	1.57673	35.1592	41.6482	44.8867	37.959	0.265361	0.305902	0	0	0.325332	0	0.588349	0	0	2.45302	0	0.780371	0.812525	1.38959	1.51959	0	0.0970123	0	0	0.410603	0	5.72459	2.03259	17.4046	16.1156	19.3925	2.21842	3.88435	4.40583	1.37011	1.32994
srna29380	GCGGTAGTAGGTTGTATAGT	20	1	hsa-let-7a-5p:4-21(1)	8.3447	2.62078	7.34222	0	2.39202	0.445928	0.568099	0.316818	0.680472	0.700768	8.65728	6.79971	9.22518	6.17448	0.151635	0	0	0	0.108444	0	0.294174	0	0	1.02209	0	0	0	0.347398	0.804488	0	0.0970123	0	0	0	0	2.45339	2.03259	2.70738	4.0289	4.49089	0.184868	0.613318	0.463772	0.548042	0.474978
srna3148	GGTAGTAGGTTGTATAGTT	19	1	hsa-let-7a-5p:4-22(1)	35.8822	10.4831	47.9963	0	24.79	21.5957	33.0207	14.5736	11.0577	14.103	31.6256	28.2613	26.7806	24.2068	40.297	29.5705	3.54315	2.6755	0.975995	0	1.1767	0.733483	0.261376	34.5468	7.76672	8.1939	4.87515	10.0746	21.6318	2.25902	2.81336	11.9389	7.7712	20.7355	33.482	13.0848	8.13038	18.9517	10.6024	17.9635	20.5204	19.0128	18.5509	6.71352	13.4894
srna3354	TGCGGTAGTAGGTTGTATAGTT	22	1	hsa-let-7a-5p:4-22(1)	50.4855	10.4831	52.6192	0	27.3995	6.3704	9.65768	2.85136	2.89201	4.4674	83.0392	83.2965	81.3055	70.4452	0.454905	0.305902	0	0	0.216888	0	0.294174	0	0	5.11047	0	1.17056	1.08337	1.73699	4.46938	0	0.0970123	0.27765	0	0	0.346964	15.5382	14.2282	21.2723	16.3277	29.599	4.06711	4.90654	6.72469	2.05516	4.1798
srna45858	GGTAGTAGGTTGTATAGTTA	20	1	hsa-let-7a-5p:4-22(1)	5.84129	0	3.94304	0	1.95711	0.95556	0.92316	0	0.510354	0.87596	3.18023	2.54989	2.40956	1.1928	1.66798	0.611804	0	0	0	1.36608	0	0	0	0.817675	0	0.780371	0	0.694797	0.804488	0.237792	0.291037	0.83295	0.9714	0.205302	1.9083	0	0	0.773538	1.06024	1.83718	2.77303	1.0222	1.15943	0.411032	0.949955
srna37597	GGGGTAGTAGGTTGTATAGTT	21	1	hsa-let-7a-5p:4-22(1)	2.50341	0.873592	4.62288	0	2.17457	0.509632	1.56227	0	0.340236	0.350384	3.18023	4.03733	3.8553	3.22757	0.189544	0	0	0	0.108444	0	0	0	0	3.06628	0	0.975464	0	0.694797	3.48612	0	0	0.27765	0	0	0	0.817798	0	1.16031	0.84819	1.83718	0.924342	0.204439	1.39132	0.137011	0.284987
srna15064	GCGGTAGTAGGTTGTATAGTT	21	1	hsa-let-7a-5p:4-22(1)	10.8481	1.74718	15.2283	0	6.74115	1.84742	1.27822	0.633636	0.850591	0.87596	14.8411	15.9368	15.077	12.9804	0.379087	0.305902	0	0	0.108444	0	0	0	0	1.83977	0	0.195093	0	0.347398	1.16204	0	0	0	0	0	0.173482	2.45339	4.06519	6.1883	3.81685	6.12393	0.554605	2.04439	2.08697	0.411032	1.13995
srna24071	TGGGGTAGTAGGTTGTATAGTT	22	1	hsa-let-7a-5p:4-22(1)	6.25853	0.873592	0.679835	0	0	1.84742	2.69847	0.633636	1.19083	0.700768	3.18023	2.54989	3.2357	1.96461	1.66798	1.01967	0	0	0.325332	0.683038	0	0	0.261376	8.99442	0	1.17056	2.16673	2.77919	6.16774	0.118896	0.194025	1.1106	0.9714	1.84771	1.9083	0	0	0	0	0.408262	1.47895	2.24883	1.15943	0.411032	0.189991
srna34507	GTAGTAGGTTGTATAG	16	1	hsa-let-7a-5p:5-20(1)	2.50341	1.74718	6.79835	0	2.60948	0.95556	2.27239	1.58409	0.680472	1.75192	3.71026	1.69993	3.71761	2.80658	1.25099	1.01967	0	0	0.216888	0	0	0	0	1.83977	0	0.975464	0.541683	0.347398	1.25143	0.118896	0.0970123	0.83295	0.6476	2.05302	1.56134	4.90679	0	4.25446	1.69638	3.47023	1.29408	1.63551	1.6232	0.685053	0.664969
srna39344	TGATGTAGTAGGTTGTATAG	20	1	hsa-let-7a-5p:5-20(1)	0.417235	0	0.271934	0	0	2.67557	6.60415	2.53454	2.38165	4.81778	2.47351	2.76238	4.13068	2.1751	0	0	0	0	0	0.683038	0	0	0	0.204419	0	0	0	0	0.35755	0.118896	0	0	0	0.205302	0	0	0	1.16031	0	0.204131	5.54605	4.7021	5.10149	1.50712	4.36979
srna16612	GTAGTAGGTTGTATAGT	17	1	hsa-let-7a-5p:5-21(1)	11.6826	4.36796	18.7634	0	7.82844	2.16594	5.32593	1.90091	1.53106	1.75192	6.36045	6.79971	7.50406	6.24465	2.53988	2.34525	0	0.334437	0.108444	0	0.588349	0	0.261376	5.51931	0	0.585278	1.08337	1.38959	3.30734	0.713375	0.582074	1.6659	0.6476	3.90073	3.8166	4.08899	6.09778	8.12215	8.4819	7.75698	2.40329	3.06659	3.2464	0.959074	1.51993
srna36814	GATGTAGTAGGTTGTATAGT	20	1	hsa-let-7a-5p:5-21(1)	0	0	0.815802	0	0.434913	3.94965	7.66933	2.21773	3.23224	4.02942	2.12015	3.39986	2.40956	2.59609	0	0	0	0	0	0	0	0	0	0.408837	0	0	0.270842	1.0422	0.268163	0	0.0970123	0	0	0.205302	0.173482	0	2.03259	0	0.84819	0	6.65526	4.49766	7.65223	2.32918	3.51483
srna12444	TGATGTAGTAGGTTGTATAGT	21	1	hsa-let-7a-5p:5-21(1)	0.83447	0	0.951769	0	0.434913	13.3141	31.3875	9.18772	10.8876	10.9495	8.65728	7.2247	7.43522	6.59547	0.0379087	0	0	0	0.108444	0	0.294174	0	0	3.47512	0	0.585278	0.541683	1.0422	1.25143	0.118896	0.0970123	0	0	0.205302	0.346964	0	0	0.386769	0.636142	0.612393	14.9743	19.4217	19.7103	9.45373	11.4945
srna8794	GTAGTAGGTTGTATAGTT	18	1	hsa-let-7a-5p:5-22(1)	24.1996	7.86233	22.5705	0	13.9172	7.38966	11.291	6.01954	3.40236	4.2922	14.6644	10.837	11.6347	11.3667	7.99874	5.09837	0	0.334437	0.325332	0	0	0.366741	0.261376	8.79	0	2.92639	0	3.47398	6.5253	0.356687	1.35817	3.60945	3.238	5.95375	9.19455	7.36018	2.03259	11.2163	6.99757	11.0231	7.57961	4.49766	6.72469	2.05516	3.22985
srna19238	GATGTAGTAGGTTGTATAGTT	21	1	hsa-let-7a-5p:5-22(1)	0.83447	0	0.135967	0	0.434913	12.9319	20.2385	6.96999	5.44378	8.32162	2.82687	6.37473	3.99299	4.28004	0.113726	0.101967	0	0	0.108444	0	0	0	0	1.43093	0	0	0	0.694797	1.16204	0	0	0.27765	0	0	0	0	0	0.386769	0	0	9.9829	12.6752	10.8986	3.97331	6.74468
srna6068	TGATGTAGTAGGTTGTATAGTT	22	1	hsa-let-7a-5p:5-22(1)	0	0	0.815802	0	0.65237	39.4328	64.9053	19.3259	19.2233	25.0525	19.0814	18.0617	13.9755	13.8926	0.189544	0.101967	0	0	0.325332	0.683038	0	0.366741	0	2.86186	0	0.975464	0.541683	2.77919	2.23469	0	0.0970123	0.27765	0	0.205302	0.693928	0.817798	0	0.773538	0	0.612393	39.9316	40.479	36.638	11.6459	24.6988
srna18435	GAGTTAGTAGGTTGTATAGT	20	1	hsa-let-7a-5p:6-21(1)	18.7756	4.36796	23.2504	0	11.5252	1.5926	5.39694	2.53454	1.36094	2.36509	10.0707	7.64968	11.084	8.41975	0.189544	0.40787	0	0	0.542219	0	0	0.733483	1.56826	0	0	0	0	0	0.178775	0	0	0	0	0	0	3.27119	2.03259	11.6031	9.75418	10.0024	2.77303	1.43107	2.55074	0.959074	1.32994
srna31623	TAGTAGGTTGTATAGTT	17	1	hsa-let-7a-5p:6-22(1)	8.3447	5.24155	11.8291	0	5.0015	1.78371	1.91733	0.950454	0.850591	0.963556	3.71026	2.76238	3.71761	1.89444	1.06144	2.03935	3.54315	0	0	0	0	0	0	2.24861	0	0	0	1.0422	0.893876	0.118896	0.0970123	0.27765	0.3238	0.615905	0.520446	3.27119	2.03259	5.41477	3.60481	3.06197	1.47895	1.63551	1.15943	0.274021	0.569973
srna11511	GAGTTAGTAGGTTGTATAGTT	21	1	hsa-let-7a-5p:6-22(1)	23.7824	6.11514	31.5443	0	13.9172	7.07114	9.01857	1.58409	3.40236	4.2922	17.3146	16.7868	15.2147	11.7175	0.644448	0.509837	0	0	0.216888	0	0	0	1.0455	0	0	0.195093	0	0	0.178775	0	0	0	0	0	0	12.267	12.1956	11.9898	8.69394	12.6561	5.17632	7.15537	5.10149	1.2331	4.08481
srna28264	AGTAGGTTGTATAGT	15	1	hsa-let-7a-5p:7-21(1)	17.5239	6.11514	19.7152	0	10.8728	0.700744	1.06519	0	0.510354	0.43798	3.35691	2.12491	3.71761	3.43806	0.454905	0.509837	0	0.334437	0	0	0	0	0.522752	1.83977	0	0.195093	0.541683	1.0422	0.625713	0	0.194025	0	0	0.410603	0.520446	4.08899	2.03259	12.3766	11.0265	9.39003	0.369737	0.817757	0.927544	0.274021	0.474978
srna15980	AGTAGGTTGTATAGTT	16	1	hsa-let-7a-5p:7-22(1)	29.2065	6.98874	29.3689	0	13.9172	1.91112	3.33758	0.633636	1.53106	1.31394	6.36045	8.49964	7.91713	5.40267	1.66798	1.01967	0	0.668875	0.216888	0.683038	0	0	0	2.65744	0	1.17056	0.270842	1.0422	1.4302	0.356687	0.0970123	0.5553	0.6476	0.410603	0.86741	10.6314	6.09778	17.0178	9.75418	13.0644	2.40329	1.0222	3.2464	0.685053	0.284987
srna14094	GTAGGTTGTATAGTT	15	1	hsa-let-7a-5p:8-22(1)	35.0478	12.2303	35.3514	0	14.787	2.03853	3.4796	1.90091	2.89201	1.83952	7.42053	9.5621	7.02215	6.80596	1.78171	0.815739	0	1.00331	0.542219	0	0	0	0.522752	1.83977	0	0.390186	0.541683	2.43179	4.55877	0.594479	0.194025	1.38825	0.3238	0.821207	1.21437	8.99578	4.06519	17.4046	10.3903	15.7181	2.03355	2.24883	3.2464	0.685053	1.23494
srna28020	CTATACAACCTACTGCCTTC	20	1	hsa-let-7b-3p:1-20(1)	0	0	0	0	0	0.63704	2.41442	0	4.42307	5.25576	1.59011	0	4.68143	1.54362	1.3268	1.63148	0	0	0.216888	0	0	0	0	5.11047	0	0.390186	1.08337	2.77919	1.96653	9.86835	0.970123	0.27765	0	0.410603	6.7658	0	2.03259	0	5.51323	0	2.03355	0	0	2.6032	3.51483
srna29604	CTATACAACCTACTGCCTTCT	21	1	hsa-let-7b-3p:1-20(1)	0	0	0	0	0	1.21038	2.69847	2.85136	0	3.50384	2.47351	0	1.65227	2.87675	2.1608	2.34525	0	0	0	0	6.47184	0	0	5.92814	0	0	7.04189	1.73699	1.69836	0	1.74622	3.05415	0	0	5.20446	0	0	0	0	0	1.29408	2.45327	6.95658	0	0.949955
srna7906	CTATACAACCTACTGCCTTCC	21	1	hsa-let-7b-3p:1-21(1)	0	55.0363	4.62288	0	0	4.7141	8.16642	12.0391	3.23224	13.227	28.7987	3.39986	14.2508	12.4893	3.98041	3.77279	0	0.334437	3.90398	0	0	0	0.261376	8.58559	0	5.4626	6.5002	13.2011	7.86611	1.18896	7.76098	15.5484	6.1522	4.10603	16.8278	26.1695	24.3911	0	5.30119	7.55285	29.9487	13.6974	6.4928	8.08363	6.3647
srna8384	CTATACAACCTACTGCCTTCCT	22	1	hsa-let-7b-3p:1-21(1)	0	0	3.53514	0	0	9.87412	7.74034	3.16818	7.99555	9.72316	14.1343	15.9368	8.60558	5.7535	4.32159	6.52591	0	0.334437	0	0	2.64757	0	6.5344	16.3535	0	1.95093	25.73	13.2011	5.09509	5.23141	4.17153	0.27765	19.7518	10.881	40.5948	2.45339	50.8149	0	0.212047	0	16.2684	29.0304	5.33338	9.86476	1.70992
srna1641	TGAGGTAGTAGGTTG	15	3	hsa-let-7b-5p:1-15(1);hsa-let-7a-5p:1-15(1);hsa-let-7c-5p:1-15(1)	13.3515	48.0476	34.3996	0	14.3521	47.9054	63.9821	73.1849	21.9452	102.487	37.986	49.0854	50.6696	38.9413	43.9362	52.6152	0	15.3841	1.30133	0	8.53106	4.4009	6.5344	49.0605	0	18.3387	26.0008	18.7595	38.4367	11.2951	6.49982	20.5461	2.5904	34.696	52.912	22.8983	0	22.8194	8.4819	33.2734	90.0309	54.1764	76.7542	36.7188	43.223
srna3440	TGAGGTAGTAGGTTGT	16	3	hsa-let-7b-5p:1-16(1);hsa-let-7a-5p:1-16(1);hsa-let-7c-5p:1-16(1)	13.3515	13.9775	13.4607	0	18.0489	15.4164	20.8776	38.335	22.7958	21.5486	81.9792	26.7739	24.7152	17.892	10.2354	17.7423	0	4.34769	4.55464	0	8.23689	1.46697	2.61376	23.3037	3.88336	7.21843	4.87515	27.7919	26.7269	3.80466	1.06714	13.8825	2.2666	18.2718	18.9095	21.2627	20.3259	7.34861	11.0265	10.0024	33.2763	25.5549	44.0583	6.98754	12.9194
srna2530	TGAGGTAGTAGGTTGTG	17	1	hsa-let-7b-5p:1-17(1)	68.8438	27.9549	62.8168	0	68.0639	28.4757	42.8204	35.4836	15.1405	47.6522	54.7706	38.6734	33.8027	24.4874	15.2393	24.0643	0	3.34437	5.53064	0	0.294174	30.8063	12.5461	45.9942	0	24.3866	30.0634	29.8763	20.0228	3.32908	10.0893	7.49655	25.5802	20.1196	19.9504	33.5297	50.8149	64.2036	34.7758	24.2916	46.9566	56.2208	54.0294	31.7865	44.1729
srna18208	TGAGGTAGTAGGTTGTGT	18	1	hsa-let-7b-5p:1-18(1)	0.83447	0	3.26321	0	0	3.69483	5.752	8.8709	0	3.50384	4.41698	3.18737	8.3302	2.52593	4.92813	2.75312	0	0	0	0	0	0	0.261376	1.43093	0	0.780371	0.270842	1.73699	1.25143	0.713375	0	2.2212	0	0	0.520446	0	0	4.25446	0	0.204131	5.54605	9.4042	6.72469	1.2331	2.37489
srna42317	TGAGGTAGTAGGTTGTGTAGTT	22	2	hsa-let-7b-5p:1-18(1);hsa-let-7a-5p:1-22(1)	0	0	0.135967	0	0	1.78371	2.20138	2.53454	1.36094	1.22634	0.176679	0.424982	0.688446	0.491152	0.379087	0.611804	0	0	0.108444	0	0	0	0	7.15466	0	1.56074	0.270842	1.38959	2.8604	0.118896	0.291037	1.94355	0.6476	1.64241	2.25527	0	0	0	0	0	1.29408	2.04439	0.927544	0.274021	0.85496
srna16278	TGAGGTAGTAGGTTGTGTGAAA	22	1	hsa-let-7b-5p:1-19(1)	0	0	8.83785	0	0	1.91112	7.52731	2.85136	3.06213	3.15346	6.18377	4.88729	10.3267	4.77119	0.909809	2.54918	0	0	0	0	0	1.10022	0	4.90605	0	3.51167	5.14599	0.347398	2.32408	0.118896	0	8.60715	0	9.85448	10.5824	0	0	0	0	2.04131	6.28553	3.67991	6.72469	2.05516	2.37489
srna11498	TGAGGTAGTAGGTTGTGTGA	20	1	hsa-let-7b-5p:1-19(1)	0	0	2.99127	0	3.91422	7.963	9.37363	16.7914	0	5.43095	8.4806	22.524	15.49	4.42037	4.32159	2.14132	0	0	0	0	0	0.366741	0	5.11047	0	0.195093	0.270842	1.0422	5.36326	3.44798	0	1.1106	0	7.39086	6.93928	0	0	3.86769	0	10.0024	11.4618	10.222	16.232	1.64413	3.89482
srna13113	TGAGGTAGTAGGTTGTGTG	19	1	hsa-let-7b-5p:1-19(1)	0.83447	0	9.51769	0	0.65237	6.94374	10.6519	6.65318	2.55177	2.45269	11.3075	5.73726	12.0478	5.26234	8.15037	1.22361	0	0	0.108444	0	0	0.733483	0	1.02209	0	0.780371	0	6.25317	1.60898	1.07006	0.485062	16.3813	0.3238	1.64241	7.28624	0	0	1.54708	2.75662	1.42892	13.1257	1.83995	4.40583	1.37011	5.41474
srna17211	TGAGGTAGTAGGTTGTGTGAA	21	1	hsa-let-7b-5p:1-19(1)	0	0	5.71061	0	0.65237	3.69483	5.89402	8.8709	4.08283	3.76663	3.35691	7.64968	9.5694	7.78827	5.6484	4.28263	0	0	0	0	0	0	0	4.29279	0	1.75584	3.79178	0.347398	1.34081	0.475583	0	5.83065	0	12.934	4.8575	0	0	0.386769	8.26985	6.94046	10.7224	1.83995	10.6668	1.37011	4.1798
srna15893	TGAGGTAGTAGGTTGTGTGGA	21	1	hsa-let-7b-5p:1-20(1)	0	0	0	0	0	5.66966	12.2141	2.21773	2.04142	5.86893	7.77389	7.2247	5.23219	13.9628	3.26015	0.611804	0	0	0.216888	0	0.294174	0.733483	0	0.204419	0	1.17056	0.270842	0	0.0893876	0	0.388049	0	0	2.87422	3.99009	0	0	0	6.78552	0.204131	15.5289	1.22664	6.26092	5.34341	2.0899
srna14892	TGAGGTAGTAGGTTGTGTGGTTATT	25	1	hsa-let-7b-5p:1-20(1)	20.8618	0	0	0	0	12.3586	12.0721	4.43545	0	1.92711	0.883396	8.49964	4.61259	3.22757	12.0171	2.14132	0	0	0	0	0	0	0	0	0	0	0	0	7.68733	3.80466	0	0	0	4.31133	0.173482	0	0	0	0	0	3.14276	10.4264	8.11601	2.6032	0
srna1090	TGAGGTAGTAGGTTGTGTGG	20	1	hsa-let-7b-5p:1-20(1)	35.465	13.9775	73.966	0	43.2739	72.1766	156.156	110.569	41.3387	93.2897	124.736	78.1967	87.9146	142.364	72.1782	67.0945	3.54315	3.34437	14.0977	0	0.882523	16.5034	2.35238	70.5245	11.6501	27.8983	20.584	31.2659	42.0122	21.9957	22.6039	53.3088	27.8468	56.2526	70.4337	11.4492	18.2934	73.0993	59.3733	89.2053	122.568	101.811	137.74	78.5071	104.59
srna19774	TGAGGTAGTAGGTTGTGTGGAAA	23	1	hsa-let-7b-5p:1-20(1)	0.417235	0	8.29399	0	0	4.20446	7.81136	2.85136	0.340236	1.75192	0	3.18737	2.27187	6.17448	0.265361	1.52951	0	0	0	0	0	0	0	0	31.0669	0	0	10.7694	3.48612	0.118896	1.06714	7.2189	0	0	2.60223	0	0	22.0458	0	0	9.05855	3.88435	9.97109	5.34341	3.70483
srna12492	TGAGGTAGTAGGTTGTGTGGAA	22	1	hsa-let-7b-5p:1-20(1)	0	0	1.08774	0	0	8.72745	11.575	5.70272	2.89201	9.37277	6.18377	11.8995	9.5694	5.19218	1.09935	1.63148	0	0	7.1573	0	0	10.2688	0	8.99442	0	0.585278	9.47946	0	3.84367	0	3.9775	5.27535	6.1522	0	2.25527	10.6314	0	6.1883	0	18.3718	6.65526	11.0397	6.72469	6.30249	12.4444
srna43789	TGAGGTAGTAGGTTGTGTGGTTTTT	25	1	hsa-let-7b-5p:1-20(1)	0	0	0	0	0	4.90521	1.06519	0	0.340236	0.350384	0	0	1.58343	0.982304	5.04186	1.32558	0	0	0	0	0	0	0	0	0	0	0	0	1.78775	4.75583	0	0	0	0	0	0	0	0	0	0	1.47895	2.86215	2.31886	0	0
srna1502	TGAGGTAGTAGGTTGTGTGGTTT	23	1	hsa-let-7b-5p:1-20(1)	20.0273	20.0926	20.531	0	3.4793	112.82	116.744	35.8004	4.42307	41.6957	32.6857	26.9864	27.8132	62.7271	120.209	29.4686	3.54315	2.00662	2.92798	0	0.294174	0.366741	0	7.15466	0	9.75464	12.7296	8.68496	47.733	12.0085	8.34306	11.9389	22.0184	29.5634	49.9628	0	0	12.7634	1.27228	2.24544	63.7796	35.9813	28.7538	15.2082	25.6488
srna8424	TGAGGTAGTAGGTTGTGTGGTTTT	24	1	hsa-let-7b-5p:1-20(1)	0	0	9.92559	0	0	28.5394	19.1023	0.316818	0	3.85422	1.59011	5.09978	7.77944	6.80596	24.6028	6.52591	0	0	0	0	0	0	0	0	0	0	0	0	6.88285	0.237792	4.94763	0	0	0.205302	5.72491	0	0	0	0	4.69502	8.50395	12.6752	1.85509	0	3.51483
srna43207	TGAGGTAGTAGGTTGTGTGGTAAG	24	1	hsa-let-7b-5p:1-21(1)	0	0	0	0	0	1.97482	4.47378	0	0.170118	1.22634	0	0	3.37339	1.54362	0.0379087	1.01967	0	0	0	0	0	0	0	0	0	0	0	0	1.78775	0.237792	0	0	0	0	0.520446	0	0	3.09415	0.212047	0	1.10921	2.86215	0.231886	0	3.70483
srna46675	TGAGGTAGTAGGTTGTGTGGTTAGT	25	1	hsa-let-7b-5p:1-21(1)	0	0	9.92559	0	0	2.22964	0.568099	2.21773	0	0	0	0	3.2357	1.82428	3.37388	0.40787	0	0	0	0	5.29514	0	0	0	0	0	0	0	1.78775	1.30785	0.873111	0	0	0	0	0	0	0	0	0	0	0	3.71017	0	0
srna9048	TGAGGTAGTAGGTTGTGTGGTAT	23	1	hsa-let-7b-5p:1-21(1)	17.5239	0	10.0616	0	0	9.6193	20.2385	6.96999	2.04142	5.34336	1.06008	8.28715	10.2578	11.9981	9.02227	2.65115	0	0	0	0	0	0	0	4.29279	0	0	0	0	2.41347	0	4.26854	8.8848	12.3044	5.33784	19.777	10.6314	0	27.4606	0	7.14459	8.50395	5.31542	18.319	3.8363	4.2748
srna42930	TGAGGTAGTAGGTTGTGTGGTTTAT	25	1	hsa-let-7b-5p:1-21(1)	0	0	3.80708	0	0	4.96891	2.13037	4.11863	0	0.963556	0.176679	0.849964	1.37689	0	3.63924	0.203935	0	0.334437	0	0	0	0	0	0	0	0	0	0	1.34081	0	0	4.72005	0	3.69543	0	0	0	0	0	4.08262	1.47895	0	0	0	0
srna39652	TGAGGTAGTAGGTTGTGTGGTTAAT	25	1	hsa-let-7b-5p:1-21(1)	0	0	0	0	0	2.22964	1.27822	3.16818	0	0	0.176679	1.06246	1.78996	0.210494	4.09414	0.917707	0	0	0	0	0	0	0	0	0	0	4.33347	0	1.16204	0	0	3.05415	0	0	3.12268	0	0	9.66922	0	0	1.47895	0	2.78263	1.50712	1.80491
srna37967	TGAGGTAGTAGGTTGTGTGGTTCT	24	1	hsa-let-7b-5p:1-21(1)	0.417235	0	0	0	0	4.39558	3.69264	0	0	1.40154	0	0	0.206534	0.0701646	6.40657	3.67083	0	0	0	0	0	0	0	0	0	2.14602	0	9.37976	2.59224	0	0	0	0	2.46362	0	0	0	0	0	0	1.84868	1.22664	0.463772	0	1.04495
srna585	TGAGGTAGTAGGTTGTGTGGT	21	1	hsa-let-7b-5p:1-21(1)	83.0298	42.806	143.853	0	65.0195	184.168	410.735	122.292	75.0221	155.746	227.916	141.519	189.116	265.362	146.82	100.03	24.802	2.34106	20.9297	0	17.9446	38.1411	21.4328	185.408	3.88336	92.2789	51.7308	105.609	124.606	24.3736	67.7146	94.1233	88.7212	127.903	130.285	34.3475	95.532	175.98	43.4697	129.419	260.849	140.245	228.408	195.514	185.336
srna13362	TGAGGTAGTAGGTTGTGTGGTAG	23	1	hsa-let-7b-5p:1-21(1)	1.66894	0	18.0836	0	7.39352	4.58669	11.575	2.53454	1.8713	6.04412	7.77389	4.03733	11.7036	4.63086	3.41178	2.14132	0	0	0.216888	0	0	0	0	0.408837	15.5334	3.90186	0	0	1.07265	0	0.388049	8.05185	0	1.23181	2.25527	0	40.6519	26.6871	3.39276	0	8.50395	5.7243	2.78263	3.15124	1.23494
srna20661	TGAGGTAGTAGGTTGTGTGGTTGT	24	1	hsa-let-7b-5p:1-21(1)	0	0	4.89481	0	0	3.44002	4.0477	0	0	3.67903	0	0	1.99649	3.85905	6.5203	1.32558	0	0	0	0	0	0	0	4.08837	0	0	0	8.68496	6.79346	0.83227	0	0	0	7.39086	1.9083	0	0	0	0	0	3.32763	5.11098	0	1.2331	0.759964
srna30956	TGAGGTAGTAGGTTGTGTGGTAC	23	1	hsa-let-7b-5p:1-21(1)	15.0205	0	0.951769	0	0	1.84742	2.48543	0.633636	0	1.48913	2.29683	0	4.06183	2.03477	1.78171	0.203935	0	0	0	0	0	0	0	0	0	4.29204	0	0.347398	1.25143	0	0	0	9.0664	2.87422	2.77571	0	0	0	0	0	4.06711	2.86215	0	0	1.32994
srna1995	TGAGGTAGTAGGTTGTGTGGTA	22	1	hsa-let-7b-5p:1-21(1)	53.4061	26.2078	59.4176	0	23.2678	40.2609	93.9493	40.2359	2.21154	27.33	43.4631	55.0352	70.015	64.4111	21.7596	16.8246	77.9492	2.34106	8.8924	0	0	5.86786	19.8646	25.7568	0	10.7301	15.9797	20.4965	21.7212	4.16135	8.53708	29.4309	44.6844	61.7958	37.2986	44.9789	56.9127	40.6107	34.9878	29.599	69.6954	40.0701	57.7396	40.4181	26.6937
srna22294	TGAGGTAGTAGGTTGTGTGGTAAA	24	1	hsa-let-7b-5p:1-21(1)	0	0	0.407901	0	0	4.90521	5.96504	9.50454	0.510354	4.64259	4.41698	16.3618	6.74677	4.91152	2.35034	1.01967	0	0	0	0	0.294174	0	2.35238	0.204419	0	1.95093	0.812525	0	0	1.07006	0	0.83295	0	4.31133	0	13.0848	0	5.41477	0	3.06197	3.69737	0.817757	3.71017	1.37011	4.55979
srna45098	TGAGGTAGTAGGTTGTGTGGTG	22	1	hsa-let-7b-5p:1-21(1)	0	0	0.135967	0	0	0.31852	2.98252	3.16818	0.510354	1.66432	0.353358	0.637473	2.13418	5.89383	1.40262	0.305902	0	0	0	0	0	0	0	0.817675	0	0.195093	0	1.73699	1.96653	0	2.03726	0	0	0.205302	1.73482	0.817798	0	0.386769	0	0	0.739474	2.65771	0.463772	1.50712	1.51993
srna29040	TGAGGTAGTAGGTTGTGTGGTAGA	24	1	hsa-let-7b-5p:1-21(1)	0	0	0	0	3.04439	1.97482	0.710123	0	0	0.788364	0.176679	7.64968	3.8553	4.98169	1.70589	0	0	0	5.63908	0	0	0	0	4.70163	0	0	0	0	0	0	0	7.49655	0	0	5.20446	0	0	0	0	0.204131	2.58816	5.31542	3.47829	4.65836	0
srna3843	TGAGGTAGTAGGTTGTGTGGTTAT	24	1	hsa-let-7b-5p:1-21(1)	6.67576	0	17.4038	0	7.39352	32.2342	33.0207	4.43545	8.50591	9.98594	12.8976	22.0991	19.1388	18.4533	46.6656	15.2951	0	0.668875	3.4702	0	0	0.366741	0	4.08837	3.88336	0.585278	0.270842	15.6329	18.8608	6.89595	4.07452	7.2189	3.5618	7.59616	20.8178	0	0	9.66922	0	8.98177	22.1842	20.6484	13.2175	5.34341	10.3545
srna4984	TGAGGTAGTAGGTTGTGTGGTAA	23	1	hsa-let-7b-5p:1-21(1)	23.7824	26.2078	14.9564	0	6.5237	18.3468	24.3572	19.9595	4.76331	17.9572	23.675	25.7114	28.777	21.33	5.68631	5.09837	7.08629	0	0	0	0	0	0	17.9888	0	1.75584	0	5.55838	9.83264	0	4.65659	1.94355	0	29.974	24.6344	2.45339	0	1.93384	17.1758	21.0255	29.7638	16.5596	14.145	5.34341	12.9194
srna46439	TGAGGTAGTAGGTTGTGTGGTTTG	24	1	hsa-let-7b-5p:1-22(1)	0	0	0	0	0	0.445928	4.11872	0	0	0	0	0	0.688446	1.1928	2.00916	1.32558	0	0	0.108444	0	0	0	0	2.04419	0	0	0	0	3.21795	0	0	0.27765	0	0	0	0	0	25.14	0	0	0.739474	0	0.231886	0.548042	0
srna21892	TGAGGTAGTAGGTTGTGTGGTTAC	24	1	hsa-let-7b-5p:1-22(1)	0	1.74718	8.56592	0	4.13167	5.47854	2.48543	4.11863	0	1.48913	0	0	2.68494	2.80658	2.19871	0.917707	0	0	0	0	0	0	0	4.29279	0	2.53621	5.95852	3.12659	5.09509	0	0	5.553	0	4.31133	0	0	0	0	6.36142	6.12393	9.42829	5.92874	5.10149	0	0.569973
srna3626	TGAGGTAGTAGGTTGTGTGGTTG	23	1	hsa-let-7b-5p:1-22(1)	1.25171	0	35.8953	0	11.7427	17.5186	27.6238	13.3064	5.78402	9.98594	49.4702	40.3733	14.8016	39.4325	14.1779	6.52591	0	0	6.83196	0	0	0	6.5344	9.60768	3.88336	14.2418	0.270842	12.1589	21.0061	4.16135	10.3803	18.0472	4.5332	11.9075	36.6047	0.817798	0	17.4046	26.2939	29.8032	31.2428	17.7862	19.9422	18.4964	14.9143
srna21880	TGAGGTAGTAGGTTGTGTGGTTC	23	1	hsa-let-7b-5p:1-22(1)	13.7688	0	5.03078	0	0	7.38966	8.45047	0.950454	0	2.71548	4.41698	0.637473	1.8588	5.7535	6.25494	2.95705	3.54315	0	0	0	0	0	6.79578	0.408837	0	0	0	0	1.87714	0	0	0	0	1.02651	0	0	0	0	0	0	7.20987	3.67991	6.4928	0	2.84987
srna5919	TGAGGTAGTAGGTTGTGTGGTTAG	24	1	hsa-let-7b-5p:1-22(1)	18.7756	0	11.8291	0	3.26185	13.7601	15.5517	15.5241	0.680472	2.2775	36.7493	17.2118	12.5297	20.9792	2.35034	5.91411	0	0	3.68709	0	0	0	0	17.1712	0	1.95093	0	0.694797	10.2796	4.63694	0.776098	10.8283	4.2094	32.0271	25.1549	0	0	40.9975	12.5108	8.77764	9.05855	12.6752	17.1596	8.90569	8.35961
srna8258	TGAGGTAGTAGGTTGTGTGGTTTA	24	1	hsa-let-7b-5p:1-22(1)	0	9.60951	1.90354	0	0	21.6594	24.2862	13.94	2.04142	14.103	19.9648	10.6246	16.9358	11.1562	16.5661	6.72985	0	1.67219	0	0	0	0	0	0.817675	0	3.12149	0	0	4.46938	0	0	9.71775	0	0	4.68401	0	0	8.12215	5.72528	0	16.4533	11.8575	15.3045	3.28825	3.98981
srna25613	TGAGGTAGTCGGTTGTGTGGTT	22	1	hsa-let-7b-5p:1-22(1)	2.08618	3.49437	9.38172	0	3.04439	11.9126	15.6227	3.80182	4.25295	4.64259	0	0	0	0.0701646	0.0379087	0	0	0	0.108444	0	0	0	0	0	0	0	0	0	0	0	0	0.83295	0	0	0.520446	2.45339	0	5.80153	1.90843	7.75698	18.1171	6.13318	12.29	4.79537	7.59964
srna3591	TGAGGTAGTAGGTTGTGTGGTTAA	24	1	hsa-let-7b-5p:1-22(1)	7.51023	22.7134	12.1011	0	4.56659	31.7246	35.0801	27.5632	5.10354	14.6285	48.2334	28.2613	29.5343	37.0469	13.9504	6.52591	0	0	0.108444	64.8886	0	0	6.01165	9.8121	0	6.04788	1.08337	4.86358	9.47509	2.49681	5.5297	8.8848	7.1236	11.9075	69.2193	0	0	6.57507	14.2072	8.57351	46.2171	27.8037	38.7249	9.86476	24.6038
srna33682	TGAGTTAGTAGGTTGTGTGGTT	22	1	hsa-let-7b-5p:1-22(1)	5.00682	6.11514	16.588	0	6.08878	1.78371	2.69847	0.316818	0.510354	0.963556	1.94347	1.06246	2.54725	3.29774	0	0	0	0	0.759107	0	0	2.20045	0.261376	0	0	0	0	0.347398	0	0	0	0	0	0	0	0	4.06519	7.73538	3.18071	10.819	2.58816	1.0222	1.39132	1.50712	1.23494
srna8261	TGAGGTAGTAGGTTGTGTGGTTGA	24	1	hsa-let-7b-5p:1-22(1)	0	0	7.47818	0	7.82844	7.70818	13.1373	3.80182	3.57248	12.4386	26.5019	21.2491	6.26486	13.6119	5.80003	3.26296	0	0	0	0	0	0	0	10.4254	0	5.07241	4.60431	0	3.66489	6.89595	9.31318	15.5484	20.0756	6.36435	4.16357	0	2.03259	0	20.5686	0.612393	20.3355	3.47547	21.1016	6.85053	9.21457
srna43614	TGAGGTAGTAGGTTGTGTGGTTAAA	25	1	hsa-let-7b-5p:1-22(1)	0	0	2.85531	0	0	0.445928	2.69847	0	0	0.963556	1.23675	0.424982	4.75028	5.40267	0.720266	1.42754	0	0	0	0	0	0	0	0	0	0	0	0	1.07265	0	0	3.05415	0	4.92724	0.173482	0	0	0	0	0	3.5125	1.83995	5.10149	1.50712	2.0899
srna19413	TGAGGTAGTAGGTTGTGTGGTTAGA	25	1	hsa-let-7b-5p:1-22(1)	0	0	0.135967	0	0	5.60595	3.83467	10.1382	0	0.175192	4.77034	7.64968	12.3232	6.59547	1.59217	3.87476	0	0	0	0	0	0	0	7.56349	0	6.43806	0	0	1.16204	0	0.970123	0	0	10.4704	5.03098	0	0	3.86769	0	4.69502	7.20987	2.86215	8.34789	3.56228	1.32994
srna1197	TGAGGTAGTAGGTTGTGTGGTTA	23	1	hsa-let-7b-5p:1-22(1)	63.837	26.2078	82.532	0	21.9631	90.3323	133.858	82.6895	19.5636	63.3319	140.99	97.3209	89.7734	124.332	51.8591	30.9981	53.1472	0.334437	9.97684	4.78126	13.2379	21.6377	28.2286	40.0661	0	22.8259	15.9797	36.1294	42.5485	5.23141	19.4025	61.083	67.998	96.6971	89.1698	5.72459	32.5215	43.3181	35.624	26.1288	136.063	111.011	104.349	27.6761	59.2772
srna252	TGAGGTAGTAGGTTGTGTGGTT	22	1	hsa-let-7b-5p:1-22(1)	219.883	245.479	446.652	0	145.044	724.251	1101.76	370.043	227.108	387.788	528.801	427.744	429.315	809.419	432.121	208.727	99.2081	16.3874	50.8602	0	15.5912	81.0498	16.7281	307.855	81.5505	225.527	89.6486	230.673	357.193	96.7812	185.002	323.74	187.804	297.893	477.943	59.6992	85.369	183.715	122.988	287.825	702.685	422.371	649.28	401.03	480.487
srna23500	GAGGTAGTAGGTTGTGTGG	19	1	hsa-let-7b-5p:2-20(1)	1.25171	0	4.07901	0	3.4793	2.93038	4.54479	1.58409	2.04142	2.89067	4.41698	2.76238	4.13068	3.99938	3.14642	2.14132	0	0	0.325332	0	0	1.10022	0.261376	2.86186	0	0.585278	0.812525	1.38959	1.07265	0.356687	0.582074	1.94355	0.6476	2.25832	2.77571	0.817798	0	5.80153	3.60481	5.10328	3.32763	4.49766	4.8696	1.78114	3.32484
srna43009	GAGGTAGTAGGTTGTGTGGTTT	22	1	hsa-let-7b-5p:2-20(1)	0.417235	0.873592	0.679835	0	0.434913	3.31261	4.33175	1.26727	0.340236	1.31394	1.06008	0.212491	1.03267	1.05247	3.44969	0.509837	0	0.334437	0.108444	0	0	0	0	0	0	0.390186	0	0	1.34081	0	0	0.27765	0	0.205302	0.346964	0	0	1.16031	0.212047	0	1.29408	1.43107	0.695658	0.274021	1.13995
srna15377	GAGGTAGTAGGTTGTGTGGT	20	1	hsa-let-7b-5p:2-21(1)	1.66894	1.74718	7.34222	0	2.39202	4.45928	10.5098	2.53454	1.36094	4.4674	6.00709	3.61235	4.95681	7.01646	4.32159	2.95705	0	0	0.542219	0	0.588349	0.366741	0.261376	4.08837	0	2.53621	0.812525	3.47398	2.68163	0.475583	1.26116	2.7765	2.5904	1.84771	3.12268	2.45339	6.09778	9.66922	1.06024	4.89915	7.39474	4.49766	4.17395	5.06939	4.65478
srna36005	GAGGTAGTAGGTTGTGTGGTTA	22	1	hsa-let-7b-5p:2-22(1)	2.92065	0.873592	5.03078	0	2.60948	2.42075	2.98252	1.26727	0.510354	1.40154	4.41698	2.97487	1.58343	3.29774	1.17517	0.203935	0	0	0	0.683038	0.588349	1.10022	0.784128	0.613256	0	0.975464	0	0.694797	1.60898	0.237792	0.194025	1.94355	0.9714	0.410603	2.60223	0	2.03259	2.32061	2.33252	1.22479	4.25197	2.45327	2.78263	0.548042	1.51993
srna6041	GAGGTAGTAGGTTGTGTGGTT	21	1	hsa-let-7b-5p:2-22(1)	12.5171	10.4831	23.7942	0	8.69826	18.9201	26.7717	8.8709	6.29437	11.2123	13.781	9.77459	9.84478	22.8737	13.0785	6.52591	0	0	1.51821	0	0.588349	2.93393	0	7.97233	0	6.04788	3.79178	3.82138	6.61468	1.90233	3.78348	8.8848	4.2094	7.39086	11.1028	6.54238	4.06519	10.4428	6.36142	13.8809	21.075	11.8575	19.7103	10.6868	13.7744
srna21242	GGTAGTAGGTTGTGTGGTT	19	1	hsa-let-7b-5p:4-22(1)	5.42406	7.86233	11.8291	0	5.0015	4.58669	5.96504	1.58409	2.21154	2.2775	2.82687	2.76238	2.47841	4.42037	2.6157	1.22361	0	0.334437	1.30133	0	0.294174	0	0	3.2707	7.76672	1.56074	1.08337	1.73699	2.41347	0.713375	1.16415	2.49885	1.2952	3.69543	3.29616	1.6356	2.03259	6.1883	3.81685	7.34872	3.32763	2.24883	1.6232	2.19217	2.1849
srna24735	TGCGGTAGTAGGTTGTGTGGTT	22	1	hsa-let-7b-5p:4-22(1)	6.25853	10.4831	14.8204	0	4.34913	1.46519	1.7043	0	0.340236	0.87596	5.47706	4.03733	5.36988	11.4368	0	0	0	0	0.108444	0	0	0	0	0.408837	0	0.585278	0	0.347398	0.178775	0	0	0	0	0	0	0.817798	6.09778	6.96184	3.18071	5.71567	1.10921	1.22664	1.6232	0.959074	0.664969
srna34913	TGATGTAGTAGGTTGTGTGGTT	22	1	hsa-let-7b-5p:5-22(1)	0	1.74718	0.407901	0	0	7.38966	10.8649	3.485	2.21154	3.94182	1.06008	1.48744	0.688446	1.82428	0	0	0	0	0	0	0	0.366741	0	0.408837	0	0.195093	0	0	0.178775	0	0	0	0	0.410603	0	0	0	0.386769	0	0.408262	7.94934	3.67991	4.17395	3.97331	5.50974
srna42682	TGAGGTAGTAGGTTGTAA	18	2	hsa-let-7c-5p:1-17(1);hsa-let-7a-5p:1-17(1)	0	1.74718	2.0395	0	0	1.5289	2.91151	2.85136	4.08283	2.54028	0	0	1.17036	1.33313	0.492813	1.83541	0	0	0	0	0	0	0	0.204419	0	1.75584	0	2.77919	0.983264	0.594479	0.0970123	0.5553	0	0.205302	3.12268	0	0	6.57507	0.212047	5.71567	6.84013	1.0222	1.6232	1.2331	0
srna1864	TGAGGTAGTAGGTTGTA	17	2	hsa-let-7c-5p:1-17(1);hsa-let-7a-5p:1-17(1)	38.3856	30.5757	25.9697	0	11.9601	36.0565	51.768	41.82	13.2692	29.6074	46.9967	22.0991	78.0009	40.064	37.9466	46.4971	3.54315	10.702	1.7351	0	8.53106	12.1025	0.522752	46.6075	7.76672	23.8013	26.5425	44.1196	26.1012	4.04246	7.66397	48.0334	45.6558	74.7298	79.6282	16.356	0	17.7914	22.477	24.904	72.6533	29.6437	69.3339	26.443	19.0941
srna33727	TGAGGTAGTAGGTTGTATGGTTT	23	1	hsa-let-7c-5p:1-20(1)	0	6.98874	0.271934	0	0	4.52298	2.98252	5.06909	1.53106	1.48913	0	0	0.275378	3.01708	0.8719	0.305902	0	3.67881	0	0	0	0	0	1.22651	0	0.195093	0	0	4.91632	0	1.06714	5.83065	0	0	7.11276	0	0	0	0	0	0.554605	3.06659	0	0	2.37489
srna13158	TGAGGTAGTAGGTTGTATGGTA	22	1	hsa-let-7c-5p:1-21(1)	0.417235	0	0.135967	0	3.69676	3.05779	7.74034	6.33636	2.55177	7.09528	5.1237	8.92462	10.0513	7.78827	2.12289	4.0787	0	0	0	0	0	0	0	2.24861	0	0.390186	0.270842	0	3.93305	0	0	0	0	2.05302	19.43	0	40.6519	0	0	3.06197	10.5375	4.49766	7.18846	4.38434	0.664969
srna10836	TGAGGTAGTAGGTTGTATGGT	21	1	hsa-let-7c-5p:1-21(1)	0.417235	0	5.71061	0	0	7.32596	10.6519	0.633636	2.38165	4.81778	18.9047	0.424982	5.43872	6.52531	3.26015	2.34525	0	0.668875	0	0	0	0	0	15.5358	0	0.780371	1.35421	2.43179	10.5477	0.356687	2.61933	1.1106	0	2.87422	10.4089	0	0	5.028	0	6.5322	21.075	4.49766	4.8696	0.548042	2.75487
srna1542	TGAGGTAGTAGGTTGTATGGTT	22	1	hsa-let-7c-5p:1-22(1)	26.2858	41.0588	12.7809	0	23.4853	61.2832	78.2556	35.1668	24.3269	66.135	45.0532	49.0854	48.9485	84.408	39.1218	32.3237	3.54315	22.0729	3.90398	2.73215	0	0	0	29.4363	0	25.3621	17.3339	17.7173	94.7509	1.54565	7.46995	26.6544	0.6476	38.802	107.385	6.54238	87.4016	29.3944	5.93733	12.452	84.6697	49.2699	48.0004	24.1139	27.9287
srna13252	TGAGGTAGTAGGTTGTATGGTTA	23	1	hsa-let-7c-5p:1-22(1)	0	0	3.53514	0	0.434913	3.82224	4.82884	5.3859	1.70118	2.36509	5.83041	12.7495	6.67793	3.78889	3.41178	2.54918	0	0.668875	0	0	0.294174	0	0	1.63535	0	1.56074	0	13.8959	16.7155	0.237792	0.0970123	10.5507	5.8284	0.410603	20.2974	0	0	0	1.48433	0	15.8987	2.86215	10.203	1.91815	2.27989
srna44947	GAGGTAGTAGGTTGTATGGTT	21	1	hsa-let-7c-5p:2-22(1)	1.66894	3.49437	0.271934	0	1.73965	1.46519	1.91733	0.950454	0.340236	2.2775	1.23675	0.212491	1.58343	2.45576	1.36471	1.32558	0	0.668875	0	0	0	0	0	0.613256	0	0.390186	0.812525	0.694797	1.96653	0	0.0970123	0.83295	0	0.410603	3.46964	0.817798	2.03259	1.54708	0.424095	0.204131	3.32763	1.83995	0.695658	0.274021	0.664969
srna41226	CTATACGACCTGCTGCC	17	1	hsa-let-7d-3p:1-17(1)	0	0	5.43868	0	1.73965	0.445928	1.1362	0.633636	2.38165	2.01471	0.176679	0.212491	1.17036	1.47346	0.454905	2.34525	0	0	0	0	3.82427	0.366741	5.75027	4.29279	0	0	0	7.29537	1.96653	1.18896	0.0970123	0	0.3238	3.49013	1.56134	0	0	0	11.4506	0.612393	2.21842	3.47547	0	1.2331	1.70992
srna17228	CTATACGACCTGCTGCCTT	19	1	hsa-let-7d-3p:1-19(1)	0.417235	0	3.26321	0	0	1.08297	3.83467	4.75227	9.69673	7.88364	7.06717	1.69993	3.16685	0.491152	4.7765	5.60821	0	1.33775	0.108444	0	0.588349	1.10022	0.261376	2.24861	0	14.4369	0	0.347398	5.09509	0.475583	2.42531	0.5553	0.6476	0.615905	3.8166	0	0	0	5.51323	0	5.91579	3.88435	7.18846	6.85053	9.11957
srna3421	CTATACGACCTGCTGCCTTT	20	1	hsa-let-7d-3p:1-20(1)	20.4445	3.49437	5.84658	0	11.5252	19.2386	17.8951	23.7613	36.065	31.7973	30.0355	18.4867	10.7398	15.2959	15.2014	15.2951	56.6903	1.00331	9.54306	0	6.47184	9.90202	17.5122	24.1214	0	25.9473	36.5636	33.0029	19.4865	31.2696	16.3951	34.7062	11.333	18.0665	11.6233	0	0	0.773538	2.54457	7.55285	9.9829	17.9907	10.4349	30.9644	37.7132
srna1411	CTATACGACCTGCTGCCTTTC	21	1	hsa-let-7d-3p:1-21(1)	34.2133	61.1514	22.2986	0	52.8419	51.0269	48.5014	92.5108	63.1138	57.2002	56.714	99.2333	48.6731	57.114	46.6656	53.023	0	7.35762	49.0166	3.41519	33.2417	61.2458	61.4234	45.5854	0	53.0652	27.0842	40.993	38.7048	30.4373	14.9399	52.1982	48.8938	27.7157	61.4126	28.6229	0	29.3944	41.7733	38.7849	47.6961	65.0117	56.5802	37.8149	48.3527
srna9508	CTATACGACCTGCTGCCTTTCA	22	1	hsa-let-7d-3p:1-21(1)	19.1928	13.1039	0	0	0	14.0786	7.81136	12.3559	4.25295	16.1177	4.06362	4.03733	10.0513	5.7535	7.27847	2.03935	0	0.334437	4.55464	0	0.588349	1.46697	9.40954	5.72372	0	8.97427	7.58357	2.43179	3.12857	1.90233	0.388049	0.27765	0	0	20.2974	0	0	3.48092	0	0	7.39474	16.5596	15.7682	8.63167	6.64969
srna30055	CTATACGACCTGCTGCCTTTCC	22	1	hsa-let-7d-3p:1-21(1)	0	0	3.39917	0	0	6.11558	5.1839	0	0.170118	7.62085	0	0	4.54374	0.631481	1.36471	2.54918	0	0	0	0	0	2.20045	0	5.11047	0	0	0	0	6.34652	0	0.194025	0	0	0	0	0	0	0	0	0	3.5125	5.31542	1.6232	1.91815	1.51993
srna582	CTATACGACCTGCTGCCTTTCT	22	1	hsa-let-7d-3p:1-22(1)	162.304	65.5194	193.209	0	41.9691	249.083	197.982	219.555	178.454	153.03	180.389	202.716	189.667	102.3	315.931	153.053	3.54315	14.0464	60.4032	107.92	137.085	43.2755	78.1514	121.629	0	53.0652	118.087	102.83	145.97	41.9702	42.2974	145.766	96.1686	65.4912	187.881	73.6018	2.03259	132.275	42.8336	24.0875	202.986	232.243	151.885	99.1957	117.794
srna25723	TATACGACCTGCTGCCTTT	19	1	hsa-let-7d-3p:2-20(1)	1.66894	2.62078	0.135967	0	0.65237	1.33778	0.852148	4.43545	5.6139	1.92711	4.94702	1.06246	1.99649	1.40329	1.02354	0.40787	0	0	0.325332	0	1.47087	0.366741	1.82963	2.65744	0	0.780371	1.08337	0.694797	0.625713	2.14012	2.42531	2.2212	0	0.205302	2.60223	0	0	0	0.424095	0	0.924342	2.65771	6.26092	3.15124	4.36979
srna9545	TATACGACCTGCTGCCTTTC	20	1	hsa-let-7d-3p:2-21(1)	16.6894	26.2078	1.08774	0	7.61098	3.75854	6.95921	3.80182	8.84614	13.0518	20.6715	5.52477	10.189	8.63024	5.07977	3.46689	3.54315	0.334437	3.14487	0.683038	11.4728	17.9703	5.4889	2.24861	0	2.34111	10.8337	1.38959	6.25713	3.32908	0.388049	16.659	3.5618	1.02651	11.4498	1.6356	12.1956	3.48092	2.54457	2.44957	5.91579	8.99533	4.40583	4.38434	4.65478
srna3650	TATACGACCTGCTGCCTTTCT	21	1	hsa-let-7d-3p:2-22(1)	17.9411	28.8285	21.0749	0	1.08728	21.086	17.469	14.8904	12.929	16.6432	25.0885	48.023	33.8027	15.9274	33.208	11.1144	3.54315	13.7119	15.399	23.2233	13.2379	0.733483	29.5355	4.90605	0	12.8761	28.1675	8.33756	21.1849	2.14012	9.79824	13.8825	8.095	12.7287	6.7658	3.27119	0	13.1501	2.33252	1.42892	22.1842	33.3236	15.7682	10.1388	22.8939
srna33662	ATACGACCTGCTGCCTTTCT	20	1	hsa-let-7d-3p:3-22(1)	1.66894	0.873592	2.17547	0	0.217457	2.54816	1.42025	4.43545	2.04142	1.40154	2.29683	2.3374	3.09801	1.40329	1.7438	0.611804	3.54315	0.334437	1.19288	0.683038	1.1767	0.366741	1.0455	0.408837	0	0.975464	3.2501	1.0422	1.69836	0.475583	0.485062	1.94355	0.3238	0.410603	0.693928	0.817798	0	2.32061	0.424095	0.204131	5.36118	4.49766	2.08697	3.28825	1.70992
srna34211	TACGACCTGCTGCCTTTCT	19	1	hsa-let-7d-3p:4-22(1)	6.67576	1.74718	6.11851	0	0.65237	2.35705	2.48543	0.950454	1.19083	2.1023	2.12015	3.61235	2.34072	1.75411	3.0327	1.22361	0	0.334437	1.08444	0	1.47087	0.366741	1.30688	0.204419	0	0.390186	0.812525	0.694797	1.60898	0.356687	0.776098	1.6659	0	0.615905	0.86741	0	0	3.48092	1.48433	0.408262	2.77303	4.08878	0.463772	0.959074	1.61492
srna20279	AGAGGTAGTAGGTTG	15	1	hsa-let-7d-5p:1-15(1)	0.417235	6.98874	0.135967	0	1.73965	2.54816	6.8882	3.80182	2.89201	6.21932	1.76679	0.424982	3.78645	0.91214	4.05623	0.509837	0	0	4.33775	0	2.05922	0	0.261376	7.56349	0	0.780371	0	0	5.63142	0.118896	0.679086	0.27765	0.6476	3.69543	1.21437	0	0	0	0	5.10328	4.80658	0	4.17395	1.91815	3.22985
srna6363	AGAGGTAGTAGGTTGC	16	1	hsa-let-7d-5p:1-16(1)	7.51023	7.86233	1.76757	0	3.69676	9.74671	8.23743	38.0182	8.84614	14.103	36.5726	22.3116	12.1855	7.36728	10.9177	13.5617	0	3.00994	0.542219	0	0	0	13.5916	14.9226	0	11.9007	2.43758	4.51618	7.06162	2.37792	2.3283	9.71775	5.8284	25.6627	22.5527	0	0	8.50892	5.08914	1.83718	13.1257	14.9241	41.5076	3.69929	12.6344
srna22342	AGAGGTAGTAGGTTGCA	17	1	hsa-let-7d-5p:1-17(1)	0	0	2.31144	0	0	0.700744	3.4796	0	0.170118	0.525576	2.65019	5.31228	3.09801	2.31543	1.89544	5.20034	0	0	0	0	5.29514	0	1.82963	4.29279	0	2.34111	0	4.51618	2.77102	0	0.194025	10.273	3.8856	5.74845	0.346964	0	0	1.93384	2.54457	0.204131	4.06711	6.13318	0	0.822064	1.23494
srna5033	AGAGGTAGTAGGTTGCATA	19	1	hsa-let-7d-5p:1-19(1)	19.6101	0	0	0	6.5237	3.75854	12.2141	6.01954	17.5222	7.00768	6.53713	8.28715	29.8786	8.63024	14.0641	17.0286	0	0.668875	5.85597	0	0.588349	12.8359	6.27303	40.0661	0	7.41353	2.16673	3.82138	16.1792	13.1974	19.3054	17.4919	19.1042	14.987	13.0112	0	0	0	2.96866	0	9.05855	8.99533	6.95658	6.85053	4.36979
srna1526	AGAGGTAGTAGGTTGCATAG	20	1	hsa-let-7d-5p:1-20(1)	5.42406	0.873592	13.3248	0	0	11.0208	35.7192	17.1082	23.8165	31.1842	46.9967	73.3094	91.6322	46.7296	62.3977	75.7618	3.54315	1.67219	21.9057	0	27.3582	5.86786	41.8202	65.0052	3.88336	53.6505	36.2928	38.9086	44.4256	18.4288	26.5814	41.6475	76.093	70.6238	86.5675	0.817798	0	0.386769	5.51323	1.02066	27.7303	56.2208	20.1741	25.0729	42.843
srna14260	AGAGGTAGTAGGTTGCATAGA	21	1	hsa-let-7d-5p:1-20(1)	0	0	0	0	0	0.509632	7.31427	0.633636	0.510354	1.48913	0	9.5621	11.0151	3.50823	1.44053	4.48657	0	0	0	0	0	0	0.522752	8.58559	0	10.7301	4.33347	0.694797	11.7992	1.42675	1.06714	17.4919	5.5046	1.23181	5.55142	0	0	0	0	0	4.99145	0.204439	0.927544	1.91815	5.79473
srna7238	AGAGGTAGTAGGTTGCATAGTTT	23	1	hsa-let-7d-5p:1-20(1)	15.4377	0	2.17547	0	0	6.49781	13.4213	0	1.19083	3.59144	5.30038	14.6619	7.36637	7.78827	31.3884	14.7853	0	0.334437	0.108444	0	0	0	0	3.67954	0	4.87732	1.62505	0.347398	21.453	0	7.37293	8.8848	1.2952	10.881	1.9083	0.817798	0	0	0	0	8.68882	7.76869	0.463772	2.74021	8.16961
srna7096	AGAGGTAGTAGGTTGCATAGTA	22	1	hsa-let-7d-5p:1-21(1)	15.4377	0	1.49564	0	0	0.382224	6.81718	8.55408	3.57248	3.50384	14.6644	14.6619	11.6347	14.3837	6.33076	8.97313	0	0.334437	10.5191	0	0	0	8.88679	17.9888	0	6.82825	21.3965	13.8959	16.8943	2.02123	2.3283	7.2189	15.2186	19.709	17.3482	0	0	0	0	0	9.61316	11.4486	6.26092	4.24733	6.83968
srna314	AGAGGTAGTAGGTTGCATAGT	21	1	hsa-let-7d-5p:1-21(1)	79.2747	56.7835	42.5577	0	29.5741	103.2	256.923	133.064	184.748	160.651	425.444	433.057	405.082	346.262	336.212	365.043	3.54315	14.0464	111.263	10.9286	139.439	84.3505	194.202	898.42	42.717	450.664	344.511	331.766	424.859	150.641	283.761	382.879	204.318	575.05	640.669	15.5382	14.2282	7.73538	23.9614	29.3949	147.71	267.611	185.509	122.213	241.574
srna40707	AGAGGTAGTAGGTTGCCTAGTT	22	1	hsa-let-7d-5p:1-22(1)	0.417235	0.873592	0	0	0.217457	0.254816	0.284049	0	0	0.175192	0.176679	0.212491	0	0	0	0	0	0	0	0	0	0	0	8.58559	0	7.99881	2.16673	4.86358	5.81019	0.118896	0.194025	0.27765	0.3238	0	0.520446	0	0	0	0	0	0.184868	0.408878	0	0	0.284987
srna35063	AGAGGTAGTAGGTTGCATAGTTG	23	1	hsa-let-7d-5p:1-22(1)	0	0	0	0	0	2.48446	0.92316	0	0	0	0	11.8995	0	3.15741	2.95688	0.611804	0	0	1.40977	0	0	0	0	0	0	2.53621	0	0	0.536326	0	0.194025	4.4424	0	4.92724	3.99009	0	0	0	0	0	0	0	0.231886	0	3.70483
srna37077	AGAGGTAGTAGGTTACATAGTT	22	1	hsa-let-7d-5p:1-22(1)	0.417235	0	0	0	0.434913	0.95556	1.98835	0	0.510354	0.350384	3.18023	2.76238	1.65227	1.40329	2.76734	0.815739	0	0	0.216888	0	0	0	0.784128	2.86186	0	1.56074	1.89589	2.08439	2.8604	0.713375	1.35817	2.2212	0.6476	1.64241	2.77571	0	0	0	0	0	0.554605	1.83995	0.695658	0.411032	1.04495
srna40946	AGAGGTAGTAGGTTGCATAGTTC	23	1	hsa-let-7d-5p:1-22(1)	0	0	0	0	0	0.63704	3.55062	0	0	0.262788	0	1.48744	2.06534	0	5.07977	5.60821	0	0	0	0	0	0	0	0	0	0	0	0.347398	3.21795	0	0.485062	0	0	0	0.173482	0	0	0	0	0	1.84868	0.204439	1.6232	0	0
srna23573	AGAGGTAGTAGGTTGCATAGTTAA	24	1	hsa-let-7d-5p:1-22(1)	0	0	0	0	0	1.91112	2.41442	0	0	0.87596	0	2.76238	3.57992	2.94691	4.43532	3.67083	0	0	0	0	0	0	0	5.51931	0	2.34111	0.541683	0.347398	2.05591	0	4.94763	1.94355	0	0	14.399	0	0	0	0	0	1.47895	0	2.08697	0	5.69973
srna10295	AGAGGTAGTAGGTTGCATAGTTA	23	1	hsa-let-7d-5p:1-22(1)	0	0	0	0	0	3.37631	6.53314	4.11863	1.53106	4.02942	16.7845	13.8119	2.13418	7.08662	11.8654	4.58853	0	0	0	0	0	0.733483	0	6.13256	0	8.1939	3.2501	0.694797	8.22366	4.75583	4.07452	0.27765	0.9714	12.3181	19.083	0	0	0	0	0	2.40329	2.86215	2.08697	3.28825	3.22985
srna246	AGAGGTAGTAGGTTGCATAGTT	22	1	hsa-let-7d-5p:1-22(1)	114.74	38.4381	36.5751	0	33.7058	254.115	433.672	174.567	245.14	215.837	473.5	405.22	481.155	396.43	813.407	471.089	77.9492	14.0464	85.7791	30.7367	122.082	46.9429	75.5377	878.592	27.1835	463.15	245.924	510.676	678.363	149.095	325.185	440.353	284.944	448.789	717.348	24.5339	0	6.1883	0.636142	0.408262	208.716	389.661	146.32	173.044	338.754
srna13175	GAGGTAGTAGGTTGCATAG	19	1	hsa-let-7d-5p:2-20(1)	0.417235	0	0.679835	0	0.65237	1.72001	4.68681	4.11863	2.38165	2.71548	5.65374	7.0122	7.091	5.12201	5.80003	4.6905	0	0.668875	2.60265	0	2.94174	0.733483	5.22752	5.31489	0	6.04788	2.43758	2.77919	4.20122	2.25902	2.81336	4.16475	2.5904	6.56965	5.55142	0	0	0	0.84819	0	2.03355	6.54206	3.47829	2.19217	5.03476
srna3603	GAGGTAGTAGGTTGCATAGT	20	1	hsa-let-7d-5p:2-21(1)	5.00682	6.11514	2.99127	0	2.82694	7.07114	16.4749	10.1382	9.3565	8.49681	29.5054	24.649	20.9976	21.4002	22.8969	16.2128	0	1.00331	6.61508	1.36608	9.70776	4.76764	12.0233	46.8119	7.76672	33.3609	19.7714	19.4543	23.6877	7.60933	12.3206	19.9908	6.1522	21.3514	29.145	0.817798	2.03259	0.386769	1.90843	2.04131	10.5375	19.2173	15.7682	6.4395	16.5292
srna2481	GAGGTAGTAGGTTGCATAGTT	21	1	hsa-let-7d-5p:2-22(1)	7.51023	1.74718	2.99127	0	2.60948	18.6016	28.1209	13.6232	14.8003	14.103	33.9224	22.949	31.2555	28.6272	56.2565	24.4722	3.54315	1.67219	7.26574	1.36608	10.0019	2.20045	4.96615	59.077	7.76672	35.3118	14.6255	34.045	41.744	8.67939	16.3951	33.0403	14.8948	19.5037	35.9108	2.45339	0	0	0.212047	0.204131	14.6046	25.9638	14.6088	11.2349	25.5538
srna45655	AGGTAGTAGGTTGCATAGT	19	1	hsa-let-7d-5p:3-21(1)	1.25171	0	0.815802	0	0.869826	0.254816	0.92316	0	0.170118	1.31394	3.35691	1.91242	2.20303	1.75411	1.3268	1.32558	0	0.334437	0.542219	0	0.588349	0.366741	0.261376	3.06628	0	1.36565	0.812525	0	1.25143	0.83227	0.679086	1.94355	0.3238	2.05302	1.9083	0	0	0	0.212047	0.204131	0.554605	1.22664	0.463772	0.548042	1.32994
srna34740	AGGTAGTAGGTTGCATAGTT	20	1	hsa-let-7d-5p:3-22(1)	1.25171	0.873592	0.135967	0	0.65237	2.03853	1.56227	1.26727	0.680472	0.700768	2.29683	1.48744	1.8588	3.15741	1.7438	1.22361	0	0	0.108444	0	0.294174	0.366741	0.261376	3.2707	0	1.75584	1.08337	1.38959	3.12857	0.594479	0.970123	0.83295	1.2952	1.84771	2.77571	0	0	0	0	0	0.554605	1.63551	0	0.411032	1.51993
srna16378	GGTAGTAGGTTGCATAGT	18	1	hsa-let-7d-5p:4-21(1)	3.75512	1.74718	2.58337	0	0.869826	1.5289	2.91151	2.21773	1.8713	1.75192	5.1237	3.61235	3.92414	4.06955	3.82878	3.87476	0	0.668875	2.06043	0	0.294174	1.46697	2.87514	10.0165	0	7.02334	2.97926	1.73699	5.09509	1.54565	3.00738	4.16475	1.619	6.15905	7.11276	0.817798	0	0.386769	0.84819	0.816525	1.10921	2.65771	1.85509	2.32918	4.2748
srna44423	AGCGGTAGTAGGTTGCATAGTT	22	1	hsa-let-7d-5p:4-22(1)	3.75512	0	1.2237	0	0.65237	0.191112	0.497086	0.316818	0.340236	0.262788	4.41698	5.09978	5.50757	5.12201	0.0379087	0	0	0	0	0.683038	0	0	0	0.613256	0	0.195093	0.270842	0.694797	0.268163	0	0	0	0	0	0	0.817798	0	0	0.212047	0	0.369737	1.0222	0	0.548042	0.569973
srna10880	GGTAGTAGGTTGCATAGTT	19	1	hsa-let-7d-5p:4-22(1)	2.50341	2.62078	1.49564	0	0.869826	4.45928	6.3201	2.21773	2.55177	3.06586	6.36045	3.18737	6.26486	5.40267	10.6903	4.6905	0	1.00331	1.51821	0.683038	1.47087	0.733483	1.56826	12.2651	3.88336	7.80371	2.43758	5.55838	9.47509	1.07006	3.29842	7.2189	3.5618	5.13254	9.54151	1.6356	0	0.386769	0.424095	0	2.03355	7.76869	2.55074	2.05516	5.69973
srna43519	GTAGTAGGTTGCATAGT	17	1	hsa-let-7d-5p:5-21(1)	2.50341	0	0.951769	0	0.217457	0.445928	0.639111	0.633636	0.680472	0.87596	2.82687	2.97487	1.58343	2.3856	1.17517	0.509837	0	0.668875	0.325332	0	0.294174	0.366741	1.30688	3.2707	0	1.95093	1.35421	1.0422	1.16204	0	0.485062	0.5553	0.3238	1.43711	2.25527	0	0	0	0.636142	0.204131	0.924342	1.83995	0	0	1.51993
srna33767	GTAGTAGGTTGCATAGTT	18	1	hsa-let-7d-5p:5-22(1)	1.25171	0	0.815802	0	1.08728	1.40149	1.1362	1.90091	0.510354	0.700768	1.06008	1.91242	2.89147	2.52593	2.00916	1.52951	0	0.334437	0.542219	1.36608	1.1767	0	0	3.2707	0	1.36565	0.270842	0.694797	1.87714	0.475583	1.06714	1.94355	0.3238	0.205302	2.08178	0	0	0	0.424095	0	0.369737	1.43107	1.15943	0.959074	2.27989
srna30538	TGAGGTAGGAGGTTGTAT	18	1	hsa-let-7e-5p:1-18(1)	0.417235	0	0.271934	0	0	3.63113	1.06519	1.26727	2.04142	1.31394	1.94347	0	0.688446	0	4.7765	0.611804	0	0	6.83196	0	0	0	0	3.67954	0	0.390186	0	1.0422	4.46938	0	0	2.49885	7.7712	4.92724	0.346964	0	0	0	0	0	1.10921	0.817757	0.231886	2.05516	1.61492
srna46507	TGAGGTAGGAGGTTGTATAAA	21	1	hsa-let-7e-5p:1-18(1)	23.3652	0	0	0	0	0.63704	0.284049	3.16818	0	1.31394	0	0	1.44574	0.701646	0.947718	1.42754	0	0	0	0	0	0	0	0	0	0	0	0	0.0893876	0	0	0	0	0.821207	2.94919	0	0	0	0	4.69502	5.91579	0.817757	3.71017	0.411032	0.949955
srna27242	TGAGGTAGGAGGTTGTATA	19	1	hsa-let-7e-5p:1-19(1)	0.417235	0	4.48691	0	0.217457	0.95556	7.24326	0.950454	0	0.43798	1.41343	2.3374	5.92064	2.03477	4.66277	1.01967	0	0.334437	0.108444	0	0	0	0	0	0	0	2.97926	6.25317	0.536326	0	0	0.83295	0.3238	9.64918	1.21437	0	0	2.32061	0.212047	0	7.94934	1.0222	0	0.822064	1.42493
srna4010	TGAGGTAGGAGGTTGTATAGTTT	23	1	hsa-let-7e-5p:1-20(1)	14.6032	0	9.92559	0	2.82694	32.3616	29.1861	7.60363	6.97484	12.0882	7.06717	4.24982	22.9253	6.66564	73.505	28.8568	0	0	3.03643	0	0	0	0	8.38117	0	3.51167	0.270842	15.2855	21.0955	0.713375	5.33568	8.60715	11.6568	0.615905	16.8278	0	0	0	0	1.63305	21.8145	10.0175	9.97109	3.15124	4.55979
srna46592	TGAGGTAGGAGGTTGTATAGTTTT	24	1	hsa-let-7e-5p:1-20(1)	0	0	0	0	0	3.88594	2.34341	0	0.340236	0.963556	0	0	0.413068	1.12263	3.82878	0	0	0	0	0	0	0	0	0	0	0	0	7.29537	6.70407	0	0	0	0	0	0	0	0	0	0	0	0	0.204439	0	0	0.379982
srna11055	TGAGGTAGGAGGTTGTATAGA	21	1	hsa-let-7e-5p:1-20(1)	12.5171	0	2.31144	0	5.21896	4.96891	10.5098	4.11863	0.170118	11.0371	0	7.43719	17.0735	4.49053	3.82878	5.60821	0	0	4.55464	0	0	0	0	1.83977	0	1.17056	0	4.86358	5.27387	0.951166	2.03726	0	0	3.69543	15.6134	0	0	2.32061	6.14938	4.89915	17.7474	12.0619	4.63772	3.42527	7.78963
srna6927	TGAGGTAGGAGGTTGTATAG	20	1	hsa-let-7e-5p:1-20(1)	14.6032	0.873592	12.7809	0	4.78404	13.8875	14.8416	6.33636	8.84614	12.789	12.8976	20.1866	21.2041	10.4545	10.6523	7.64755	0	0	0.867551	0.683038	0.588349	0	0	5.92814	0	0.975464	13.0004	0.694797	8.49182	0.237792	0.485062	8.60715	4.2094	3.90073	19.6035	0.817798	2.03259	12.3766	1.27228	8.16525	19.7809	21.875	12.5218	7.12455	7.21966
srna31541	TGAGGTAGGAGGTTGTATAGTA	22	1	hsa-let-7e-5p:1-21(1)	0	0	3.39917	0	0	1.40149	0.568099	0.633636	1.36094	2.1023	0.353358	0	6.54024	1.82428	4.73859	3.36492	0	0	0.108444	0	0	0	0	4.70163	0	0	0	1.0422	4.73754	0	0	0.27765	4.857	0.615905	12.3172	0	0	0	4.24095	0	0.369737	2.45327	1.15943	1.91815	0.949955
srna30851	TGAGGTAGGAGGTTGTATAGTTGT	24	1	hsa-let-7e-5p:1-21(1)	0	0	10.8774	0	0	3.88594	3.62163	1.26727	0	0.43798	0	0	3.8553	0	6.74775	3.97673	0	0	0	0	0	0	0	0	0	0	0	0.347398	0	0	0.873111	0	0	2.05302	0.86741	0	0	3.09415	0	0	3.69737	1.83995	0	0	1.32994
srna951	TGAGGTAGGAGGTTGTATAGT	21	1	hsa-let-7e-5p:1-21(1)	178.994	20.0926	112.717	7.39295	33.7058	131.103	126.047	83.0063	44.9112	106.342	73.4986	129.195	155.589	96.4763	195.799	92.1785	0	3.67881	19.6283	34.1519	8.23689	0	0	52.74	3.88336	28.8737	60.9394	21.5387	73.0297	7.01485	18.4323	39.9816	46.6272	92.1804	139.133	35.1653	0	29.7812	47.2866	31.0279	168.045	175.818	47.7685	26.7171	52.0575
srna18493	TGAGGTAGGAGGTTGTATAGTAA	23	1	hsa-let-7e-5p:1-21(1)	0	0	0	0	0	5.28743	3.55062	9.18772	0.170118	3.85422	9.89404	7.86217	3.57992	9.96337	2.42616	1.83541	0	0	5.53064	0	0	0	0	2.86186	0	0.780371	0	7.64277	3.39673	0	0	1.1106	23.6374	0.205302	2.08178	22.8983	0	0	1.90843	0	7.025	8.38201	2.55074	0	1.89991
srna3847	TGAGGTAGGAGGTTGTATAGTTA	23	1	hsa-let-7e-5p:1-22(1)	54.2406	13.9775	21.3468	0	1.30474	20.6401	26.6296	7.60363	8.50591	23.9137	24.7351	53.9727	39.3103	22.3825	38.0603	19.7817	49.6041	2.6755	0	0	5.29514	0	8.62541	7.97233	0	0	0	11.1168	12.3355	2.49681	4.17153	0.5553	27.8468	14.1658	18.9095	4.08899	0	7.34861	20.7806	8.77764	33.0915	39.0479	16.4639	1.37011	5.41474
srna17217	TGAGGTAGGAGGTTGTATAGTTAA	24	1	hsa-let-7e-5p:1-22(1)	26.703	0	0	0	0	4.14076	5.04188	2.21773	2.04142	4.3798	4.06362	10.837	8.12366	3.43806	8.83273	7.44362	0	0	0	0	0	0	0	0.204419	0	1.95093	0	0	3.84367	0	0.0970123	0	3.238	0	3.64312	0	0	0	0	0	2.9579	8.38201	2.78263	0	1.04495
srna23495	TGAGGTAGGAGGTTGTATAGTTG	23	1	hsa-let-7e-5p:1-22(1)	2.50341	0	5.43868	0	0	4.01335	3.97669	1.26727	0	0	0.176679	0	4.13068	4.3502	10.6903	2.03935	0	0	0	0	0	0	0	0	0	0	0	4.86358	0.0893876	0	0	0	1.2952	0	0	22.0805	0	0	0	10.819	3.69737	1.22664	0	0	1.70992
srna42056	TGAGGTAGGAGGTTGTATAGTTGA	24	1	hsa-let-7e-5p:1-22(1)	13.7688	0	3.53514	0	0	1.33778	3.40859	0	0	2.01471	0	2.54989	2.06534	2.94691	3.14642	2.85509	0	0	0	0	0	3.30067	0	0	0	0	0	0	1.25143	0	0	0	0	0	0	0	0	0	0	0	8.68882	2.04439	2.31886	0	0
srna682	TGAGGTAGGAGGTTGTATAGTT	22	1	hsa-let-7e-5p:1-22(1)	163.973	23.587	71.5186	0	31.0963	206.401	182.431	60.1954	38.4467	129.117	72.0851	137.482	148.291	115.701	409.376	171.713	24.802	9.69869	13.2302	15.7099	8.82523	11.7357	13.0688	100.37	0	27.8983	50.6474	38.2138	192.72	1.90233	27.0664	65.803	87.7498	115.174	185.973	12.267	0	33.2621	52.1637	20.8214	156.214	204.439	43.1308	17.2633	48.5427
srna38152	TGAGGTAGGAGGTTGTATAGTTC	23	1	hsa-let-7e-5p:1-22(1)	0	0	0	0	0	2.03853	0.994173	0	0	0.87596	0	0	1.03267	3.71872	6.48239	2.03935	3.54315	0	0	0	0	0	0	0	0	0	0.270842	0	2.77102	0	0	0	0	0	0.693928	0	0	0	0	0	0	2.45327	0.695658	0	0.0949955
srna41781	TGAGGTAGGAGATTGTATAGTT	22	2	hsa-let-7e-5p:1-22(1);hsa-let-7f-5p:1-22(1)	0	0	2.17547	0	1.5222	1.5926	2.13037	0.950454	0.510354	1.83952	0.883396	1.69993	2.40956	0.420988	1.66798	1.83541	0	0	0	0	0	0	0	2.04419	0	0.585278	0.270842	1.73699	2.23469	0.356687	0.291037	1.38825	0.6476	2.05302	0.86741	0.817798	2.03259	1.93384	0.424095	0.612393	0.739474	2.24883	0.463772	0.685053	1.13995
srna25978	GAGGTAGGAGGTTGTATAGT	20	1	hsa-let-7e-5p:2-21(1)	10.0136	0.873592	5.30271	0	1.30474	2.73927	2.41442	2.53454	0.850591	3.50384	1.41343	2.12491	3.78645	2.59609	5.42095	3.36492	0	0.334437	0.759107	0.683038	0.294174	0	0	1.02209	0	0.780371	1.08337	0.694797	1.96653	0.118896	0.485062	0.27765	0.6476	2.87422	2.77571	0	0	1.54708	2.54457	1.22479	4.62171	5.7243	1.85509	0.137011	0.85496
srna17601	GAGGTAGGAGGTTGTATAGTT	21	1	hsa-let-7e-5p:2-22(1)	7.51023	1.74718	3.67111	0	1.5222	6.05188	5.04188	2.53454	1.36094	3.94182	2.12015	3.39986	4.75028	3.99938	12.472	5.91411	0	0.668875	0.759107	0	0.294174	0.366741	0.261376	2.65744	0	0.780371	1.62505	0.694797	4.55877	0	0.776098	0.27765	1.9428	2.05302	4.33705	0.817798	0	2.32061	2.96866	2.24544	3.14276	4.49766	2.08697	0.411032	0.759964
srna38911	CTATACAATCTATTGCCTTCC	21	1	hsa-let-7f-1-3p:1-21(1)	0	0	0	0	0	0.254816	1.49126	3.485	3.57248	3.41624	0.176679	0	0.89498	3.43806	1.7438	3.77279	0	0	0	0	0	0	0	0	0	0	0	0	0.625713	7.25264	0	1.94355	0	0	1.73482	0	0	0	0	0	3.69737	2.04439	5.56526	3.69929	2.46988
srna31471	CTATACAATCTATTGCCTTCCT	22	1	hsa-let-7f-1-3p:1-21(1)	0	0	0	0	0	5.09632	2.34341	0	1.8713	3.67903	1.59011	0	1.17036	0.91214	4.85232	1.73345	0	0.334437	0	0	0	0	0	0	0	0	0	4.51618	2.94979	0	0	4.16475	0	0	0	0	0	0	0	0	4.99145	4.7021	2.31886	0.548042	0.759964
srna5041	CTATACAGTCTACTGTCTTTCT	22	1	hsa-let-7f-2-3p:1-21(1)	0	0	9.92559	0	0	16.1808	11.8591	5.06909	3.91272	9.28518	3.00355	0.637473	7.57291	6.7358	25.0956	8.25936	0	4.34769	13.1217	18.442	7.35436	14.3029	1.0455	8.58559	0	7.41353	16.2505	9.72716	16.4473	7.84712	12.3206	26.0991	27.1992	5.54314	23.5936	0	0	9.28245	0	4.49089	12.7559	8.17757	7.88412	2.05516	4.08481
srna30905	CTATACAATCTACTGTCTTTCC	22	1	hsa-let-7f-2-3p:1-22(1)	15.8549	0	0	0	0	3.1852	2.84049	0	2.38165	0	4.77034	0	3.64876	0	1.51635	2.03935	0	0	0	0	0	0	0	0	0	0	0	6.60057	3.03918	0	1.26116	11.6613	0	5.74845	0	0	0	0	0	0	2.9579	1.63551	0	0	0
srna5883	TGAGGTAGTAGATTG	15	1	hsa-let-7f-5p:1-15(1)	1.25171	0	6.52642	0	0.434913	14.9704	18.1081	7.28681	9.86685	28.3811	11.8375	5.94975	10.3955	10.1739	11.9792	11.6243	0	3.34437	0	0	0	0	0.261376	23.7126	0	6.63316	15.438	17.0225	17.073	7.84712	3.00738	1.94355	1.619	11.0863	19.43	0	0	6.1883	4.24095	13.4727	15.3441	19.4217	7.65223	4.65836	6.17471
srna44772	TGAGGTAGTAGATTGTCTAG	20	1	hsa-let-7f-5p:1-16(1)	1.25171	0	2.85531	0	2.39202	0.31852	0.92316	0.316818	0.170118	0.43798	0.353358	0.424982	0.963825	0.350823	0	0.101967	0	0	0	0	0	0	0	6.33698	0	4.48714	0.541683	2.43179	4.02244	0	0.291037	0.27765	0.3238	0.821207	0.173482	0	2.03259	1.93384	1.06024	0.816525	0.739474	0	0.927544	0	0.189991
srna11454	TGAGGTAGTAGATTGT	16	1	hsa-let-7f-5p:1-16(1)	0.417235	1.74718	5.57465	0	6.30624	5.47854	6.39111	2.85136	1.70118	6.13172	16.0778	9.13711	4.88797	5.05185	3.82878	3.36492	0	0.668875	0.216888	0	0	0	0.261376	13.6961	0	5.26751	2.97926	4.86358	11.9779	0.951166	2.91037	4.9977	3.238	8.62267	4.8575	2.45339	0	2.32061	2.33252	4.69502	3.32763	4.49766	3.94206	2.19217	1.89991
srna37610	TGAGGTAGTAGATTGTAGAGT	21	1	hsa-let-7f-5p:1-17(1)	0	0	0	0	0	0.382224	0.568099	0.633636	0.510354	0.788364	3.00355	2.12491	2.34072	1.89444	1.25099	1.63148	0	0	0.216888	0	0	0	0.261376	0	0	0.195093	0	0	0	0.475583	1.06714	3.05415	2.5904	7.39086	8.32714	0	0	0	0	0	1.10921	0.613318	0.231886	0.274021	0.474978
srna27707	TGAGGTAGTAGATTGTAAAGT	21	1	hsa-let-7f-5p:1-17(1)	0	0	0	0	0.434913	1.33778	1.84632	0.633636	1.02071	1.40154	3.71026	2.54989	5.0945	2.87675	3.41178	3.36492	0	0.334437	0.216888	0	0	0	0	0.613256	0	0.195093	0.270842	0	0.268163	0.713375	0.970123	3.8871	3.8856	6.98026	6.07187	0	0	0.386769	0.212047	0	2.03355	1.83995	0.695658	0.685053	0.569973
srna40523	TGAGGTAGTAGATTGTAAA	19	1	hsa-let-7f-5p:1-17(1)	0	1.74718	1.35967	0	3.04439	1.5926	1.84632	1.58409	1.8713	0.963556	0.176679	11.4745	4.4749	0.140329	1.3268	2.14132	0	0	0	0	0	0	0	0	0	0	0	0	0.0893876	0	0	2.7765	0	0.205302	4.16357	5.72459	0	6.1883	0	0	3.32763	0.408878	1.6232	0	0
srna4532	TGAGGTAGTAGATTGTA	17	1	hsa-let-7f-5p:1-17(1)	0.417235	0	8.56592	0	6.74115	14.3971	22.866	12.3559	3.7426	16.6432	16.9612	25.4989	24.5087	9.75288	18.6132	24.3702	0	10.3676	5.74753	0	10.0019	0.366741	0.784128	20.033	3.88336	8.38899	4.87515	16.6751	11.9779	3.80466	3.10439	12.7719	11.333	13.5499	27.0632	12.267	2.03259	3.09415	14.2072	1.22479	20.3355	17.7862	20.6378	10.9608	5.69973
srna23742	TGAGGTAGTAGATTGTATAAA	21	1	hsa-let-7f-5p:1-18(1)	7.093	0	3.26321	0	0	1.5289	7.24326	4.43545	2.21154	2.62788	0.176679	2.76238	9.29402	3.3679	2.1608	3.97673	0	1.33775	0	0	0	0	0	2.24861	0	0	0	0.347398	0.536326	0	0	3.05415	0	0	1.21437	0	0	0	0	0	8.31908	0.204439	1.85509	0.959074	3.13485
srna3851	TGAGGTAGTAGATTGTAT	18	1	hsa-let-7f-5p:1-18(1)	5.84129	0	6.11851	0	3.91422	17.5186	24.2862	12.6727	6.46449	17.9572	23.3217	25.0739	37.7957	19.5058	22.2903	26.4096	3.54315	1.67219	2.92798	0.683038	0.882523	0	2.35238	23.0993	0	6.63316	7.58357	11.1168	29.5873	7.60933	5.43269	13.0495	16.5138	22.3779	33.3085	1.6356	0	9.28245	2.54457	12.8603	23.6632	29.4392	20.1741	7.39857	9.02457
srna41794	TGAGGTAGTAGATTGTATAATT	22	1	hsa-let-7f-5p:1-19(1)	0.417235	0	0.407901	0	0.217457	0.509632	0.639111	0.633636	0	0.175192	6.18377	6.16224	5.85179	3.85905	2.1608	1.22361	0	0	0	0	0	0	0	0.408837	0	0	0.270842	0	0.268163	0	0	0	0	0	0.520446	0	0	0.386769	0	0	0.369737	0.613318	0.695658	0	0.0949955
srna466	TGAGGTAGTAGATTGTATA	19	1	hsa-let-7f-5p:1-19(1)	125.588	34.9437	103.471	0	35.8803	107.086	293.849	125.46	97.6478	190.959	251.061	354.648	544.079	251.821	188.672	256.448	0	10.702	16.9172	0.683038	18.2388	13.5694	30.3196	255.932	11.6501	87.4016	93.1696	200.449	207.916	22.4713	29.2007	141.879	144.415	485.128	374.548	38.4365	4.06519	62.6566	70.3997	64.5054	286.731	159.667	265.509	119.199	84.736
srna22614	TGAGGTAGTAGATTGTATAA	20	1	hsa-let-7f-5p:1-19(1)	0	0	2.31144	0	0	4.01335	3.76365	4.43545	1.02071	5.69374	0.883396	16.9993	4.54374	2.45576	2.31243	1.63148	0	0	0	0	2.64757	0	0	0	0	0	1.62505	0	2.50285	0	0	1.6659	0	10.881	3.99009	15.5382	0	1.16031	4.87709	0	10.1678	1.43107	2.08697	0.137011	1.32994
srna19534	TGAGTTAGTAGATTGTATAG	20	1	hsa-let-7f-5p:1-20(1)	9.59641	1.74718	11.0133	0	5.21896	2.73927	5.32593	1.58409	1.70118	3.85422	9.18732	10.837	14.7327	7.78827	0.0379087	0	0	0	0.542219	1.36608	0.588349	0	1.56826	0.204419	0	0.195093	0	0	0	0	0	0	0	0	0	2.45339	4.06519	5.028	2.12047	4.69502	3.5125	3.88435	3.71017	1.2331	2.27989
srna39450	TGAGGTAGTAGATTGTATAGAA	22	1	hsa-let-7f-5p:1-20(1)	0	0	0	0	0	0	2.62746	0	0.680472	1.31394	4.06362	0.849964	6.88446	2.10494	2.42616	1.01967	0	0	0	0	0	0	0	3.47512	0	0	0	0	2.1453	0	0.776098	0	0	0	2.94919	0	0	0.386769	5.51323	0	3.5125	0.613318	3.01452	0	1.70992
srna291	TGAGGTAGTAGATTGTATAG	20	1	hsa-let-7f-5p:1-20(1)	195.683	24.4606	239.982	7.39295	117.644	235.323	593.45	240.782	208.395	364.487	724.738	817.241	873.294	481.259	336.023	540.835	24.802	29.4305	10.4106	23.2233	23.534	4.76764	17.5122	491.423	7.76672	156.074	95.0655	224.767	325.103	56.8322	48.1181	275.429	201.08	520.645	561.041	89.9578	18.2934	138.077	78.8816	107.169	358.46	483.703	449.627	173.592	231.409
srna23144	TGAGGTAGTAGATTGTATAGTTTT	24	1	hsa-let-7f-5p:1-20(1)	0	0	0.543868	0	0	6.4341	7.95338	0.950454	0.510354	1.31394	1.06008	0.849964	3.57992	3.71872	5.61049	2.65115	0	0	0	0	0	0	0	0	0	0.390186	0	5.90577	4.73754	0.118896	0.291037	0.27765	0.3238	0	0.86741	0	0	0.773538	0	0	1.29408	4.7021	1.6232	0.137011	0.664969
srna42875	TGAGGTAGTCGATTGTATAG	20	1	hsa-let-7f-5p:1-20(1)	3.75512	0.873592	3.80708	0	1.95711	4.01335	8.66351	3.80182	2.55177	4.64259	0.176679	0.849964	0.137689	0.140329	0	0.203935	0	0	0	0	0	0	0	0	0	0	0	0	0.268163	0	0.0970123	0	0.6476	0.410603	1.21437	3.27119	2.03259	2.70738	1.90843	2.44957	6.28553	6.13318	6.72469	5.2064	2.27989
srna170	TGAGGTAGTAGATTGTATAGTTT	23	1	hsa-let-7f-5p:1-20(1)	236.572	22.7134	120.875	0	84.3731	1504.5	1633.43	505.008	335.813	575.418	575.444	729.694	833.708	469.752	1364.56	777.094	14.1726	181.265	4.12087	0	10.0019	0.733483	15.9439	442.158	31.0669	81.939	55.7934	375.885	980.314	20.4501	60.0506	254.05	284.62	334.642	694.622	29.4407	75.206	254.494	5.72528	142.484	846.513	647.663	848.702	135.092	224.949
srna14347	TGAGGTAGTAGATTGTATAGG	21	1	hsa-let-7f-5p:1-20(1)	2.92065	0.873592	0.951769	7.39295	0.869826	2.48446	4.89985	2.53454	3.57248	3.94182	6.36045	5.94975	6.19602	3.15741	4.89022	7.13772	0	0.334437	0.108444	0	0.294174	0	0	10.2209	7.76672	4.09695	1.89589	6.25317	5.81019	0.594479	0.582074	4.4424	3.238	6.56965	10.5824	0.817798	2.03259	0.773538	0	0.816525	3.88224	4.90654	6.4928	1.78114	2.75487
srna2722	TGAGGTAGTAGATTGTATAGA	21	1	hsa-let-7f-5p:1-20(1)	71.3472	0	13.8686	0	0.217457	21.9779	63.414	15.5241	8.84614	35.3012	23.4983	37.3984	62.4421	24.6979	21.8733	18.2522	0	0	5.53064	0	0.294174	0	2.35238	19.2154	0	10.3399	10.8337	18.7595	22.5257	0	1.35817	9.16245	17.809	35.7225	65.0558	0.817798	0	10.4428	6.36142	8.16525	51.3934	14.3107	46.8409	5.34341	11.6844
srna19579	ATGAGGTAGTAGATTGTATAGT	22	1	hsa-let-7f-5p:1-21(1)	0	0	4.21498	0	0	2.03853	3.69264	5.3859	4.08283	2.1899	3.35691	11.687	7.22868	7.08662	3.0327	2.75312	0	0	3.68709	0	0	0	0	8.99442	0	0	0	15.2855	5.89958	0	0	0	0	2.25832	0.86741	0	0	0	0	0	0.739474	1.83995	2.55074	1.64413	2.0899
srna27774	CTGAGGTAGTAGATTGTATAGT	22	1	hsa-let-7f-5p:1-21(1)	0	0	0	0	0	2.22964	3.26657	0	4.08283	4.20461	1.76679	3.61235	4.68143	5.19218	2.69152	5.20034	0	0	0	0	0	0	0	1.83977	0	1.75584	0	0	2.8604	0.237792	0	0	2.5904	0	5.20446	0	0	0.386769	0	0	1.66382	0	1.15943	0	0
srna27280	TGAGGTAGTAGATTGAATAGT	21	1	hsa-let-7f-5p:1-21(1)	0	0	0.543868	0	0.65237	0.891856	0.92316	0	1.02071	0.613172	1.41343	2.54989	2.47841	1.61379	3.60133	4.18066	0	18.7285	0	0	0	0	0	5.72372	0	1.17056	0.541683	2.43179	4.64816	0.713375	0.776098	3.3318	3.5618	5.95375	5.55142	0	0	0.386769	0.212047	0.204131	0.924342	0.408878	1.6232	0.274021	0.379982
srna35405	TGAGGTAGTAGAATGTATAGT	21	1	hsa-let-7f-5p:1-21(1)	0	0	0.407901	0	0	0.891856	2.05936	0.950454	0.850591	1.22634	6.00709	7.0122	7.29753	3.78889	2.04707	4.18066	0	0	0	0	0	0	0	0.817675	0	0.195093	0	0.694797	0.178775	0	0.194025	1.1106	0	0.615905	0.693928	0	0	0	0	0	1.47895	1.43107	1.15943	0.685053	0.759964
srna28724	TGAGGTGGTAGATTGTATAGT	21	1	hsa-let-7f-5p:1-21(1)	1.25171	0.873592	0.543868	0	0.434913	2.86668	6.53314	2.21773	2.72189	3.76663	1.76679	1.69993	1.65227	1.47346	0.644448	1.12164	0	0	0	0	0.294174	0	0.522752	4.08837	0	0.975464	0.270842	2.77919	1.60898	0	0.388049	1.38825	0.9714	3.07952	2.60223	0.817798	0	1.16031	0.636142	0.816525	3.32763	5.92874	6.72469	2.19217	2.84987
srna3643	TGAGTTAGTAGATTGTATAGT	21	1	hsa-let-7f-5p:1-21(1)	89.2883	36.6909	88.2426	0	81.5462	11.8489	27.4108	10.7718	12.2485	16.0301	50.3536	64.5973	71.323	42.2391	0.151635	0.305902	0	0	6.83196	4.09823	5.88349	2.20045	12.0233	0.408837	0	0.195093	0	0	0.35755	0	0	0	0	0	0.173482	31.0763	12.1956	76.1935	35.624	51.8493	14.9743	17.3773	22.261	6.98754	10.3545
srna15918	TGAGGTAGTAGATTGTATAGTTAT	24	1	hsa-let-7f-5p:1-21(1)	0	0	0	0	0	6.49781	4.54479	0.950454	0.850591	0.963556	5.65374	4.6748	4.40606	0.91214	8.22619	5.60821	0	3.34437	0	0	0	0	0	2.65744	0	0.195093	0	6.94797	3.39673	0	0	0.27765	0.3238	1.02651	4.8575	0	0	0	0	0	4.43684	2.86215	0.463772	0.137011	0.0949955
srna39797	TGAGGTAGTAGAGTGTATAGT	21	1	hsa-let-7f-5p:1-21(1)	0.417235	0	0	0	0.434913	0.509632	1.42025	0.316818	1.02071	0.788364	6.36045	5.09978	8.81211	4.20988	1.17517	1.12164	0	0	0.108444	0	0	0	0.522752	0.204419	0	0	0	0	0.0893876	0	0	0	0	0.205302	0.173482	0	0	0	0	0.204131	0.739474	1.0222	2.08697	0.411032	0.474978
srna24	TGAGGTAGTAGATTGTATAGT	21	1	hsa-let-7f-5p:1-21(1)	2822.6	787.98	2567.46	22.1789	2337.22	4590.38	10379.7	4602.1	4194.09	5960.56	11879.4	12461.5	13900.1	7966.35	5709.58	8693.33	170.071	376.242	244.216	239.746	267.993	121.758	504.717	13647.6	100.967	3969.75	2203.3	5736.94	7514.73	965.671	1020.96	5666.83	4377.45	11418.5	10989	868.501	552.866	2223.92	966.3	1623.86	7143.32	7841.68	9454.68	3485.69	4358.96
srna28551	TGAGGTAGTAGATTGTATAGTG	22	1	hsa-let-7f-5p:1-21(1)	1.25171	1.74718	0.951769	0	0.217457	2.35705	2.76948	0.316818	0.680472	0.963556	2.29683	1.27495	4.54374	3.08724	4.3595	2.95705	0	0	0	0	0.294174	0	0	3.2707	0	0.975464	0.270842	0	4.73754	0.237792	0.388049	1.94355	0.3238	1.84771	2.60223	0	0	1.16031	0.636142	0.816525	2.03355	1.0222	1.39132	0.548042	1.89991
srna38082	TGAGGTAGAAGATTGTATAGT	21	1	hsa-let-7f-5p:1-21(1)	3.75512	0	2.58337	0	2.39202	0.828152	2.27239	0.633636	0.850591	1.05115	1.23675	1.27495	1.99649	0.91214	0.492813	1.52951	0	0	0	0	0	0	0	5.11047	0	1.56074	0.270842	2.43179	2.05591	0.118896	0.194025	0.83295	0.3238	3.28483	2.60223	1.6356	0	3.09415	1.27228	2.24544	1.10921	1.43107	1.6232	0.411032	0.569973
srna22605	TGAGGTAGTAGATTATATAGT	21	1	hsa-let-7f-5p:1-21(1)	0.417235	0	1.6316	0	0.65237	0.891856	0.852148	0.633636	0.340236	0.788364	4.2403	2.97487	5.7141	2.10494	0.530722	0.815739	0	0	0.216888	0	0	0	0.522752	7.35907	0	2.53621	2.43758	3.12659	6.25713	0.594479	0.485062	2.49885	1.9428	8.00676	6.41883	0	0	2.70738	0	0.408262	1.29408	0.408878	0.927544	0.822064	0.189991
srna14053	TGAGGTAGTAGATTGTATAGTAA	23	1	hsa-let-7f-5p:1-21(1)	2.08618	0	0.135967	0	1.95711	2.99409	4.75783	4.43545	0	7.53326	8.4806	14.8744	10.7398	6.17448	0.833992	4.28263	0	0	0	0	0	0	0	5.51931	0	0	0	0.347398	3.93305	0.83227	0	14.1601	0	13.9605	16.1338	0	0	0	0.212047	0	7.39474	4.08878	1.15943	2.87722	1.23494
srna42382	TGAGGTAGCAGATTGTATAGT	21	1	hsa-let-7f-5p:1-21(1)	1.25171	0	0.543868	0	1.30474	0.828152	3.19556	1.58409	0.170118	0.525576	1.59011	2.3374	2.6161	1.1928	0.720266	1.12164	0	0	0	0	0	0	0	2.45302	0	0.585278	0.270842	0.347398	1.4302	0.118896	0.388049	2.2212	0.3238	2.05302	2.08178	0	0	0	0.212047	1.02066	0.184868	1.43107	1.85509	1.09608	1.04495
srna25569	TGAGGTAGTAGATTGGATAGT	21	1	hsa-let-7f-5p:1-21(1)	0.417235	0	0.135967	0	0.217457	0.31852	0.426074	0.316818	0.170118	0.262788	3.18023	1.69993	2.89147	1.1928	3.22224	4.28263	0	0.334437	0	0	0	0	0	11.8563	0	2.7313	1.35421	3.12659	3.48612	1.07006	0.776098	3.3318	1.9428	9.23857	5.72491	0	0	0	0	0.204131	0.369737	0.613318	0.463772	0	0.0949955
srna1297	TGAGGTAGTAGATTGTATAGTA	22	1	hsa-let-7f-5p:1-21(1)	15.0205	0	33.04	0	12.1776	35.5468	85.4278	48.1563	28.75	71.3031	79.6823	113.47	136.175	80.6893	44.3153	55.8781	0	6.01987	11.6035	0	0.882523	0	11.7619	65.0052	3.88336	18.1436	8.12525	38.9086	56.493	0.951166	7.0819	56.6406	29.4658	108.605	114.498	0.817798	0	22.8194	28.4144	0.204131	92.0645	57.8563	70.0295	10.6868	28.2137
srna4828	TGAGGTAGTAGATTGTCTAGT	21	1	hsa-let-7f-5p:1-21(1)	12.0998	2.62078	9.92559	0	11.3077	2.10223	6.10706	2.53454	2.55177	3.24105	1.76679	2.97487	1.37689	0.982304	0	0.40787	0	0	0	0	0	0	0	105.071	0	34.5314	22.4799	44.8144	66.5044	0.118896	0.679086	2.49885	1.9428	2.05302	2.77571	2.45339	6.09778	5.80153	3.81685	6.12393	4.99145	3.88435	5.33338	1.50712	2.46988
srna31653	TGAGGTAGTGGATTGTATAGT	21	1	hsa-let-7f-5p:1-21(1)	1.66894	0	0.815802	0	0.869826	1.40149	8.16642	4.11863	2.72189	3.85422	1.94347	1.69993	1.92765	0.350823	1.78171	1.83541	0	0.668875	0.433775	0	0	0	0.522752	4.49721	0	1.95093	0.541683	0.694797	2.23469	0.118896	0.388049	1.1106	0.6476	1.02651	1.04089	0.817798	2.03259	0.773538	0.424095	0.612393	2.40329	5.7243	5.33338	2.05516	1.89991
srna2985	TGAGGTAGTCGATTGTATAGT	21	1	hsa-let-7f-5p:1-21(1)	45.0614	18.3454	46.2288	0	39.3596	76.827	151.753	65.8981	72.4703	83.3914	1.06008	0.849964	1.17036	0.631481	0.341178	0.917707	0	0.334437	0.108444	0	0	0	0.522752	0.204419	0	0.195093	0	0	0.268163	0.951166	1.06714	6.38595	5.8284	10.4704	17.0012	11.4492	12.1956	41.771	20.3566	31.2321	116.837	99.153	188.523	70.2864	62.2221
srna25261	TGAGGTAGTAGATTGTGTAGT	21	1	hsa-let-7f-5p:1-21(1)	0	0	0.271934	0	0	2.03853	3.40859	1.26727	1.8713	2.1023	0.706717	0.849964	1.30805	0.982304	0.416996	0.917707	0	0	0	0	0	0	0.261376	13.2872	0	3.70676	2.70842	5.21098	6.25713	0.356687	0.679086	1.1106	2.9142	5.74845	4.68401	0	0	0	0	0	2.58816	3.06659	3.94206	1.37011	1.70992
srna28819	TGAGGTAGTAAATTGTATAGT	21	1	hsa-let-7f-5p:1-21(1)	0.83447	0	0.679835	0	0.217457	4.07706	10.4388	1.90091	3.40236	6.39451	1.59011	1.69993	1.8588	1.1928	1.3268	2.24328	0	0	0.108444	0.683038	0.294174	0	0.261376	0.408837	0	0	0	0	0.268163	0.356687	0.388049	0.83295	0.9714	5.13254	3.29616	0	0	0	0.212047	0.408262	7.20987	9.4042	9.50732	2.32918	4.55979
srna22475	TGAGGGAGTAGATTGTATAGT	21	1	hsa-let-7f-5p:1-21(1)	1.66894	0.873592	0.543868	0	0	0.509632	5.53896	1.90091	1.70118	2.1899	3.00355	3.18737	6.3337	3.50823	1.81962	3.05902	0	0.334437	0.325332	0	0	0	0	1.43093	0	0.780371	0.541683	2.08439	2.94979	0.237792	0.970123	3.60945	3.238	7.59616	10.062	0	0	0	0.212047	0.204131	1.47895	4.49766	4.40583	2.05516	1.61492
srna24561	TGAGGTAGTAGATTGCATAGT	21	1	hsa-let-7f-5p:1-21(1)	0.83447	0	0.271934	0	0.434913	1.33778	3.69264	1.58409	2.04142	2.36509	2.29683	5.73726	3.64876	1.40329	2.69152	3.05902	0	0.334437	0	0	0	0	0	5.92814	0	1.95093	0.812525	3.12659	3.93305	0.713375	0.582074	1.6659	1.2952	4.10603	5.20446	0	0	1.54708	0	0.204131	1.66382	3.47547	4.17395	0.822064	1.32994
srna39558	TGAGGTAGTAGATTTTATAGT	21	1	hsa-let-7f-5p:1-21(1)	2.50341	1.74718	1.49564	0	1.08728	0.573336	1.1362	0	0.510354	0.087596	1.23675	1.48744	0.963825	0.701646	0.0379087	0.101967	0	0	0	0	0	0	0	10.8342	0	2.53621	1.08337	4.86358	5.00571	0.118896	0	0.5553	0.6476	0.410603	0.693928	0.817798	2.03259	1.93384	0.424095	1.02066	0.369737	0.613318	1.6232	0.685053	0.759964
srna31456	TGAGGAAGTAGATTGTATAGT	21	1	hsa-let-7f-5p:1-21(1)	1.25171	0	0.271934	0	0.65237	0.509632	1.49126	0.316818	0	0.700768	1.76679	4.6748	3.71761	3.01708	1.55426	2.95705	0	0.668875	0	0	0	0.366741	0	1.02209	0	1.36565	0.812525	1.0422	1.25143	0.356687	0.776098	4.16475	2.2666	6.98026	7.63321	0	0	1.54708	0.212047	1.02066	0.554605	0.408878	2.31886	0.685053	0.0949955
srna8447	TGAGGTCGTAGATTGTATAGT	21	1	hsa-let-7f-5p:1-21(1)	3.33788	0	0.951769	0	2.82694	25.7364	51.91	26.2959	20.5843	31.7098	3.88694	5.73726	7.98597	3.3679	0.113726	0.101967	0	0	0	0	0	0	0	0.817675	0	0.195093	0	0	0.536326	0.118896	0	0	0.6476	0.615905	0.86741	3.27119	0	1.54708	0.636142	1.63305	34.2007	39.0479	49.1598	15.7562	22.3239
srna28038	TGAGGCAGTAGATTGTATAGT	21	1	hsa-let-7f-5p:1-21(1)	0	0	0.135967	0	0.869826	1.21038	5.04188	1.90091	1.70118	2.01471	4.59366	4.46231	3.64876	2.80658	2.12289	3.67083	0	0.334437	0.108444	0.683038	0	0.366741	0	1.83977	0	1.56074	0.541683	1.73699	1.96653	0.237792	0.291037	1.6659	0.9714	3.49013	3.64312	0	0	0.773538	0.424095	0.408262	2.58816	2.04439	5.79715	1.64413	2.56488
srna33118	TGAGGTAATAGATTGTATAGTT	22	1	hsa-let-7f-5p:1-22(1)	0.417235	0	0.679835	0	0.65237	3.31261	4.11872	2.21773	1.02071	2.01471	1.06008	1.06246	2.47841	0.491152	7.80919	6.42395	0	0.334437	0	0	0	0	0	2.24861	0	0	0	1.0422	1.51959	0	0.388049	1.38825	0	1.23181	2.25527	0	0	0.773538	0	0.204131	2.40329	3.67991	1.85509	0.685053	1.13995
srna45518	TNAGGTAGTAGATTGTATAGTT	22	1	hsa-let-7f-5p:1-22(1)	0	0	0	0	0	1.08297	2.48543	0.316818	1.19083	1.05115	1.94347	1.91242	1.8588	1.12263	3.71505	3.16099	0	0	0	0	0	0	0	2.65744	0	0.585278	0	0.347398	1.60898	0.118896	0.0970123	0.27765	1.2952	0.821207	1.38786	0	0	0	0	0	0.924342	1.22664	0.463772	0.274021	0.664969
srna24296	TGAGGTAGTAGAATGTATAGTT	22	1	hsa-let-7f-5p:1-22(1)	0.417235	0	0.271934	0	0.434913	3.50372	4.11872	1.58409	1.02071	1.40154	7.59721	7.2247	8.9498	4.3502	6.33076	5.40427	0	0	0	0	0	0	0.522752	0.408837	3.88336	0.585278	0	0	0.35755	0	0	0	0	0.410603	0.520446	0	0	0.773538	0	0.408262	2.77303	2.65771	1.6232	0.548042	0.474978
srna21269	TGAGGTAGTAGATTGAATAGTT	22	1	hsa-let-7f-5p:1-22(1)	0.83447	0	0.951769	0	0.217457	3.63113	1.63328	0.316818	1.02071	0.87596	2.29683	1.69993	2.75378	0.982304	9.96999	6.01608	0	38.1259	0	0	0	0	0	6.13256	0	0.585278	2.16673	3.82138	5.09509	0.475583	0.388049	0.5553	1.619	2.05302	3.8166	0	0	0.386769	0	0.408262	0.554605	1.43107	1.85509	0	0.569973
srna22904	ATGAGGTAGTAGATTGTATAGTT	23	1	hsa-let-7f-5p:1-22(1)	0	0	2.0395	0	0	3.69483	4.18973	0	0	3.24105	1.59011	0.424982	7.02215	0.0701646	9.51509	5.81214	0	0.334437	0	0	0	0	0	0.613256	0	0	0	0	3.75428	3.92356	0.194025	0	0	0	5.37794	0	0	0	0	0	4.06711	0	1.39132	0.411032	4.2748
srna20266	TGAGGCAGTAGATTGTATAGTT	22	1	hsa-let-7f-5p:1-22(1)	0.83447	0.873592	1.08774	0	0.65237	3.44002	9.65768	5.70272	3.91272	6.13172	3.35691	6.16224	4.26837	4.06955	5.15558	4.6905	0	0	0.108444	0	0.294174	0.366741	0.261376	2.04419	3.88336	0.390186	0.270842	1.38959	2.77102	0	0.291037	3.05415	0.9714	2.46362	2.77571	0.817798	0	1.54708	0.424095	0.408262	3.32763	7.56425	7.42035	1.37011	2.84987
srna28893	TGAGGTAGTAGAGTGTATAGTT	22	1	hsa-let-7f-5p:1-22(1)	0.83447	0	0.407901	0	0.434913	1.91112	2.55644	0.316818	1.02071	1.22634	6.89049	7.86217	7.84829	4.63086	3.82878	3.67083	0	0	0.216888	0	0	0	0	0	0	0	0	0	0	0	0	0	0	0	0	0	0	0	0	0	1.29408	1.83995	1.85509	0.274021	0.379982
srna20	TGAGGTAGTAGATTGTATAGTT	22	1	hsa-let-7f-5p:1-22(1)	4554.12	860.488	3764.93	22.1789	2912.61	12658.4	18040.3	6877.8	6687.85	9014.15	14746.4	15693.1	16235.3	9472.08	15551.2	12579.2	513.756	507.342	161.581	94.2592	226.809	111.856	288.298	10294.1	485.42	2616.39	1323.6	4105.55	7979.81	641.799	844.589	3983.44	2956.29	6448.93	9033.21	1274.13	674.821	3140.18	1052.6	1503.63	10817.9	12545	12072	3540.22	5859.04
srna2371	TGAGGTAGTAGATTGTATAGTTG	23	1	hsa-let-7f-5p:1-22(1)	18.7756	0	21.2109	0	25.8773	29.6224	53.1172	28.5136	11.3979	21.461	63.7812	78.1967	83.5085	41.2568	34.042	37.524	0	8.36094	0	0	0	0	0.261376	51.3091	0	16.5829	0.541683	5.21098	21.7212	1.18896	3.00738	16.1037	28.8182	23.1991	48.7484	0.817798	0	23.9797	25.2336	31.6403	33.6461	27.8037	44.2902	11.9199	16.6242
srna2731	TGAGTTAGTAGATTGTATAGTT	22	1	hsa-let-7f-5p:1-22(1)	153.543	33.1965	128.625	0	105.249	33.8268	50.1347	18.6923	18.8831	24.3517	59.0109	76.4968	75.9356	43.7125	0.644448	0.305902	0	0	4.4462	2.04911	4.41262	1.83371	7.84128	0.613256	0	0	0	0.347398	0.178775	0	0	0	0	0.205302	0	41.7077	20.3259	107.135	31.171	54.7072	29.2092	34.7547	37.1017	11.3719	15.0093
srna23098	TGAGGTAGTGGATTGTATAGTT	22	1	hsa-let-7f-5p:1-22(1)	1.66894	0	1.2237	0	0.869826	7.07114	11.575	6.33636	3.06213	5.25576	1.94347	1.69993	2.82263	1.33313	3.86669	4.28263	0	0.334437	0.108444	0	0.294174	0	0.261376	2.86186	0	0.390186	0.812525	0	2.77102	0	0.0970123	0.5553	0	0.821207	1.56134	0.817798	0	0.386769	0.636142	0.408262	6.28553	6.74649	5.79715	2.19217	3.89482
srna18320	TGAGGTAGTAGATTGCATAGTT	22	1	hsa-let-7f-5p:1-22(1)	7.093	0	1.08774	0	0.65237	4.39558	8.66351	1.90091	1.36094	2.36509	8.4806	6.16224	5.43872	2.24527	4.47323	6.11804	0	0	0	0	0	0	0	4.08837	0	0.780371	0	2.43179	3.39673	0.118896	0.291037	5.553	2.2666	3.69543	2.25527	0	0	1.16031	0.212047	0.408262	3.5125	5.11098	6.02903	0.274021	1.42493
srna43473	TGAGGTAGTAGACTGTATAGTT	22	1	hsa-let-7f-5p:1-22(1)	0	0	0.543868	0	0.434913	1.27408	1.42025	0.633636	0.680472	1.75192	3.88694	3.82484	3.57992	1.82428	2.42616	1.42754	0	0	0	0	0	0	0.261376	0.204419	0	0	0	1.0422	0.536326	0	0.0970123	0.5553	2.2666	0.410603	0.346964	0	0	0.386769	0	0	0.739474	1.63551	2.08697	0.411032	0.664969
srna29547	TGAGGTAGCAGATTGTATAGTT	22	1	hsa-let-7f-5p:1-22(1)	1.66894	0	0.679835	0	0.434913	2.99409	4.68681	0.950454	1.02071	3.76663	2.65019	3.82484	4.81912	1.61379	1.59217	2.65115	0	0	0	0	0	0	0	1.63535	0	0.780371	0.541683	1.0422	2.41347	0.118896	0.388049	0.27765	0.6476	2.05302	2.08178	0.817798	0	0.773538	0	0.408262	0.369737	4.29322	0.927544	0.548042	1.61492
srna4796	TGAGGTAGTAGATTGTCTAGTT	22	1	hsa-let-7f-5p:1-22(1)	14.6032	5.24155	13.0528	0	13.2648	4.90521	10.5808	6.33636	3.40236	3.06586	1.59011	3.18737	1.78996	1.1928	0.0758174	0.40787	0	0	0	0	0	0	0	69.2979	3.88336	28.6786	10.5628	29.5289	65.253	0	0.194025	1.6659	1.9428	2.46362	2.42875	9.81357	6.09778	17.0178	6.36142	6.5322	6.28553	5.7243	7.18846	1.78114	5.50974
srna45413	TGAGATAGTAGATTGTATAGTT	22	1	hsa-let-7f-5p:1-22(1)	0.417235	0	0.951769	0	0.65237	2.42075	3.55062	0.633636	1.19083	1.66432	1.23675	0.212491	0.89498	0.491152	3.98041	2.03935	0	0	0.108444	0	0	0	0	3.47512	0	0.585278	0.270842	0.347398	1.60898	0	0	0	0	0.205302	0.346964	0	0	0.386769	0	0.204131	2.21842	2.04439	2.55074	0.685053	1.32994
srna45561	TGAGGTAGTAGATAGTATAGTT	22	1	hsa-let-7f-5p:1-22(1)	0	0	0	0	0.217457	0.95556	1.49126	0.950454	0.340236	0.700768	0.530038	0.212491	0.275378	0.140329	5.61049	4.9964	0	0	0	0	0	0	0	3.88396	0	1.56074	0.541683	2.08439	2.41347	0	0	0	0	0	0.173482	0	0	0	0.212047	0	1.29408	1.0222	1.39132	0.274021	0.85496
srna20154	TGAGGTAGTAGATTATATAGTT	22	1	hsa-let-7f-5p:1-22(1)	0.83447	0	0.815802	0	1.08728	1.72001	1.77531	0.633636	1.19083	1.13875	6.18377	3.61235	5.98948	3.15741	1.85753	0.713772	0	0.334437	0.108444	0	0.588349	0	0.261376	7.35907	0	1.95093	0.812525	3.12659	6.25713	0.594479	0.291037	3.05415	2.2666	3.69543	4.68401	0	0	2.32061	0.424095	1.02066	1.10921	0.817757	1.85509	0.959074	0.759964
srna34203	TGAGGTAGTAGATTTTATAGTT	22	1	hsa-let-7f-5p:1-22(1)	2.08618	0	1.2237	0	1.73965	0.95556	1.49126	0.316818	0.850591	0.613172	0.706717	1.91242	1.30805	0.491152	0.416996	0.611804	0	0	0.108444	0	0	0	0.261376	8.58559	0	1.75584	1.89589	5.21098	6.25713	0	0	0	0	0.205302	0.86741	0.817798	2.03259	3.48092	0.636142	0.816525	1.47895	1.43107	1.6232	0.137011	0.759964
srna8617	TGAGGTAGTAGATTGTATAGTTC	23	1	hsa-let-7f-5p:1-22(1)	0	0	2.71934	0	0.217457	7.26226	14.6285	6.33636	3.7426	4.55499	16.4312	1.06246	14.5262	1.47346	28.4315	23.8604	0	1.33775	0	0	0	0	0	3.06628	0	0.585278	0	3.82138	7.9555	0	0	1.6659	0	3.49013	2.25527	0	0	0	0	2.85784	8.50395	3.88435	7.18846	0.137011	2.27989
srna15480	TGAGGGAGTAGATTGTATAGTT	22	1	hsa-let-7f-5p:1-22(1)	2.50341	0	0.679835	0	0.869826	2.86668	8.87654	4.11863	4.25295	6.04412	4.94702	8.49964	7.15984	5.96399	5.68631	5.20034	0	0	0	0.683038	0.294174	0	0.261376	0.817675	0	0.780371	1.08337	2.43179	4.29061	0.356687	1.06714	3.05415	2.9142	5.74845	7.11276	0	0	1.16031	0	0.816525	4.06711	4.90654	10.203	1.09608	3.03986
srna24293	TGAGGAAGTAGATTGTATAGTT	22	1	hsa-let-7f-5p:1-22(1)	0.417235	0	0.543868	0	0.869826	0.891856	2.34341	0.633636	0.510354	1.92711	3.18023	7.64968	5.02566	4.77119	4.54905	4.48657	0	0	0	0	0	0	0	1.63535	0	0.780371	0	0.694797	1.69836	0.237792	0.485062	3.05415	3.238	3.90073	7.63321	0	0	1.93384	0.636142	0.612393	0.924342	2.65771	1.39132	0.411032	0.85496
srna33261	TGAGGTAGTAGATTGTAGAGTT	22	1	hsa-let-7f-5p:1-22(1)	0	0	0.135967	0	0	1.21038	1.63328	0.633636	0.170118	0.963556	2.65019	3.61235	3.30454	1.96461	2.95688	3.56886	0	0.334437	0	0	0.588349	0	0.261376	0	0	0	0	0	0.0893876	0.356687	0.485062	2.49885	4.5332	4.72194	8.15366	0	0	0	0	0	1.66382	1.43107	0.927544	0.137011	0.569973
srna19477	TGAGGTAGTAAATTGTATAGTT	22	1	hsa-let-7f-5p:1-22(1)	2.50341	0	2.17547	0	0.869826	12.5497	17.54	6.01954	7.14496	8.58441	2.82687	1.27495	1.78996	1.12263	3.86669	3.05902	0	0.334437	0.108444	0	0.294174	0	0.784128	0.204419	0	0	0	0.694797	0.35755	0	0.194025	0.27765	0.9714	2.25832	2.94919	0.817798	2.03259	1.16031	0.212047	0.204131	12.5711	11.8575	12.0581	4.38434	5.22475
srna21014	TGAGGTAGTAGATTGTAAAGTT	22	1	hsa-let-7f-5p:1-22(1)	0.417235	0	0	0	0	2.67557	4.68681	1.58409	1.19083	2.71548	3.71026	5.09978	5.36988	3.78889	7.92292	5.71017	0	0	0.108444	0	0.294174	0	0	1.83977	0	0.195093	0	0	0.178775	0.594479	0.388049	3.8871	1.9428	2.46362	7.80669	0	0	0.386769	0	0	2.77303	3.47547	2.31886	1.2331	1.04495
srna8744	TGAGGTAGTAGATTGTATAGTTTA	24	1	hsa-let-7f-5p:1-22(1)	6.25853	0	8.56592	0	0	11.2756	12.8532	4.43545	3.06213	5.25576	2.65019	13.3869	10.6709	8.13909	20.6982	14.6833	0	0	0	0	0	0	0	2.45302	0	0.195093	0	6.94797	4.91632	0.118896	0	0	4.2094	2.46362	8.84758	8.99578	0	7.73538	0	0	6.65526	4.90654	3.71017	0	0
srna21369	TGAGGTAGTAGATTGGATAGTT	22	1	hsa-let-7f-5p:1-22(1)	0.83447	0	0.135967	0	0	0.891856	1.56227	0.316818	0.510354	0.350384	2.12015	2.12491	2.82263	1.68395	8.94646	8.15739	0	0.668875	0	0	0	0	0.261376	5.51931	0	2.34111	1.62505	2.43179	5.09509	0.713375	0.485062	3.3318	1.9428	3.90073	3.8166	0	0	0	0	0.204131	0.184868	0.408878	1.15943	0.137011	0.284987
srna30731	TGAGGTAGAAGATTGTATAGTT	22	1	hsa-let-7f-5p:1-22(1)	2.92065	0.873592	3.26321	0	2.60948	2.35705	3.33758	1.90091	1.53106	1.75192	1.59011	3.39986	2.6161	1.96461	1.21308	1.12164	0	0	0.108444	0	0	0	0	2.45302	0	1.17056	0.541683	1.73699	2.50285	0.118896	0.388049	1.1106	0.9714	1.02651	2.60223	1.6356	0	2.32061	1.48433	1.83718	1.29408	1.83995	1.39132	0.411032	1.23494
srna5216	TGAGGTCGTAGATTGTATAGTT	22	1	hsa-let-7f-5p:1-22(1)	5.42406	0.873592	3.67111	0	3.04439	68.8003	87.1321	34.85	38.957	44.3236	7.77389	8.28715	8.74327	4.84136	0.151635	0.101967	0	0	0	0	0	0	0	0.204419	0	0.585278	0.270842	0	0.178775	0	0	0.5553	0	0.410603	0.346964	0	2.03259	3.86769	1.06024	1.22479	60.0822	63.3762	62.8411	16.1673	31.5385
srna1894	TGAGGTAGTCGATTGTATAGTT	22	1	hsa-let-7f-5p:1-22(1)	84.2815	18.3454	73.966	0	55.4514	212.771	259.479	104.55	102.411	129.905	1.06008	1.48744	0.757291	0.91214	1.06144	0.713772	0	0.668875	0.108444	0	0	0	0.261376	0.613256	0	0	0	0	0.625713	0.951166	0.679086	2.2212	3.5618	5.95375	10.7559	20.4449	18.2934	57.6286	20.5686	27.5577	172.667	172.956	247.422	66.4501	86.1609
srna13844	TGAGGTAGTAGATTGTATAGTTAA	24	1	hsa-let-7f-5p:1-22(1)	13.3515	0	8.15802	0	0	3.50372	7.66933	4.43545	3.40236	2.97826	10.4241	8.71213	6.88446	3.08724	9.09809	7.95346	0	0	0	0	0	0	0	2.24861	0	2.92639	4.60431	0	6.07836	0	0	0.83295	2.9142	0	6.24535	0	38.6193	0	6.14938	0	2.9579	9.81308	9.97109	0.411032	0.759964
srna38773	TGAGGTAGTAGATGGTATAGTT	22	1	hsa-let-7f-5p:1-22(1)	0	0	0	0	0	0.828152	1.42025	0	0.340236	0.613172	0	0.212491	0.0688446	0.0701646	5.68631	3.56886	3.54315	0.334437	0.108444	0	0	0	0	5.72372	0	2.34111	0.270842	3.47398	4.20122	0	0	0	0	0	0.173482	0	0	0	0	0	0.554605	1.43107	1.6232	0.685053	0.284987
srna21748	TGAGGTGGTAGATTGTATAGTT	22	1	hsa-let-7f-5p:1-22(1)	0.83447	0	1.08774	0	2.17457	6.81633	11.504	4.11863	4.42307	4.99297	1.41343	3.18737	2.34072	0.841975	1.70589	1.52951	0	0	0.108444	0	0	0	0	3.88396	0	1.56074	1.08337	0	3.12857	0.118896	0.485062	3.05415	0.6476	2.05302	3.46964	0	0	0.773538	0.636142	0.612393	7.57961	11.653	9.97109	3.56228	4.1798
srna194	TGAGGTAGTAGATTGTATAGTTA	23	1	hsa-let-7f-5p:1-22(1)	490.251	1.74718	320.882	0	190.492	651.947	901.218	464.772	256.708	501.312	923.502	1182.73	1227.5	696.805	522.306	511.672	0	55.5166	7.69952	27.3215	20.298	16.8701	19.8646	611.825	77.6672	172.852	92.357	322.038	567.969	38.76	69.5578	496.716	254.831	645.674	1087.39	162.742	83.3364	191.451	98.6021	135.339	763.692	593.692	616.121	147.286	248.223
srna20919	TGAGGTAGTAGATTGTGTAGTT	22	1	hsa-let-7f-5p:1-22(1)	0	0	0.271934	0	0.65237	5.16002	8.02439	3.485	3.06213	3.41624	1.59011	1.69993	1.51458	0.491152	1.09935	0.815739	0	0	0	0	0	0	0	9.60768	7.76672	2.7313	1.35421	4.86358	6.88285	0.356687	0.582074	0.83295	1.9428	2.66892	2.77571	0	0	0.386769	0	0	4.99145	5.31542	2.55074	1.78114	2.94486
srna23704	CTGAGGTAGTAGATTGTATAGTT	23	1	hsa-let-7f-5p:1-22(1)	0	0	0.135967	0	5.87133	3.63113	7.59832	0	2.89201	2.45269	0	2.97487	1.10151	1.68395	3.37388	8.7692	0	0.334437	0	0	0	0	0	0	0	3.12149	0	0	2.68163	0.594479	0	0	0.9714	0	7.28624	0	0	5.41477	0	0	2.77303	2.04439	0	0.137011	1.61492
srna31862	TGAGGTAGTAGATTGTACAGTT	22	2	hsa-let-7f-5p:1-22(1);hsa-let-7g-5p:1-22(1)	0.417235	0	0.407901	0	0.217457	2.93038	4.26074	1.90091	0.510354	2.2775	1.76679	1.69993	3.51108	1.82428	4.58695	4.3846	0	0	0	0.683038	0	0	0.261376	1.22651	0	0.975464	0.270842	0	1.4302	0.237792	0.679086	0.5553	1.2952	2.46362	2.08178	0	0	0.773538	0	0	1.29408	2.04439	2.31886	0.959074	1.80491
srna23139	GAGGTAGTAGATTGTAT	17	1	hsa-let-7f-5p:2-18(1)	0	0.873592	0.407901	0	0.434913	2.54816	5.32593	2.21773	1.8713	2.71548	5.47706	5.52477	5.85179	3.29774	4.01832	4.48657	0	0.334437	0.325332	0	0.294174	0	0	3.2707	0	0.975464	0.812525	1.73699	2.23469	0.594479	0.485062	0.83295	1.619	3.28483	3.64312	0	0	1.16031	0.424095	0.816525	3.69737	3.06659	4.8696	1.09608	1.80491
srna9157	GAGGTAGTAGATTGTATA	18	1	hsa-let-7f-5p:2-19(1)	5.00682	0.873592	4.35094	0	2.82694	4.39558	10.7229	5.70272	3.06213	7.79604	14.6644	12.112	20.1026	10.3142	8.30201	7.74952	0	0.334437	0.759107	0	0.882523	0.366741	1.30688	8.17675	0	2.34111	1.62505	4.51618	6.25713	0.951166	0.388049	4.72005	3.5618	11.2916	11.1028	1.6356	0	3.86769	3.60481	3.67436	14.2349	9.19977	8.57978	3.97331	5.69973
srna2892	GAGGTAGTAGATTGTATAG	19	1	hsa-let-7f-5p:2-20(1)	10.8481	2.62078	16.1801	0	8.48081	24.1438	44.9508	16.4745	18.0325	26.2788	51.767	55.6726	59.3441	36.4856	30.2132	36.1984	0	1.67219	1.51821	2.04911	1.47087	0.733483	1.56826	34.9556	0	9.16936	5.68768	13.5485	19.1289	2.97239	3.00738	16.659	9.0664	26.4839	33.482	5.72459	0	8.89569	4.24095	7.96112	26.0665	31.0748	40.58	11.9199	15.5793
srna4162	GAGGTAGTAGATTGTATAGTTT	22	1	hsa-let-7f-5p:2-20(1)	11.2653	0.873592	5.57465	0	4.34913	37.9676	39.9799	11.4054	10.037	14.8913	13.9577	19.9742	19.4142	11.3667	35.8616	17.1305	0	5.351	0.108444	0	0.294174	0	0.261376	8.58559	0	1.56074	2.16673	6.94797	20.0228	0.594479	0.873111	5.27535	7.7712	6.56965	13.7051	0.817798	2.03259	13.5369	0.636142	5.10328	24.2178	18.3995	18.5509	3.56228	7.31466
srna610	GAGGTAGTAGATTGTATAGT	20	1	hsa-let-7f-5p:2-21(1)	146.867	32.3229	121.962	0	116.774	124.35	250.603	126.727	110.747	152.68	294.878	294.088	324.327	196.321	147.806	224.838	7.08629	17.3907	8.78395	4.78126	7.94271	5.13438	10.9778	275.965	15.5334	84.085	43.6055	114.641	152.674	20.8068	17.5592	106.34	75.4454	203.865	212.862	44.1611	22.3585	106.361	55.7685	86.1434	185.053	201.373	252.524	84.5355	103.355
srna44468	GAGGTAGTAGATTGTATAGTA	21	1	hsa-let-7f-5p:2-21(1)	1.66894	0	1.49564	0	0.217457	0.891856	2.76948	0.316818	1.02071	1.66432	1.59011	2.76238	2.82263	1.96461	0.909809	0.815739	0	0	0.542219	0	0	0	0	2.04419	0	0.390186	0	0	0.893876	0	0	1.1106	0.3238	2.05302	2.42875	0	0	1.16031	1.27228	0.204131	1.47895	1.0222	2.78263	0.274021	0.474978
srna440	GAGGTAGTAGATTGTATAGTT	21	1	hsa-let-7f-5p:2-22(1)	233.652	50.6683	177.573	0	147.218	345.785	467.545	177.735	180.665	233.706	374.207	379.721	396.82	241.717	394.326	333.127	14.1726	27.7583	6.39819	1.36608	6.76601	3.30067	9.67091	233.855	11.6501	57.3573	27.8967	87.8918	169.658	11.6518	16.007	79.9632	46.6272	115.174	179.38	67.8772	46.7497	155.094	52.1637	78.3864	293.756	321.992	326.959	95.2224	158.453
srna36520	GAGGCAGTAGATTGTATAGTT	21	1	hsa-let-7f-5p:2-22(1)	0.83447	0	0	0	0.217457	1.14667	6.17807	1.90091	1.70118	2.45269	1.06008	2.76238	2.6161	2.3856	2.95688	2.95705	0	0	0	0	0	0	0.261376	1.02209	0	0.390186	0	1.0422	1.16204	0.118896	0	0.83295	0	2.66892	1.21437	0	0	0	0	0.408262	2.03355	2.86215	4.63772	1.37011	1.89991
srna43823	CGAGGTAGTAGATTGTATAGTT	22	1	hsa-let-7f-5p:2-22(1)	0.417235	1.74718	0.407901	0	0.217457	2.29334	2.41442	0.950454	2.21154	1.05115	1.41343	2.3374	2.06534	0.841975	1.70589	1.83541	0	0.334437	0	0	0	0	0	1.63535	0	0.390186	0.270842	0.694797	2.68163	0.237792	0	0.83295	0.3238	1.84771	2.77571	0.817798	0	1.16031	0	0.204131	1.10921	4.90654	1.85509	0.411032	0.664969
srna38431	GAGGTCGTAGATTGTATAGTT	21	1	hsa-let-7f-5p:2-22(1)	1.66894	0.873592	2.58337	0	2.17457	5.92447	8.66351	0.950454	2.55177	3.67903	2.12015	1.69993	2.40956	1.05247	0.0758174	0.203935	0	0	0	0	0.294174	0	0	0.408837	0	0.195093	0.270842	0	0.0893876	0	0	0	0	0	0	0	0	0.773538	0.212047	1.42892	4.99145	5.51986	5.79715	0.959074	3.03986
srna5351	GAGGTAGTAGATTGTATAGTTA	22	1	hsa-let-7f-5p:2-22(1)	26.2858	0	14.8204	0	10.6554	16.8179	21.8718	13.3064	5.78402	10.8619	20.4948	23.374	26.574	15.7169	10.8798	11.0125	0	1.33775	0.325332	0.683038	0	0.733483	0	13.0828	0	4.68223	1.62505	5.21098	9.56447	0.713375	1.06714	7.2189	6.1522	10.881	15.2664	9.81357	4.06519	9.66922	3.60481	5.71567	20.1507	16.9685	17.1596	3.28825	4.84477
srna37898	AGGTAGTAGATTGTATAGTTT	21	1	hsa-let-7f-5p:3-20(1)	1.25171	0	1.08774	0	0	2.67557	3.76365	0.633636	0.510354	1.05115	2.12015	2.3374	1.2392	1.1928	2.65361	1.01967	0	0.334437	0	0	0	0	0	0.817675	0	0.195093	0	0.694797	1.96653	0.118896	0	0.83295	0.3238	0.410603	0.693928	0	2.03259	1.16031	0	0.612393	2.77303	1.63551	3.2464	0.137011	0.664969
srna27045	AGGTAGTAGATTGTATAG	18	1	hsa-let-7f-5p:3-20(1)	4.58959	0	2.85531	0	1.95711	2.35705	3.12454	0.950454	0.510354	1.92711	8.83396	3.82484	4.13068	2.87675	1.81962	1.63148	0	0	0.108444	0	0	0	0	2.45302	0	0.585278	1.35421	0.694797	1.25143	0.237792	0.194025	1.6659	1.2952	3.49013	2.77571	0.817798	0	3.09415	1.69638	1.63305	3.69737	2.86215	1.85509	1.91815	1.51993
srna4714	AGGTAGTAGATTGTATAGT	19	1	hsa-let-7f-5p:3-21(1)	22.5307	6.98874	24.882	0	19.3536	13.569	25.7775	13.3064	9.86685	12.789	38.8694	25.7114	26.2298	17.6815	12.0171	10.8085	0	2.6755	0.975995	0	0.588349	0.366741	0.784128	29.2319	0	6.24297	3.2501	11.4641	13.5869	2.14012	1.35817	11.9389	8.4188	19.9143	18.3891	4.90679	6.09778	18.1781	7.42166	11.8396	24.2178	16.5596	19.2465	6.71352	10.8295
srna45375	TAAGGTAGTAGATTGTATAGT	21	1	hsa-let-7f-5p:3-21(1)	0.83447	0.873592	2.58337	0	1.73965	0.700744	2.20138	0.633636	1.53106	1.31394	1.23675	0.637473	1.30805	0.420988	2.69152	4.58853	0	0.334437	0	0	0	0	0.261376	0.408837	0	0	0	0.347398	0.35755	0.118896	0.388049	1.1106	0.3238	2.87422	2.25527	0	0	1.93384	0.84819	1.22479	1.84868	1.83995	1.6232	0.548042	0.569973
srna32528	TAAGGTAGTAGATTGTATAGTT	22	1	hsa-let-7f-5p:3-22(1)	4.58959	0	2.85531	0	3.69676	2.93038	3.12454	0.633636	2.04142	1.31394	0.883396	1.69993	2.96032	0.420988	7.65756	6.01608	0	0.668875	0.216888	0.683038	0	0	0	0	0	0	0	0	0.268163	0	0.194025	1.38825	0.6476	1.02651	3.12268	0.817798	0	4.25446	1.90843	0.816525	2.03355	3.47547	1.15943	0.959074	1.23494
srna3459	AGGTAGTAGATTGTATAGTT	20	1	hsa-let-7f-5p:3-22(1)	40.4718	6.11514	34.6716	7.39295	22.1806	37.0757	41.8263	19.0091	14.8003	22.775	51.237	31.6612	33.665	18.3831	32.1466	13.8676	0	0.668875	0.325332	0	0.882523	0	0.784128	18.1933	3.88336	2.92639	1.62505	6.60057	15.3747	1.54565	1.94025	7.49655	7.4474	10.0598	15.6134	8.17798	6.09778	16.2443	7.42166	14.4933	42.7046	28.0082	28.9857	8.90569	14.0593
srna44625	TTAGGTAGTAGATTGTATAGTT	22	1	hsa-let-7f-5p:3-22(1)	0	0	0	0	0.217457	2.03853	2.20138	1.58409	0	1.31394	2.12015	2.3374	1.65227	0.91214	1.93334	1.93738	0	0	0	0	0	0	0	2.86186	0	0.195093	0	1.0422	1.96653	0.237792	0.291037	0.83295	0.3238	0.821207	0.693928	0	0	0.386769	0	0.408262	1.29408	1.43107	1.15943	0.411032	1.04495
srna46228	AGGTAGTAGATTGTATAGTTA	21	1	hsa-let-7f-5p:3-22(1)	0.417235	0	2.44741	0	1.30474	1.40149	2.27239	1.90091	1.36094	0.788364	3.00355	2.12491	2.40956	0.982304	1.36471	0.815739	0	0	0	0.683038	0	0	0	1.43093	0	0	0.812525	1.38959	1.16204	0.118896	0	0.5553	0	0.615905	1.38786	0.817798	0	1.93384	0.212047	0.204131	2.9579	1.43107	1.15943	0.411032	0.474978
srna31157	GGTAGTAGATTGTATA	16	1	hsa-let-7f-5p:4-19(1)	4.58959	0.873592	2.99127	0	1.30474	1.21038	2.98252	1.90091	0.510354	2.01471	2.47351	2.54989	3.64876	1.82428	2.31243	2.75312	0	0.334437	0.433775	0	0	0.366741	0	2.04419	0	0	0.270842	1.0422	2.1453	0.118896	0.0970123	1.94355	0.9714	3.90073	5.37794	2.45339	0	1.93384	1.90843	1.63305	2.03355	2.04439	0.927544	1.37011	0.664969
srna44897	GCGGTAGTAGATTGTATAG	19	1	hsa-let-7f-5p:4-20(1)	2.50341	0	2.44741	0	1.73965	0.63704	1.20721	0.633636	0.340236	0.350384	5.30038	7.2247	6.95331	3.85905	0.0379087	0.101967	0	0	0	0	0	0	0	0.408837	0	0	0.270842	0	0.446938	0	0	0	0	0.205302	0.346964	0.817798	0	1.93384	0.636142	1.22479	0	1.0222	0.695658	0.685053	0.379982
srna10582	GGTAGTAGATTGTATAG	17	1	hsa-let-7f-5p:4-20(1)	7.51023	4.36796	10.0616	0	6.74115	5.35114	9.72869	6.01954	3.57248	5.95653	11.4841	9.34961	12.8739	7.36728	6.36866	9.17707	0	1.00331	0.216888	0	0.294174	0	1.0455	8.58559	0	2.53621	1.08337	4.86358	6.43591	0.951166	0.485062	3.8871	2.2666	8.21207	11.2763	4.08899	2.03259	8.89569	3.39276	3.2661	7.025	5.51986	9.97109	2.6032	2.94486
srna10522	TGCGGTAGTAGATTGTATAG	20	1	hsa-let-7f-5p:4-20(1)	10.8481	1.74718	9.78962	0	5.43641	1.91112	4.82884	1.26727	1.02071	1.83952	19.6114	32.7236	36.9696	20.4179	0.113726	0.40787	0	0	0	0	0	0	0.261376	1.63535	0	0.390186	0.541683	0.694797	1.4302	0	0	0	0	0	0.173482	2.45339	0	5.028	2.75662	6.5322	2.21842	3.47547	3.94206	2.19217	1.51993
srna16169	GGTAGTAGATTGTATAGTTT	20	1	hsa-let-7f-5p:4-20(1)	5.00682	0	2.85531	0	0.869826	6.56151	7.88237	2.85136	1.53106	2.62788	2.82687	2.97487	3.78645	3.43806	8.37783	5.09837	0	1.00331	0	0	0	0	0	3.2707	0	0.585278	1.89589	1.38959	6.25713	0.356687	0.485062	2.2212	1.619	1.23181	3.29616	0	2.03259	8.50892	0	5.71567	4.06711	2.45327	3.47829	0.822064	1.80491
srna24196	GGGGTAGTAGATTGTATAGT	20	1	hsa-let-7f-5p:4-21(1)	7.51023	3.49437	5.57465	0	6.30624	0.573336	1.56227	0.950454	1.02071	1.13875	8.12724	6.79971	8.05482	5.19218	0.0379087	0.203935	0	0	0.433775	0.683038	0.294174	0	0.522752	7.56349	0	3.12149	2.43758	4.86358	5.00571	0	0	0	0.3238	0	0.173482	2.45339	0	8.12215	1.90843	4.08262	1.10921	0.817757	1.6232	0.685053	0.664969
srna1862	GGTAGTAGATTGTATAGT	18	1	hsa-let-7f-5p:4-21(1)	79.6919	25.3342	70.2949	0	66.1068	28.2209	49.9927	21.5436	23.1361	30.6586	55.8306	59.9225	64.3697	41.8883	40.7519	61.8942	3.54315	3.00994	2.81954	2.04911	2.3534	0.366741	3.13651	77.2703	0	21.4602	11.1045	25.7075	47.733	7.01485	6.01476	28.3203	22.3422	59.9481	62.974	26.1695	16.2608	49.1197	26.0818	39.6014	31.6125	36.1857	54.4932	17.8114	22.3239
srna10051	GCGGTAGTAGATTGTATAGT	20	1	hsa-let-7f-5p:4-21(1)	23.7824	6.98874	17.4038	0	16.0918	1.40149	2.48543	1.58409	0.850591	0.525576	23.4983	33.9986	35.7304	20.0671	0.189544	0.101967	0	0	0.108444	0	0.588349	0	0	3.67954	0	0.975464	0.812525	1.38959	1.69836	0	0	0	0	0.410603	0.520446	1.6356	12.1956	16.6311	7.42166	13.8809	1.29408	1.63551	1.6232	1.64413	1.04495
srna2236	TGCGGTAGTAGATTGTATAGT	21	1	hsa-let-7f-5p:4-21(1)	74.2679	20.9662	78.0451	0	67.8464	5.41484	14.0604	7.28681	3.57248	8.32162	112.191	167.018	174.108	112.334	0.416996	0.509837	0	0	0.867551	0	0.882523	0	0.522752	13.0828	0	4.09695	1.89589	5.55838	7.86611	0	0	0.27765	0	1.43711	2.42875	24.5339	16.2608	74.6464	34.9878	52.0534	2.77303	10.8353	16.0001	5.89146	5.22475
srna14939	TGGGGTAGTAGATTGTATAGT	21	1	hsa-let-7f-5p:4-21(1)	1.66894	0	0.951769	0	1.95711	1.91112	3.4796	3.80182	2.72189	1.92711	4.2403	4.88729	7.7106	4.63086	1.63007	3.77279	0	0.334437	0.216888	0	0.294174	0	0.261376	21.464	0	5.4626	5.41683	5.90577	12.0673	0.475583	0.194025	1.94355	2.5904	3.49013	2.42875	0	0	1.54708	0.636142	2.04131	4.43684	4.08878	3.47829	1.09608	1.32994
srna1423	GGTAGTAGATTGTATAGTT	19	1	hsa-let-7f-5p:4-22(1)	121.415	19.219	99.3919	7.39295	75.4574	69.5648	94.5884	38.0182	35.0443	45.8127	74.0286	74.3719	86.8131	51.0097	101.216	81.5739	7.08629	8.0265	1.62666	1.36608	1.47087	1.10022	3.13651	66.2317	7.76672	16.778	9.47946	27.0971	45.9452	4.63694	4.26854	23.8779	15.2186	37.7755	58.6369	33.5297	30.4889	83.1553	29.4746	44.0923	50.0993	68.6916	68.8701	20.9626	33.7234
srna7246	GCGGTAGTAGATTGTATAGTT	21	1	hsa-let-7f-5p:4-22(1)	33.796	9.60951	29.2329	0	22.398	3.37631	6.03605	3.16818	1.70118	3.24105	30.5655	41.0108	43.6475	24.0665	0.454905	0.713772	0	0.334437	0	0	0	0	0	2.04419	0	0.195093	0.270842	1.0422	3.30734	0	0	0	0	0	0	8.17798	12.1956	23.2061	6.78552	9.1859	2.21842	4.7021	5.56526	1.09608	1.80491
srna1633	TGCGGTAGTAGATTGTATAGTT	22	1	hsa-let-7f-5p:4-22(1)	149.787	32.3229	109.725	0	93.0714	16.0534	24.7123	11.7223	8.67602	12.4386	150.001	218.016	223.401	129.103	0.606539	0.917707	0	0	0.325332	0	0.294174	0	1.0455	12.2651	0	2.14602	1.89589	4.16878	9.20692	0.237792	0	0.27765	0.3238	0.821207	1.04089	40.0721	28.4563	99.0128	36.4722	44.0923	6.65526	18.1951	21.5654	6.98754	7.78963
srna19085	GGGGTAGTAGATTGTATAGTT	21	1	hsa-let-7f-5p:4-22(1)	10.8481	0.873592	12.1011	0	6.08878	1.72001	2.91151	0.633636	1.19083	0.788364	7.42053	8.92462	11.1528	6.45514	0.341178	0.203935	0	0	0.108444	0.683038	0.294174	0	0	5.51931	0	1.17056	0.541683	2.43179	5.45264	0	0.0970123	0	0	0	0.173482	4.08899	0	9.28245	2.12047	2.04131	1.66382	0.408878	1.6232	0.548042	0.949955
srna20931	GGTAGTAGATTGTATAGTTA	20	1	hsa-let-7f-5p:4-22(1)	9.59641	0	7.07028	0	4.78404	2.86668	5.25491	1.90091	1.8713	3.15346	4.94702	3.82484	5.7141	2.94691	2.53988	3.36492	0	0.334437	0	0	0.294174	0	0.522752	3.67954	0	1.56074	0.541683	1.73699	2.50285	0.356687	0.291037	2.49885	1.619	1.84771	5.55142	6.54238	2.03259	3.86769	1.90843	2.65371	3.5125	3.06659	3.2464	0.411032	0.949955
srna13566	TGGGGTAGTAGATTGTATAGTT	22	1	hsa-let-7f-5p:4-22(1)	1.66894	0	0.679835	0	1.30474	3.69483	6.67516	3.485	2.55177	2.71548	6.00709	10.4121	11.084	5.26234	4.32159	2.95705	0	0	0.108444	0	0.588349	0	0.522752	14.5137	0	3.51167	0.812525	3.82138	12.5143	0	0.582074	1.38825	0	1.23181	1.9083	0	0	0.773538	0.84819	0.204131	3.5125	6.13318	4.40583	1.37011	1.51993
srna17433	GTAGTAGATTGTATAG	16	1	hsa-let-7f-5p:5-20(1)	7.093	1.74718	7.07028	0	6.08878	2.93038	6.95921	0.316818	2.04142	3.24105	6.36045	7.43719	9.77593	6.31481	1.93334	2.03935	0	0.334437	0.216888	0	0	0	0.261376	5.72372	3.88336	1.17056	1.35421	3.47398	3.12857	0.475583	0.485062	3.3318	1.9428	3.49013	4.8575	3.27119	0	5.80153	2.33252	4.28675	1.84868	3.67991	5.33338	2.05516	2.46988
srna25528	TGATGTAGTAGATTGTATAG	20	1	hsa-let-7f-5p:5-20(1)	0	0	0.407901	0	0.217457	5.28743	10.5098	3.80182	3.91272	6.30691	6.36045	4.24982	5.98948	3.3679	0.0379087	0	0	0	0	0	0	0	0	1.02209	0	0.195093	0	0.347398	0.536326	0.237792	0.0970123	0	0.3238	0.615905	0.346964	0	0	0.386769	0	0	6.4704	9.19977	10.8986	2.32918	5.12976
srna5355	GTAGTAGATTGTATAGT	17	1	hsa-let-7f-5p:5-21(1)	42.558	13.1039	34.9435	0	37.1851	8.91856	13.3503	6.65318	5.6139	9.10998	20.4948	26.1364	28.5017	17.8218	6.93729	10.2987	0	2.6755	0.975995	0.683038	2.05922	0.366741	1.30688	21.6684	7.76672	7.21843	3.52094	10.422	13.2294	1.66454	1.06714	7.2189	3.8856	10.2651	17.3482	8.99578	8.13038	29.7812	10.3903	24.0875	7.57961	13.2886	18.0871	6.85053	7.21966
srna3597	TGATGTAGTAGATTGTATAGT	21	1	hsa-let-7f-5p:5-21(1)	1.66894	0	1.49564	0	1.73965	45.7395	103.465	43.7209	44.4008	59.1273	45.4066	34.636	35.5238	20.2776	0.189544	0.40787	0	0	0.759107	0	0.588349	0	0.784128	11.8563	0	3.70676	1.89589	3.82138	4.46938	0.237792	0.194025	0.83295	0.6476	1.02651	0.86741	0	0	1.54708	0.424095	0.816525	70.0651	70.9404	89.9717	29.1833	43.6029
srna11378	GATGTAGTAGATTGTATAGT	20	1	hsa-let-7f-5p:5-21(1)	0	0	0.543868	0	0.65237	17.009	29.044	8.23727	13.2692	17.8696	11.6608	8.71213	9.91362	6.17448	0.113726	0	0	0	0.325332	0	0.294174	0	0	3.2707	0	0.585278	0	0.347398	0.893876	0	0.0970123	0.27765	0	0.821207	1.21437	0	0	0.773538	0.212047	0.612393	16.823	24.3283	34.3191	10.1388	12.3494
srna3926	GTAGTAGATTGTATAGTT	18	1	hsa-let-7f-5p:5-22(1)	58.8302	12.2303	52.3473	7.39295	43.7088	23.3157	28.76	13.3064	10.3772	16.2053	28.7987	35.2735	35.7992	22.5228	17.7034	16.2128	3.54315	2.6755	0.975995	0.683038	0.882523	0	1.0455	17.58	11.6501	5.26751	2.70842	6.25317	13.0506	0.83227	2.13427	4.4424	6.7998	8.82797	14.052	14.7204	8.13038	45.6387	16.9638	20.8214	16.4533	24.7371	21.5654	7.53558	8.73959
srna7435	GATGTAGTAGATTGTATAGTT	21	1	hsa-let-7f-5p:5-22(1)	3.33788	0	0.815802	0	0.217457	35.4194	54.2534	27.5632	22.7958	27.4175	12.7209	12.962	10.8774	7.78827	0.265361	0.101967	0	0	0.216888	0	0	0	0.261376	3.06628	0	0.585278	0	0.694797	1.69836	0	0	0.83295	0.3238	0.615905	0.693928	0	0	1.54708	0.212047	0.816525	31.4276	37.2079	40.58	9.59074	16.8142
srna2322	TGATGTAGTAGATTGTATAGTT	22	1	hsa-let-7f-5p:5-22(1)	2.92065	1.74718	2.58337	0	1.95711	126.898	169.506	71.9177	69.7484	92.9394	57.4207	38.8859	43.9917	25.0488	0.454905	0.40787	0	0	0.216888	0.683038	0	0	0.261376	9.60768	0	2.34111	0.812525	2.77919	5.27387	0.118896	0.194025	0.5553	1.2952	0.615905	1.9083	1.6356	2.03259	3.09415	1.69638	1.63305	115.913	115.917	116.87	33.2936	60.6071
srna30081	GAGTTAGTAGATTGTATAG	19	1	hsa-let-7f-5p:6-20(1)	3.33788	1.74718	4.75884	0	1.73965	2.10223	3.4796	1.90091	2.21154	1.22634	8.83396	7.0122	8.88095	4.84136	0	0	0	0	0.108444	0	0.588349	0	0.261376	0	0	0.195093	0	0	0.0893876	0	0	0	0	0	0	2.45339	0	3.86769	1.27228	2.24544	2.21842	3.47547	3.71017	0.685053	1.13995
srna35048	GAGATAGTAGATTGTATAGT	20	1	hsa-let-7f-5p:6-21(1)	10.0136	4.36796	14.5485	0	11.0903	1.21038	1.49126	0.633636	0.680472	0.788364	1.06008	1.06246	1.51458	0.91214	2.31243	3.26296	0	0	0	0.683038	0	0	0.261376	4.29279	0	1.17056	1.35421	2.77919	1.87714	0	0	0	0	0	0	4.08899	2.03259	11.2163	3.81685	7.96112	1.29408	1.63551	2.55074	0.274021	0.949955
srna6218	GAGTTAGTAGATTGTATAGT	20	1	hsa-let-7f-5p:6-21(1)	53.4061	12.2303	44.0533	0	42.1866	6.81633	14.9836	8.55408	6.29437	9.46037	46.4666	36.1235	41.9952	23.3648	0.454905	0.917707	0	0	1.51821	0.683038	1.47087	1.46697	2.35238	0.408837	0	0.195093	0	0	0.35755	0	0	0	0	0	0	13.0848	12.1956	42.1578	19.0843	31.4362	11.8316	11.8575	12.29	5.75445	6.4597
srna18225	TAGTAGATTGTATAGT	16	1	hsa-let-7f-5p:6-21(1)	20.0273	5.24155	17.8117	0	12.8299	2.67557	2.69847	2.21773	0.850591	2.1899	6.71381	6.79971	7.91713	4.98169	1.51635	1.32558	0	0	0.108444	0	0	0.366741	0.261376	5.11047	3.88336	1.56074	0.541683	1.73699	2.41347	0.475583	0.388049	0.83295	0.3238	1.64241	2.60223	8.17798	8.13038	14.3105	4.66504	10.2066	1.66382	2.45327	2.08697	0.959074	1.99491
srna29449	GTTAGTAGATTGTATAGT	18	1	hsa-let-7f-5p:6-21(1)	21.279	9.60951	20.803	0	21.0933	0.700744	0.781136	0	0.510354	0.963556	4.41698	3.18737	4.61259	2.73642	0	0	0	0	0.759107	0.683038	0.294174	0	0.784128	0	0	0.195093	0	0	0.35755	0	0	0	0	0	0	8.17798	4.06519	19.3384	9.54213	14.4933	0.924342	1.0222	0.695658	0.685053	0.379982
srna12823	TAGTAGATTGTATAGTT	17	1	hsa-let-7f-5p:6-22(1)	28.372	6.98874	29.6408	0	18.9187	5.92447	7.81136	2.21773	1.36094	4.81778	13.2509	7.86217	10.0513	5.96399	3.75296	3.26296	0	0.334437	0.108444	0.683038	0.294174	0	0.261376	5.92814	0	1.17056	0.270842	2.08439	2.23469	0.356687	0.0970123	0.5553	0.3238	1.43711	1.9083	8.99578	2.03259	24.7532	7.84576	9.1859	4.43684	5.11098	4.40583	1.50712	2.46988
srna4705	GAGTTAGTAGATTGTATAGTT	21	1	hsa-let-7f-5p:6-22(1)	75.1023	12.2303	65.944	0	55.4514	19.6845	26.9847	8.8709	11.9083	14.0154	49.6469	42.4982	43.5098	27.2239	1.09935	0.815739	0	0	1.08444	0.683038	1.76505	0.733483	1.0455	0.204419	0	0	0	0.347398	0.35755	0	0	0	0	0	0	24.5339	16.2608	54.9212	20.7806	25.7205	19.0414	18.8084	16.9277	4.24733	9.78454
srna25695	GAGATAGTAGATTGTATAGTT	21	1	hsa-let-7f-5p:6-22(1)	20.0273	4.36796	19.7152	0	9.35063	2.61186	4.11872	1.26727	1.36094	2.1899	1.06008	1.69993	1.37689	0.982304	4.58695	4.18066	0	0	0	0	0	0	0	2.86186	0	0	0.270842	1.0422	1.51959	0	0	0	0	0	0	5.72459	0	17.0178	4.66504	7.14459	3.32763	2.24883	2.55074	0.548042	1.51993
srna22559	GTTAGTAGATTGTATAGTT	19	1	hsa-let-7f-5p:6-22(1)	35.465	6.98874	32.0882	7.39295	22.6155	2.22964	2.05936	0.950454	0.680472	1.05115	6.00709	4.6748	4.13068	2.66625	0.0758174	0.101967	0	0	0.325332	0.683038	0	0	0.261376	0	0	0.195093	0	0	0	0	0	0	0	0	0	12.267	4.06519	29.7812	8.90599	12.8603	2.21842	1.0222	1.39132	0.274021	1.04495
srna8950	AGTAGATTGTATAGT	15	1	hsa-let-7f-5p:7-21(1)	65.5059	13.1039	42.9656	0	43.7088	2.35705	3.12454	2.85136	1.36094	2.1023	20.4948	19.7617	18.4504	11.8578	1.89544	2.75312	0	0.668875	0.542219	0	0.588349	0.366741	0.784128	10.4254	3.88336	1.75584	1.89589	3.47398	4.29061	0.713375	0	1.1106	0.6476	1.23181	3.64312	8.17798	14.2282	40.9975	19.5084	33.6816	3.88224	2.65771	4.63772	1.78114	1.89991
srna6956	AGTAGATTGTATAGTT	16	1	hsa-let-7f-5p:7-22(1)	81.7781	14.8511	64.5843	0	52.8419	7.51707	7.38528	4.43545	2.21154	4.2922	23.675	25.0739	20.9976	14.5241	4.58695	4.0787	0	2.00662	0.433775	0	0.588349	0.366741	0.261376	6.95024	3.88336	2.14602	0.812525	1.38959	4.11183	0.713375	0	0	0.6476	0.821207	1.38786	17.1738	10.163	59.9492	22.0529	30.0073	4.06711	5.11098	6.02903	1.78114	2.75487
srna6507	GTAGATTGTATAGTT	15	1	hsa-let-7f-5p:8-22(1)	92.209	13.1039	77.6372	22.1789	65.6719	6.17929	10.5098	2.85136	3.57248	4.81778	21.7315	22.0991	20.0338	12.5595	2.95688	3.97673	0	1.00331	0.867551	0	0.882523	0	1.0455	6.5414	3.88336	2.7313	1.35421	3.47398	5.54203	0.594479	0.582074	0.27765	1.619	2.46362	1.9083	31.0763	12.1956	64.2036	22.0529	30.6197	5.73092	6.33762	6.02903	2.87722	3.22985
srna22044	TGAGGTAGTAGTTTGT	16	2	hsa-let-7g-5p:1-16(1);hsa-let-7i-5p:1-16(1)	0.83447	1.74718	2.31144	0	1.08728	2.16594	1.98835	2.53454	1.53106	0.963556	12.3675	6.16224	3.64876	2.80658	1.97125	0.815739	0	0.668875	0.216888	0	0.294174	0	0.522752	5.72372	3.88336	1.36565	1.62505	6.60057	5.98897	0.475583	1.26116	2.7765	0.6476	2.05302	3.64312	1.6356	0	3.48092	3.39276	2.04131	2.21842	2.65771	0.695658	1.78114	1.23494
srna9768	TGAGGTAGTAGTTTGTA	17	1	hsa-let-7g-5p:1-17(1)	0.417235	2.62078	0.543868	0	0.217457	4.7141	13.6344	6.01954	2.55177	4.81778	6.18377	3.82484	16.3162	6.10432	4.70068	7.23969	0	6.68875	0.216888	0.683038	0.588349	0	9.93229	5.92814	3.88336	0.195093	3.79178	4.16878	5.98897	0.475583	0.291037	3.60945	6.7998	13.5499	7.45973	0.817798	0	5.41477	3.60481	0.408262	13.4954	15.5374	6.95658	6.30249	2.0899
srna1707	TGAGGTAGTAGTTTGTAC	18	1	hsa-let-7g-5p:1-18(1)	7.51023	0.873592	28.825	0	17.8314	54.2758	60.0764	58.2945	21.4349	28.9943	32.1556	29.1113	82.0628	42.8004	65.3925	38.6456	17.7157	39.1292	1.62666	0	8.23689	9.53528	3.39789	32.9114	0	11.9007	8.12525	29.8763	79.9125	6.65816	2.52232	41.0922	16.8376	53.9943	67.1375	44.9789	2.03259	35.9695	24.1734	37.5601	77.8296	47.021	45.9134	6.98754	14.7243
srna836	TGAGGTAGTAGTTTGTACA	19	1	hsa-let-7g-5p:1-19(1)	40.889	42.806	81.7162	0	40.012	73.8329	150.546	96.6295	47.2928	84.2674	83.746	140.457	254.45	122.227	90.9051	100.846	60.2335	12.0397	15.9412	0.683038	25.5932	0.366741	62.9916	102.005	0	53.6505	46.8556	95.882	87.9574	25.8004	25.5142	102.73	58.284	196.884	193.432	0.817798	0	35.5827	94.1491	83.8979	136.248	76.8692	125.682	68.7793	51.0126
srna26499	TGAGGTAGTAGTTTGTACAGAA	22	1	hsa-let-7g-5p:1-20(1)	0	16.5982	0	0	0	2.10223	4.54479	0	2.04142	1.75192	6.00709	0.212491	1.58343	3.43806	2.69152	0.40787	0	0	3.03643	0	0	0	0	0	0	3.31658	0	0	0.268163	0	0	0	6.1522	0	2.42875	20.4449	0	0	0	1.02066	0	0.204439	3.2464	0	1.32994
srna4401	TGAGGTAGTAGTTTGTACAGTTT	23	1	hsa-let-7g-5p:1-20(1)	46.3131	0	2.44741	0	4.56659	23.6342	29.5411	8.55408	7.99555	17.8696	6.00709	8.07466	12.4609	10.1739	29.6825	7.54559	0	0.668875	5.20531	0	0.294174	0.366741	0.261376	33.1158	3.88336	10.1448	8.66694	9.72716	21.3636	1.66454	6.40281	25.5438	41.4464	17.6559	26.7162	0	0	0	0.212047	0.816525	18.6717	9.19977	7.18846	7.8096	6.4597
srna23831	TGAGGTAGTAGTTTGTACAGG	21	1	hsa-let-7g-5p:1-20(1)	0.83447	0	0.543868	0	0.217457	1.5289	3.55062	0.633636	1.8713	2.62788	4.2403	2.12491	1.99649	1.82428	2.80524	3.26296	0	0.334437	0.325332	0	0.588349	0	2.87514	7.56349	0	2.14602	2.16673	4.86358	3.48612	1.30785	0.970123	1.94355	4.5332	3.49013	5.72491	0	0	3.48092	1.06024	0.408262	0.739474	2.24883	2.08697	1.64413	1.13995
srna1378	TGAGGTAGTAGTTTGTACAG	20	1	hsa-let-7g-5p:1-20(1)	22.5307	22.7134	52.7552	0	21.7457	32.0431	76.0542	48.4731	37.0857	46.1631	53.5338	33.7861	79.5844	64.7619	47.4238	68.2162	10.6294	12.3742	27.2194	0	9.41358	2.56719	28.49	102.414	0	46.237	46.5848	62.5317	57.5656	40.7812	18.9174	59.1394	69.2932	110.452	75.1177	11.4492	6.09778	23.5929	13.359	13.8809	41.7803	52.9498	48.0004	34.9377	30.0186
srna7919	TGAGGTAGTAGTTTGTACAGA	21	1	hsa-let-7g-5p:1-20(1)	18.7756	0.873592	3.12724	0	0	3.50372	11.788	19.9595	10.2071	9.19758	14.6644	11.687	14.3197	8.63024	9.74254	7.64755	0	1.67219	1.95199	0	0	0	10.7164	8.99442	0	2.53621	7.58357	0.347398	16.0898	1.18896	3.9775	2.2212	1.619	20.5302	3.64312	0	0	6.96184	7.20961	1.02066	4.43684	0.408878	11.8262	1.50712	1.51993
srna44343	TGAGGTAGTAGTTTGTACAGTAA	23	1	hsa-let-7g-5p:1-21(1)	0	17.4718	4.35094	0	0	0.063704	1.20721	1.90091	0	1.75192	3.18023	0.637473	4.54374	1.89444	2.72943	0.40787	0	0	0	0	0.882523	0	0	4.70163	0	0	0	7.29537	0.0893876	0	0	0	0	0	0.346964	0	0	0	0	0	0.739474	0	2.55074	0.411032	2.37489
srna34396	TGAGGTAGTAGTTTGTCCAGT	21	1	hsa-let-7g-5p:1-21(1)	0.417235	0.873592	1.76757	0	0.65237	0.382224	0.568099	0.316818	0.170118	0.262788	0.353358	0	0.137689	0	0	0	0	0	0	0	0	0	0	11.6519	0	5.07241	4.06263	4.51618	8.22366	0.118896	0.194025	0.5553	0	0	0.346964	0	0	0.773538	0.424095	0.408262	0.924342	1.22664	0.463772	0.137011	0.0949955
srna4692	TGAGGTAGTAGTTTGTACAGTA	22	1	hsa-let-7g-5p:1-21(1)	18.7756	1.74718	8.29399	0	0	7.32596	20.2385	8.8709	5.27366	6.83249	11.8375	14.8744	35.1796	19.7864	8.52946	16.2128	0	0	0	0	7.94271	0	8.62541	20.8507	0	3.12149	5.14599	3.47398	20.2016	4.04246	2.3283	12.7719	20.0756	22.9938	28.4511	0	0	0	1.06024	0	18.4868	13.0841	10.4349	8.08363	4.93977
srna29847	TGAGTTAGTAGTTTGTACAGT	21	1	hsa-let-7g-5p:1-21(1)	7.51023	3.49437	7.61415	0	5.43641	1.08297	2.48543	1.58409	1.53106	1.22634	3.53358	4.6748	4.40606	2.73642	0.0379087	0.101967	0	0	5.74753	0.683038	4.70679	1.46697	4.18202	0	0	0	0	0	0.0893876	0	0	0	0	0	0	2.45339	8.13038	6.1883	5.08914	5.30741	1.66382	1.83995	1.15943	0.959074	0.949955
srna184	TGAGGTAGTAGTTTGTACAGT	21	1	hsa-let-7g-5p:1-21(1)	237.407	187.822	205.31	0	156.569	461.408	861.806	442.911	489.26	577.433	705.657	654.047	827.925	616.536	595.963	751.194	42.5178	41.4702	224.262	6.14734	214.159	66.7469	227.92	1300.31	81.5505	567.915	361.032	772.962	834.612	253.248	294.238	598.058	503.509	899.837	955.019	80.1442	140.249	187.583	163.913	188.413	595.461	618.02	662.73	382.808	413.895
srna24473	TGAGGTAGTCGTTTGTACAGT	21	1	hsa-let-7g-5p:1-21(1)	8.76194	3.49437	3.80708	0	3.26185	11.9126	12.9242	5.06909	9.01626	11.1247	0	0	0.206534	0	0	0.101967	0	0	0.108444	0	0.294174	0	0	0.204419	0	0	0	0	0.0893876	0	0.291037	1.1106	0.6476	0.205302	0.86741	0.817798	2.03259	3.86769	4.0289	3.47023	11.0921	11.2442	11.3624	5.61743	6.17471
srna13508	CTGAGGTAGTAGTTTGTACAGT	22	1	hsa-let-7g-5p:1-21(1)	0.417235	0	5.43868	0	0	3.63113	5.68099	6.65318	4.59319	2.01471	1.94347	5.94975	3.92414	6.45514	3.29806	6.22001	0	0.334437	0	0	0	0.733483	0	18.3977	0	4.48714	8.66694	12.1589	6.25713	0	1.16415	5.83065	0	10.2651	7.11276	0	0	0	0	3.67436	1.66382	0	1.6232	1.2331	2.84987
srna43155	TGAGGTAGTAGTTTGTACAGTTC	23	1	hsa-let-7g-5p:1-22(1)	0	0	1.2237	0	0	3.2489	0.355062	0	0.340236	0.43798	0	0.212491	0	0.631481	3.26015	3.77279	0	0.668875	0	0	0	0	0	0	0	0.195093	0	0	0	0	0	0	0	0	2.60223	0	0	0	0	5.9198	0.554605	0.204439	2.31886	0.822064	0
srna20985	TGAGGTAGTAGTTTGTCCAGTT	22	1	hsa-let-7g-5p:1-22(1)	2.08618	0	1.90354	0	1.30474	0.700744	1.06519	0.316818	0.170118	0.350384	1.41343	0	0.206534	0.0701646	0	0	0	0	0	0	0	0	0	15.5358	0	8.1939	7.31273	7.99016	15.5534	0	0.194025	0.27765	0.3238	0.615905	0	3.27119	0	1.93384	0.636142	2.04131	1.66382	0	0.927544	0.137011	0.664969
srna14197	TGAGGTAGTCGTTTGTACAGTT	22	1	hsa-let-7g-5p:1-22(1)	9.59641	0.873592	5.30271	0	4.78404	30.0683	27.1977	12.6727	11.9083	16.3805	0	0.424982	0.137689	0	0.151635	0.203935	0	0	0.216888	0	0	0	0	0.204419	0	0	0	0	0.178775	0.237792	0.291037	0.83295	0.6476	0.615905	1.56134	4.08899	0	5.028	1.90843	3.67436	16.2684	21.2617	15.7682	7.39857	12.2544
srna46451	TGAGGTAGTGGTTTGTACAGTT	22	1	hsa-let-7g-5p:1-22(1)	0	0	0.271934	0	0	1.21038	2.34341	0.316818	0.680472	0.700768	0.353358	0.212491	3.09801	0.140329	2.80524	0.305902	0	0	0.108444	0.683038	0.294174	0.366741	0	0.817675	0	0.195093	0	1.0422	1.51959	2.14012	0.0970123	0	8.4188	0	0	0	0	0.386769	0	0	1.10921	0.408878	4.17395	2.46619	2.1849
srna615	TGAGGTAGTAGTTTGTACAGTTA	23	1	hsa-let-7g-5p:1-22(1)	155.629	51.5419	79.8126	0	10.8728	114.221	177.389	136.232	80.636	129.642	218.906	270.076	273.382	222.492	114.029	102.171	0	15.3841	22.6648	0	26.1815	19.4373	39.7292	209.938	0	132.663	117.004	99.0086	180.742	37.69	41.6183	210.459	119.158	213.924	319.901	0	4.06519	28.6209	39.8649	49.808	159.911	136.974	158.378	36.8559	82.0761
srna121	TGAGGTAGTAGTTTGTACAGTT	22	1	hsa-let-7g-5p:1-22(1)	340.047	45.4268	333.119	0	264.427	1241.72	1538.98	690.663	742.395	846.703	1408.13	1170.19	1144.75	1201.5	1450.84	926.476	24.802	86.9537	245.951	41.6653	337.712	106.355	227.659	1956.7	100.967	862.505	644.874	973.41	1546.05	337.902	425.593	1002.32	787.805	1110.48	1584.06	67.8772	42.6845	250.24	104.327	233.322	1065.4	974.153	1002.21	503.103	640.27
srna35413	TGAGGTAGTAGTTTGTACAGTTAA	24	1	hsa-let-7g-5p:1-22(1)	0	0	0	0	0	3.2489	0.781136	0	0	0.350384	11.1308	0.637473	5.30104	3.3679	0.947718	1.32558	0	0	0	0	0	0	0.261376	3.06628	0	3.31658	0	0	3.12857	0.118896	0	0	0	0	0.520446	0	0	0	0	7.75698	0	2.24883	1.39132	0	0.379982
srna12899	CTGAGGTAGTAGTTTGTACAGTT	23	1	hsa-let-7g-5p:1-22(1)	0	13.1039	2.31144	0	0	7.64448	8.66351	1.90091	6.12425	0.087596	4.41698	0	1.92765	4.28004	7.05102	7.23969	0	1.33775	0	0	7.64854	0	0	7.35907	0	7.60862	0	0	9.92202	0.475583	0.679086	4.16475	3.238	9.23857	11.6233	0	0	0	0	0.204131	0.739474	7.15537	7.18846	1.2331	1.80491
srna17165	TGAGGTAGTAGTTTGTACAGTTG	23	1	hsa-let-7g-5p:1-22(1)	0	0	7.75012	0	0	2.03853	7.31427	3.16818	0.170118	4.11701	1.23675	8.07466	2.34072	8.48991	4.54905	1.73345	0	0	0.542219	0	2.3534	0	9.40954	8.17675	0	0.585278	5.14599	0	4.91632	0	0	0.27765	0.9714	5.74845	5.89839	0	0	0	0	6.12393	1.47895	0.613318	1.39132	0.411032	0.379982
srna19605	TGAGTTAGTAGTTTGTACAGTT	22	1	hsa-let-7g-5p:1-22(1)	9.59641	0.873592	8.02205	0	11.5252	2.80298	3.69264	0.633636	2.21154	2.71548	6.71381	5.09978	5.43872	5.7535	0.0758174	0.101967	0	0	6.61508	2.04911	6.17766	2.93393	5.4889	0.204419	0	0	0	0	0.0893876	0	0	0	0	0.205302	0	3.27119	0	8.89569	3.81685	8.98177	3.69737	2.24883	1.85509	1.64413	1.70992
srna33672	TGAGGTAGTAGGTTGTACAGTT	22	2	hsa-let-7g-5p:1-22(1);hsa-let-7a-5p:1-22(1)	0	0	0.407901	0	0.217457	1.97482	3.69264	2.21773	0.510354	1.48913	2.82687	3.18737	2.34072	3.64856	3.22224	2.03935	0	0	0.650663	0	0.294174	0	0.261376	0.817675	0	0.390186	0.270842	0.694797	0.625713	0.118896	0.388049	1.6659	0.3238	1.43711	1.9083	0	0	0	0	0	1.47895	1.22664	2.55074	0.274021	1.89991
srna25219	TGAGGTAGTAGTTTGTATAGTT	22	3	hsa-let-7g-5p:1-22(1);hsa-let-7f-5p:1-22(1);hsa-let-7a-5p:1-22(1)	0.417235	0	0.815802	0	0.434913	2.42075	5.32593	1.26727	1.8713	2.36509	2.29683	2.12491	2.89147	3.15741	8.83273	6.11804	0	0	0	0	0	0	0	1.22651	0	1.95093	0.270842	0.347398	0.804488	0.237792	0.194025	0.83295	0.3238	7.39086	1.21437	0	0	0.386769	0.212047	0.408262	3.32763	2.45327	3.2464	0.959074	1.04495
srna36083	GAGGTAGTAGTTTGTAC	17	1	hsa-let-7g-5p:2-18(1)	0.417235	0	1.35967	0	1.08728	1.5926	1.7043	3.16818	0.680472	1.22634	0.353358	1.06246	3.09801	1.96461	3.4876	1.52951	3.54315	0.668875	0.325332	0.683038	0.588349	0	0	0.817675	0	0.585278	0.541683	0.347398	2.8604	0.475583	0.291037	0.83295	1.619	2.25832	1.73482	3.27119	0	2.70738	0.636142	7.96112	2.9579	2.65771	2.55074	0.548042	0.284987
srna22397	GAGGTAGTAGTTTGTACA	18	1	hsa-let-7g-5p:2-19(1)	0.83447	2.62078	5.71061	0	2.17457	1.91112	4.97086	4.75227	1.02071	1.92711	1.94347	3.82484	6.12717	3.50823	2.31243	1.93738	3.54315	0	0.867551	0	0.294174	0	1.30688	2.65744	0	0.975464	1.08337	1.73699	1.16204	0.475583	0.485062	2.2212	0.3238	4.92724	4.33705	0	0	1.93384	5.72528	3.87849	4.06711	1.63551	6.26092	2.05516	1.13995
srna19738	GAGGTAGTAGTTTGTACAG	19	1	hsa-let-7g-5p:2-20(1)	1.25171	0.873592	3.80708	0	1.73965	3.1215	3.83467	1.90091	2.04142	3.32865	3.35691	2.3374	5.36988	2.87675	3.52551	2.85509	0	0	1.08444	0	1.76505	0.733483	2.09101	5.72372	0	2.14602	1.35421	2.43179	2.94979	1.42675	1.45518	2.49885	4.2094	4.72194	2.25527	0.817798	0	1.16031	0.84819	1.22479	3.14276	3.88435	3.71017	2.05516	2.1849
srna4392	GAGGTAGTAGTTTGTACAGT	20	1	hsa-let-7g-5p:2-21(1)	13.7688	5.24155	9.65366	0	7.17607	13.1867	24.0022	14.5736	11.0577	14.9789	17.8446	16.9993	19.7584	17.5411	16.187	19.2718	0	2.34106	6.61508	0	6.76601	1.46697	5.75027	29.8451	0	11.7056	10.292	13.8959	18.8608	4.28025	5.72373	14.1601	11.0092	18.2718	20.2974	2.45339	12.1956	10.056	9.54213	11.8396	17.5625	15.5374	15.5364	8.22064	10.5445
srna19775	GAGGTAGTAGTTTGTACAGTTA	22	1	hsa-let-7g-5p:2-22(1)	7.093	7.86233	3.67111	0	0.217457	2.73927	3.12454	3.485	1.8713	2.54028	6.00709	5.09978	5.16335	5.19218	2.19871	2.14132	0	0	0.542219	0	0.882523	0	0.522752	5.51931	0	1.36565	2.43758	3.12659	4.29061	0.83227	0.873111	2.49885	1.2952	2.87422	5.55142	0	0	1.16031	1.90843	1.83718	3.5125	4.08878	3.94206	0.548042	1.51993
srna2674	GAGGTAGTAGTTTGTACAGTT	21	1	hsa-let-7g-5p:2-22(1)	16.6894	1.74718	13.7327	0	13.9172	32.1705	36.3583	22.4941	18.5429	22.9502	33.039	27.6238	28.1574	31.0829	40.8277	24.5741	0	4.34769	6.94041	1.36608	6.17766	3.66741	10.455	48.4472	0	21.6553	15.1671	20.4965	30.4812	6.18258	8.24605	22.4896	13.9234	21.9673	29.4919	2.45339	0	11.6031	4.66504	9.7983	28.6546	26.986	32.6959	12.1939	15.0093
srna13068	AGGTAGTAGTTTGTAC	16	1	hsa-let-7g-5p:3-18(1)	12.5171	13.9775	0.679835	0	0.434913	2.80298	4.47378	8.23727	0	0.087596	3.00355	4.88729	11.7036	1.47346	11.1073	3.26296	0	1.00331	0	0	0	0	0	4.49721	0	3.51167	9.7503	7.29537	12.3355	0	2.23128	4.9977	1.9428	6.56965	11.4498	0	0	2.32061	2.12047	1.02066	6.84013	0.408878	1.6232	0	0
srna38452	AGGTAGTAGTTTGTACAGT	19	1	hsa-let-7g-5p:3-21(1)	0.83447	1.74718	2.17547	0	0.869826	1.27408	3.19556	0.950454	1.53106	1.83952	1.76679	2.54989	1.92765	1.75411	0.454905	1.52951	0	0	0.542219	0	1.1767	0	0.261376	3.06628	0	1.36565	0.541683	1.38959	1.60898	0.118896	0.679086	1.1106	1.2952	1.02651	2.77571	0	0	1.54708	0.636142	1.83718	0.554605	1.22664	1.6232	1.37011	0.759964
srna22350	AGGTAGTAGTTTGTACAGTT	20	1	hsa-let-7g-5p:3-22(1)	2.08618	0	3.53514	0	1.73965	4.26817	4.89985	3.16818	2.38165	2.97826	2.82687	7.43719	3.02916	2.80658	2.99479	1.01967	0	0.334437	0.975995	0	1.1767	0.733483	0.522752	3.2707	0	2.34111	2.16673	3.12659	4.64816	0.594479	1.16415	2.7765	1.619	2.05302	3.29616	0	0	1.93384	0.636142	1.42892	2.77303	2.65771	3.94206	1.2331	1.89991
srna19235	GGTAGTAGTTTGTAC	15	1	hsa-let-7g-5p:4-18(1)	1.66894	1.74718	0.679835	0	0.65237	1.14667	3.69264	5.70272	0.340236	0.175192	1.76679	2.12491	8.3302	4.5607	7.73338	2.75312	0	0.668875	0.108444	0	0	0	0.261376	1.02209	0	0.585278	2.97926	1.0422	11.1735	0.237792	0.485062	1.6659	0	1.43711	3.8166	1.6356	0	0.386769	1.06024	1.02066	2.03355	0.204439	0.695658	0	0
srna28939	TGCGGTAGTAGTTTGTACAGT	21	1	hsa-let-7g-5p:4-21(1)	8.3447	6.11514	7.34222	0	5.43641	0.573336	0.92316	0.316818	1.19083	0.525576	7.95057	7.2247	9.77593	6.66564	0	0.101967	0	0	0.325332	0	0.294174	0	0	0.408837	0	0.195093	0	1.73699	0.804488	0	0.0970123	0	0	0	0	2.45339	8.13038	6.57507	3.81685	5.10328	0.184868	0.408878	0.231886	0.685053	0.0949955
srna11932	GGTAGTAGTTTGTACAGT	18	1	hsa-let-7g-5p:4-21(1)	4.17235	3.49437	5.43868	7.39295	4.56659	3.50372	4.68681	3.485	3.23224	3.94182	6.53713	4.46231	3.71761	4.28004	3.63924	4.9964	0	0.668875	2.16888	0	1.47087	1.10022	2.09101	18.8065	0	5.26751	4.60431	10.0746	10.2796	1.78344	3.20141	4.16475	4.2094	5.33784	5.72491	1.6356	8.13038	4.25446	4.0289	3.87849	2.9579	3.27103	5.33338	1.78114	1.99491
srna16599	TGCGGTAGTAGTTTGTACAGTT	22	1	hsa-let-7g-5p:4-22(1)	10.8481	0	10.8774	0	8.48081	1.97482	1.1362	0.633636	0.680472	0.87596	18.9047	15.5118	13.4935	13.3313	0.151635	0.101967	0	0	0.325332	0	0.294174	0	0.261376	1.02209	0	1.56074	0.541683	0.694797	1.78775	0	0	0.27765	0	0.205302	0.173482	0.817798	0	7.73538	4.0289	5.30741	0.739474	1.0222	2.55074	0.822064	0.759964
srna8604	GGTAGTAGTTTGTACAGTT	19	1	hsa-let-7g-5p:4-22(1)	9.17917	4.36796	9.38172	0	6.95861	7.77189	7.66933	8.55408	2.89201	4.02942	7.24385	6.37473	6.54024	6.87613	9.93208	6.42395	3.54315	1.67219	2.49421	0	2.3534	1.46697	1.0455	20.6463	7.76672	4.87732	5.41683	7.64277	13.3188	2.61571	2.61933	6.1083	4.857	9.44387	13.0112	1.6356	2.03259	6.96184	2.75662	6.94046	5.36118	4.90654	6.02903	2.46619	3.98981
srna40382	GTAGTAGTTTGTACAGT	17	1	hsa-let-7g-5p:5-21(1)	2.08618	0.873592	3.39917	0	2.39202	0.700744	1.56227	0.633636	0.170118	1.13875	1.76679	1.91242	1.10151	2.1751	0.720266	0.815739	0	0	0.650663	0	0.294174	1.10022	0.261376	2.04419	0	1.36565	0.812525	1.73699	1.96653	0.475583	0.679086	2.2212	0.6476	2.25832	1.04089	1.6356	2.03259	2.32061	1.48433	2.85784	1.10921	0.817757	1.85509	0.685053	0.664969
srna35469	TGATGTAGTAGTTTGTACAGT	21	1	hsa-let-7g-5p:5-21(1)	0.417235	0.873592	0.679835	0	0	4.26817	8.45047	4.11863	3.57248	4.99297	2.29683	1.91242	2.6161	1.68395	0	0.101967	0	0	0.325332	0	0	0	0.261376	1.22651	0	0	0.812525	0.347398	0.625713	0	0	0	0	0.410603	0.346964	0	0	0.386769	0	0	7.20987	7.15537	6.02903	3.69929	3.41984
srna20004	TGATGTAGTAGTTTGTACAGTT	22	1	hsa-let-7g-5p:5-22(1)	0	0.873592	0.407901	0	0.217457	11.5304	17.9661	6.33636	6.46449	8.7596	3.18023	5.31228	3.57992	3.50823	0.0758174	0	0	0	0.867551	0	0.294174	0	0.522752	1.22651	0	0.195093	0.812525	0.347398	1.07265	0	0	0.27765	0	0.205302	0	0	0	0.386769	0.212047	0.204131	9.79803	8.79089	8.81166	6.57651	7.50465
srna26089	GTAGTAGTTTGTACAGTT	18	1	hsa-let-7g-5p:5-22(1)	6.25853	0	3.94304	0	3.91422	2.10223	3.40859	0.633636	1.19083	1.57673	2.47351	3.39986	2.40956	3.43806	2.38825	1.42754	0	0.334437	0.759107	0	0.882523	0.366741	0.784128	3.47512	3.88336	0.780371	1.35421	1.73699	2.59224	0.356687	0.485062	0.83295	2.2666	1.64241	2.42875	3.27119	0	3.09415	1.27228	2.85784	1.47895	3.47547	3.01452	0.822064	1.23494
srna39592	GAGTTAGTAGTTTGTACAGTT	21	1	hsa-let-7g-5p:6-22(1)	8.76194	0	5.30271	0	3.04439	1.27408	1.98835	1.58409	0.510354	0.788364	3.18023	3.82484	2.6161	3.57839	0.113726	0.101967	0	0	1.40977	0	1.76505	0.366741	1.30688	0	0	0	0	0	0.0893876	0	0	0	0	0	0	0.817798	2.03259	8.89569	2.75662	5.10328	0.739474	1.83995	2.08697	0.685053	1.04495
srna2558	CTGCGCAAGCTACTGCCTTG	20	1	hsa-let-7i-3p:1-20(1)	0	0	3.94304	0	9.56809	14.5882	27.2687	20.2763	42.1893	39.681	25.7952	43.7732	28.4328	21.8212	5.38304	6.11804	49.6041	2.34106	35.5696	25.9554	16.4738	2.93393	0	43.5412	0	44.4812	46.5848	78.1647	18.7714	36.2632	31.626	15.2707	28.1706	15.8082	29.145	0	75.206	14.3105	8.90599	6.12393	24.0329	31.2792	34.3191	71.7936	62.697
srna12586	TGAGGTAGTAGTTTG	15	2	hsa-let-7i-5p:1-15(1);hsa-let-7g-5p:1-15(1)	0	0	2.44741	0	2.82694	7.19855	7.95338	4.75227	4.08283	9.72316	10.6008	4.46231	9.43171	2.59609	3.26015	7.23969	0	2.6755	0.433775	0	0	0.733483	0.522752	3.2707	0	1.36565	0.541683	1.38959	7.77672	1.78344	1.94025	8.60715	0.6476	10.0598	2.77571	0.817798	0	0.773538	2.75662	4.69502	6.28553	8.58645	9.50732	3.28825	3.70483
srna23984	TGAGGTAGTAGTTTGTG	17	1	hsa-let-7i-5p:1-17(1)	1.25171	0	0	0	1.73965	2.35705	4.11872	1.58409	1.36094	4.02942	2.65019	5.31228	5.78295	4.13971	1.44053	1.73345	0	1.33775	0.325332	0	0.294174	0.366741	0.261376	1.43093	0	1.56074	0.541683	1.0422	2.32408	0.951166	1.74622	1.6659	1.2952	0.410603	3.99009	1.6356	0	1.16031	1.48433	3.2661	6.65526	5.31542	2.55074	3.97331	3.03986
srna3251	TGAGGTAGTAGTTTGTGC	18	1	hsa-let-7i-5p:1-18(1)	1.25171	0.873592	13.3248	0	7.17607	23.3157	41.3292	25.0286	11.9083	27.0672	29.1521	23.799	43.3033	15.1556	24.7544	21.5151	3.54315	15.7186	1.19288	0	2.3534	1.83371	2.09101	15.5358	0	16.3878	13.5421	15.6329	17.3412	3.32908	18.0443	25.8214	16.19	16.0135	14.052	28.6229	2.03259	27.8474	9.54213	18.3718	39.9316	30.0526	25.9712	25.758	26.7887
srna15247	TGAGGTAGTAGTTTGTGCG	19	1	hsa-let-7i-5p:1-18(1)	1.25171	0.873592	0.951769	0	1.5222	2.42075	6.39111	3.16818	3.23224	4.81778	6.53713	4.6748	6.19602	2.24527	5.19349	7.03575	0	0.668875	0.216888	0	0.588349	1.10022	2.61376	6.95024	0	4.87732	1.89589	6.25317	4.29061	4.04246	1.94025	3.60945	4.2094	3.69543	3.12268	3.27119	0	5.41477	1.69638	3.2661	4.62171	4.29322	10.6668	3.69929	2.84987
srna42069	TGAGTTAGTAGTTTGTGCT	19	1	hsa-let-7i-5p:1-19(1)	5.42406	0	6.25448	0	5.43641	0.31852	1.98835	1.26727	0.850591	1.31394	1.41343	3.18737	4.33721	1.61379	0	0	0	0	1.19288	0	2.05922	0.733483	0.261376	0	0	0	0	0	0	0	0	0	0	0	0	4.08899	2.03259	15.084	2.12047	12.6561	1.29408	0.613318	1.39132	0.822064	1.13995
srna20069	TGAGGTAGTAGTTTGTGCTA	20	1	hsa-let-7i-5p:1-19(1)	0	0	4.21498	0	0	3.56742	2.41442	5.70272	1.8713	1.66432	3.18023	4.24982	3.8553	3.99938	4.85232	1.52951	3.54315	0	0.108444	0	0	10.6355	3.65926	0	0	0.195093	13.0004	0	0.983264	1.07006	2.42531	7.7742	0	2.25832	3.12268	0	0	5.028	0	0	6.10066	0	2.08697	2.19217	1.89991
srna293	TGAGGTAGTAGTTTGTGCT	19	1	hsa-let-7i-5p:1-19(1)	98.8847	29.7021	179.205	0	167.224	302.275	628.033	458.436	246.161	539.153	459.189	553.539	708.755	355.033	320.025	369.428	42.5178	40.8014	39.4736	0.683038	69.4252	13.2027	39.2064	498.168	23.3002	289.713	265.425	468.641	301.326	219.244	128.444	310.968	192.337	407.524	319.901	103.86	36.5867	352.347	45.8022	341.511	557.933	555.461	665.744	310.466	327.735
srna29924	TGAGGTAGTCGTTTGTGCT	19	1	hsa-let-7i-5p:1-19(1)	1.66894	0.873592	4.48691	0	1.95711	10.766	10.0127	6.33636	3.06213	9.72316	0.176679	0	0.0688446	0	0	0	0	0	0	0	0	0	0	0	0	0	0	0	0	0.594479	0.194025	0	0	0.205302	0	1.6356	0	5.80153	0.636142	6.94046	10.9072	11.2442	8.34789	3.56228	4.93977
srna15589	TGAGGTAGTAGTTTGTGCTGA	21	1	hsa-let-7i-5p:1-20(1)	7.51023	11.3567	6.79835	0	0	0.700744	1.1362	0.950454	2.21154	4.4674	0	0	4.81912	4.63086	5.98958	1.01967	0	0	0	0	0.588349	0	0	4.90605	0	2.14602	0.270842	11.4641	6.88285	0.83227	3.78348	7.7742	11.9806	0	3.8166	0	0	0	0	0	1.29408	0	5.79715	2.05516	2.84987
srna10782	TGAGGTAGTAGTTTGTGCTGTTATT	25	1	hsa-let-7i-5p:1-20(1)	0	0	1.2237	0	0	17.7734	9.7997	3.485	2.89201	3.76663	0	7.86217	5.30104	5.05185	14.2158	2.95705	0	0.334437	0.108444	0	0	0	0	2.04419	3.88336	4.87732	0.541683	0.347398	6.34652	1.30785	0.776098	2.2212	24.285	13.9605	13.1846	0	0	1.54708	0	0	9.42829	2.24883	5.56526	0.959074	2.1849
srna18404	TGAGGTAGTAGTTTGTGCTGG	21	1	hsa-let-7i-5p:1-20(1)	0.83447	0.873592	1.08774	0	0	2.16594	1.63328	1.26727	3.06213	3.24105	4.06362	0.424982	1.30805	1.54362	4.54905	5.71017	0	0.668875	1.30133	0	3.53009	2.20045	1.30688	4.90605	0	5.26751	2.16673	8.33756	4.46938	2.25902	8.92513	2.2212	1.619	2.05302	2.60223	0	0	0	0.212047	0.612393	1.84868	1.83995	1.6232	4.11032	5.79473
srna1335	TGAGGTAGTAGTTTGTGCTGTTT	23	1	hsa-let-7i-5p:1-20(1)	8.3447	1.74718	4.07901	0	9.35063	110.335	87.7002	40.5527	62.7736	79.0116	23.3217	24.8615	17.9684	24.4173	107.964	30.7942	3.54315	15.3841	24.8336	0.683038	15.2971	8.06831	0.784128	49.0605	0	30.4345	56.6059	73.9959	134.886	18.4288	126.795	49.4217	43.3892	5.54314	38.6865	0	44.7171	16.6311	0	0	52.3178	27.5993	36.1742	55.3523	80.0812
srna404	TGAGGTAGTAGTTTGTGCTG	20	1	hsa-let-7i-5p:1-20(1)	90.54	17.4718	101.295	0	141.129	99.8242	196.065	153.974	147.492	319.988	252.298	201.654	198.892	203.547	276.43	364.126	77.9492	44.4802	221.659	6.14734	137.674	76.649	95.925	445.224	7.76672	281.129	234.549	323.081	224.72	189.758	243.792	191.301	151.862	150.691	161.859	19.6271	0	68.8449	41.5613	53.4824	138.466	292.961	158.842	237.576	340.369
srna41052	TGAGGTAGTAGTTTGTGCTGTG	22	1	hsa-let-7i-5p:1-21(1)	0	0	0	0	0	0.891856	1.42025	0.633636	1.19083	0.700768	1.41343	0.849964	1.65227	0.77181	2.23661	0.509837	0	0	0.975995	0.683038	0	0	0.522752	3.2707	0	2.7313	2.43758	1.38959	2.50285	0.475583	5.33568	0.27765	1.2952	0.615905	2.42875	0	0	0	0	0	0.554605	0.613318	0.927544	1.78114	1.42493
srna36486	TGAGGTAGTAGTTTGTGCTGTAA	23	1	hsa-let-7i-5p:1-21(1)	2.50341	0	0	0	0	0.573336	1.20721	0	0	0	0	0.212491	1.44574	1.12263	2.1608	0	0	0	0	0	0	0	0	0.204419	0	0.780371	0.812525	1.38959	3.84367	0	1.26116	0	0	0	10.7559	0.817798	0	0	0	0	2.40329	0	0.695658	0.274021	0.0949955
srna5992	TGAGGTAGTAGTTTGTGCTGTTAT	24	1	hsa-let-7i-5p:1-21(1)	35.8822	0.873592	3.94304	0	12.8299	15.8623	11.646	8.23727	3.91272	4.2922	6.89049	7.2247	2.13418	7.01646	18.4236	7.44362	3.54315	6.35431	12.6879	0	1.76505	13.2027	1.30688	9.19884	0	10.3399	6.22936	4.86358	17.7881	5.35031	3.78348	4.4424	21.6946	5.13254	13.3581	0	0	37.1298	0	0	14.05	6.54206	1.6232	0.274021	7.31466
srna6136	TGAGGTAGTAGTTTGTGCTGTA	22	1	hsa-let-7i-5p:1-21(1)	0	0	9.10979	0	5.43641	5.16002	11.646	4.43545	10.7174	13.8402	8.65728	5.09978	10.189	16.1379	13.7988	4.3846	0	2.00662	6.28974	0	2.3534	0	12.0233	14.9226	0	6.82825	12.4587	19.8017	12.6037	2.49681	10.2833	3.8871	14.2472	14.1658	19.9504	0	0	0	0.212047	0	8.13421	11.4486	1.85509	8.49466	7.02967
srna463	TGAGGTAGTAGTTTGTGCTGT	21	1	hsa-let-7i-5p:1-21(1)	57.9957	73.3817	67.5756	0	69.5861	135.881	147.777	95.9958	208.565	319.988	213.429	75.4343	101.683	163.062	239.924	262.158	53.1472	38.4603	116.794	8.19645	121.494	47.3096	78.6742	406.793	3.88336	338.681	170.901	221.988	244.118	161.579	427.921	116.335	79.331	118.87	145.031	28.6229	0	35.5827	43.6818	32.2527	102.047	162.325	105.74	304.301	372.857
srna32762	TGAGGTAGTAGTTTGTGCTGTTAC	24	1	hsa-let-7i-5p:1-22(1)	0	0	0	0	0.217457	1.01926	6.53314	0	0	1.66432	1.59011	2.3374	2.34072	2.03477	4.70068	0.815739	0	0.334437	4.4462	12.2947	0	0	0	4.90605	0	1.75584	0	0	0.804488	0	1.64921	0	4.857	0	0	0	0	0	0	4.08262	0	2.86215	0	0	0
srna13165	TGAGGTAGTAGTTTGTGTTGTT	22	1	hsa-let-7i-5p:1-22(1)	2.08618	0	2.58337	0	3.04439	7.58078	7.38528	4.11863	7.82543	3.85422	5.47706	5.52477	2.27187	5.40267	5.95167	3.56886	0	0.668875	1.62666	0.683038	2.94174	1.46697	1.30688	7.35907	0	4.09695	2.16673	5.21098	4.46938	1.18896	10.5743	1.94355	4.857	4.10603	5.72491	0	0	1.16031	0.212047	0.204131	3.5125	4.90654	2.31886	6.4395	6.93467
srna5551	TGAGGTAGTAGTTTGTGCTGTTAA	24	1	hsa-let-7i-5p:1-22(1)	0	3.49437	3.26321	0	7.39352	10.766	12.7822	10.455	2.21154	3.50384	37.1026	18.6992	4.61259	19.6461	9.81836	15.499	0	0	7.1573	0	0	0	21.1715	13.6961	0	4.09695	6.22936	7.29537	11.3522	4.87473	3.49244	25.5438	28.8182	19.0931	22.5527	0	0	6.1883	11.2385	8.36938	10.3526	16.3551	13.9132	12.1939	7.02967
srna20918	TGAGGTAGTAGTTTGTGCTGTTC	23	1	hsa-let-7i-5p:1-22(1)	0	0	2.31144	0	0.217457	3.94965	4.47378	0.633636	2.21154	1.83952	0.353358	0.424982	0.89498	1.96461	20.357	6.93378	7.08629	6.68875	0.108444	0	0	0	4.70477	3.2707	0	0	0	0.694797	2.05591	0.118896	0	0	0	0	0.520446	0	0	0	0	0	2.77303	1.22664	1.15943	1.64413	2.0899
srna131	TGAGGTAGTAGTTTGTGCTGTTA	23	1	hsa-let-7i-5p:1-22(1)	504.02	209.662	494.648	0	396.423	892.748	963.779	654.546	459.829	656.006	1077.74	940.273	973.325	1102.92	788.046	601.302	209.046	114.043	572.041	28.6876	693.663	614.659	743.092	1629.83	27.1835	1363.31	1030.01	851.474	1153.19	484.976	620.103	1454.61	1032.6	1112.73	1739.5	135.754	146.347	490.423	266.12	442.148	936.174	660.134	911.08	453.642	549.549
srna12351	TGAGGTAGTAGTTTGTGCTGTTG	23	1	hsa-let-7i-5p:1-22(1)	0	0	0.407901	0	3.69676	3.1852	4.6158	0.633636	7.65531	2.2775	4.77034	6.37473	5.92064	0.77181	7.01311	3.05902	0	2.34106	10.3022	0	0.294174	0.366741	0.522752	7.35907	0	19.3142	0.541683	2.43179	5.09509	5.11252	6.01476	3.3318	1.619	1.84771	1.04089	0	0	1.16031	0.84819	10.2066	3.5125	0.408878	4.63772	3.42527	7.78963
srna8809	TGAGTTAGTAGTTTGTGCTGTT	22	1	hsa-let-7i-5p:1-22(1)	10.8481	14.8511	18.6275	0	28.9217	5.54225	6.53314	3.485	7.31508	7.09528	7.59721	6.16224	5.36988	8.77057	0.151635	0.101967	0	0	31.7741	10.2456	20.5922	14.6697	13.8529	0	0	0.390186	0	0	0.178775	0	0.0970123	0	0	0	0	0	0	13.5369	3.60481	11.2272	2.58816	3.67991	4.40583	8.49466	8.07462
srna29275	TGAGGTAGTAGGTTGTGCTGTT	22	1	hsa-let-7i-5p:1-22(1)	0	0	0.679835	0	0.434913	1.72001	3.26657	0.316818	2.38165	2.71548	4.06362	1.48744	1.78996	2.31543	4.73859	2.03935	0	0	2.92798	0.683038	0.882523	0.366741	1.0455	1.02209	0	0.780371	1.08337	0.347398	1.07265	0.356687	1.74622	0.5553	0	0.205302	0.86741	0	0	0	0	0.204131	2.77303	1.0222	0.231886	2.19217	5.03476
srna67	TGAGGTAGTAGTTTGTGCTGTT	22	1	hsa-let-7i-5p:1-22(1)	364.664	317.988	514.227	0	645.194	2472.1	2144.93	958.374	2351.71	2538.18	1745.77	1110.27	1000.31	1566.35	2662.37	1336.59	400.376	238.788	1188.44	338.104	803.685	776.392	631.746	3471.03	120.384	2282	1632.09	1732.13	3004.14	802.665	4928.52	1336.88	1243.07	992.017	1672.89	12.267	81.3038	434.728	141.436	334.571	1257.48	1218.25	1186.33	2805.02	3279.34
srna8160	TGAGGTAGTCGTTTGTGCTGTT	22	1	hsa-let-7i-5p:1-22(1)	9.59641	3.49437	10.7414	0	11.9601	40.1972	35.2221	13.6232	32.8328	33.1113	0	0	0	0.280658	0.151635	0.101967	0	0	0.216888	0	0.588349	0	0.522752	0.408837	0	0	0.270842	0	0.0893876	0.713375	3.88049	1.38825	0.3238	0.615905	2.08178	0	2.03259	9.28245	2.33252	7.14459	19.2263	17.7862	18.7828	45.4875	53.5775
srna25555	TGAGGTCGTAGTTTGTGCTGTT	22	1	hsa-let-7i-5p:1-22(1)	0.417235	0	0.543868	0	0.65237	11.4667	9.16059	3.80182	12.2485	12.0882	0.530038	0.637473	0.275378	0.841975	0.0379087	0	0	0	0.325332	0	0	0	0	0.408837	0	0.390186	0	0.347398	0.178775	0.118896	0.0970123	0.5553	0	0.205302	0	0	0	0.386769	0	1.02066	7.025	7.35981	5.79715	11.3719	14.3443
srna30280	TGAGGTAGTAGTTTGTACTGTT	22	2	hsa-let-7i-5p:1-22(1);hsa-let-7g-5p:1-18(1)	0.83447	0	0.271934	0	0.65237	2.29334	1.91733	0.633636	2.55177	1.83952	1.94347	0	1.10151	1.33313	2.53988	0.815739	0	0.668875	0.759107	0	0.294174	0.366741	0.784128	4.70163	0	1.95093	0.812525	3.12659	2.68163	0.83227	3.9775	2.2212	0	1.84771	0.86741	0	0	0	0.424095	0.204131	1.66382	1.83995	1.39132	2.6032	2.46988
srna44836	GAGGTAGTAGTTTGTGC	17	1	hsa-let-7i-5p:2-18(1)	0	0	0.951769	0	0.65237	1.21038	2.41442	0.316818	0.680472	1.13875	1.76679	1.48744	2.82263	0.841975	1.85753	0.815739	0	0.334437	0.108444	0	0	0.366741	0	1.02209	0	1.36565	0.270842	1.73699	1.07265	0.237792	0.776098	0.83295	0.9714	0.410603	0.693928	1.6356	0	3.86769	1.06024	2.04131	2.03355	2.24883	2.08697	1.91815	1.04495
srna6498	GAGGTAGTAGTTTGTGCT	18	1	hsa-let-7i-5p:2-19(1)	3.75512	0.873592	10.1975	0	7.61098	9.81042	18.6052	14.2568	8.16567	17.6944	12.7209	14.8744	18.9323	9.61255	9.136	9.58494	0	1.67219	2.16888	0	4.11844	0.733483	1.56826	19.4198	3.88336	9.16936	6.5002	14.9381	9.20692	5.35031	3.20141	4.9977	3.238	7.80146	8.15366	7.36018	0	14.3105	3.39276	18.1677	12.0164	15.7418	21.5654	9.86476	9.02457
srna9442	GAGGTAGTAGTTTGTGCTG	19	1	hsa-let-7i-5p:2-20(1)	3.75512	1.74718	5.84658	0	5.87133	4.07706	6.74617	5.06909	4.59319	8.58441	5.65374	5.73726	5.57641	5.61317	9.17391	9.78887	0	1.67219	8.13329	0.683038	4.11844	2.56719	2.87514	11.8563	0	8.38899	8.12525	6.94797	5.72081	3.32908	7.27592	3.3318	3.8856	3.28483	2.94919	1.6356	2.03259	4.25446	2.54457	2.24544	3.5125	8.17757	6.26092	7.53558	12.3494
srna39185	GAGGTAGTAGTTTGTGCTGTTT	22	1	hsa-let-7i-5p:2-20(1)	0	0.873592	0.135967	0	0.217457	3.37631	1.77531	1.26727	1.8713	2.89067	0.176679	0.637473	0.481912	0.982304	3.67715	0.509837	0	1.00331	0.433775	0	0.294174	0	0	0.204419	0	0.585278	0.270842	2.43179	2.8604	0.475583	2.91037	0.5553	0.6476	0.205302	1.04089	0	4.06519	1.16031	0	0	1.66382	0.408878	1.15943	2.19217	1.80491
srna9779	GAGGTAGTAGTTTGTGCTGT	20	1	hsa-let-7i-5p:2-21(1)	2.92065	0.873592	3.26321	0	4.34913	5.28743	5.96504	4.11863	8.50591	10.5115	7.95057	2.54989	3.51108	5.61317	8.75691	6.93378	0	2.34106	4.66309	0.683038	4.70679	3.66741	3.13651	8.79	0	9.94973	4.60431	6.60057	7.86611	3.09129	11.2534	4.16475	2.2666	4.51664	5.89839	2.45339	0	1.16031	2.96866	2.04131	2.77303	5.92874	3.71017	12.468	9.68954
srna3066	GAGGTAGTAGTTTGTGCTGTTA	22	1	hsa-let-7i-5p:2-22(1)	22.5307	13.1039	26.2416	0	18.7013	23.1883	22.4399	12.6727	11.2278	15.2417	25.0885	21.8866	24.5775	26.873	18.689	14.8872	0	1.33775	17.351	2.04911	15.8854	19.804	23.7852	33.5247	3.88336	26.7277	18.6881	13.8959	23.5089	7.25264	11.1564	24.7108	20.3994	18.4771	32.6146	8.99578	2.03259	25.14	11.2385	23.6792	18.8566	16.9685	22.9567	10.5498	13.9643
srna1390	GAGGTAGTAGTTTGTGCTGTT	21	1	hsa-let-7i-5p:2-22(1)	21.6962	17.4718	23.2504	0	35.228	68.3544	63.9821	25.6623	73.491	70.4272	42.0497	26.3489	26.4363	44.1335	78.2057	43.846	28.3452	11.3709	42.7269	7.51341	29.4174	28.9726	26.1376	82.7896	3.88336	55.7965	43.8764	51.0676	74.8174	18.6666	105.743	36.3721	28.1706	22.3779	35.7373	1.6356	4.06519	24.7532	6.36142	15.9222	39.7467	35.7769	36.1742	83.7135	93.0006
srna33599	AGGTAGTAGTTTGTGCTGTTA	21	1	hsa-let-7i-5p:3-22(1)	2.92065	0.873592	3.67111	0	2.17457	1.6563	1.63328	1.26727	0.340236	1.22634	2.29683	0.849964	1.03267	1.82428	0.568631	0.815739	0	0.334437	1.84355	0	2.3534	0.733483	0.784128	1.02209	0	2.14602	0.812525	1.73699	4.29061	0.237792	0.679086	1.38825	1.2952	1.23181	2.25527	0	2.03259	3.48092	2.96866	2.65371	2.58816	1.63551	1.15943	0.274021	0.569973
srna12363	AGGTAGTAGTTTGTGCTGTT	20	1	hsa-let-7i-5p:3-22(1)	3.75512	0.873592	3.53514	0	6.74115	8.0267	6.03605	3.16818	7.4852	5.69374	5.83041	3.39986	2.75378	3.92922	7.8471	2.34525	3.54315	0.334437	4.01242	0	3.23592	2.56719	2.87514	6.95024	0	4.87732	2.97926	2.43179	10.1902	1.54565	9.31318	2.49885	2.5904	2.05302	2.77571	0.817798	2.03259	3.86769	0.424095	2.65371	5.17632	2.65771	2.78263	6.16548	7.02967
srna30186	TGCGGTAGTAGTTTGTGCT	19	1	hsa-let-7i-5p:4-19(1)	3.33788	1.74718	6.52642	0	5.65387	0.445928	0.852148	0.633636	0	0.700768	3.71026	7.43719	10.2578	5.7535	0.0379087	0	0	0	0.325332	0	0.294174	0	0	0.817675	0	0.195093	0.270842	0.347398	0.178775	0	0	0	0	0	0	2.45339	2.03259	11.6031	1.27228	11.8396	0.554605	1.43107	0.927544	0.685053	1.04495
srna19490	GGTAGTAGTTTGTGCT	16	1	hsa-let-7i-5p:4-19(1)	2.08618	0	5.30271	0	2.39202	2.61186	4.89985	3.80182	0.680472	3.67903	1.76679	2.97487	5.36988	3.43806	2.72943	3.05902	0	0	0.542219	0	0	0.366741	0.261376	8.99442	0	3.51167	3.52094	4.86358	3.5755	1.66454	0.873111	1.1106	2.5904	2.46362	2.60223	2.45339	0	8.50892	1.90843	9.1859	4.25197	5.11098	4.63772	2.6032	2.1849
srna32488	GGTAGTAGTTTGTGCTG	17	1	hsa-let-7i-5p:4-20(1)	2.08618	0.873592	2.71934	0	3.4793	1.01926	1.84632	0.950454	1.36094	1.83952	0.883396	0.637473	0.89498	0.561317	1.93334	2.54918	0	0.334437	1.95199	0	1.47087	0.366741	0.784128	2.45302	0	2.7313	1.89589	1.0422	1.87714	0.951166	4.46257	1.38825	1.619	0.821207	1.38786	0.817798	0	3.09415	1.90843	1.83718	1.10921	1.22664	1.6232	1.91815	1.61492
srna35213	GGTAGTAGTTTGTGCTGT	18	1	hsa-let-7i-5p:4-21(1)	2.50341	1.74718	2.31144	0	1.5222	1.01926	1.56227	0	0.850591	2.36509	2.47351	0.637473	0.619602	0.91214	2.23661	2.34525	0	0.334437	1.19288	0.683038	1.47087	0.366741	0.522752	3.47512	3.88336	2.7313	1.08337	2.08439	0.893876	1.54565	2.81336	0	0	0.615905	1.73482	0.817798	4.06519	0	0.636142	0.408262	0	1.0222	0.463772	1.50712	2.46988
srna10284	TGCGGTAGTAGTTTGTGCTGTT	22	1	hsa-let-7i-5p:4-22(1)	12.9343	13.1039	16.588	7.39295	24.3551	4.26817	3.76365	2.53454	5.10354	4.90538	22.2616	16.5743	13.4935	23.5753	0.30327	0.203935	0	0	2.60265	1.36608	2.3534	1.46697	1.82963	2.86186	0	2.7313	2.16673	2.77919	3.21795	0.237792	0.679086	0.5553	0.6476	0.410603	0.346964	0	2.03259	12.3766	5.08914	12.452	0.369737	2.65771	1.39132	6.30249	7.59964
srna4862	GGTAGTAGTTTGTGCTGTT	19	1	hsa-let-7i-5p:4-22(1)	10.4309	6.11514	14.2765	0	20.4409	13.8875	14.4865	7.92045	13.7796	13.4022	8.4806	5.94975	6.47139	9.19156	20.0537	11.3184	3.54315	3.00994	9.32617	2.73215	7.64854	7.33483	6.79578	24.7347	3.88336	14.4369	7.85441	17.7173	20.2016	5.23141	29.5888	9.4401	10.6854	6.15905	15.9603	1.6356	4.06519	10.056	3.39276	13.6768	9.05855	6.95093	6.95658	14.1121	19.0941
srna41790	TGGGGTAGTAGTTTGTGCTGTT	22	1	hsa-let-7i-5p:4-22(1)	0	0	0.407901	0	0.434913	0.63704	0.426074	0	1.36094	0.963556	0.706717	0	0.619602	0.631481	0.416996	0.203935	0	0	1.51821	0	1.76505	0.733483	1.56826	6.13256	3.88336	4.29204	2.70842	3.82138	3.5755	0.118896	2.23128	0.27765	0	0.410603	0	0	0	0	0	0	0.369737	0.408878	0.695658	0.411032	1.13995
srna42591	GCGGTAGTAGTTTGTGCTGTT	21	1	hsa-let-7i-5p:4-22(1)	3.75512	0.873592	4.48691	0	4.13167	0.891856	0.355062	0	1.02071	1.05115	3.18023	3.39986	2.06534	5.61317	0.113726	0	0	0	1.30133	0	0.882523	0	0.522752	0.817675	0	0.390186	0.812525	0	0.715101	0.118896	0.388049	0	0.3238	0.205302	0.346964	0.817798	2.03259	3.86769	1.69638	3.06197	0.554605	0.204439	0	0.959074	1.04495
srna10746	GGTAGTAGTTTGTGCTGTTA	20	1	hsa-let-7i-5p:4-22(1)	16.6894	4.36796	12.1011	0	12.6125	4.20446	5.11289	3.485	2.38165	2.45269	6.36045	4.46231	3.71761	7.08662	6.14121	2.75312	3.54315	1.67219	3.68709	0	6.17766	6.2346	4.18202	9.60768	0	7.60862	5.68768	3.47398	7.32978	2.14012	2.61933	7.7742	5.1808	4.31133	10.5824	3.27119	6.09778	8.89569	6.99757	10.6148	3.88224	3.06659	6.4928	2.46619	1.99491
srna40904	TGATGTAGTAGTTTGTGCT	19	1	hsa-let-7i-5p:5-19(1)	0	0	0.135967	0	0.217457	2.73927	6.60415	7.28681	3.23224	4.55499	2.12015	1.27495	1.72112	1.1928	0	0	0	0	0	0	0.294174	0	0	0.817675	0	0.195093	0	0	0.35755	0.118896	0	0	0	0	0	0	0	0	0	0	5.17632	4.7021	5.56526	3.97331	3.51483
srna13698	GTAGTAGTTTGTGCTGTT	18	1	hsa-let-7i-5p:5-22(1)	5.84129	5.24155	12.373	0	13.9172	5.54225	5.25491	0.633636	4.76331	4.11701	2.47351	2.76238	2.96032	4.91152	3.9046	2.34525	0	0.334437	2.49421	0.683038	2.64757	3.66741	1.56826	7.56349	0	4.68223	3.52094	3.82138	5.45264	1.78344	7.37293	2.7765	3.238	2.66892	2.94919	0	4.06519	9.28245	3.18071	8.16525	1.66382	2.86215	2.31886	6.98754	5.69973
srna31573	GATGTAGTAGTTTGTGCTGTT	21	1	hsa-let-7i-5p:5-22(1)	0	0	0.135967	0	0	7.58078	8.37946	3.485	7.31508	7.18287	1.59011	0.637473	1.30805	1.61379	0.0758174	0	0	0	0.650663	0	0.294174	1.10022	0	1.02209	0	0.390186	0.541683	0	0.446938	0	0.291037	0	0	0.205302	0	0	0	0.386769	0	0	3.88224	3.47547	4.17395	7.67259	9.78454
srna10965	TGATGTAGTAGTTTGTGCTGTT	22	1	hsa-let-7i-5p:5-22(1)	1.25171	0.873592	0.135967	0	0.434913	24.3986	19.7414	9.18772	23.4763	24.0013	6.00709	2.97487	2.20303	4.5607	0.0758174	0.203935	0	0	2.06043	0.683038	1.76505	1.10022	0.784128	2.86186	0	1.56074	1.62505	0.694797	2.23469	0.118896	0.582074	0	0	0	0.346964	0	0	0.386769	0	0.816525	12.2013	14.5152	9.97109	27.1281	30.3986
srna44230	TAGTAGTTTGTGCTGTT	17	1	hsa-let-7i-5p:6-22(1)	3.33788	0.873592	3.94304	0	5.87133	1.40149	0.497086	0.316818	1.19083	1.57673	0.176679	0.424982	0.344223	1.12263	0.492813	0.203935	0	0	1.08444	0	0.588349	0	1.0455	1.83977	0	0.195093	0.541683	1.38959	3.03918	0.356687	4.36555	0.27765	0.3238	0.205302	0.693928	0	0	3.09415	1.06024	3.06197	2.40329	1.22664	0	1.91815	1.51993
srna22599	GAGTTAGTAGTTTGTGCTGTT	21	1	hsa-let-7i-5p:6-22(1)	5.84129	6.98874	7.20625	0	12.8299	4.33187	2.98252	1.58409	3.57248	2.36509	5.1237	2.3374	2.68494	4.13971	0.189544	0.101967	0	0	7.04885	2.04911	2.94174	3.66741	3.13651	0.408837	0	0	0	0.347398	0.0893876	0	0	0	0	0	0	0	2.03259	9.28245	3.39276	8.16525	2.03355	1.83995	1.15943	3.15124	5.60474
srna30120	AGTAGTTTGTGCTGTT	16	1	hsa-let-7i-5p:7-22(1)	7.51023	6.98874	8.97382	0	13.6998	1.33778	1.06519	0.633636	1.53106	0.87596	2.82687	3.18737	1.72112	2.10494	0.758174	0.40787	0	0	2.16888	0.683038	1.76505	0.733483	0.784128	2.04419	0	1.36565	0.541683	1.73699	2.32408	0.237792	0.582074	0.27765	0.3238	0.615905	0.173482	0	2.03259	9.28245	3.18071	7.34872	0.554605	1.22664	0	0.685053	2.1849
srna27019	GTAGTTTGTGCTGTT	15	1	hsa-let-7i-5p:8-22(1)	9.59641	7.86233	12.6449	0	11.5252	1.27408	1.34923	0.633636	1.70118	0.788364	3.71026	2.12491	1.37689	2.80658	0.947718	0.40787	0	0.668875	2.06043	0.683038	2.3534	0.733483	1.30688	2.86186	7.76672	0.780371	0.812525	3.12659	1.96653	0.475583	0.485062	0	0.3238	1.23181	0.173482	0.817798	0	9.66922	3.60481	7.75698	1.10921	1.0222	0.927544	2.05516	2.0899
srna34545	AACCCGTAGATCCGAACTT	19	1	hsa-miR-100-5p:1-19(1)	0	0.873592	0	0	0.434913	0.63704	0.639111	1.90091	5.10354	6.13172	2.12015	0.424982	0.89498	0.701646	0.189544	0.713772	63.7766	1.33775	9.75995	6.83038	1.76505	1.83371	0.261376	2.04419	0	0.975464	0.812525	0.694797	1.87714	1.07006	0.776098	1.6659	1.2952	2.25832	1.56134	0	0	1.93384	0	1.02066	4.62171	4.29322	8.57978	1.37011	3.70483
srna1432	AACCCGTAGATCCGAACTTG	20	1	hsa-miR-100-5p:1-20(1)	25.8686	5.24155	6.11851	66.5366	27.3995	20.1942	14.0604	86.8081	80.2957	69.2884	32.6857	20.1866	44.6802	22.3123	8.03665	27.1233	205.503	25.4172	129.374	118.849	43.5378	86.551	19.6032	129.193	3.88336	63.2101	53.3558	52.1098	71.957	80.8491	47.342	50.8099	64.76	71.6503	71.995	60.517	134.151	169.405	7.20961	34.294	86.1487	72.167	415.076	49.0498	51.3926
srna21820	AACCCGTAGATCCGAACTTGTGG	23	1	hsa-miR-100-5p:1-21(1)	0	0	4.21498	0	0.434913	0.63704	1.34923	1.58409	1.19083	0.963556	0.530038	1.06246	1.51458	1.89444	0.113726	1.83541	0	9.02981	7.04885	0	0.588349	1.10022	0	0	0	2.53621	0.270842	3.82138	3.21795	9.03608	0	1.1106	4.2094	6.36435	2.94919	0	4.06519	4.64123	1.48433	9.1859	4.25197	2.86215	6.02903	0.822064	0.569973
srna4001	AACCCGTAGATCCGAACTTGT	21	1	hsa-miR-100-5p:1-21(1)	1.25171	27.0814	8.15802	0	16.5267	5.47854	6.81718	28.1968	32.1523	31.1842	2.29683	17.4243	18.8634	8.41975	0.833992	7.34165	0	18.3941	28.087	103.139	6.17766	3.30067	0	32.9114	0	20.8749	26.2716	13.8959	35.3081	14.7431	25.6112	11.106	5.8284	1.64241	23.9405	27.8051	115.858	30.168	9.96623	18.9842	28.1	42.5234	61.6816	21.3737	37.1432
srna9849	AACCCGTAGATCCGAACTTGTGA	23	1	hsa-miR-100-5p:1-22(1)	0	0	1.76757	22.1789	7.39352	3.1215	2.27239	8.23727	5.78402	5.69374	1.59011	10.4121	8.53673	10.4545	0.492813	2.44722	0	14.0464	1.7351	6.14734	2.3534	2.56719	0	3.2707	0	2.34111	0	15.2855	13.7657	14.862	0	8.3295	8.095	3.49013	15.4399	20.4449	40.6519	18.1781	2.33252	0	19.0414	5.51986	20.1741	0.411032	1.80491
srna2347	AACCCGTAGATCCGAACTTGTG	22	1	hsa-miR-100-5p:1-22(1)	0	0	4.35094	7.39295	7.82844	8.34522	13.4923	33.5827	43.3801	21.9866	6.89049	12.962	28.7082	22.8737	4.05623	11.7263	0	48.8279	42.1847	101.773	24.7107	63.4463	5.75027	29.4363	0	13.6565	34.1261	22.2335	44.1575	43.7536	22.5069	19.7131	45.9796	56.2526	79.1078	26.9873	2.03259	56.0815	17.812	4.69502	71.9138	17.9907	99.9428	8.90569	22.229
srna33718	ACCCGTAGATCCGAACTTG	19	1	hsa-miR-100-5p:2-20(1)	1.66894	0	0.135967	14.7859	1.73965	0.764448	0.639111	3.80182	3.06213	2.36509	0.883396	1.27495	2.47841	0.701646	0.379087	1.52951	7.08629	1.33775	3.14487	5.4643	1.1767	2.93393	0	4.29279	0	2.53621	0.541683	3.12659	2.68163	2.61571	0.873111	1.94355	2.5904	1.64241	1.21437	4.90679	4.06519	6.1883	0.636142	1.42892	2.58816	3.27103	12.29	1.50712	1.13995
srna29498	TACAGTACTGTGATA	15	1	hsa-miR-101-3p:1-15(1)	0	0	2.99127	0	0.65237	0.191112	1.49126	1.26727	1.53106	0.87596	0.176679	0.637473	1.30805	0.280658	0.947718	1.83541	0	3.34437	0.759107	0.683038	1.47087	0.366741	13.3302	3.88396	0	2.53621	2.43758	1.0422	1.78775	4.63694	0.970123	0.5553	0.6476	0.615905	0.86741	0	0	0	0	0.408262	0.184868	0.613318	1.39132	0.548042	2.27989
srna46585	TACAGTACTGTGATAA	16	1	hsa-miR-101-3p:1-16(1)	0	0.873592	0.135967	0	0.869826	0.127408	0.497086	2.53454	1.36094	2.36509	0.883396	0	0.344223	0.91214	0.758174	0.713772	3.54315	2.34106	2.49421	0.683038	1.47087	2.93393	0.784128	1.22651	0	0.780371	0.541683	2.43179	1.4302	0.594479	2.81336	1.1106	0.9714	1.02651	0.693928	0	0	0	0	0	1.10921	0.408878	0.695658	1.37011	0.569973
srna4964	TACAGTACTGTGATAAC	17	1	hsa-miR-101-3p:1-17(1)	0	11.3567	3.67111	0	3.26185	6.62522	7.81136	7.60363	20.5843	10.3363	9.71736	9.5621	14.1131	10.244	10.9177	13.4597	3.54315	61.202	12.0373	17.759	10.0019	8.80179	16.7281	12.4695	0	13.8516	29.5218	26.0549	12.8718	6.06368	6.79086	31.3744	12.952	21.762	9.54151	0	0	0.773538	6.57347	0.816525	17.3776	12.0619	12.5218	6.85053	8.4546
srna27808	TACAGTACTGTGATAACTGAAGAA	24	1	hsa-miR-101-3p:1-18(1)	0	0	3.67111	0	0.434913	1.5926	1.20721	6.65318	0.680472	0.963556	0	0	1.92765	1.89444	0	0.611804	0	3.34437	2.7111	0	0.882523	0	4.96615	1.22651	0	3.90186	0	0.347398	5.27387	0	2.71634	6.1083	9.714	2.25832	0	0	0	0	5.72528	0	0	0	1.15943	2.46619	1.04495
srna20725	TACAGTACTGTGATAACTGCAGA	23	1	hsa-miR-101-3p:1-18(1)	1.25171	0.873592	1.08774	0	0.65237	0.127408	0.142025	0	0.170118	0.350384	2.82687	2.3374	1.65227	3.29774	1.93334	4.79247	0	1.33775	9.97684	1.36608	19.1213	10.2688	13.3302	0	0	0.195093	0	0	0	1.54565	2.42531	4.72005	2.5904	2.25832	2.60223	0	0	1.16031	0.424095	0.408262	0	0	0.231886	0.411032	0.284987
srna1453	TACAGTACTGTGATAACT	18	1	hsa-miR-101-3p:1-18(1)	5.00682	0.873592	16.316	0	9.13317	33.5083	44.3827	40.2359	65.6656	80.5883	59.0109	38.0359	56.7968	43.7125	40.0695	70.9693	7.08629	18.7285	49.5589	28.0045	79.1329	37.7744	33.1948	58.0549	0	54.2358	44.6889	75.0381	66.8619	36.9766	35.8946	52.1982	36.2656	42.4974	75.2912	0	0	5.41477	7.84576	2.24544	84.6697	47.4299	51.4787	42.6103	51.6776
srna4718	TACAGTACTGTGATAACTGCAG	22	1	hsa-miR-101-3p:1-18(1)	3.33788	0.873592	3.53514	0	3.91422	0.891856	1.06519	1.26727	2.04142	2.2775	12.0142	8.92462	9.43171	14.5241	14.1779	24.2682	28.3452	5.351	60.2948	20.4911	65.0126	44.009	39.9905	1.83977	0	2.34111	0.812525	1.0422	0.35755	8.08491	18.0443	14.9931	8.095	12.1128	9.71499	2.45339	0	2.70738	2.75662	1.22479	0.739474	1.83995	0.231886	1.91815	3.13485
srna645	TACAGTACTGTGATAACTGAAA	22	1	hsa-miR-101-3p:1-19(1)	36.7167	15.7247	36.5751	0	75.4574	50.9632	65.4024	43.4041	168.077	143.395	90.8131	99.0208	56.0395	111	48.2578	76.3736	283.452	59.8643	320.126	123.63	213.571	239.482	305.026	192.971	0	174.998	78.8149	107.346	127.109	77.0445	164.339	145.211	82.569	106.552	133.234	0	0	30.168	52.7998	6.32807	90.5855	54.7897	37.1017	136.326	173.177
srna3935	TACAGTACTGTGATAACTGG	20	1	hsa-miR-101-3p:1-19(1)	2.08618	0	1.2237	0	5.21896	3.63113	6.17807	4.75227	6.46449	7.79604	7.06717	11.687	6.05833	9.1214	14.7465	25.4918	14.1726	10.3676	38.3891	18.442	37.9485	22.738	41.036	24.3258	0	31.4099	20.0423	30.9185	18.0563	22.5902	16.3951	22.4896	18.1328	13.1393	19.777	0.817798	2.03259	1.54708	2.33252	1.02066	4.99145	7.97313	6.72469	10.4128	10.3545
srna42184	TACAGTACTGTGATAACTGC	20	1	hsa-miR-101-3p:1-19(1)	0.417235	0	0.407901	0	0.65237	0.573336	0.142025	0	0.340236	0.262788	0.706717	0.424982	1.65227	1.54362	2.95688	4.18066	0	2.00662	2.92798	0	2.64757	2.20045	2.09101	0.204419	0	0.390186	0	0	0.0893876	2.49681	0.776098	2.2212	1.2952	1.43711	0.86741	0	0	0.386769	0.212047	0	0	0	0	0	0.284987
srna23267	TACAGTACTGTGATAACTGT	20	1	hsa-miR-101-3p:1-19(1)	0	0	0	0	0	1.40149	2.48543	0.316818	0	2.62788	2.47351	0.424982	2.27187	2.3856	3.52551	2.03935	0	0.334437	0.325332	32.7858	0.588349	0	0.261376	3.88396	0	0.585278	0.541683	6.25317	6.97223	0.356687	3.20141	0	0	0.205302	5.03098	0	0	0	0	0	1.29408	2.45327	1.6232	1.50712	2.27989
srna566	GTACAGTACTGTGATAACTG	20	1	hsa-miR-101-3p:1-19(1)	16.2722	0.873592	45.8209	0	29.3566	71.03	119.159	38.9686	145.281	209.354	85.8661	99.2333	73.5949	94.9327	139.201	135.209	28.3452	48.159	317.524	183.054	275.347	224.446	295.355	258.59	7.76672	194.312	149.775	193.848	160.54	140.178	223.322	199.908	159.31	132.42	185.626	0.817798	2.03259	29.3944	30.9589	20.6172	119.425	81.5713	82.5514	175.1	195.976
srna700	TACAGTACTGTGATAACTG	19	1	hsa-miR-101-3p:1-19(1)	15.0205	0.873592	17.2678	0	16.3092	32.5527	52.4781	46.8891	70.7691	90.7495	75.0887	85.2089	64.7139	80.2683	107.509	152.849	21.2589	89.6292	344.635	167.344	318.297	203.175	307.901	134.303	3.88336	119.202	97.503	170.573	107.801	143.151	119.907	146.877	81.2738	112.095	149.195	0	0	55.6947	23.9614	23.0668	58.973	72.167	46.6091	68.9163	83.976
srna10444	TACAGTACTGTGATAACTGAAAA	23	1	hsa-miR-101-3p:1-19(1)	0.417235	0	3.39917	0	9.35063	1.91112	5.752	2.53454	0	5.60614	0	7.43719	6.3337	6.52531	3.94251	1.12164	0	3.34437	10.4106	0.683038	4.11844	37.7744	6.79578	11.8563	0	7.99881	0	3.47398	8.49182	3.68577	3.58946	3.60945	0	12.3181	4.51053	0	0	0	0	7.96112	2.9579	0.817757	2.78263	9.59074	0.664969
srna40872	TACAGTACTGTGATAACTGCC	21	1	hsa-miR-101-3p:1-19(1)	0	0	0.135967	0	0.869826	0.191112	0.0710123	3.80182	0.170118	0.087596	1.41343	2.76238	0.963825	0.982304	0.492813	0.509837	0	0.334437	2.81954	2.04911	16.1796	6.60135	8.10266	0	0	0.195093	0	0	1.60898	0.356687	2.13427	0.5553	1.619	0.821207	1.04089	0	0	0	0	0	0	1.22664	0	1.37011	0.949955
srna21882	TACAGTACTGTGATAACTGCAA	22	1	hsa-miR-101-3p:1-19(1)	0.417235	0	0.543868	0	0.869826	0.191112	0	0	0.680472	0.43798	4.06362	3.82484	1.92765	2.94691	1.40262	1.52951	7.08629	2.34106	11.2782	4.78126	9.70776	9.90202	12.0233	0.204419	0	0.195093	0.270842	0	0	1.07006	3.39543	3.8871	1.9428	1.84771	3.46964	0	0	0.386769	0.636142	0.204131	0.369737	0	0	0.137011	0.379982
srna11490	TACAGTACTGTGATAACTGCCT	22	1	hsa-miR-101-3p:1-19(1)	0	0	1.35967	0	1.30474	0.509632	0.852148	0	1.02071	1.75192	9.18732	9.5621	4.95681	6.24465	2.1608	4.0787	10.6294	2.34106	20.0621	7.51341	15.8854	22.0045	19.3418	0	0	0.585278	0	0.347398	0.446938	4.87473	14.1638	6.1083	4.857	3.69543	2.94919	0	0	0	1.06024	0.204131	0	0.408878	0.463772	2.6032	2.1849
srna16302	TACAGTACTGTGATAACTGCA	21	1	hsa-miR-101-3p:1-19(1)	0.83447	0	0.271934	0	1.5222	0.191112	0.142025	0	1.70118	0.788364	2.47351	1.48744	2.13418	2.59609	2.53988	4.18066	10.6294	2.34106	18.1101	5.4643	12.6495	11.0022	15.4212	0.408837	0	0	0	1.38959	0.0893876	3.92356	7.76098	5.83065	2.9142	2.66892	3.64312	0	2.03259	0	1.48433	0	0.184868	0	0.231886	0.274021	1.80491
srna43558	TACAGTACTGTGATAACTGAAGTA	24	1	hsa-miR-101-3p:1-20(1)	0	0	0	0	0	0.063704	0.284049	0	0	0.525576	0	3.61235	2.20303	1.12263	1.40262	0.815739	0	4.01325	0	0	9.70776	11.369	0	1.83977	0	1.75584	0	0	6.07836	0	0.388049	14.4378	0	0	0.520446	0	0	0	0	0	0	0	2.31886	0	1.70992
srna632	TACAGTACTGTGATAACTGAAGA	23	1	hsa-miR-101-3p:1-20(1)	63.0025	40.1852	59.1456	0	50.8848	38.7957	79.0367	47.8395	82.8475	69.0257	74.0286	68.8471	62.924	99.7039	61.2605	125.114	24.802	53.51	348.972	58.7412	419.787	288.625	451.396	196.855	0	263.18	105.087	186.9	159.378	85.7239	108.363	184.637	185.537	88.0744	179.033	13.9026	2.03259	18.5649	46.8625	22.8627	73.5776	62.9673	55.8845	70.0124	105.35
srna140	GTACAGTACTGTGATAACTGA	21	1	hsa-miR-101-3p:1-20(1)	204.862	47.174	163.84	0	139.172	309.92	394.118	293.69	508.823	606.778	434.278	497.442	371.899	442.318	769.964	895.274	609.421	399.318	1620.8	657.765	1855.95	1560.85	2198.17	1301.53	62.1338	1397.65	926.279	1004.68	773.918	718.249	900.856	1101.16	764.815	726.152	866.89	19.6271	63.0104	121.059	104.115	64.5054	342.191	520.911	400.931	582.843	749.325
srna285	TACAGTACTGTGATAACTGA	20	1	hsa-miR-101-3p:1-20(1)	53.4061	28.8285	74.3739	0	103.509	103.264	160.843	126.727	186.62	238.787	196.644	219.503	209.494	228.526	297.204	530.129	325.969	222.066	705.861	290.974	651.302	407.45	682.714	547.842	15.5334	709.748	486.703	612.811	391.071	486.165	340.416	479.501	334.162	330.741	419.653	0	52.8475	50.6667	55.9805	19.3925	163.978	238.581	159.306	219.765	284.702
srna12079	TACAGTACTGTGATAACTGACA	22	1	hsa-miR-101-3p:1-20(1)	0	0	0.679835	0	0	5.03262	5.60997	0	4.59319	2.1899	0.176679	0	0.481912	10.9457	0.530722	0.509837	0	0	4.01242	28.6876	7.64854	4.4009	5.4889	13.2872	0	9.75464	7.31273	2.77919	5.09509	10.5817	3.68647	11.3836	0	0.410603	1.9083	0	0	0	0	0	5.73092	0	3.47829	1.91815	5.12976
srna3359	TACAGTACTGTGATAACTGACC	22	1	hsa-miR-101-3p:1-20(1)	0	0	16.316	0	16.5267	8.28152	14.6996	1.90091	17.8624	18.3076	13.6043	18.6992	11.979	21.4002	2.31243	8.15739	38.9746	3.00994	42.9438	0.683038	14.1204	39.9748	95.4023	27.3921	0	30.2394	17.063	12.5063	23.4196	8.20381	62.0879	31.6521	33.3514	11.7022	25.5019	0.817798	0	2.32061	0.424095	0	10.9072	9.60864	13.4494	37.1299	56.3323
srna4033	TACAGTACTGTGATAACTGATT	22	1	hsa-miR-101-3p:1-20(1)	0	0	0	0	0	9.74671	6.95921	1.90091	21.0946	24.7897	8.30392	15.0869	0.0688446	6.10432	10.4628	15.0912	35.4315	6.35431	61.7046	8.87949	9.11941	11.0022	40.7747	9.40326	0	23.021	5.95852	14.9381	23.1514	11.1762	38.0288	29.9862	1.619	2.46362	17.5217	0	24.3911	0	0	0	4.43684	9.60864	4.17395	13.016	41.608
srna28738	TACATTACTGTGATAACTGA	20	1	hsa-miR-101-3p:1-20(1)	1.25171	0.873592	1.2237	0	1.95711	0.127408	0.355062	0	0.170118	0.613172	0.706717	1.06246	0.688446	0.77181	0	0	0	0	15.7244	8.87949	12.6495	5.50112	16.2053	0	0	0.195093	0.270842	0	0.0893876	0	0.0970123	0	0	0	0	0	2.03259	0.773538	1.06024	0.408262	0.554605	0.408878	0	0.274021	0.379982
srna15721	TACAGTACTGTGATAACTGATA	22	1	hsa-miR-101-3p:1-20(1)	0	0	0.271934	0	0.217457	1.21038	2.98252	0.633636	4.42307	2.45269	0	6.58722	1.78996	7.36728	0.947718	2.44722	0	0.668875	11.2782	0	20.5922	0.366741	7.84128	0.408837	0	7.60862	5.14599	0.347398	5.18448	5.707	0.873111	1.38825	9.714	0.410603	9.88848	0	0	0	0	0	0.369737	0.613318	2.08697	3.56228	3.03986
srna27764	TACAGTACTGTGATAACTGACG	22	1	hsa-miR-101-3p:1-20(1)	0.83447	0	1.35967	0	0.217457	0.891856	1.06519	0.950454	3.7426	2.62788	1.94347	1.91242	0.89498	2.1751	0.530722	1.42754	0	0.334437	2.27732	3.41519	2.05922	0.733483	2.61376	2.86186	0	2.53621	2.97926	1.73699	2.59224	2.02123	7.37293	1.1106	0.6476	0.615905	1.9083	0	0	0.386769	0	0	0.739474	0.408878	1.15943	3.69929	6.17471
srna39058	TACAGTACTGTGATAACTGAGA	22	1	hsa-miR-101-3p:1-20(1)	0	0	0	0	0	2.73927	0	0	0	0.525576	0	0	1.44574	0.841975	1.02354	2.14132	0	0	0	0	0	0	5.22752	2.24861	0	3.90186	0	5.55838	2.59224	0.83227	0.0970123	3.8871	0	0.205302	6.07187	0	0	0	0	4.89915	3.32763	5.31542	0.695658	1.64413	2.0899
srna341	TACAGTACTGTGATAACTGACT	22	1	hsa-miR-101-3p:1-20(1)	12.5171	28.8285	36.3032	0	63.9322	100.334	186.549	100.114	474.97	562.892	254.595	244.577	122.819	235.613	82.0724	152.543	173.614	82.606	514.783	213.791	321.239	438.989	445.646	334.838	0	363.263	330.156	288.341	289.795	240.051	701.884	268.487	243.498	129.751	243.916	17.9916	0	6.1883	38.1685	2.04131	153.256	234.287	124.291	600.38	857.145
srna1958	TACAGTACTGTGATAACTGAT	21	1	hsa-miR-101-3p:1-20(1)	8.3447	0	3.67111	0	5.65387	11.0208	17.256	6.33636	52.3964	55.0979	22.6149	23.5865	6.05833	27.5747	20.357	39.1555	14.1726	25.7517	84.6947	26.6385	89.1349	56.8449	84.9472	58.0549	0	43.5057	30.0634	34.045	31.1963	24.0169	78.2889	42.7581	22.3422	31.0005	26.5427	0	0	3.09415	4.24095	0	16.2684	21.6706	11.5943	38.363	80.7462
srna1710	TACAGTACTGTGATAACTGAC	21	1	hsa-miR-101-3p:1-20(1)	0	0.873592	10.6054	0	8.48081	13.8875	27.3398	21.5436	51.0354	53.2584	22.0849	58.2225	20.1715	29.6095	10.0837	19.0679	3.54315	14.0464	72.549	79.2324	42.067	67.1137	80.7652	63.1654	0	70.2334	48.2098	47.2462	38.5261	34.0042	99.2436	52.4758	36.2656	12.5234	47.3606	0.817798	0	0.773538	6.99757	0.204131	22.7388	28.8259	15.3045	74.5338	93.9506
srna1734	TACAGTACTGTGATAACTGAAGT	23	1	hsa-miR-101-3p:1-21(1)	17.9411	0	6.25448	0	27.3995	19.9394	22.5109	8.55408	79.1049	57.901	40.1062	18.2742	21.7549	33.7492	24.2995	37.8299	3.54315	25.4172	98.0333	45.0805	79.7213	57.5784	67.9578	74.6128	0	69.0629	24.9174	40.993	47.5542	28.8917	79.162	30.8191	43.3892	12.7287	36.9517	0	2.03259	6.96184	7.63371	0	14.6046	33.9369	13.9132	59.1886	104.495
srna3366	TACAGTACTGTGATAACTGAAT	22	1	hsa-miR-101-3p:1-21(1)	22.9479	0	2.31144	0	3.69676	15.1616	11.0069	1.90091	44.7411	43.2724	12.3675	4.6748	6.95331	10.0335	7.3922	15.703	0	13.3775	59.7526	4.09823	21.7689	22.738	45.7408	17.58	0	14.4369	11.6462	14.9381	12.8718	11.8896	73.9234	12.7719	20.0756	13.1393	6.7658	0	0	0.386769	0.212047	0	21.8145	22.0794	6.26092	56.4484	68.6818
srna160	TACAGTACTGTGATAACTGAAG	22	1	hsa-miR-101-3p:1-21(1)	206.531	109.199	196.472	0	294.219	303.231	418.618	358.004	847.018	919.232	354.772	343.81	297.546	451.018	469.234	821.551	726.345	263.202	1662.77	582.631	1532.94	1029.81	1069.81	1171.93	7.76672	1291.9	665.187	1066.51	672.374	539.073	1160.95	731.052	596.439	636.846	527.732	63.7882	52.8475	205.761	150.978	70.4253	382.308	480.841	435.018	923.863	1367.94
srna45762	TACATTACTGTGATAACTGAA	21	1	hsa-miR-101-3p:1-21(1)	1.25171	0	0.543868	0	1.5222	0.191112	0.355062	0.316818	0.510354	0.43798	0.176679	0.212491	0.275378	0.491152	0	0	0	0	10.3022	6.14734	4.70679	4.4009	6.01165	0.204419	0	0	0	0	0	0	0	0	0	0	0	0	0	1.16031	0.636142	0	0.184868	0	0.231886	0.411032	0.474978
srna759	GTACAGTACTGTGATAACTGAA	22	1	hsa-miR-101-3p:1-21(1)	20.4445	0.873592	23.9302	0	38.7073	37.5854	56.1708	38.9686	132.522	134.197	33.3924	56.5226	31.6685	51.9218	64.786	53.329	109.838	46.4868	230.009	157.099	283.878	180.07	254.842	185.612	7.76672	143.783	117.004	111.168	124.874	46.0127	297.634	118.557	62.4934	91.1539	64.0149	0	48.7823	26.3003	7.42166	10.0024	35.6796	26.5771	32.0003	143.45	194.456
srna499	TACAGTACTGTGATAACTGAA	21	1	hsa-miR-101-3p:1-21(1)	48.3993	15.7247	36.5751	0	67.8464	47.5869	91.961	69.0663	202.1	221.268	66.7847	69.2721	60.6521	98.3006	104.059	127.051	201.959	79.2617	434.643	252.041	308.883	249.384	387.359	290.07	11.6501	278.788	181.464	303.626	190.843	148.501	486.614	198.52	145.71	129.751	173.482	2.45339	4.06519	24.3664	44.3179	2.24544	78.3842	81.7757	70.0295	280.735	346.069
srna41898	ACAGTACTGTGATAAC	16	1	hsa-miR-101-3p:2-17(1)	0	2.62078	0.271934	0	0.217457	0.828152	0.92316	0.950454	1.70118	1.31394	0.883396	2.54989	1.10151	1.26296	0.947718	1.22361	0	3.00994	2.27732	1.36608	1.1767	1.46697	1.82963	1.22651	0	1.17056	1.08337	1.0422	0.804488	0.83227	0.776098	0.83295	0.9714	0.615905	2.60223	0	0	0	0.212047	0	1.47895	0.408878	2.55074	1.2331	1.13995
srna8021	ACAGTACTGTGATAACT	17	1	hsa-miR-101-3p:2-18(1)	0	0	1.08774	0	1.73965	6.81633	10.2968	10.455	17.0118	22.337	8.65728	7.0122	7.91713	7.78827	5.38304	5.81214	0	1.33775	9.00084	4.78126	8.53106	4.4009	8.36403	6.95024	0	11.1203	8.39609	6.94797	7.15101	4.16135	6.69385	6.94125	3.8856	4.51664	8.32714	0	0	0	1.27228	2.04131	11.277	7.35981	11.8262	10.9608	13.1094
srna15485	ACAGTACTGTGATAACTGAAA	21	1	hsa-miR-101-3p:2-19(1)	2.08618	0	2.85531	0	2.82694	1.08297	1.84632	0.950454	3.91272	3.85422	1.94347	3.18737	2.13418	4.42037	0.796083	2.03935	3.54315	1.33775	9.43462	3.41519	6.47184	6.2346	10.455	6.33698	0	4.09695	1.89589	2.08439	2.94979	1.54565	4.85062	3.05415	2.9142	1.64241	2.42875	0	0	0.773538	3.39276	0.612393	3.5125	1.63551	1.6232	4.38434	5.60474
srna7066	ACAGTACTGTGATAACTG	18	1	hsa-miR-101-3p:2-19(1)	0.83447	0	1.08774	0	1.30474	3.75854	6.10706	3.16818	7.82543	11.0371	5.1237	5.94975	4.61259	6.66564	6.17912	8.05542	0	6.35431	25.2674	11.6116	21.4747	18.3371	21.9556	8.99442	0	8.97427	8.93778	9.72716	9.02815	6.77706	8.82812	11.3836	7.1236	7.39086	10.4089	0	0	4.25446	1.48433	1.63305	7.94934	4.49766	6.72469	10.0018	10.7345
srna10693	ACAGTACTGTGATAACTGACT	21	1	hsa-miR-101-3p:2-20(1)	2.08618	2.62078	1.6316	0	3.69676	2.73927	3.55062	2.53454	9.52661	11.9131	4.59366	7.43719	3.09801	5.68333	1.70589	3.26296	0	2.34106	15.399	6.14734	18.8272	15.0364	10.455	8.17675	0	6.82825	3.79178	4.51618	4.02244	3.80466	9.70123	2.7765	4.2094	2.87422	5.37794	1.6356	0	1.16031	1.27228	0	4.06711	3.06659	1.39132	14.2491	18.6191
srna23090	ACAGTACTGTGATAACTGAAGA	22	1	hsa-miR-101-3p:2-20(1)	0.83447	3.49437	2.58337	0	1.95711	0.700744	1.20721	0.633636	1.8713	1.13875	2.29683	1.27495	1.58343	2.10494	0.644448	1.22361	0	0.668875	9.21773	2.04911	8.23689	5.86786	10.1937	3.47512	0	3.31658	1.08337	1.73699	2.50285	0.594479	1.26116	2.49885	1.619	0	3.12268	0	0	0.386769	2.33252	0.408262	1.29408	2.45327	0.231886	1.37011	1.51993
srna36285	ACAGTACTGTGATAACTGAC	20	1	hsa-miR-101-3p:2-20(1)	0	0	0.543868	0	0.869826	0.95556	0.781136	0.316818	3.06213	2.54028	0.353358	1.69993	0.619602	1.1928	0.113726	0.509837	0	0.668875	2.38577	3.41519	2.05922	4.03416	2.61376	2.45302	0	2.14602	1.89589	1.0422	1.07265	1.54565	3.49244	0.83295	1.9428	0.821207	1.56134	0.817798	0	0	0.636142	0.408262	0.924342	0.204439	0.695658	4.24733	3.98981
srna2791	ACAGTACTGTGATAACTGA	19	1	hsa-miR-101-3p:2-20(1)	4.58959	0	7.07028	0	4.56659	11.1482	13.9894	11.0886	20.4142	23.3881	15.5478	18.0617	14.9393	14.8047	14.8981	22.025	14.1726	13.0431	55.0895	25.9554	52.3631	48.0431	58.2869	40.2705	7.76672	39.2137	26.2716	27.0971	23.9559	16.8832	21.9248	23.8779	23.6374	21.1461	23.0731	0	2.03259	3.09415	4.87709	0.612393	14.6046	18.3995	14.145	24.3879	24.6038
srna45085	ACAGTACTGTGATAACTGAT	20	1	hsa-miR-101-3p:2-20(1)	0.83447	0	0.135967	0	0.434913	0.509632	0.781136	0	1.8713	2.45269	0.353358	0.637473	0.206534	0.91214	0.682357	1.12164	0	0.334437	3.36176	0.683038	2.94174	1.46697	3.13651	2.45302	0	0.975464	1.62505	1.38959	1.16204	0.713375	3.39543	0.5553	0.3238	0.205302	0.520446	0	0	0	0	0	0.554605	0.817757	0.231886	1.78114	3.32484
srna8747	ACAGTACTGTGATAACTGAA	20	1	hsa-miR-101-3p:2-21(1)	2.50341	0	1.35967	0	4.56659	2.99409	4.0477	2.85136	8.84614	10.6867	3.88694	1.91242	3.02916	4.91152	2.80524	3.46689	7.08629	3.00994	23.9661	13.6608	19.1213	10.2688	22.217	11.243	0	9.55955	6.77104	7.29537	6.25713	3.56687	13.7757	5.553	9.714	4.31133	3.8166	0	2.03259	2.32061	2.75662	0.408262	3.88224	2.86215	3.94206	11.2349	14.6293
srna3968	ACAGTACTGTGATAACTGAAG	21	1	hsa-miR-101-3p:2-21(1)	10.8481	6.11514	9.51769	0	15.4394	8.40893	10.0127	9.18772	19.3935	22.8626	10.0707	12.537	7.84829	11.507	8.56737	15.703	17.7157	5.351	59.861	19.8081	45.8912	28.2391	23.2625	23.917	3.88336	24.5817	11.917	23.6231	11.4416	12.603	19.1114	10.273	10.0378	10.881	9.02107	5.72459	0	6.57507	6.36142	2.24544	9.05855	12.0619	9.97109	22.8808	29.0686
srna28979	CAGTACTGTGATAAC	15	1	hsa-miR-101-3p:3-17(1)	0	0.873592	0	0	0.869826	1.08297	3.12454	1.90091	2.21154	2.80307	1.59011	1.27495	3.8553	1.1928	1.13726	2.65115	0	11.7053	5.31375	2.04911	1.1767	2.56719	1.30688	1.02209	0	1.75584	1.62505	0.347398	2.05591	1.18896	0.873111	1.38825	0.6476	1.23181	1.38786	0	0	0	0.636142	0	2.9579	2.45327	3.01452	2.05516	2.27989
srna7184	CAGTACTGTGATAACT	16	1	hsa-miR-101-3p:3-18(1)	0.83447	0	2.44741	0	1.30474	6.49781	10.8649	7.60363	18.2026	25.2276	5.83041	9.98708	11.2217	8.06893	5.2314	5.71017	0	3.00994	10.0853	0.683038	7.64854	4.76764	13.0688	8.38117	0	13.8516	8.66694	11.4641	10.369	3.32908	6.69385	10.5507	4.5332	7.59616	12.1437	0	0	5.028	3.81685	2.24544	13.8651	9.81308	11.3624	11.6459	13.9643
srna26949	CAGTACTGTGATAACTGAAA	20	1	hsa-miR-101-3p:3-19(1)	0.417235	0.873592	0.815802	0	2.82694	0.95556	0.781136	0.950454	2.04142	2.1899	1.06008	0.849964	0.963825	1.61379	0.568631	0.611804	10.6294	1.67219	5.85597	0	13.8262	2.93393	6.5344	3.2707	0	4.09695	0.541683	1.38959	1.60898	0.951166	2.23128	1.94355	0.9714	1.64241	2.25527	0	0	0.386769	0.636142	0	0.924342	0.613318	0.927544	1.91815	4.1798
srna6692	CAGTACTGTGATAACTG	17	1	hsa-miR-101-3p:3-19(1)	1.66894	0	3.26321	0	2.82694	3.75854	6.03605	2.53454	8.50591	12.0882	5.47706	7.2247	3.99299	6.03415	6.74775	8.36133	0	5.351	21.4719	12.9777	20.0039	20.1708	21.1715	12.2651	0	12.4859	10.8337	9.72716	7.68733	8.67939	11.3504	13.0495	9.714	5.33784	7.45973	0.817798	0	2.70738	2.96866	2.44957	6.65526	6.54206	7.18846	10.4128	12.5394
srna2846	CAGTACTGTGATAACTGA	18	1	hsa-miR-101-3p:3-20(1)	12.5171	4.36796	10.4695	0	10.2205	10.7023	12.6402	10.7718	15.9911	20.3223	13.4276	13.3869	13.4935	15.0854	16.187	19.3738	17.7157	9.36425	51.294	21.8572	45.0087	42.9087	56.4572	37.613	0	38.4333	27.8967	28.1393	21.2743	20.569	20.8576	27.4873	19.1042	16.4241	22.7261	2.45339	6.09778	9.28245	5.51323	4.49089	13.1257	21.0572	13.9132	20.2776	28.4987
srna30972	CAGTACTGTGATAACTGAAGA	21	1	hsa-miR-101-3p:3-20(1)	0.83447	1.74718	1.6316	0	0.869826	1.21038	1.27822	0.633636	0.510354	1.05115	0.176679	0	1.03267	2.59609	0.416996	1.83541	0	0.668875	8.67551	0.683038	3.23592	2.20045	3.92064	0.613256	0	2.34111	5.41683	1.38959	1.34081	0.594479	0.582074	0.83295	1.9428	0.821207	1.38786	0	0	0.773538	1.27228	0.408262	0.554605	0.408878	3.71017	0.274021	0.949955
srna8537	CAGTACTGTGATAACTGAAG	20	1	hsa-miR-101-3p:3-21(1)	5.84129	4.36796	6.39045	0	8.69826	1.91112	5.60997	5.3859	11.3979	10.6867	2.29683	2.54989	2.40956	3.08724	5.45885	8.7692	7.08629	2.00662	19.0861	2.04911	21.4747	17.2368	14.6371	6.95024	0	10.3399	4.06263	7.99016	5.54203	4.63694	8.24605	4.16475	2.5904	4.10603	3.8166	0	2.03259	7.34861	4.66504	3.2661	7.025	4.90654	3.2464	11.7829	12.7294
srna11736	CAGTACTGTGATAACTGAA	19	1	hsa-miR-101-3p:3-21(1)	2.92065	0	3.12724	0	4.34913	1.78371	2.55644	1.26727	6.46449	7.70845	2.47351	2.54989	2.20303	1.75411	2.84315	2.54918	3.54315	1.00331	13.6639	6.83038	17.6505	10.2688	13.8529	8.99442	0	7.80371	4.06263	3.47398	5.63142	1.78344	11.8355	3.60945	3.238	3.07952	3.46964	0.817798	0	1.54708	2.96866	0.204131	2.58816	2.24883	1.85509	7.67259	9.78454
srna22778	AGTACTGTGATAACT	15	1	hsa-miR-101-3p:4-18(1)	0	0	1.2237	0	1.08728	1.5926	2.34341	1.58409	4.42307	4.2922	4.41698	8.28715	3.37339	3.43806	1.85753	1.73345	0	1.33775	3.57865	1.36608	2.3534	2.93393	2.61376	3.06628	0	3.31658	2.70842	3.12659	3.48612	1.07006	1.26116	1.94355	1.9428	1.23181	1.9083	0	0	3.48092	1.90843	2.04131	2.40329	1.22664	3.01452	2.19217	2.75487
srna18943	AGTACTGTGATAACTG	16	1	hsa-miR-101-3p:4-19(1)	1.25171	0	1.76757	0	1.08728	1.40149	1.49126	0.316818	1.8713	2.97826	1.94347	2.12491	2.20303	2.73642	2.08498	2.95705	0	3.34437	8.8924	5.4643	7.94271	6.60135	10.1937	3.47512	0	3.51167	2.97926	4.16878	3.12857	1.78344	2.81336	3.60945	0.9714	2.25832	3.12268	0	0	2.70738	1.90843	2.04131	1.10921	2.24883	1.6232	2.6032	2.75487
srna9213	AGTACTGTGATAACTGA	17	1	hsa-miR-101-3p:4-20(1)	7.92747	2.62078	8.15802	0	6.08878	1.97482	3.12454	1.90091	3.7426	5.78134	5.1237	5.94975	5.50757	4.3502	4.28368	5.71017	3.54315	4.01325	17.6764	5.4643	14.1204	13.2027	15.9439	11.6519	0	12.0958	9.47946	6.94797	6.34652	5.23141	4.07452	6.38595	4.5332	4.10603	4.33705	0.817798	2.03259	6.96184	3.81685	1.83718	2.21842	3.88435	2.31886	4.24733	4.65478
srna23645	AGTACTGTGATAACTGAA	18	1	hsa-miR-101-3p:4-21(1)	1.25171	0.873592	1.49564	0	2.60948	1.01926	1.06519	0.950454	2.04142	1.75192	1.59011	0.849964	0.826135	0.841975	1.3268	1.52951	3.54315	0.668875	6.1813	5.4643	2.94174	4.03416	6.79578	2.24861	0	2.53621	1.08337	6.60057	6.07836	1.66454	4.36555	2.7765	1.9428	1.02651	0.86741	0	0	3.09415	3.18071	0.408262	2.40329	0.204439	1.39132	2.05516	4.2748
srna30492	GTACTGTGATAACTG	15	1	hsa-miR-101-3p:5-19(1)	2.50341	0	2.0395	0	2.39202	0.63704	0.710123	1.26727	2.04142	1.83952	1.23675	1.06246	1.51458	1.68395	0.682357	1.32558	0	1.00331	4.12087	4.78126	5.88349	6.60135	3.39789	1.43093	0	3.12149	1.62505	1.73699	2.23469	0.83227	1.06714	1.1106	0.9714	0.615905	0.86741	0	0	2.32061	2.33252	1.63305	0.924342	1.0222	0.695658	1.78114	2.27989
srna15027	GTACTGTGATAACTGA	16	1	hsa-miR-101-3p:5-20(1)	8.76194	2.62078	6.11851	0	7.17607	1.14667	1.34923	1.26727	3.23224	2.45269	3.71026	4.6748	3.02916	3.71872	1.89544	1.52951	0	1.00331	10.5191	3.41519	5.58932	9.90202	11.2392	8.99442	0	6.82825	2.97926	2.77919	3.39673	1.54565	3.58946	1.38825	1.2952	1.02651	2.77571	0.817798	4.06519	1.54708	6.36142	3.06197	1.10921	2.65771	3.2464	2.6032	2.84987
srna45231	GTACTGTGATAACTGAA	17	1	hsa-miR-101-3p:5-21(1)	1.25171	0.873592	1.76757	0	2.82694	0.382224	0.284049	0	0.850591	1.22634	0.706717	0.849964	0.344223	0.982304	0.568631	0.203935	0	0	3.36176	2.04911	1.76505	2.93393	3.13651	0.408837	0	1.75584	0.541683	1.38959	1.07265	0.118896	1.74622	0.83295	0.9714	0	0.346964	0	2.03259	0.773538	1.27228	0.408262	0.554605	0.613318	0	0.685053	1.23494
srna39448	TACTGTGATAACTGA	15	1	hsa-miR-101-3p:6-20(1)	2.92065	0	2.85531	0	1.73965	0.382224	0.568099	0	0.170118	0.700768	0.883396	1.27495	1.03267	0.77181	0.265361	0.509837	0	0.334437	5.09686	4.78126	3.53009	1.83371	3.39789	3.06628	0	1.17056	0.812525	0.694797	0.804488	0.237792	0.0970123	5.553	0.3238	0	0.520446	0	4.06519	1.54708	1.69638	1.22479	0	2.45327	0	0.411032	0.759964
srna43721	TCAGTTATCACAGTGCTGAT	20	1	hsa-miR-101-5p:1-19(1)	0	0	0.135967	0	0	0.891856	0.0710123	0	0.170118	1.48913	0	0	0.0688446	0.631481	1.44053	1.12164	0	0.334437	0.216888	0	24.1223	0.733483	0	0.204419	0	1.56074	0	0.694797	0.178775	0.356687	0.291037	0	0.3238	0	0	0	0	0	0	0	0.369737	3.27103	0.695658	0	1.61492
srna41678	CAGTTATCACAGTGCTGATG	20	1	hsa-miR-101-5p:1-20(1)	0	0	0	0	0	0.63704	0.852148	1.90091	0.510354	1.75192	0.353358	0.424982	0.0688446	0.561317	1.09935	0.611804	0	0	0.759107	0	0.882523	12.4692	0.522752	0.613256	0	0.195093	0.270842	1.73699	0.804488	4.04246	2.91037	9.9954	0	0	4.16357	0	0	0	0	0	0.554605	1.0222	0.927544	0.274021	0.664969
srna8484	TCAGTTATCACAGTGCTGATG	21	1	hsa-miR-101-5p:1-20(1)	0	0	1.2237	0	3.69676	3.75854	6.53314	0	2.38165	9.72316	2.47351	10.837	2.47841	6.59547	6.25494	3.77279	0	0	5.42219	1.36608	25.299	20.1708	13.0688	4.08837	0	9.16936	13.8129	25.0127	7.50856	23.3036	14.9399	10.5507	9.0664	1.84771	6.24535	0	0	0	0	0	4.80658	6.95093	8.57978	3.42527	9.02457
srna11897	CAGTTATCACAGTGCTGATGC	21	1	hsa-miR-101-5p:1-21(1)	0	0	4.35094	0	0	2.67557	2.69847	2.21773	3.91272	1.13875	1.06008	8.71213	2.54725	2.31543	5.72422	3.77279	0	2.34106	15.2906	2.04911	0	5.50112	0.261376	4.90605	0	2.7313	0	11.4641	5.98897	9.74945	6.59684	8.8848	3.5618	1.23181	15.7869	0	0	0	0	0	2.21842	4.7021	0.695658	0.411032	1.61492
srna17570	TCAGTTATCACAGTGCTGATGC	22	1	hsa-miR-101-5p:1-21(1)	0	0	4.35094	0	0	6.4341	2.20138	0	3.7426	1.57673	0	7.43719	1.65227	0.0701646	2.38825	2.85509	0	0	9.75995	43.0314	0	15.4031	2.35238	0.817675	0	4.68223	0	0	3.03918	0	0	0.83295	0	0.205302	4.8575	0	0	2.32061	0	0	6.10066	4.49766	0.695658	4.24733	4.2748
srna33211	TCAGTTATCACAGTGCTGATGCT	23	1	hsa-miR-101-5p:1-22(1)	0	0	0	0	0	1.6563	0.92316	0	0.850591	0.43798	0	0.637473	1.58343	3.22757	0.530722	0	0	0	0.108444	0	0	8.06831	6.01165	7.76791	0	0	0	0	5.00571	2.49681	1.5522	0	0.6476	0	0.520446	0	0	0	0	0	2.03355	0	1.39132	0.685053	1.61492
srna7943	AGCAGCATTGTACAGGGCTCTG	22	2	hsa-miR-103a-3p:1-19(1);hsa-miR-103b:5-23(-1)	1.25171	0	3.26321	0	4.13167	0.828152	1.56227	0.316818	1.36094	0.788364	9.18732	6.16224	5.64526	8.41975	28.242	9.89084	3.54315	3.67881	21.9057	6.14734	17.9446	17.6036	20.126	1.63535	0	0.975464	0.541683	0.347398	0.35755	2.97239	10.8654	3.8871	9.714	7.18556	5.55142	0	0	1.93384	1.48433	0.816525	0.554605	0.613318	0.463772	0.959074	1.61492
srna19869	AGCAGCATTGTACAGGGCTCTGAT	24	3	hsa-miR-103a-3p:1-19(1);hsa-miR-103b:5-23(-1);hsa-miR-107:1-19(1)	3.33788	0	2.31144	0	0.869826	0.700744	0.639111	0.633636	0	0.175192	1.41343	1.06246	2.68494	2.59609	11.0693	2.85509	3.54315	1.33775	5.85597	0.683038	6.17766	4.03416	3.92064	0	0	0	0.541683	0	0.268163	1.78344	1.74622	2.49885	6.476	2.87422	3.29616	0.817798	0	0.386769	0.424095	0.204131	0.184868	0	0.463772	0.137011	0
srna27317	AGCAGCATTGTACAGGGCTCT	21	3	hsa-miR-103a-3p:1-19(1);hsa-miR-107:1-19(1);hsa-miR-103b:5-23(-1)	0.417235	0	0.271934	0	0	0.445928	0.355062	0.316818	0.510354	0.700768	2.82687	3.18737	1.03267	1.47346	2.88106	1.73345	0	1.67219	6.94041	1.36608	8.23689	6.96809	4.18202	0	0	0.390186	0	0	0.0893876	2.61571	6.88787	1.38825	2.9142	2.05302	1.38786	0	0	0	0.636142	0.408262	0.184868	0	0	0.685053	0.949955
srna26957	AGCAGCATTGTACAGGGCTATGAGA	25	2	hsa-miR-103a-3p:1-21(1);hsa-miR-103b:1-23(-1)	0	0	0	0	1.08728	2.29334	1.56227	5.3859	0	3.76663	0	0	3.2357	1.40329	1.02354	1.12164	0	0	4.98842	0	4.11844	0	3.92064	1.83977	0	0	0	0	0	0.237792	2.61933	0	0	4.10603	13.1846	0	0	0	1.27228	0	0	0	0.927544	0	1.23494
srna657	AGCAGCATTGTACAGGGCTAT	21	3	hsa-miR-103a-3p:1-21(1);hsa-miR-107:1-21(1);hsa-miR-103b:3-23(-1)	15.4377	20.0926	43.2375	7.39295	23.0504	108.106	83.2265	93.4613	198.528	294.41	95.4068	59.285	41.0314	52.9041	102.278	85.5506	106.294	32.4404	194.331	59.4243	216.512	154.765	115.267	211.369	3.88336	239.964	116.191	157.371	111.109	124.722	387.855	56.0853	136.967	74.1139	75.6382	1.6356	0	18.5649	22.265	15.1057	74.502	91.3843	88.5804	255.936	328.685
srna3728	AGCAGCATTGTACAGGGCTATGTA	24	2	hsa-miR-103a-3p:1-22(1);hsa-miR-103b:2-23(-1)	17.5239	0	9.10979	0	15.0045	20.5764	18.6762	14.8904	7.99555	3.85422	11.3075	27.6238	14.5951	11.0158	28.6969	14.4794	0	2.00662	19.1946	12.2947	10.5903	7.33483	13.8529	11.0386	0	30.4345	15.7088	4.86358	16.5367	9.63056	6.3058	38.038	25.904	16.8347	19.6035	0	0	5.41477	0.212047	6.12393	5.36118	7.76869	5.56526	7.67259	3.03986
srna25057	AGCAGCATTGTACAGGGCTATGCT	24	2	hsa-miR-103a-3p:1-22(1);hsa-miR-103b:2-23(-1)	0	0	0	0	0	0.63704	1.84632	5.06909	0.340236	0	0	0.424982	0.0688446	1.47346	26.0054	7.03575	17.7157	2.6755	0	0	0	0	0	0	0	0	0	0	0.0893876	0	0	0	0	5.33784	0	0	0	0	0	0	0.554605	0	0	0	0
srna414	AGCAGCATTGTACAGGGCTATGT	23	2	hsa-miR-103a-3p:1-22(1);hsa-miR-103b:2-23(-1)	214.876	62.025	122.098	0	126.342	275.01	185.484	102.015	189.171	212.333	118.552	122.607	121.304	138.435	247.089	83.9192	109.838	48.159	180.342	53.2769	146.499	155.498	155.519	231.811	3.88336	310.783	182.547	214.692	301.773	145.766	341.677	236.558	273.287	232.196	230.037	51.5213	2.03259	106.361	35.1999	56.9526	100.384	111.215	96.9283	152.904	209.56
srna5887	AGCAGCATTGTACAGGGCTATGC	23	2	hsa-miR-103a-3p:1-22(1);hsa-miR-103b:2-23(-1)	14.6032	0	15.6362	0	9.78554	13.2504	15.6937	13.3064	5.44378	3.94182	2.65019	0.424982	7.43522	3.43806	54.2095	13.1538	3.54315	18.7285	2.81954	0	0.294174	11.0022	8.88679	4.49721	0	2.34111	15.9797	2.08439	15.4641	0.118896	5.5297	0.5553	12.3044	7.59616	11.6233	0	0	5.028	1.90843	0	12.0164	7.76869	7.18846	4.52135	2.46988
srna33298	AGCATCATTGTACAGGGCTATG	22	2	hsa-miR-103a-3p:1-22(1);hsa-miR-103b:2-23(-1)	1.66894	0.873592	4.35094	0	3.26185	0.445928	0.426074	0.316818	0.340236	0.175192	0.706717	0.212491	0.826135	0.561317	0.0758174	0	0	0	10.0853	3.41519	9.70776	9.16853	8.62541	0	0	0.195093	0	0	0	0	0	0	0	0	0	0.817798	2.03259	2.70738	2.33252	1.22479	0	0.408878	0.231886	0.822064	0.664969
srna15974	AGCAGCATTGTACAGGGCTATGACT	25	2	hsa-miR-103a-3p:1-23(1);hsa-miR-103b:1-23(-1)	0	0	0	0	0	6.17929	10.2968	8.23727	3.40236	0	0	9.98708	2.47841	0.491152	4.81441	5.71017	0	0	6.72352	0	0	3.66741	0	0	0	0	0.541683	9.72716	5.72081	2.25902	1.84323	6.6636	0	0.615905	0.520446	0	0	0.386769	0	0	7.20987	4.49766	5.56526	0.822064	0
srna71	AGCAGCATTGTACAGGGCTATGA	23	2	hsa-miR-103a-3p:1-23(1);hsa-miR-103b:1-23(-1)	2247.65	889.317	1220.58	36.9648	549.948	2805.21	2150.96	1553.99	1033.64	982.477	1478.63	1107.5	1290.35	1404.91	2238.28	963.898	793.665	311.696	1685.98	506.814	2181.01	2235.66	1713.58	1677.66	50.4837	1568.55	1418.13	1604.29	2226.02	923.701	1225.07	2096.81	2683.33	2279.05	2075.02	335.297	367.9	571.644	818.079	682.615	1562.14	1013.2	1336.59	939.756	1132.35
srna33910	AGCAGCATTGTACAGGACTATGA	23	2	hsa-miR-103a-3p:1-23(1);hsa-miR-103b:1-23(-1)	2.08618	1.74718	2.0395	0	0.434913	2.48446	1.91733	1.90091	1.8713	1.48913	2.29683	0.637473	0.89498	0.420988	1.21308	0.713772	0	0.334437	0.867551	0	2.05922	2.56719	0.522752	1.43093	0	1.95093	1.35421	1.0422	2.1453	0.83227	1.26116	2.49885	2.5904	1.43711	1.73482	0	0	0	0.212047	0.612393	1.84868	2.04439	2.55074	0.822064	1.13995
srna40262	AGCAGCATTGAACAGGGCTATGA	23	2	hsa-miR-103a-3p:1-23(1);hsa-miR-103b:1-23(-1)	0.417235	0	0.951769	0	0.217457	4.45928	2.91151	3.485	2.21154	1.31394	1.06008	1.27495	0.757291	1.26296	0.947718	0.101967	0	0	1.40977	0.683038	1.76505	1.46697	2.09101	0	0	0	0.270842	0.694797	0.715101	0.594479	0.388049	1.38825	0.9714	1.64241	0.86741	0.817798	0	1.16031	0.636142	0.612393	2.21842	2.04439	2.08697	2.6032	2.37489
srna24325	AGCAACATTGTACAGGGCTATGA	23	2	hsa-miR-103a-3p:1-23(1);hsa-miR-103b:1-23(-1)	5.00682	0.873592	1.90354	0	0.434913	5.35114	3.05353	2.21773	2.89201	0.788364	1.59011	1.27495	1.78996	2.52593	3.0327	0.611804	3.54315	1.67219	1.84355	1.36608	3.23592	1.83371	0.784128	2.65744	0	2.34111	1.08337	1.38959	2.23469	1.18896	2.03726	1.6659	3.5618	3.69543	3.12268	0.817798	4.06519	0.773538	1.06024	0.408262	1.66382	0.817757	2.31886	0.685053	1.51993
srna41970	AGCAGCCTTGTACAGGGCTATGA	23	2	hsa-miR-103a-3p:1-23(1);hsa-miR-103b:1-23(-1)	0.83447	0	0.543868	0	0	9.42819	7.52731	3.16818	2.38165	3.41624	0.706717	0.212491	0.481912	0.91214	0.0379087	0.101967	0	0	0.542219	0	0.294174	1.83371	0	0	0	0	0	0.347398	0.35755	0.356687	0.0970123	0.27765	0	0	0	0	0	0.386769	0.636142	0	5.17632	2.45327	4.8696	3.56228	3.79982
srna28471	AGCAGCATTGTACAGGGCTATGATG	25	2	hsa-miR-103a-3p:1-23(1);hsa-miR-103b:1-23(-1)	0.417235	0	0	0	0	5.16002	4.75783	2.85136	0.170118	0.175192	0.176679	0.424982	1.2392	3.15741	5.2314	0	28.3452	0	1.08444	0.683038	0	0	0	0	0	0.585278	8.12525	0	3.84367	0.356687	1.5522	0	0	0	0	0	0	0	0	0	0	0.613318	0	0	0.0949955
srna46419	GCAGCATTGTACAGGGCTCTGA	22	2	hsa-miR-103a-3p:2-19(1);hsa-miR-103b:5-22(-1)	0	0.873592	0.271934	0	0	0.382224	0.568099	0.316818	0.340236	0.525576	1.06008	1.27495	0.963825	1.26296	2.12289	1.01967	0	0.334437	2.81954	0.683038	2.94174	6.2346	2.87514	0	0	0.195093	0	0	0	0.237792	0.970123	0.83295	0.9714	0.615905	0.86741	0.817798	0	0.386769	0.424095	0	0.184868	0.408878	0.463772	0.411032	0.0949955
srna32522	GCAGCATTGTACAGGGCTA	19	3	hsa-miR-103a-3p:2-20(1);hsa-miR-107:2-20(1);hsa-miR-103b:4-22(-1)	1.25171	0	0.815802	0	0.434913	1.40149	1.06519	1.58409	1.8713	3.67903	1.41343	1.06246	1.03267	2.03477	1.40262	2.03935	0	0.334437	1.62666	0	2.3534	2.93393	2.09101	2.86186	0	2.7313	1.62505	2.08439	1.16204	2.61571	1.5522	0.83295	1.619	1.23181	1.21437	0	0	0.773538	0.636142	0.204131	1.10921	1.43107	0.695658	1.78114	1.99491
srna16649	GCAGCATTGTACAGGGCTATGTT	23	2	hsa-miR-103a-3p:2-22(1);hsa-miR-103b:2-22(-1)	2.08618	1.74718	1.2237	0	1.30474	6.75262	5.82301	3.16818	2.38165	1.83952	1.06008	3.18737	2.6161	3.22757	4.62486	1.83541	0	0	4.98842	2.73215	2.94174	2.20045	0.784128	1.02209	0	4.09695	2.43758	3.12659	5.36326	1.18896	1.45518	3.05415	0.9714	4.72194	2.25527	4.90679	4.06519	0.386769	1.06024	0.612393	2.58816	2.24883	3.2464	2.32918	1.42493
srna2603	GCAGCATTGTACAGGGCTATG	21	2	hsa-miR-103a-3p:2-22(1);hsa-miR-103b:2-22(-1)	13.7688	4.36796	11.0133	0	11.5252	29.2401	34.37	25.9791	25.1775	21.9866	15.3711	17.4243	17.0735	19.8566	45.4905	27.8371	3.54315	10.0331	28.7376	12.9777	30.0058	26.7721	23.0011	28.6186	0	24.7768	17.6047	19.8017	24.9391	9.03608	24.5441	22.7673	31.4086	20.3249	22.5527	2.45339	10.163	9.28245	7.42166	5.71567	19.0414	14.3107	18.7828	24.1139	23.8439
srna12462	GCAGCATTGTACAGGGCTATGAT	23	2	hsa-miR-103a-3p:2-23(1);hsa-miR-103b:1-22(-1)	4.17235	0	5.30271	0	0.217457	8.66374	7.4563	3.485	2.04142	1.48913	2.12015	3.18737	2.54725	3.22757	9.43927	3.05902	0	1.33775	4.12087	1.36608	7.64854	5.50112	2.09101	2.65744	0	3.70676	3.52094	3.47398	6.70407	1.42675	1.94025	3.3318	7.7712	4.72194	5.20446	2.45339	0	1.93384	2.96866	0.408262	4.06711	3.06659	3.01452	1.91815	1.89991
srna1258	GCAGCATTGTACAGGGCTATGA	22	2	hsa-miR-103a-3p:2-23(1);hsa-miR-103b:1-22(-1)	119.329	59.4043	74.5099	0	33.4883	94.7278	66.3255	52.9086	34.7041	34.3376	54.2405	34.8485	45.644	51.6411	62.8906	27.7351	17.7157	13.0431	56.2824	19.1251	72.9553	92.4188	62.4689	45.7898	0	51.1143	42.5222	48.2884	69.7223	19.6178	24.7381	45.8122	61.522	45.577	42.5031	13.9026	26.4237	31.7151	51.3155	39.3973	50.8388	35.5724	41.9713	30.9644	35.5283
srna23123	CAGCATTGTACAGGGCTAT	19	3	hsa-miR-103a-3p:3-21(1);hsa-miR-103b:3-21(-1);hsa-miR-107:3-21(1)	0.83447	0	0.679835	0	0.869826	3.50372	2.48543	1.26727	2.72189	4.20461	2.82687	0.424982	1.78996	1.26296	1.59217	0.917707	3.54315	0	2.38577	0.683038	4.70679	1.83371	2.09101	6.13256	0	3.90186	2.43758	2.08439	2.05591	1.18896	3.49244	2.49885	2.9142	1.43711	1.56134	0	0	0.386769	1.06024	0.816525	4.80658	2.65771	2.08697	5.2064	5.98472
srna6778	CAGCATTGTACAGGGCTATG	20	2	hsa-miR-103a-3p:3-22(1);hsa-miR-103b:2-21(-1)	5.42406	2.62078	7.34222	0	3.91422	14.5245	13.5634	11.0886	9.52661	5.60614	7.24385	7.64968	6.88446	6.17448	11.1452	4.0787	3.54315	1.00331	10.9528	4.78126	11.1786	8.06831	9.67091	8.99442	0	6.63316	14.8963	5.55838	8.40244	1.54565	7.46995	10.8283	19.428	9.03327	7.45973	0	2.03259	4.25446	2.75662	3.47023	7.025	5.31542	10.8986	9.72775	8.92958
srna20673	CAGCATTGTACAGGGCTATGT	21	2	hsa-miR-103a-3p:3-22(1);hsa-miR-103b:2-21(-1)	5.00682	4.36796	0.951769	0	1.95711	3.88594	2.13037	0.950454	2.55177	1.66432	2.12015	1.48744	1.78996	3.57839	1.97125	1.32558	0	0	2.49421	2.04911	1.47087	1.10022	2.09101	5.51931	0	6.24297	3.52094	7.99016	5.45264	1.07006	9.21617	2.2212	2.2666	1.02651	1.38786	0.817798	0	1.16031	0.636142	1.63305	1.66382	1.63551	0.927544	1.50712	2.46988
srna31086	AGCATTGTACAGGGCTATGT	20	2	hsa-miR-103a-3p:4-22(1);hsa-miR-103b:2-20(-1)	10.0136	2.62078	4.89481	0	5.87133	1.91112	1.56227	1.58409	1.53106	1.57673	1.23675	1.27495	0.963825	1.05247	1.85753	0.611804	0	0.668875	1.08444	0.683038	0.294174	0.733483	2.87514	1.83977	0	2.7313	1.35421	2.43179	2.1453	1.18896	2.13427	1.6659	2.2666	1.23181	1.73482	1.6356	0	3.09415	1.69638	2.65371	2.40329	0.408878	0.695658	0.822064	0.664969
srna43445	GAAGCATTGTACAGGGCTATG	21	2	hsa-miR-103a-3p:4-22(1);hsa-miR-103b:2-20(-1)	3.75512	0.873592	2.85531	0	2.39202	1.27408	1.56227	0.633636	0.850591	0.700768	1.41343	1.48744	1.72112	2.87675	0.189544	0	0	0	3.03643	1.36608	2.64757	1.83371	2.09101	0.408837	0	0.975464	0.541683	0	0.35755	0	0	0	0	0	0	0.817798	0	1.16031	1.69638	1.42892	0.369737	0.817757	1.15943	1.09608	0.85496
srna4958	AGCATTGTACAGGGCTATGA	20	2	hsa-miR-103a-3p:4-23(1);hsa-miR-103b:1-20(-1)	86.3677	27.9549	45.6849	0	15.0045	14.9704	10.0127	9.82136	6.12425	4.3798	10.7774	5.94975	7.64175	8.70041	17.8171	6.01608	0	3.00994	10.8444	3.41519	15.0029	15.4031	18.8191	9.40326	0	7.41353	7.31273	9.03236	14.2126	2.49681	4.7536	13.6048	11.0092	12.3181	7.63321	12.267	14.2282	21.2723	28.4144	24.0875	6.84013	6.54206	8.57978	6.16548	5.12976
srna11914	GAAGCATTGTACAGGGCTATGA	22	2	hsa-miR-103a-3p:4-23(1);hsa-miR-103b:1-20(-1)	18.7756	5.24155	10.8774	0	8.26335	5.16002	4.97086	3.485	2.04142	2.2775	10.6008	9.98708	11.0151	12.2086	0.113726	0.101967	0	0	9.32617	3.41519	9.11941	9.53528	9.14816	1.02209	0	1.36565	1.08337	1.0422	1.34081	0	0.194025	0	0.3238	0	0.346964	3.27119	2.03259	6.57507	10.6024	6.73633	2.58816	2.65771	3.2464	2.74021	1.61492
srna42694	AGCTGCATTGTACAGGGCTATG	22	2	hsa-miR-103a-3p:5-22(1);hsa-miR-103b:2-19(-1)	0.83447	0	0.679835	0	0.434913	1.78371	1.27822	0.316818	1.53106	1.57673	3.18023	2.54989	2.75378	3.50823	0.0379087	0	0	0	1.7351	1.36608	0.588349	2.20045	1.82963	0.408837	0	0.585278	0.541683	0.694797	0.893876	0	0	0	0	0	0	0	2.03259	0.386769	0.424095	0.408262	1.29408	1.0222	0.463772	1.09608	1.32994
srna26400	GCATCATTGTACAGGGCTATGA	22	2	hsa-miR-103a-3p:6-23(1);hsa-miR-103b:1-18(-1)	15.8549	6.98874	9.65366	0	4.56659	1.5289	1.42025	0.316818	0.680472	0.262788	1.41343	0.212491	1.72112	2.1751	0.113726	0.101967	0	0	8.13329	1.36608	8.23689	8.06831	6.5344	0.204419	0	0	0	0.347398	0.0893876	0	0	0	0	0	0	2.45339	0	4.25446	5.08914	4.69502	0	0.204439	0.695658	0.411032	0.85496
srna35043	TGTACAGGGCTATGA	15	2	hsa-miR-103b:1-15(-1);hsa-miR-103a-3p:9-23(1)	24.1996	5.24155	9.78962	0	3.69676	2.42075	2.27239	2.85136	0.340236	0.788364	0.176679	0.849964	1.37689	1.54362	0.416996	0.305902	0	0.334437	0.650663	0	1.1767	0.733483	0.522752	0.204419	0	0.390186	0.270842	0.347398	0.893876	1.30785	0	0	0.3238	0.615905	0	3.27119	2.03259	4.64123	6.78552	4.08262	0.924342	0	2.55074	0	1.13995
srna13905	TTGTACAGGGCTATGA	16	2	hsa-miR-103b:1-16(-1);hsa-miR-103a-3p:8-23(1)	40.4718	30.5757	28.4171	0	15.4394	4.65039	2.34341	1.26727	0.510354	0.525576	4.94702	3.82484	5.30104	7.50761	6.40657	0.611804	0	0.668875	2.38577	2.73215	4.11844	2.93393	2.61376	1.43093	0	0.585278	0.812525	3.12659	2.1453	0	0.873111	1.1106	0.3238	1.64241	0.346964	16.356	12.1956	14.3105	22.477	16.7388	3.5125	1.83995	0.927544	0.548042	1.42493
srna10831	ATTGTACAGGGCTATGA	17	2	hsa-miR-103b:1-17(-1);hsa-miR-103a-3p:7-23(1)	94.7124	34.9437	49.8999	0	18.2663	4.14076	3.76365	6.01954	1.70118	0.788364	5.1237	7.86217	2.82263	4.98169	4.92813	1.42754	0	0	3.68709	0	5.58932	4.03416	1.56826	2.65744	0	3.12149	0.270842	1.73699	1.69836	0.237792	1.06714	5.553	0.6476	0	1.73482	13.0848	18.2934	21.6591	36.0481	31.4362	1.84868	0.817757	0.695658	0.548042	2.56488
srna10808	CATTGTACAGGGCTATGA	18	2	hsa-miR-103b:1-18(-1);hsa-miR-103a-3p:6-23(1)	60.4991	39.3116	36.4392	14.7859	14.3521	4.07706	2.62746	1.26727	2.38165	1.31394	6.18377	2.3374	5.30104	4.49053	4.28368	1.63148	0	1.00331	7.9164	2.73215	8.53106	11.0022	7.05715	1.63535	0	0.585278	1.35421	9.72716	8.04488	3.32908	0.485062	3.60945	0.9714	0.205302	0.86741	22.0805	4.06519	17.7914	22.6891	18.3718	2.03355	1.22664	2.31886	0.959074	1.51993
srna34887	GAATCATTGTACAGGGCTATGA	22	2	hsa-miR-103b:1-18(-1);hsa-miR-103a-3p:6-23(1)	9.59641	2.62078	4.21498	0	2.60948	1.78371	1.42025	0.633636	1.02071	0.350384	2.29683	1.69993	2.68494	2.24527	0	0	0	0	3.57865	0	5.00097	6.2346	3.13651	0	0	0	0	0	0	0	0	0	0	0	0	1.6356	2.03259	3.09415	3.18071	3.06197	1.10921	0.408878	0.463772	0.822064	0.759964
srna29614	GCTGCATTGTACAGGGCTATGA	22	2	hsa-miR-103b:1-19(-1);hsa-miR-103a-3p:5-23(1)	2.92065	0	0.543868	0	0.434913	2.42075	2.13037	0.633636	1.70118	1.05115	5.83041	2.97487	4.75028	4.3502	0	0	0	0	2.60265	0.683038	1.1767	1.83371	1.82963	2.04419	0	0.975464	1.08337	0.347398	1.4302	0	0	0	0	0	0	0	0	0	0.424095	0.612393	2.21842	1.0222	0.927544	0.685053	1.04495
srna10401	AGCTGCATTGTACAGGGCTATGA	23	2	hsa-miR-103b:1-19(-1);hsa-miR-103a-3p:5-23(1)	3.33788	4.36796	2.99127	0	0.869826	7.19855	4.82884	7.28681	1.36094	2.1023	20.6715	11.0495	15.2147	15.6467	0.0758174	0	0	0	10.7359	2.04911	8.82523	9.16853	2.87514	2.24861	0	2.92639	2.97926	2.08439	3.66489	0	0	0.27765	0	0	0	0	0	1.54708	1.48433	0.816525	4.43684	3.27103	4.8696	3.69929	4.2748
srna10896	GCATTGTACAGGGCTATGA	19	2	hsa-miR-103b:1-19(-1);hsa-miR-103a-3p:5-23(1)	53.4061	27.9549	28.4171	0	11.9601	4.90521	3.55062	2.85136	2.21154	1.13875	6.53713	3.61235	3.78645	4.70103	4.62486	1.63148	3.54315	0	6.83196	1.36608	6.76601	12.1025	7.84128	2.04419	0	1.75584	2.70842	2.77919	3.03918	0.83227	0.776098	2.49885	3.238	2.25832	2.94919	6.54238	14.2282	17.7914	18.4481	18.9842	3.69737	2.86215	1.39132	1.78114	2.56488
srna43222	AGCATTGTACAGGGCTATGAT	21	2	hsa-miR-103b:1-20(-1);hsa-miR-103a-3p:4-23(1)	5.00682	0	5.30271	0	0.217457	1.78371	0.781136	0.950454	0.680472	0.350384	0.706717	0.424982	0.550757	1.05247	3.0327	0.917707	7.08629	0	0.867551	0.683038	1.1767	1.10022	0.784128	0.613256	0	0	1.08337	0.694797	0.804488	0.356687	0.388049	1.38825	0.9714	1.02651	1.04089	2.45339	0	0.386769	6.57347	0.816525	0.739474	0	0.695658	0.274021	0.189991
srna9663	AGAAGCATTGTACAGGGCTATGA	23	2	hsa-miR-103b:1-20(-1);hsa-miR-103a-3p:4-23(1)	26.703	19.219	15.7722	0	5.87133	10.5112	9.37363	6.01954	4.59319	3.24105	16.0778	10.4121	15.077	16.2782	0.644448	0.101967	0	0	6.28974	0.683038	7.94271	8.43505	5.4889	1.22651	0	1.75584	1.35421	1.0422	2.23469	0	0.194025	0	0.6476	0	0.346964	1.6356	2.03259	5.41477	12.0867	8.36938	5.91579	3.06659	5.33338	3.69929	3.98981
srna35741	AGTAGCATTGTACAGGGCTATGA	23	2	hsa-miR-103b:1-20(-1);hsa-miR-103a-3p:4-23(1)	2.08618	1.74718	0.543868	0	0	3.69483	1.84632	1.58409	1.36094	0.788364	0.353358	1.27495	1.2392	1.33313	1.7438	0.815739	0	0	1.08444	0	1.1767	2.20045	0.261376	1.02209	0	0.585278	0.541683	2.08439	3.66489	0.356687	0.679086	1.6659	0.6476	1.43711	0.693928	0	0	0.773538	0.84819	0.612393	0.369737	1.63551	1.15943	0.822064	0.949955
srna24179	CAGCATTGTACAGGGCTATGAT	22	2	hsa-miR-103b:1-21(-1);hsa-miR-103a-3p:3-23(1)	1.66894	0.873592	1.90354	0	0.217457	4.07706	2.13037	3.80182	1.19083	0.175192	0.706717	0.424982	0.757291	3.22757	3.37388	0.815739	3.54315	1.00331	1.7351	0	2.64757	1.46697	1.0455	0.613256	0	0.975464	0.541683	1.0422	3.39673	0.713375	0.388049	0.5553	0.6476	0	0.86741	0.817798	0	0.773538	1.06024	0	0.739474	0.408878	3.47829	0.274021	0.664969
srna2116	CAGCATTGTACAGGGCTATGA	21	2	hsa-miR-103b:1-21(-1);hsa-miR-103a-3p:3-23(1)	70.5127	12.2303	26.6495	0	20.8758	49.1158	29.9672	31.365	13.9497	14.4533	31.4489	14.0244	23.476	22.593	40.9035	17.3345	3.54315	8.36094	35.7865	3.41519	26.4757	56.4782	25.3535	19.0109	0	18.7289	28.1675	22.2335	28.3359	7.96602	13.0967	31.3744	27.8468	10.0598	13.3581	4.08899	0	20.8855	31.5951	25.3123	28.2849	18.1951	26.435	22.0587	18.1441
srna26135	AACAGCATTGTACAGGGCTATGA	23	2	hsa-miR-103b:1-21(-1);hsa-miR-103a-3p:3-23(1)	5.00682	1.74718	2.58337	0	1.95711	3.50372	2.69847	1.26727	0.680472	0.788364	1.41343	0.637473	1.58343	1.68395	3.9046	1.52951	7.08629	0	2.60265	0.683038	0.882523	1.46697	2.87514	1.83977	0	1.17056	0.812525	2.08439	1.96653	0.713375	1.35817	2.2212	2.9142	2.46362	3.29616	0	2.03259	1.54708	1.69638	1.42892	2.40329	1.83995	2.08697	1.64413	1.42493
srna2097	AGCAGCATTGTACAGGGCTATGAA	24	2	hsa-miR-103b:1-23(-1);hsa-miR-103a-3p:1-22(1)	27.1203	0	18.0836	0	0.869826	32.6164	27.5528	12.9895	7.99555	11.6503	23.4983	25.0739	26.161	24.5576	49.433	16.8246	0	8.0265	21.9057	1.36608	50.3038	25.6719	41.2974	25.9612	0	19.5093	27.6259	42.0352	44.2469	4.51804	14.7459	30.2638	59.903	24.6362	53.9529	0	0	11.2163	34.5637	6.94046	35.3099	27.5993	16.9277	9.45373	17.7642
srna9548	AGCAGCATTGTACAGGGCTATGAAA	25	2	hsa-miR-103b:1-23(-1);hsa-miR-103a-3p:1-22(1)	6.25853	0	5.71061	0	5.0015	10.766	6.53314	1.58409	1.70118	0.963556	7.95057	3.39986	2.20303	4.28004	12.2445	5.60821	0	0.668875	4.77153	0	9.11941	8.80179	15.4212	5.31489	0	0	0	11.8115	6.34652	0	4.46257	25.8214	15.2186	13.5499	12.8377	0	0	8.89569	0	0	1.47895	1.22664	5.33338	0.959074	2.27989
srna28128	AGCAGCATTGTACAGGGCTATGATC	25	2	hsa-miR-103b:1-23(-1);hsa-miR-103a-3p:1-23(1)	0	0	0	0	0	3.94965	3.55062	0	0	0	0	0	0	0.0701646	5.83794	1.32558	0	0	0	0	0	0	0	0	0	0	0	0	8.58121	0	0	8.60715	0	0	0	19.6271	0	0	0	0	5.54605	0	0.231886	0.411032	0
srna9716	AGCAGCATTGTACAGGGCTATGAG	24	2	hsa-miR-103b:1-23(-1);hsa-miR-103a-3p:1-23(1)	0.417235	0	15.2283	0	4.13167	3.88594	6.74617	7.28681	0.510354	3.94182	6.89049	5.73726	4.54374	11.5772	4.70068	4.0787	0	1.33775	7.80796	0	6.76601	1.10022	3.13651	5.51931	0	6.04788	0.812525	8.68496	3.12857	3.92356	3.10439	7.2189	20.0756	6.15905	1.56134	0	0	7.34861	0	0.612393	2.77303	1.0222	4.8696	0.959074	3.89482
srna9182	AGCAGCATTGTACAGGGCTATGATT	25	2	hsa-miR-103b:1-23(-1);hsa-miR-103a-3p:1-23(1)	5.00682	0	1.35967	0	0	19.6208	8.80553	0.633636	2.72189	1.75192	0	1.69993	4.4749	3.78889	16.0354	5.50624	0	0.334437	9.00084	0	13.2379	0.366741	1.56826	2.04419	3.88336	0	17.8756	6.25317	6.61468	0	3.88049	3.60945	30.4372	2.87422	1.04089	0	0	0.386769	0	8.36938	4.25197	2.24883	1.15943	0	0
srna27699	AGCAGCATTGTACAGGGCTATGAAT	25	2	hsa-miR-103b:1-23(-1);hsa-miR-103a-3p:1-23(1)	0	0	0.815802	0	0	4.01335	2.13037	1.90091	0	0.613172	0	0.424982	0.137689	3.3679	7.05102	0.101967	0	0.334437	6.39819	0	2.05922	0	0	4.70163	0	0	0	0	1.78775	0	0.582074	0	0	0	0	0	0	6.96184	0	0	0.924342	0	0	0	0.189991
srna612	AGCAGCATTGTACAGGGCTATGAT	24	2	hsa-miR-103b:1-23(-1);hsa-miR-103a-3p:1-23(1)	149.787	0.873592	107.142	0	24.79	216.211	192.87	124.509	72.6404	40.0314	52.1204	61.8349	94.1794	88.688	301.45	107.474	88.5787	40.1325	103.455	63.5225	187.978	98.2867	90.1747	75.2261	3.88336	94.8151	138.671	124.716	184.049	75.6177	76.3487	173.809	250.621	137.552	155.96	39.2543	2.03259	37.5166	32.8674	16.3305	108.888	67.6694	132.407	33.4306	41.893
srna37855	AGCAGCATTGTACAGGGTTATGA	23	2	hsa-miR-103b:1-23(-1);hsa-miR-103a-3p:1-23(1)	0	0.873592	8.15802	0	0	4.39558	1.1362	3.80182	2.38165	0.087596	0.176679	0.212491	1.92765	3.99938	1.63007	0	0	0	0.325332	0	0.882523	0.366741	0	0	0	0.390186	2.16673	0	1.69836	0.237792	0.485062	0.83295	0.6476	5.95375	0.520446	0	0	0	1.48433	0.408262	6.10066	0.204439	1.15943	0.274021	1.89991
srna23822	AGCAGCATTGTACAGGGCTATGAGT	25	2	hsa-miR-103b:1-23(-1);hsa-miR-103a-3p:1-23(1)	9.59641	0	0	0	6.5237	3.1852	4.18973	0.633636	0	3.24105	0	0	1.37689	1.89444	3.18433	3.16099	0	0	0.108444	0	5.00097	4.03416	0	0	0	0	1.62505	0.347398	0.446938	4.04246	0	0	0	0	6.24535	0	0	0	0	0	9.79803	0.204439	0.927544	0	1.70992
srna16070	AGCAGAATTGTACAGGGCTATGA	23	2	hsa-miR-103b:1-23(-1);hsa-miR-103a-3p:1-23(1)	22.5307	8.73592	15.3643	0	3.4793	0.382224	0.0710123	0	0.170118	0.175192	7.59721	3.61235	2.96032	4.5607	8.60528	2.85509	0	0.334437	0.216888	0	0.588349	0.366741	0.261376	1.02209	0	1.95093	0.812525	0.347398	1.34081	4.28025	4.94763	6.94125	7.4474	7.18556	7.80669	2.45339	4.06519	5.80153	9.54213	7.34872	0.184868	0	0	0	0.0949955
srna9730	AGCATCATTGTACAGGGCTATGA	23	2	hsa-miR-103b:1-23(-1);hsa-miR-103a-3p:1-23(1)	43.8097	22.7134	19.5792	0	11.5252	2.54816	2.05936	0.950454	1.19083	0.87596	1.23675	2.3374	1.99649	2.31543	0.113726	0.203935	0	0	24.0745	7.51341	30.8883	33.0067	24.0466	0.204419	0	0	0	0	0.178775	0.118896	0.194025	0.27765	0	0.205302	0	5.72459	2.03259	8.89569	16.7517	12.2479	0.924342	0.408878	1.39132	0.411032	0.664969
srna33230	ATTGTACAGGGCTATG	16	2	hsa-miR-103b:2-17(-1);hsa-miR-103a-3p:7-22(1)	17.9411	4.36796	12.509	0	8.04589	0.573336	0.781136	0.316818	0.170118	0.350384	1.94347	1.91242	0.757291	1.1928	0.606539	0.203935	0	0.668875	2.27732	0	3.53009	2.20045	1.0455	0.817675	0	0.585278	0	0.694797	0.715101	0	0.0970123	0.27765	0.6476	0.205302	0	2.45339	6.09778	7.34861	12.9349	8.16525	0.184868	0.204439	0	0.137011	0.474978
srna28176	CATTGTACAGGGCTATG	17	2	hsa-miR-103b:2-18(-1);hsa-miR-103a-3p:6-22(1)	17.1066	7.86233	9.38172	0	9.56809	1.21038	0.994173	0.633636	0.850591	0.525576	2.47351	0.849964	1.51458	2.03477	0.8719	0.509837	0	0	3.36176	1.36608	3.82427	2.93393	3.13651	1.22651	0	0.975464	1.35421	0.694797	1.4302	0.475583	0.679086	1.38825	1.2952	0.410603	0.346964	4.90679	8.13038	6.1883	8.26985	5.9198	1.10921	0.613318	0.695658	1.09608	0.284987
srna19466	GCATTGTACAGGGCTATG	18	2	hsa-miR-103b:2-19(-1);hsa-miR-103a-3p:5-22(1)	18.7756	1.74718	13.4607	0	8.26335	2.93038	2.98252	1.90091	1.8713	2.1023	2.12015	2.3374	1.72112	2.80658	3.14642	1.52951	0	0	4.22931	1.36608	2.64757	5.86786	4.44339	2.24861	0	2.34111	1.89589	1.73699	1.69836	0.83227	2.13427	1.6659	1.9428	1.84771	1.21437	2.45339	2.03259	5.80153	8.90599	6.94046	0.924342	1.63551	1.15943	1.50712	1.89991
srna37605	AGAAGCATTGTACAGGGCTATG	22	2	hsa-miR-103b:2-20(-1);hsa-miR-103a-3p:4-22(1)	2.50341	1.74718	2.85531	0	3.04439	1.40149	2.41442	0.633636	2.38165	1.31394	2.65019	4.24982	3.37339	3.22757	0.0758174	0.203935	0	0	3.14487	0	1.47087	2.20045	2.61376	0	0	0.195093	0	0.347398	0.178775	0	0	0	0	0	0	0.817798	2.03259	1.93384	1.90843	0.612393	1.47895	1.0222	1.39132	1.64413	1.99491
srna11209	AGCATTGTACAGGGCTATG	19	2	hsa-miR-103b:2-20(-1);hsa-miR-103a-3p:4-22(1)	13.7688	4.36796	11.1493	0	9.35063	5.03262	6.10706	6.01954	3.91272	3.24105	3.18023	3.18737	2.54725	3.22757	8.98436	3.77279	0	1.33775	7.1573	2.04911	3.53009	3.66741	8.62541	5.11047	3.88336	4.68223	3.52094	3.47398	5.27387	2.49681	4.36555	4.9977	7.7712	4.92724	5.37794	2.45339	4.06519	6.1883	6.99757	5.71567	2.21842	2.24883	4.8696	3.97331	3.70483
srna39743	GCAGCATTGTACAGGGCTATGG	22	2	hsa-miR-103b:2-22(-1);hsa-miR-103a-3p:2-22(1)	2.08618	0	1.08774	0	0.65237	1.84742	0.994173	0.950454	1.53106	0.963556	1.59011	0.849964	0.89498	0.841975	2.65361	1.63148	0	0	1.19288	0	1.47087	1.46697	1.30688	0.817675	0	0.585278	1.62505	0.694797	1.60898	0	0.776098	1.38825	1.2952	1.64241	0.86741	0	0	1.16031	0.424095	0.816525	0.184868	0.204439	0.927544	1.09608	0.664969
srna8205	GCAGCATTGTACAGGGCTATGT	22	2	hsa-miR-103b:2-22(-1);hsa-miR-103a-3p:2-22(1)	10.4309	5.24155	6.79835	0	8.91572	10.4475	7.88237	4.75227	6.97484	8.93479	3.53358	5.52477	5.43872	5.26234	7.46802	2.44722	7.08629	0.334437	7.1573	1.36608	4.11844	4.76764	6.79578	11.0386	0	11.5105	7.85441	8.68496	12.5143	4.39914	8.34306	6.94125	6.476	6.98026	6.59232	4.08899	0	4.64123	2.96866	4.28675	4.06711	4.49766	5.10149	5.75445	5.79473
srna1624	AGCAGCATTGTACAGGGCTATGG	23	2	hsa-miR-103b:2-23(-1);hsa-miR-103a-3p:1-22(1)	26.703	12.2303	16.0441	0	8.48081	49.6254	33.1628	22.1773	23.1361	18.6579	23.4983	21.0366	19.3453	24.7681	72.3677	33.2414	14.1726	9.69869	43.2691	18.442	56.7757	62.7128	42.8657	43.1323	7.76672	49.7487	27.6259	42.3826	57.4762	24.2547	37.9318	50.2546	56.0174	45.7823	55.6877	6.54238	0	16.6311	12.0867	7.34872	26.8059	16.3551	28.2901	18.9075	23.7489
srna33884	AGCAGCATTGTACAGGGTTATG	22	2	hsa-miR-103b:2-23(-1);hsa-miR-103a-3p:1-22(1)	0	15.7247	0.543868	0	0	1.21038	0.142025	0	0.340236	0.700768	0	0.424982	0.757291	3.22757	2.1608	0.40787	0	0	4.77153	0	0	0	0.261376	2.86186	0	0.585278	0.812525	6.94797	1.4302	0	0.0970123	3.60945	0	0	0	0	0	0	0.212047	0	3.69737	3.06659	1.15943	2.87722	0.85496
srna797	AGCAGCATTGTACAGGGCTATGTT	24	2	hsa-miR-103b:2-23(-1);hsa-miR-103a-3p:1-22(1)	15.8549	14.8511	22.0267	0	21.9631	184.869	130.663	132.113	66.3461	63.3319	42.7564	112.833	70.2215	96.2658	162.628	57.8155	0	24.7484	90.1169	52.5939	80.0155	107.822	36.0699	60.9168	3.88336	90.1329	76.6482	73.3011	142.037	37.2144	71.4981	161.315	81.2738	159.519	138.265	30.2585	73.1734	5.41477	36.0481	25.1081	86.3336	61.5362	65.3918	43.9804	40.9431
srna259	AGCAGCATTGTACAGGGCTATG	22	2	hsa-miR-103b:2-23(-1);hsa-miR-103a-3p:1-22(1)	147.701	36.6909	155.138	0	172.226	338.141	365.501	277.216	379.363	323.142	273.499	179.13	182.989	242.699	982.935	410.521	382.66	174.911	520.205	239.063	387.722	424.32	449.305	512.478	15.5334	397.794	236.987	261.591	312.946	187.974	551.321	298.196	451.053	350.039	371.945	33.5297	103.662	102.494	129.137	81.4483	231.825	187.266	203.132	471.865	420.45
srna29950	AGCATTGTACAGGGCTAT	18	3	hsa-miR-103b:3-20(-1);hsa-miR-107:4-21(1);hsa-miR-103a-3p:4-21(1)	2.08618	2.62078	2.71934	0	1.30474	2.48446	1.63328	1.26727	2.38165	2.36509	1.41343	0.424982	1.10151	0.841975	1.59217	0.509837	3.54315	0.334437	3.25332	1.36608	2.64757	4.4009	3.13651	2.86186	0	2.14602	0.812525	1.0422	1.34081	1.42675	2.91037	1.1106	1.9428	0.821207	1.21437	0	0	0.773538	2.96866	0.612393	1.29408	1.43107	0.927544	3.01423	2.1849
srna4452	AGCAGCATTGTACAGGGCTATT	22	3	hsa-miR-103b:3-23(-1);hsa-miR-103a-3p:1-21(1);hsa-miR-107:1-21(1)	0	24.4606	3.26321	0	6.74115	17.2001	17.8951	1.58409	20.2441	25.7532	8.65728	18.2742	3.99299	3.01708	7.3922	2.44722	0	2.6755	22.7732	0	12.6495	6.60135	1.82963	30.254	0	32.9707	35.7511	10.7694	13.5869	9.39277	57.0432	19.1578	7.4474	4.51664	9.02107	0.817798	0	0	0.212047	2.24544	3.69737	8.99533	9.97109	27.2651	32.3935
srna4415	AGCAGCATTGTACAGGGCTATA	22	3	hsa-miR-103b:3-23(-1);hsa-miR-103a-3p:1-21(1);hsa-miR-107:1-21(1)	0	0	3.53514	0	0	8.79115	17.9661	7.92045	9.18638	31.0966	2.82687	14.6619	6.19602	8.34959	12.6236	8.36133	31.8883	2.34106	25.9181	0.683038	20.0039	19.0706	43.1271	23.0993	0	13.2663	20.0423	19.1069	18.1457	5.46921	8.92513	6.94125	5.8284	9.23857	16.6543	0	0	0	0	0.612393	5.36118	7.15537	10.6668	17.4003	12.5394
srna2430	AGCAGCATTGTACAGGGCTA	20	3	hsa-miR-103b:4-23(-1);hsa-miR-103a-3p:1-20(1);hsa-miR-107:1-20(1)	11.2653	0	13.3248	0	6.5237	16.8179	15.5517	19.9595	29.4304	75.6829	16.9612	24.224	9.50056	10.1037	22.6694	32.0178	3.54315	12.7086	36.5456	2.73215	37.9485	22.738	37.6382	63.5742	19.4168	38.2382	17.6047	51.415	20.9167	45.4182	67.0355	12.7719	32.38	27.3051	14.052	12.267	2.03259	7.73538	3.81685	5.9198	15.7138	24.1238	16.0001	49.8719	42.083
srna8865	AGCAGCATTGTACAGGGCTAA	21	3	hsa-miR-103b:4-23(-1);hsa-miR-103a-3p:1-20(1);hsa-miR-107:1-20(1)	0	0	0	0	0	4.65039	4.33175	6.33636	4.25295	5.51855	9.364	5.31228	1.72112	1.26296	5.68631	2.75312	0	0.668875	14.8568	0.683038	28.2408	2.20045	2.61376	28.2098	0	16.5829	0.270842	11.1168	8.58121	14.6242	12.5146	2.2212	3.5618	9.85448	0	0	0	0	0	6.73633	3.69737	0.817757	6.72469	2.32918	4.74978
srna40502	AGCATTGTACAGGGCT	16	3	hsa-miR-103b:5-20(-1);hsa-miR-107:4-19(1);hsa-miR-103a-3p:4-19(1)	0.417235	0	1.49564	0	1.95711	0.382224	1.27822	1.58409	2.21154	3.76663	0.706717	1.27495	0.688446	0.420988	1.02354	0.917707	0	0.334437	2.06043	1.36608	0.882523	0.733483	1.0455	0.408837	0	0.975464	2.97926	1.38959	0.804488	1.07006	2.13427	1.1106	1.619	0.615905	0.693928	2.45339	0	2.32061	0.212047	2.04131	0.184868	0.408878	0.695658	2.46619	4.2748
srna29583	CAGCATTGTACAGGGCT	17	3	hsa-miR-103b:5-21(-1);hsa-miR-107:3-19(1);hsa-miR-103a-3p:3-19(1)	0	0.873592	1.08774	0	1.95711	1.5926	1.42025	1.58409	2.72189	5.86893	1.23675	1.48744	0.89498	1.1928	1.47844	1.01967	0	1.00331	4.12087	2.73215	4.11844	2.20045	0.522752	2.86186	0	2.14602	1.62505	2.08439	1.16204	1.90233	2.61933	0.5553	1.2952	0.410603	0.693928	0	0	0.773538	0	1.42892	1.29408	1.43107	1.6232	4.65836	7.02967
srna1739	AGCAGCATTGTACAGGGCTCTGA	23	2	hsa-miR-103b:5-23(-1);hsa-miR-103a-3p:1-19(1)	42.1408	19.219	22.0267	0	10.8728	7.77189	6.24909	3.80182	2.38165	3.15346	53.3571	34.8485	48.0535	48.9047	84.6502	30.1824	24.802	11.7053	82.9596	21.8572	103.549	123.225	80.5038	1.22651	0	2.53621	1.35421	1.73699	2.1453	19.9745	22.8949	43.3134	54.0746	54.4049	47.7076	4.08899	6.09778	8.89569	14.6313	13.4727	5.73092	3.67991	2.31886	3.97331	2.37489
srna16494	AGCAGCATTGTACAGGGCTCTGT	23	3	hsa-miR-103b:5-23(-1);hsa-miR-103a-3p:1-19(1);hsa-miR-107:1-18(1)	2.50341	1.74718	1.76757	0	1.95711	0.828152	0.497086	0.633636	0.850591	0.963556	3.88694	3.39986	3.37339	4.28004	8.37783	3.36492	3.54315	2.00662	8.78395	1.36608	4.41262	5.86786	6.5344	0	0	0.195093	0.541683	0	0.268163	4.04246	5.82074	4.16475	6.476	3.07952	2.94919	0.817798	0	3.09415	0.424095	0.612393	0.184868	0.408878	0.463772	0	0.664969
srna594	AGCAGCATTGTACAGGGCT	19	3	hsa-miR-103b:5-23(-1);hsa-miR-103a-3p:1-19(1);hsa-miR-107:1-19(1)	26.703	21.8398	33.3119	81.3225	62.6275	85.1722	79.8889	98.2136	223.365	562.98	69.0816	80.3216	71.8049	60.6924	140.831	101.865	109.838	57.8577	240.42	63.5225	167.974	124.692	89.1292	234.673	0	172.657	179.026	231.367	89.9239	182.386	352.737	81.9067	54.7222	72.8821	65.7497	21.2627	12.1956	58.0153	0.424095	42.4593	84.6697	140.45	126.378	487.758	495.972
srna36425	AGCATTGTACAGGGC	15	3	hsa-miR-103b:6-20(-1);hsa-miR-103a-3p:4-18(1);hsa-miR-107:4-18(1)	2.92065	1.74718	1.90354	0	3.04439	0.891856	0.852148	1.90091	4.08283	5.60614	0.883396	1.69993	1.99649	1.12263	0.796083	0.713772	0	0.668875	1.95199	0	0.588349	1.10022	0.784128	0.817675	0	1.36565	0.541683	1.0422	0.804488	0.83227	1.5522	0.83295	1.619	0.205302	1.9083	2.45339	4.06519	8.89569	2.33252	2.85784	0.924342	2.24883	1.6232	6.85053	3.60983
srna23864	CAGCATTGTACAGGGC	16	3	hsa-miR-103b:6-21(-1);hsa-miR-107:3-18(1);hsa-miR-103a-3p:3-18(1)	1.25171	4.36796	1.6316	0	5.43641	1.5926	1.34923	2.53454	6.63461	10.4239	2.29683	1.91242	1.78996	1.47346	0.416996	1.12164	0	0.668875	4.12087	0	2.94174	1.10022	1.82963	3.2707	0	2.34111	7.58357	2.43179	1.96653	1.30785	3.29842	0.83295	1.2952	1.23181	2.42875	0.817798	2.03259	3.09415	1.69638	2.65371	4.25197	3.67991	5.33338	9.72775	5.98472
srna15348	AGCAGCATTGTACAGGGCG	19	3	hsa-miR-103b:6-23(-1);hsa-miR-103a-3p:1-18(1);hsa-miR-107:1-18(1)	0	0.873592	1.2237	0	0.434913	1.97482	2.05936	3.485	5.44378	11.5627	2.12015	2.12491	1.03267	0.77181	4.43532	4.28263	0	1.67219	4.77153	0.683038	5.29514	6.60135	3.39789	5.72372	0	4.68223	4.06263	3.82138	2.23469	4.51804	13.3877	1.1106	0	1.64241	1.04089	0	0	1.16031	0	0.204131	2.03355	2.45327	2.55074	16.5783	13.5844
srna3780	AGCAGCATTGTACAGGG	17	3	hsa-miR-103b:7-23(-1);hsa-miR-103a-3p:1-17(1);hsa-miR-107:1-17(1)	27.1203	1.74718	5.16675	0	1.95711	12.1675	18.7473	12.6727	14.9704	30.4834	10.0707	22.0991	13.8378	10.0335	19.3334	9.27903	3.54315	1.00331	16.8088	1.36608	5.88349	11.7357	17.2508	42.3147	0	12.0958	24.9174	13.8959	18.0563	12.1274	9.11916	2.7765	7.4474	20.5302	30.7063	2.45339	0	12.3766	16.3277	28.7825	23.2934	24.7371	26.8988	36.4448	21.279
srna30573	AAAAGTGCTTACAGTGCAGGT	21	1	hsa-miR-106a-5p:1-21(1)	0	0	0	0	0	1.5926	1.27822	0	3.57248	1.48913	0	0.212491	2.27187	0.140329	1.85753	0.713772	0	0.334437	0.108444	0	15.5912	8.06831	7.57991	7.56349	0	1.36565	0	0	1.78775	0.594479	2.03726	6.6636	5.5046	1.43711	0	0	0	0	0	0	3.88224	2.45327	0	3.8363	3.89482
srna6034	AAAAGTGCTTACAGTGCAGGTAG	23	1	hsa-miR-106a-5p:1-23(1)	0	0	0.951769	0	6.5237	9.87412	6.10706	5.70272	5.27366	11.1247	14.4877	1.06246	5.85179	5.82366	6.9752	10.7066	7.08629	2.34106	37.63	0	45.3029	19.0706	31.8879	12.674	0	12.681	31.9593	3.82138	7.77672	13.5541	1.64921	6.38595	11.6568	8.21207	6.7658	0	0	0	6.78552	0	17.0079	2.45327	24.1161	5.75445	7.31466
srna41981	AAAAGTGCTTACAGTGCAGGTAGT	24	1	hsa-miR-106a-5p:1-23(1)	0	0	0	0	0	4.14076	0	0	4.59319	0	0.706717	0	1.8588	0	0.720266	1.22361	0	0	1.7351	0	0	0	6.5344	0	0	0	0	0	3.39673	2.8535	0.485062	0	1.9428	2.87422	0.520446	0	0	0	0	0	2.03355	0	2.55074	0	0
srna19515	CCGCACTGTGGGTACT	16	1	hsa-miR-106b-3p:1-16(1)	0	0	0	0	0.869826	4.01335	0.213037	0.633636	6.80472	11.5627	2.65019	0	1.65227	0.140329	0.530722	2.75312	28.3452	0	0.325332	0	20.298	0	3.39789	2.04419	0	0.390186	0	8.33756	8.75999	7.96602	5.43269	0.27765	0	0	0.520446	0	0	0	0	0	0.369737	2.04439	0	11.7829	7.31466
srna23592	CCGCACTGTGGGTACTTG	18	1	hsa-miR-106b-3p:1-18(1)	0.417235	0	1.08774	0	0.434913	0.700744	0.710123	1.26727	8.16567	11.7379	4.06362	0.212491	0.206534	2.24527	0.568631	3.36492	0	0.334437	1.08444	0	1.47087	0.733483	3.92064	3.2707	0	1.75584	6.77104	7.64277	0.625713	5.46921	4.36555	0.5553	0.6476	3.69543	2.77571	0.817798	0	0.386769	0.212047	0	0.554605	0.204439	2.78263	10.2758	12.3494
srna8138	CCGCACTGTGGGTACTTGC	19	1	hsa-miR-106b-3p:1-19(1)	4.17235	1.74718	0.815802	0	6.74115	9.36449	8.23743	0.633636	16.3313	17.6944	5.1237	0.424982	4.61259	6.7358	1.70589	3.16099	3.54315	1.33775	11.3866	2.73215	7.35436	2.20045	1.30688	13.2872	3.88336	6.24297	2.43758	13.5485	5.54203	3.21019	24.1561	2.2212	13.9234	1.02651	6.93928	0	0	3.86769	5.51323	0.612393	5.73092	3.67991	4.63772	29.4573	34.7684
srna27830	TACCGCACTGTGGGTACTTGC	21	1	hsa-miR-106b-3p:1-19(1)	0	0	0.407901	0	0.869826	1.14667	2.55644	0.633636	5.44378	3.94182	1.41343	1.27495	3.30454	0.841975	0.189544	1.32558	0	0.334437	3.79554	0.683038	2.3534	3.30067	1.0455	3.2707	0	6.82825	1.35421	1.73699	1.34081	1.18896	6.20879	1.94355	1.2952	0.205302	0.693928	0	0	0.386769	0.424095	0	0.369737	0.613318	1.39132	10.2758	4.1798
srna37377	CCGCACTGTGGGTACTTGCG	20	1	hsa-miR-106b-3p:1-19(1)	0.417235	3.49437	0	0	0.869826	0.700744	1.06519	0	2.55177	2.1023	0.883396	0	0.550757	0.701646	0.947718	0.713772	0	0.334437	1.7351	0	0	1.10022	0.522752	4.08837	0	1.56074	0.812525	1.0422	1.16204	1.42675	9.02214	0.5553	1.619	0.205302	0.346964	0	0	0.386769	0.636142	0.612393	0.924342	0.817757	0.695658	4.93238	4.55979
srna5533	ACCGCACTGTGGGTACTTGCT	21	1	hsa-miR-106b-3p:1-20(1)	1.66894	10.4831	7.47818	0	11.5252	8.21782	4.40276	1.58409	35.7248	37.5787	6.53713	5.09978	5.23219	7.22695	3.41178	5.91411	3.54315	0.334437	11.3866	39.6162	18.8272	6.60135	23.7852	12.674	0	14.0467	6.77104	7.64277	15.0171	2.37792	35.4095	2.49885	0.9714	14.987	4.33705	0	4.06519	3.09415	9.33009	0.816525	10.1678	1.63551	11.1305	39.322	40.3731
srna436	CCGCACTGTGGGTACTTGCT	20	1	hsa-miR-106b-3p:1-20(1)	78.023	34.9437	84.5715	7.39295	158.961	122.758	124.059	108.985	584.866	482.654	185.867	62.6849	73.8703	137.663	75.6658	69.6437	120.467	42.4736	285.533	150.268	123.259	166.867	97.4933	291.297	23.3002	330.682	145.713	207.049	222.575	187.499	663.467	165.757	180.68	94.4387	187.361	19.6271	89.4342	105.588	104.539	38.1725	87.073	136.974	114.088	651.759	688.148
srna746	TACCGCACTGTGGGTACTTGCT	22	1	hsa-miR-106b-3p:1-20(1)	34.2133	21.8398	31.1364	0	71.3257	64.1499	50.0637	44.9881	268.106	223.195	104.771	42.4982	36.2123	80.8296	22.1008	23.4525	170.071	33.1093	233.371	83.3306	154.736	178.236	53.3207	174.369	62.1338	179.095	102.107	113.947	104.315	91.1931	322.372	107.728	100.054	52.9678	84.3123	0	24.3911	61.1095	37.7444	10.819	43.2592	43.75	89.0442	359.653	377.227
srna17303	CCGCACTGTGGGTACTTGCTGT	22	1	hsa-miR-106b-3p:1-21(1)	0	0	13.7327	0	0	6.94374	0.213037	6.96999	12.2485	2.54028	0	0	3.51108	3.15741	4.62486	1.12164	0	0	0.108444	0	0	14.6697	0	0	0	3.12149	0	1.0422	5.36326	5.46921	8.73111	0.27765	0	1.84771	0	0	0	0	2.33252	0	0	1.63551	0	14.3861	13.0144
srna5377	CCGCACTGTGGGTACTTGCTG	21	1	hsa-miR-106b-3p:1-21(1)	0.83447	0	4.07901	0	0	11.4667	5.68099	1.58409	27.0488	23.7385	14.1343	1.27495	8.3302	18.8041	6.33076	5.60821	0	0	8.24173	0.683038	12.0612	30.0728	12.5461	8.17675	0	17.5584	11.3754	4.86358	6.07836	6.65816	55.491	3.8871	11.333	7.18556	6.24535	32.7119	0	11.2163	10.1783	7.75698	9.9829	2.45327	6.72469	28.9092	41.418
srna9132	CCGCACTGTGGGTACTTGCTGA	22	1	hsa-miR-106b-3p:1-21(1)	0	0	2.0395	0	3.69676	3.05779	4.47378	1.26727	25.6878	9.37277	6.53713	0	3.8553	7.99876	3.26015	4.18066	0	0	14.8568	0.683038	29.7116	0	1.82963	11.6519	0	9.75464	0.270842	0	4.20122	2.49681	21.3427	9.4401	0	4.92724	8.84758	18.8094	0	4.64123	0.212047	0.204131	5.36118	3.88435	0.463772	19.3185	25.1738
srna7474	CCGCACTGTGGGTACTTGCTGCA	23	1	hsa-miR-106b-3p:1-22(1)	0	24.4606	8.70189	0	8.69826	6.17929	9.2316	4.43545	16.3313	12.9642	7.77389	0	4.81912	9.61255	6.06539	2.75312	0	2.6755	20.4959	0	6.76601	16.1366	14.3757	7.15466	0	15.8025	0.270842	0	6.79346	3.56687	13.0967	3.05415	0	7.59616	9.54151	0	0	0	0	7.14459	8.13421	0.408878	5.33338	13.016	17.5742
srna18019	CCGCACTGTGGGTACTTGCTGCT	23	1	hsa-miR-106b-3p:1-22(1)	0	0	6.39045	0	3.04439	6.94374	3.26657	0	10.037	3.94182	0	0.849964	2.13418	0	3.4876	1.83541	0	1.67219	0	0	0	14.6697	0	0.204419	0	2.7313	0	10.7694	3.84367	2.02123	6.11178	11.9389	0	0	0	0.817798	0	3.09415	0	0	1.47895	5.31542	0	14.2491	5.79473
srna25138	CCGCACTGTGGGTACTTGCTGC	22	1	hsa-miR-106b-3p:1-22(1)	15.0205	1.74718	4.89481	0	0	4.20446	1.7043	0.316818	4.93343	1.13875	3.35691	1.69993	2.75378	2.24527	3.44969	0.40787	0	0.668875	0.650663	0	0.882523	0.366741	0.522752	1.63535	0	0.585278	2.70842	0	0.268163	0.118896	6.69385	0.5553	1.2952	0.205302	0.173482	0	0	0	3.39276	8.36938	0.739474	0.817757	4.40583	4.38434	3.70483
srna9441	CGCACTGTGGGTACTTGCT	19	1	hsa-miR-106b-3p:2-20(1)	5.00682	2.62078	2.58337	0	5.87133	3.75854	4.26074	2.53454	17.0118	14.9789	4.41698	3.18737	2.89147	4.20988	1.21308	1.73345	3.54315	0.668875	10.6275	2.73215	5.58932	5.86786	4.96615	10.0165	0	11.7056	3.52094	7.64277	5.89958	6.30148	19.7905	4.16475	3.8856	2.46362	5.20446	1.6356	8.13038	6.96184	3.81685	2.24544	3.88224	2.86215	3.2464	23.7028	22.6089
srna32481	GCACTGTGGGTACTTGCT	18	1	hsa-miR-106b-3p:3-20(1)	0.83447	0.873592	1.35967	0	1.5222	0.95556	0.852148	0.316818	5.27366	3.76663	0.530038	0.849964	0.757291	1.1928	0.492813	0.305902	0	0.668875	1.95199	2.73215	1.47087	1.83371	2.35238	1.83977	0	2.34111	2.16673	2.77919	2.1453	0.475583	3.78348	1.38825	1.2952	0.410603	0.520446	0	2.03259	3.48092	0.84819	0.612393	0.739474	1.22664	0.927544	6.57651	6.55469
srna31596	CACTGTGGGTACTTGCT	17	1	hsa-miR-106b-3p:4-20(1)	5.00682	6.98874	7.61415	0	11.9601	0.63704	1.34923	0.633636	3.40236	2.45269	1.06008	0.637473	0.619602	1.1928	0.30327	0.101967	0	0	3.14487	2.73215	0.882523	2.56719	0.261376	1.83977	0	2.34111	1.62505	1.38959	0.983264	2.49681	2.71634	0.5553	0.3238	0	1.21437	4.08899	6.09778	14.3105	7.42166	1.83718	0.739474	0	0.463772	3.69929	4.65478
srna12044	TAAAGTGCTGACAGT	15	1	hsa-miR-106b-5p:1-15(1)	0	3.49437	2.99127	0	0	1.97482	1.20721	12.3559	4.42307	5.69374	8.4806	0.212491	3.71761	4.3502	4.73859	2.54918	0	2.34106	0.433775	0	0	0	4.70477	4.49721	3.88336	3.70676	16.5213	1.73699	1.78775	8.20381	4.07452	11.3836	8.095	1.23181	3.46964	0	0	0	0	0.204131	2.9579	6.13318	7.18846	5.89146	2.75487
srna5585	TAAAGTGCTGACAGTG	16	1	hsa-miR-106b-5p:1-16(1)	0.417235	2.62078	7.88609	0	4.78404	2.42075	7.17225	13.94	2.38165	12.2634	3.00355	4.24982	4.88797	11.0158	13.3818	9.48297	0	2.6755	4.22931	0.683038	8.53106	0.366741	3.92064	26.1656	0	20.6798	16.5213	23.9705	8.31305	7.60933	9.70123	7.2189	13.2758	14.5764	16.6543	11.4492	0	0	0	9.7983	9.9829	23.9194	3.01452	7.67259	7.12466
srna8668	TAAAGTGCTGACAGTGC	17	1	hsa-miR-106b-5p:1-17(1)	4.17235	0	0	0	0.65237	2.73927	2.41442	3.485	5.6139	2.1899	3.88694	3.61235	3.09801	3.15741	4.32159	5.20034	0	5.01656	7.48263	0.683038	12.6495	6.2346	6.5344	15.5358	0	8.38899	11.3754	12.1589	4.64816	15.8131	7.95501	17.2143	14.2472	17.2453	9.19455	1.6356	0	0.386769	0	0.204131	1.47895	4.7021	7.88412	3.42527	4.2748
srna1929	TAAAGTGCTGACAGTGCA	18	1	hsa-miR-106b-5p:1-18(1)	0	0	2.44741	0	9.78554	8.21782	15.7647	23.7613	20.2441	19.6215	14.1343	15.7243	20.5845	16.9798	29.076	26.2056	3.54315	15.0497	38.0638	5.4643	37.9485	41.4418	35.5471	44.5633	0	49.3585	66.0854	86.5022	37.364	70.1485	32.5961	42.2028	112.682	87.0479	49.0954	0	0	7.73538	0.212047	6.73633	19.9658	38.0257	20.8697	10.5498	22.3239
srna12212	TAAAGTGCTGACAGTGCAGG	20	1	hsa-miR-106b-5p:1-19(1)	0.417235	0	0.271934	0	0.65237	1.78371	1.56227	0.316818	3.40236	2.71548	3.71026	1.91242	1.65227	2.59609	3.18433	6.93378	0	1.33775	3.68709	3.41519	4.41262	4.4009	10.455	6.95024	0	9.36446	12.7296	11.8115	6.16774	10.225	7.17891	7.7742	4.857	5.54314	6.41883	0	0	0.773538	0.424095	0.204131	2.21842	3.67991	2.08697	1.50712	2.0899
srna660	TAAAGTGCTGACAGTGCAG	19	1	hsa-miR-106b-5p:1-19(1)	21.6962	0	18.0836	0	2.60948	28.1572	29.6121	27.88	31.4718	28.6439	100.53	83.084	67.7431	67.779	84.1953	149.382	42.5178	57.1888	197.585	89.4779	379.485	247.917	410.622	141.458	7.76672	156.855	146.796	116.378	72.9403	328.509	118.355	240.722	199.461	195.858	154.052	0	2.03259	10.4428	6.14938	5.10328	28.2849	90.5666	32.2321	27.8132	42.463
srna37956	TAAAGTGCTGACAGTGCAGC	20	1	hsa-miR-106b-5p:1-19(1)	0.417235	0	0.407901	0	0.217457	0.063704	0	0	0	0.087596	2.12015	1.69993	1.78996	1.54362	2.84315	4.28263	0	2.00662	1.51821	1.36608	4.41262	2.20045	3.65926	0.204419	0	0	0	0	0	4.28025	0.582074	2.49885	2.2666	2.66892	1.9083	0	0	0.773538	0	0.408262	0	0	0	0	0.189991
srna9192	TAAAGTGCTGACAGTGCAGCT	21	1	hsa-miR-106b-5p:1-19(1)	0.83447	0	0.951769	0	0.217457	0.254816	0.284049	0	0.170118	0.175192	15.5478	6.37473	7.15984	7.36728	5.30722	4.79247	10.6294	2.00662	14.9653	4.09823	20.8864	23.4714	29.0127	1.02209	0	0.780371	0.812525	0	0.536326	5.23141	6.59684	12.2166	11.0092	10.881	5.89839	0	0	0	0.636142	0	0.184868	0.613318	0.463772	0.137011	0.284987
srna45841	TAAAGTGCTGACAGTGCAGT	20	1	hsa-miR-106b-5p:1-19(1)	0	0	0	0	0	0.509632	1.42025	0	0	0	0	0	0	1.82428	1.47844	0.101967	0	0	0.650663	0	10.5903	0.366741	0.784128	0	0	4.09695	0.270842	2.77919	1.16204	1.90233	0.0970123	0.27765	0	0.205302	1.73482	0	0	0	0	6.32807	0.184868	0.204439	0	1.37011	0.949955
srna43275	TAAAGTGTTGACAGTGCAGA	20	1	hsa-miR-106b-5p:1-20(1)	0	0	1.08774	0	0	0.31852	0.568099	0.950454	1.02071	0.700768	1.06008	0.424982	1.92765	0.350823	1.09935	1.93738	0	0.668875	0.542219	0	0.588349	0.733483	1.56826	1.22651	0	0.975464	1.35421	1.73699	2.68163	2.02123	1.5522	3.3318	0.3238	1.64241	1.56134	0	0	0	0.212047	1.22479	0.369737	1.63551	0.695658	0.274021	1.04495
srna22506	TAAATTGCTGACAGTGCAGA	20	1	hsa-miR-106b-5p:1-20(1)	2.92065	0.873592	2.44741	0	1.73965	0.063704	0.284049	0	1.02071	0.175192	1.41343	0.637473	0.757291	0.701646	0.0758174	0	0	0	10.4106	4.09823	17.6505	13.2027	26.6604	0	0	0	0	0.347398	0	0	0	0	0	0	0	0.817798	0	1.16031	2.33252	1.42892	1.10921	0.817757	0.927544	0.411032	0.189991
srna198	TAAAGTGCTGACAGTGCAGA	20	1	hsa-miR-106b-5p:1-20(1)	102.223	34.9437	92.4576	0	50.2325	184.614	218.079	247.752	264.023	237.736	362.369	308.537	269.596	212.458	367.411	664.012	375.574	172.904	416.208	289.608	684.838	484.099	941.738	1002.67	77.6672	1106.76	1152.16	1105.77	559.388	1402.14	542.008	1102.55	949.381	871.095	728.278	25.3517	50.8149	63.4301	72.0961	51.0328	255.303	428.709	301.684	197.98	265.322
srna19575	TAAAGTGCTGACAGTGCAGAA	21	1	hsa-miR-106b-5p:1-20(1)	0	0	0	0	0	0.700744	0.639111	3.485	5.6139	0.262788	2.12015	8.28715	4.19952	1.40329	1.36471	3.67083	0	0	2.16888	0	3.82427	6.96809	10.9778	12.674	0	7.02334	0	1.73699	2.59224	1.54565	1.26116	0.27765	14.571	4.51664	3.12268	0	0	0	0	0	3.5125	3.27103	5.33338	0.685053	0.664969
srna15066	TAAAGTGCTGACAGTGCAGATAGT	24	1	hsa-miR-106b-5p:1-20(1)	0	0	0.679835	0	0	1.97482	1.49126	9.82136	3.91272	0	4.77034	0	1.17036	2.52593	3.29806	2.75312	0	0	4.33775	0	1.76505	2.93393	9.67091	13.6961	0	16.9731	12.4587	19.8017	2.68163	1.30785	5.14165	7.2189	7.7712	2.25832	8.84758	0	0	0	0	8.36938	0	2.65771	1.39132	0	7.02967
srna5892	TAAAGTGCTGACAGTGCAGATT	22	1	hsa-miR-106b-5p:1-20(1)	0	0	0	0	0	7.51707	2.41442	0.316818	2.72189	7.79604	0.530038	20.8241	8.53673	8.9109	9.5909	5.40427	0	1.33775	24.0745	0	13.2379	1.46697	2.35238	7.97233	0	11.5105	16.2505	13.5485	17.7881	9.03608	16.007	20.5461	45.9796	20.3249	11.9703	0	0	0	0	0	10.9072	10.8353	3.94206	4.24733	4.46479
srna6037	TAAAGTGCTGACAGTGCAGATA	22	1	hsa-miR-106b-5p:1-21(1)	22.9479	0	0	7.39295	0	3.2489	3.4796	2.53454	3.91272	3.06586	16.6078	0	10.8086	10.1739	10.8419	3.26296	0	2.34106	0.650663	0	23.2398	14.6697	11.5005	18.3977	0	14.8271	17.063	8.33756	10.6371	11.414	12.0295	14.4378	15.8662	15.3976	17.3482	0	0	0	5.30119	0	7.025	8.17757	10.8986	3.42527	2.56488
srna34264	TAAAGTGCTGACAGTGCAGATG	22	1	hsa-miR-106b-5p:1-21(1)	7.093	0	0	0	0	0.127408	1.56227	0	0	0	0	0.212491	0	0.210494	1.47844	0.815739	0	0	5.31375	0	0.294174	12.8359	16.7281	0	0	8.1939	5.95852	1.73699	0.715101	0	4.94763	3.05415	1.619	1.02651	0.173482	0	0	0	0	0	0	0.204439	0	0	0
srna289	TAAAGTGCTGACAGTGCAGAT	21	1	hsa-miR-106b-5p:1-21(1)	39.6373	27.9549	29.7768	0	21.7457	134.734	184.49	175.2	259.6	155.133	324.56	258.814	221.404	241.226	170.21	161.516	297.624	86.6193	409.593	174.858	530.102	603.29	720.875	754.714	27.1835	687.117	453.931	505.117	348.344	361.443	384.072	690.793	549.488	521.261	416.01	0	10.163	3.09415	36.8963	6.73633	154.55	217.114	168.117	178.662	237.014
srna22097	TAAAGTGCTGACAGTGCAGATAG	23	1	hsa-miR-106b-5p:1-21(1)	0	0	0	0	0	1.01926	1.56227	0.633636	0	0.700768	6.18377	0	1.58343	0.77181	1.02354	3.56886	0	0	6.50663	0	0	0.733483	3.92064	1.02209	0	8.97427	0.270842	1.0422	3.39673	7.13375	0.485062	3.8871	0	13.1393	4.8575	0	0	0	0	0	1.66382	0.204439	0	1.2331	1.42493
srna30579	TAAATTGCTGACAGTGCAGAT	21	1	hsa-miR-106b-5p:1-21(1)	2.50341	0.873592	0.543868	0	0.217457	0.191112	0.426074	0.316818	0.340236	0.350384	0.883396	1.48744	0.826135	0.701646	0	0	0	0	8.35018	6.14734	8.53106	15.4031	16.7281	0	0	0	0	0	0	0	0	0	0	0	0	0	2.03259	0.386769	1.27228	0	0.184868	0.817757	0.463772	0.411032	0.379982
srna15970	AAAGTGCTGACAGTGCA	17	1	hsa-miR-106b-5p:2-18(1)	0	0	0.407901	0	0.434913	1.97482	1.98835	3.80182	2.89201	1.22634	1.06008	2.3374	2.75378	1.40329	0.227452	0.40787	0	0.334437	0.759107	0	1.76505	3.30067	2.09101	8.79	0	7.60862	13.5421	15.2855	4.73754	15.8131	4.65659	6.94125	12.3044	6.36435	4.33705	0	0	0.773538	0.212047	0.408262	2.40329	4.29322	0.927544	1.37011	2.84987
srna6211	AAAGTGCTGACAGTGCAG	18	1	hsa-miR-106b-5p:2-19(1)	1.66894	0	0.951769	0	0	2.54816	3.90568	2.21773	4.59319	3.76663	10.0707	7.86217	9.15633	5.96399	2.04707	4.6905	0	1.33775	5.53064	1.36608	10.5903	7.70157	11.7619	28.0054	3.88336	20.8749	18.1464	16.3277	7.32978	40.6624	12.9026	21.6567	21.047	25.6627	15.6134	0	0	0.773538	0.212047	0	2.58816	5.92874	2.31886	2.05516	5.03476
srna1498	AAAGTGCTGACAGTGCAGA	19	1	hsa-miR-106b-5p:2-20(1)	4.58959	1.74718	3.39917	0	2.39202	16.6267	14.6996	16.1577	15.1405	27.1548	34.0991	23.799	25.4037	16.6992	5.11768	7.44362	0	3.34437	7.80796	10.9286	16.1796	8.43505	23.7852	168.85	34.9502	121.738	118.087	179.605	56.5824	164.076	56.0731	108.561	89.6926	111.684	65.2292	0	2.03259	4.25446	3.81685	4.08262	24.0329	35.9813	18.5509	15.3452	30.5886
srna2569	AAAGTGCTGACAGTGCAGAT	20	1	hsa-miR-106b-5p:2-21(1)	1.66894	0.873592	1.2237	0	1.08728	11.0845	12.3561	12.0391	17.8624	16.5556	31.8023	13.5994	16.5227	13.6821	2.72943	2.03935	7.08629	1.67219	9.21773	2.04911	12.3553	20.9043	17.2508	108.138	0	72.7696	51.7308	71.2167	31.0175	39.949	35.9916	76.6314	40.1512	56.0473	37.9926	0	4.06519	0	2.75662	0.612393	9.05855	16.9685	8.81166	11.7829	25.9338
srna31333	AAGTGCTGACAGTGCA	16	1	hsa-miR-106b-5p:3-18(1)	0.417235	0	0	0	0	0.63704	0.639111	1.90091	0.680472	0.700768	1.06008	1.48744	1.44574	0.982304	0.227452	0.305902	0	0	0.542219	0	0.588349	0.733483	0.261376	4.29279	0	3.90186	5.95852	10.0746	3.30734	5.35031	1.45518	1.94355	2.5904	2.66892	2.77571	0	0	0.773538	0	0	1.29408	1.63551	1.15943	0.959074	0.759964
srna16170	AAGTGCTGACAGTGCAG	17	1	hsa-miR-106b-5p:3-19(1)	0	0	0.407901	0	0	0.828152	1.06519	0.950454	1.53106	0.700768	3.88694	2.3374	4.19952	2.66625	1.17517	2.54918	0	0.668875	1.95199	2.73215	3.23592	2.56719	3.92064	7.35907	0	8.58408	7.58357	13.2011	3.93305	10.225	3.88049	10.5507	5.8284	12.3181	7.80669	0	0	0	0.212047	0	0.554605	1.83995	0.927544	1.64413	0.949955
srna3883	AAGTGCTGACAGTGCAGA	18	1	hsa-miR-106b-5p:3-20(1)	3.33788	0	1.08774	0	1.30474	3.44002	4.40276	3.485	3.91272	6.39451	20.1414	6.37473	9.98247	9.89321	2.12289	2.54918	0	1.33775	2.16888	0.683038	5.00097	2.93393	6.79578	42.5191	15.5334	55.4064	49.8349	73.6485	38.6154	31.7452	17.5592	42.7581	24.285	40.6497	43.197	0	4.06519	1.54708	2.96866	2.04131	9.42829	7.56425	8.11601	8.90569	2.84987
srna7368	AAGTGCTGACAGTGCAGAT	19	1	hsa-miR-106b-5p:3-21(1)	0.417235	0.873592	0.679835	0	0.65237	1.84742	3.33758	6.33636	3.06213	4.73018	12.3675	4.24982	6.95331	6.7358	1.06144	0.917707	0	0.668875	2.7111	2.04911	4.70679	6.96809	5.75027	28.2098	0	33.7511	21.1257	28.4867	19.1289	4.28025	11.7385	30.5415	11.333	12.3181	17.5217	0	0	0	0.84819	0.612393	3.32763	3.06659	1.85509	4.79537	1.42493
srna16293	AGTGCTGACAGTGCA	15	1	hsa-miR-106b-5p:4-18(1)	0	0	0	0	0.217457	0.382224	1.27822	3.485	2.55177	1.75192	1.23675	1.48744	2.47841	2.66625	0.30327	0.611804	0	0.334437	0.867551	0	0.882523	0.366741	0.522752	4.70163	0	11.7056	10.5628	18.4121	11.2628	4.87473	4.26854	6.1083	5.8284	6.15905	6.93928	0	0	0.773538	0	0.612393	2.58816	2.04439	5.33338	3.28825	1.42493
srna9149	AGTGCTGACAGTGCAG	16	1	hsa-miR-106b-5p:4-19(1)	1.66894	0.873592	0.407901	0	0	0.700744	1.98835	2.21773	2.04142	2.54028	8.65728	5.09978	5.0945	7.43745	0.947718	1.63148	0	1.00331	4.87997	1.36608	3.23592	3.66741	3.13651	13.0828	0	25.9473	15.438	25.3601	12.1567	11.414	7.76098	17.7696	8.4188	16.8347	18.5626	0	2.03259	0.773538	0	0	2.40329	2.45327	1.15943	3.28825	0.664969
srna2080	AGTGCTGACAGTGCAGA	17	1	hsa-miR-106b-5p:4-20(1)	2.50341	5.24155	3.26321	0	2.60948	3.88594	7.17225	10.1382	9.18638	15.6797	30.7422	8.71213	13.6312	17.471	3.44969	3.97673	0	1.67219	4.12087	3.41519	5.58932	5.86786	8.88679	58.6682	23.3002	151.197	104.274	166.404	105.835	26.6327	26.8724	79.6855	34.9704	71.445	83.2714	2.45339	6.09778	2.32061	2.12047	2.85784	19.0414	8.17757	10.4349	17.8114	5.41474
srna4032	AGTGCTGACAGTGCAGAT	18	1	hsa-miR-106b-5p:4-21(1)	0.417235	1.74718	0.815802	0	1.08728	2.03853	5.1839	7.60363	9.01626	9.02239	20.8481	8.49964	7.91713	10.5949	1.17517	0.815739	0	1.00331	4.98842	2.04911	2.94174	7.33483	4.70477	31.2761	3.88336	83.1095	42.5222	58.0155	52.6493	5.5881	19.7905	45.2569	15.8662	36.1331	41.1152	0	0	0.386769	0.84819	0.204131	8.31908	4.29322	3.01452	11.9199	4.84477
srna17050	GTGCTGACAGTGCAG	15	1	hsa-miR-106b-5p:5-19(1)	0	0	0.543868	0	0.217457	0.382224	0.781136	0.950454	1.19083	2.54028	4.77034	1.91242	2.54725	3.85905	1.02354	0.40787	0	0.668875	1.95199	1.36608	0.882523	1.83371	1.56826	4.08837	0	11.9007	10.5628	13.2011	6.88285	3.44798	3.58946	11.9389	4.5332	8.41737	8.84758	0	0	0	0	0	2.21842	1.83995	1.6232	1.78114	1.04495
srna24519	TAATGTGCTGACAGTGCAGA	20	1	hsa-miR-106b-5p:5-20(1)	0.417235	0	0.271934	0	0.217457	0.509632	0.92316	1.26727	1.36094	1.31394	8.83396	3.82484	6.67793	4.06955	0	0	0	0	3.4702	0.683038	5.58932	3.66741	6.5344	2.04419	0	3.90186	4.87515	6.25317	2.32408	0	0	0.27765	0	0	0.173482	0	0	0.386769	0	0.204131	2.21842	1.83995	1.39132	0.548042	1.32994
srna7012	GTGCTGACAGTGCAGA	16	1	hsa-miR-106b-5p:5-20(1)	2.50341	0	1.90354	0	1.08728	1.08297	2.20138	3.485	2.21154	5.95653	13.6043	2.54989	5.43872	5.82366	1.47844	1.01967	0	0.334437	1.95199	0	2.05922	2.93393	1.30688	8.79	7.76672	43.3106	24.1049	59.0577	30.9281	7.72823	6.11178	22.212	8.7426	23.4044	18.5626	0	0	1.16031	1.48433	1.02066	5.73092	2.86215	3.2464	5.06939	1.80491
srna35551	TAATGTGCTGACAGTGCAGAT	21	1	hsa-miR-106b-5p:5-21(1)	0	0	0.135967	0	0.217457	0.573336	0.426074	0.633636	2.21154	0.700768	6.53713	3.18737	4.68143	4.98169	0	0	0	0	3.68709	0.683038	2.05922	2.20045	4.44339	3.88396	0	4.29204	0.812525	3.47398	1.34081	0	0	0	0	0	0	0	0	0	0	0	0.739474	1.43107	0.695658	0.822064	0.759964
srna12598	GTGCTGACAGTGCAGAT	17	1	hsa-miR-106b-5p:5-21(1)	0.417235	0	0.407901	0	0	0.382224	1.63328	4.11863	1.8713	4.4674	7.59721	2.12491	3.78645	3.22757	0.909809	0.305902	0	0.334437	2.49421	1.36608	0.882523	3.30067	0.261376	8.58559	0	26.7277	7.04189	24.6653	14.2126	2.49681	4.65659	14.4378	2.9142	10.6757	10.7559	0	0	0	0.212047	0.408262	2.9579	2.04439	1.6232	2.74021	1.70992
srna43137	TGCTGACAGTGCAGA	15	1	hsa-miR-106b-5p:6-20(1)	2.08618	0	0.815802	0	0.869826	0.254816	0.284049	0.633636	0	0.350384	1.76679	0.424982	0.963825	1.47346	0.0379087	0.203935	0	0	0.650663	0	1.1767	0.733483	0.784128	2.65744	0	8.1939	2.70842	6.60057	3.12857	0.951166	0.776098	1.94355	0.3238	2.66892	1.9083	0.817798	0	0.773538	0.636142	0.816525	0.554605	0.204439	0.695658	0.411032	0.284987
srna36579	GCTGACAGTGCAGAT	15	1	hsa-miR-106b-5p:7-21(1)	0.83447	0.873592	1.2237	0	0.65237	0.382224	0.639111	0.316818	0.170118	0.525576	1.94347	1.91242	1.03267	0.91214	0.265361	0	0	0	1.62666	0.683038	1.47087	0.733483	2.61376	2.04419	0	6.43806	2.43758	8.68496	3.12857	0.118896	0.679086	1.1106	0.9714	2.46362	1.9083	0	2.03259	0.386769	1.06024	0	0.924342	0.817757	0.463772	0.959074	0.379982
srna23399	AGCAGCATTGTACAGG	16	3	hsa-miR-107:1-16(1);hsa-miR-103b:8-23(-1);hsa-miR-103a-3p:1-16(1)	0	0	0.135967	0	0	1.84742	3.05353	0.950454	3.23224	7.00768	4.77034	2.12491	1.44574	0.982304	1.3268	2.44722	0	0	2.27732	1.36608	2.64757	1.10022	0.784128	1.63535	0	3.90186	4.33347	2.43179	1.34081	3.56687	2.61933	1.6659	4.857	1.02651	2.94919	0.817798	0	0.386769	0.84819	2.24544	2.21842	2.04439	6.26092	7.39857	3.70483
srna27992	AGCAGCATTGTACAGGGTT	19	3	hsa-miR-107:1-17(1);hsa-miR-103a-3p:1-17(1);hsa-miR-103b:7-23(-1)	1.25171	0	0	0	0	3.1852	1.91733	2.85136	2.04142	4.4674	4.2403	1.27495	1.44574	0.701646	1.59217	0.509837	0	0	5.20531	0	0	0	0	6.5414	0	5.26751	0	1.38959	4.02244	5.707	3.58946	0	0	0	0	0	0	0	0	0	1.47895	8.79089	3.94206	1.37011	3.32484
srna20405	AGCAGCATTGTACAGGGCAA	20	3	hsa-miR-107:1-18(1);hsa-miR-103b:6-23(-1);hsa-miR-103a-3p:1-18(1)	0	0	0	0	0	2.48446	4.33175	8.55408	3.57248	3.76663	0	0	4.33721	0.210494	4.01832	3.46689	0	0	2.92798	0	8.23689	0	4.70477	0	0	4.68223	3.52094	8.68496	0.715101	9.03608	1.5522	0.27765	2.2666	0	2.08178	16.356	0	0	0	0	1.47895	0.204439	8.34789	2.05516	2.75487
srna551	AGCAGCATTGTACAGGGC	18	3	hsa-miR-107:1-18(1);hsa-miR-103b:6-23(-1);hsa-miR-103a-3p:1-18(1)	83.0298	110.946	36.7111	0	110.25	105.303	84.0076	209.417	485.517	788.364	120.495	115.17	167.499	87.1444	67.6291	70.3575	7.08629	66.2186	214.61	26.6385	90.0174	54.6445	126.767	168.441	0	109.837	245.112	166.404	107.623	82.9892	203.823	84.9609	121.101	83.7631	215.985	51.5213	46.7497	206.535	71.0359	98.3912	201.322	291.939	217.045	788.633	439.449
srna26456	AGCAGCATTGTACAGGGCTAAA	22	3	hsa-miR-107:1-19(1);hsa-miR-103a-3p:1-19(1);hsa-miR-103b:4-23(-1)	0	0	0	0	0	0.828152	4.47378	0	1.8713	1.66432	0	8.49964	3.44223	0	1.13726	1.01967	0	1.33775	10.0853	0	0	17.9703	2.35238	2.04419	0	2.14602	0	0	0.268163	3.68577	1.06714	3.05415	0.9714	7.18556	1.21437	0	0	0	1.90843	6.73633	0	0	2.78263	3.97331	0.569973
srna6216	AGCAGCATTGTACAGGGCTATAA	23	3	hsa-miR-107:1-21(1);hsa-miR-103a-3p:1-21(1);hsa-miR-103b:3-23(-1)	20.0273	0.873592	0.407901	0	1.95711	6.94374	2.69847	4.43545	7.31508	10.5991	12.3675	10.1996	10.189	17.1202	4.89022	4.58853	0	1.67219	7.37418	0	33.8301	5.50112	11.2392	2.04419	0	10.9252	10.5628	19.1069	11.3522	4.87473	0.776098	19.9908	11.6568	12.5234	17.6952	0	0	0	0	5.10328	11.277	4.7021	4.17395	5.2064	10.7345
srna2695	AGCAGCATTGTACAGGGCTATCT	23	1	hsa-miR-107:1-22(1)	27.9548	0	10.0616	0	9.35063	53.0017	35.1511	19.6427	14.8003	8.32162	14.8411	7.0122	13.287	11.086	74.1115	16.6207	0	32.7749	4.01242	15.7099	7.35436	10.2688	0.522752	12.0607	0	2.53621	8.12525	7.64277	51.7554	13.7919	9.89525	39.7039	50.8366	7.18556	22.8996	0	0	5.41477	0.212047	7.14459	24.7724	15.7418	17.1596	6.71352	3.32484
srna1878	AGCAGCATTGTACAGGGCTATC	22	1	hsa-miR-107:1-22(1)	28.7892	20.0926	1.2237	0	5.21896	85.6182	55.0346	31.6818	17.1819	18.3076	4.94702	18.0617	9.70709	22.172	97.3496	29.3666	0	53.1756	30.5812	11.6116	17.9446	75.182	24.5694	23.0993	0	13.0712	14.6255	20.8439	49.2526	5.707	27.3575	5.553	25.5802	13.3446	26.3693	0	0	6.57507	0	0.204131	29.9487	21.4661	13.9132	8.35765	11.6844
srna37164	AGCAGCATTGTACAGGGCTATCAA	24	1	hsa-miR-107:1-22(1)	0	0	0	0	0	3.63113	2.13037	3.485	0	0.525576	0	0	0	0.561317	4.09414	0.101967	0	3.34437	0	0	0	0	3.92064	0	0	0	0	7.99016	2.50285	0	2.23128	8.8848	0	0	3.64312	0	0	0	0	0	0.739474	0	2.08697	0	0
srna10821	AGCAGCATTGTACAGGGCTATCA	23	1	hsa-miR-107:1-23(1)	30.0409	0.873592	6.11851	0	0	14.4608	7.38528	4.43545	0	3.06586	2.82687	0	10.6709	1.47346	14.0641	2.54918	3.54315	9.02981	0	0	9.70776	0	0.261376	2.86186	0	4.29204	2.97926	11.1168	8.22366	2.14012	5.5297	1.1106	0	8.00676	0	0	0	3.86769	0	0	1.47895	0	2.55074	0.137011	0.379982
srna33743	GCAGCATTGTACAGGG	16	3	hsa-miR-107:2-17(1);hsa-miR-103b:7-22(-1);hsa-miR-103a-3p:2-17(1)	0.417235	0	0.407901	0	0.65237	1.08297	1.1362	2.21773	3.7426	5.95653	1.76679	1.69993	1.30805	1.61379	1.59217	0.815739	0	1.67219	1.84355	0	1.47087	0.733483	1.30688	2.45302	0	0.780371	1.35421	1.73699	1.69836	1.07006	1.35817	1.1106	2.2666	1.02651	1.73482	0.817798	0	1.54708	0.84819	2.65371	2.9579	2.24883	2.55074	6.02847	2.56488
srna9038	GCAGCATTGTACAGGGC	17	3	hsa-miR-107:2-18(1);hsa-miR-103b:6-22(-1);hsa-miR-103a-3p:2-18(1)	3.75512	11.3567	2.44741	0	7.39352	4.20446	4.68681	11.0886	20.5843	27.8555	4.77034	6.37473	8.3302	3.99938	2.69152	4.3846	0	2.6755	9.97684	2.73215	6.76601	4.03416	5.4889	8.38117	0	3.70676	8.12525	8.68496	4.55877	2.61571	7.17891	3.3318	5.1808	1.23181	5.37794	4.90679	2.03259	12.3766	5.08914	7.75698	9.79803	10.4264	10.4349	27.2651	18.4291
srna9480	GCAGCATTGTACAGGGCT	18	3	hsa-miR-107:2-19(1);hsa-miR-103a-3p:2-19(1);hsa-miR-103b:5-22(-1)	1.66894	0	2.17547	14.7859	6.08878	3.75854	4.0477	6.96999	12.2485	24.4393	3.71026	5.09978	2.75378	3.85905	5.98958	3.97673	3.54315	3.00994	10.5191	4.78126	6.76601	9.53528	3.39789	8.99442	0	4.87732	9.7503	9.72716	4.20122	5.23141	10.4773	4.4424	5.8284	4.31133	0.693928	0.817798	2.03259	5.028	0.212047	2.24544	3.32763	7.76869	4.40583	22.1957	18.3341
srna7866	GCAGCATTGTACAGGGCTAT	20	3	hsa-miR-107:2-21(1);hsa-miR-103b:3-22(-1);hsa-miR-103a-3p:2-21(1)	1.66894	1.74718	4.07901	0	3.4793	9.5556	7.66933	5.06909	12.4186	14.8913	9.01064	5.52477	3.92414	5.40267	6.9752	4.3846	3.54315	0.668875	9.21773	6.83038	8.82523	9.53528	5.4889	10.6298	0	15.4123	7.58357	9.37976	9.29631	4.99362	12.6116	3.3318	8.4188	3.69543	6.24535	0	0	2.70738	2.12047	1.22479	6.4704	5.11098	5.33338	13.016	15.1043
srna44109	GCAGCATTGTACAGGGCTATC	21	1	hsa-miR-107:2-22(1)	1.66894	0.873592	0	0	0.217457	2.86668	2.20138	1.26727	0.170118	0.613172	0	0.424982	0.206534	0.561317	3.33597	0.509837	0	2.00662	1.30133	0.683038	0.588349	2.93393	1.30688	1.22651	0	0.975464	0	1.0422	1.69836	0.118896	0.776098	0.27765	1.2952	0	0	0	0	0.386769	0	0	1.66382	0.817757	0.231886	0.137011	0
srna26124	CAAATTCGTATCTAGGGGAAT	21	1	hsa-miR-10a-3p:1-21(1)	0	0	0	0	0	2.54816	0	3.80182	3.7426	2.89067	4.2403	4.6748	3.64876	0.350823	2.95688	2.54918	0	0	0	0	1.47087	0	0	0.817675	0	0	1.62505	0	4.55877	0.118896	0.776098	8.60715	0	3.07952	4.51053	0	0	0	0	0	3.5125	2.04439	1.85509	3.01423	4.36979
srna25302	TACCCTGTAGATCCGA	16	1	hsa-miR-10a-5p:1-16(1)	1.25171	0.873592	1.90354	0	1.73965	1.40149	0.426074	1.90091	2.89201	4.99297	8.83396	0.637473	1.30805	0.982304	0.227452	0.815739	0	0	0.650663	0	0	0	0.522752	6.95024	0	3.70676	2.16673	15.2855	7.50856	1.90233	3.88049	1.1106	0.6476	1.23181	1.9083	0	2.03259	1.16031	0.84819	2.65371	2.9579	1.83995	0.463772	2.6032	4.08481
srna4496	TACCCTGTAGATCCGAA	17	1	hsa-miR-10a-5p:1-17(1)	0	2.62078	5.57465	0	10.003	5.86077	5.89402	25.0286	30.1109	22.5122	15.3711	10.6246	16.9358	3.99938	7.24056	7.54559	0	0	17.5679	9.56253	0	0.366741	16.7281	30.254	0	6.63316	11.1045	35.4346	27.7102	22.5902	14.2608	10.273	9.0664	17.2453	26.8897	0	24.3911	16.2443	0.424095	12.2479	19.7809	36.7991	10.8986	26.032	27.8337
srna5720	TACCCTGTAGATCCGAAT	18	1	hsa-miR-10a-5p:1-18(1)	8.76194	2.62078	4.75884	0	23.7028	6.94374	3.05353	1.58409	40.8283	46.0755	6.71381	8.49964	15.6966	5.33251	3.63924	4.89444	0	4.34769	9.32617	0	3.53009	0.733483	0.261376	14.7181	3.88336	1.17056	21.9382	16.3277	17.6987	7.84712	18.9174	13.3272	0.6476	5.74845	12.8377	0.817798	0	1.16031	0.212047	3.06197	12.2013	32.3014	5.33338	47.4057	45.1229
srna14349	TACCCTGTAGATCCGAATATGT	22	1	hsa-miR-10a-5p:1-18(1)	0	0	0	0	0	0	0	0	0	0	0	0	0	0	0.0379087	0	0	0	0.433775	0	0	0	0.261376	15.7402	0	8.1939	13.5421	18.0647	5.18448	7.25264	13.7757	3.60945	4.857	18.2718	24.8079	0	0	0.386769	0	0	0	0	0	0.137011	0.189991
srna16825	TACCCTGTAGATCCGAATTA	20	1	hsa-miR-10a-5p:1-19(1)	0	0	3.94304	0	0	2.61186	0	0.950454	0.850591	4.11701	6.71381	1.27495	5.43872	3.08724	0.416996	1.42754	0	0	5.31375	0	0	0	0	2.86186	0	0.195093	13.5421	0.347398	6.88285	3.80466	8.53708	21.379	0.9714	0	2.60223	0	0	0	4.87709	0	9.05855	3.67991	0.695658	4.11032	0.85496
srna2759	TACCCTGTAGATCCGAATT	19	1	hsa-miR-10a-5p:1-19(1)	20.8618	11.3567	5.98255	0	20.006	20.1942	14.6285	14.5736	48.6538	81.9023	16.6078	32.9361	17.5554	17.05	9.06018	17.7423	0	9.36425	44.3535	1.36608	11.767	17.2368	11.5005	37.8175	3.88336	15.4123	63.377	19.1069	46.3028	18.7855	61.0207	30.8191	19.1042	12.3181	46.4932	9.81357	0	19.3384	2.54457	27.3536	24.9572	39.4568	10.8986	60.8327	49.6827
srna1185	TACCCTGTAGATCCGAATTT	20	1	hsa-miR-10a-5p:1-20(1)	27.5375	48.0476	37.3909	0	59.1482	62.1114	55.6737	49.4236	76.383	180.886	52.4737	40.5858	42.2017	67.779	31.9191	20.2915	0	5.01656	48.2575	18.442	16.7679	54.6445	16.9894	80.7454	3.88336	35.3118	80.44	79.9016	96.2705	37.9278	186.749	62.4712	46.3034	42.4974	127.509	9.81357	10.163	56.855	21.6288	52.6658	110.182	78.3002	39.1887	142.08	98.7953
srna1640	TACCCTGTAGATCCGAATTTGA	22	1	hsa-miR-10a-5p:1-21(1)	78.4402	145.016	53.9789	0	37.4025	32.9987	20.3805	31.6818	22.2855	69.1132	26.6786	25.4989	35.9369	35.6436	23.5792	9.58494	0	1.00331	35.7865	0	0	17.6036	24.8307	30.4584	0	37.2627	27.355	43.4248	42.3697	24.0169	60.9237	76.6314	49.8652	30.5899	122.131	0	4.06519	69.2316	45.8022	115.742	70.6197	52.5409	39.6525	38.0889	30.7785
srna8568	ATACCCTGTAGATCCGAATTTG	22	1	hsa-miR-10a-5p:1-21(1)	40.0546	0	8.02205	0	0	6.88003	6.8882	8.55408	3.06213	17.8696	2.12015	10.837	6.40255	7.36728	8.49155	6.83182	14.1726	3.67881	3.79554	0	0	7.70157	0	3.2707	0	5.26751	0.270842	8.33756	8.75999	5.46921	22.7979	7.2189	0	5.54314	12.4907	0	0	12.3766	7.84576	0	10.7224	1.43107	1.85509	3.28825	10.3545
srna216	TACCCTGTAGATCCGAATTTG	21	1	hsa-miR-10a-5p:1-21(1)	381.77	560.846	317.891	14.7859	357.499	374.898	384.603	322.204	473.269	1057.81	305.302	370.159	315.928	450.807	318.623	212.296	88.5787	53.8444	313.62	36.201	93.2533	297.061	77.6287	619.389	77.6672	345.314	664.104	671.174	748.174	323.04	1040.94	527.257	537.184	319.449	979.826	207.721	241.879	736.021	307.045	329.468	561.815	678.329	245.103	684.642	609.301
srna16195	TACCCTGTAGATCCGAATTTGG	22	1	hsa-miR-10a-5p:1-21(1)	4.58959	0	2.99127	7.39295	2.17457	2.73927	2.69847	0.950454	1.8713	7.79604	1.23675	2.3374	1.8588	2.31543	2.1608	1.42754	3.54315	0.668875	2.16888	0	0	1.46697	0	4.70163	7.76672	1.95093	2.70842	4.16878	7.59795	2.14012	11.7385	2.7765	3.5618	3.90073	7.63321	0.817798	2.03259	6.57507	3.60481	6.12393	3.14276	5.31542	1.15943	4.24733	4.55979
srna29096	TACCCTGTAGATCCGAATTTGAA	23	1	hsa-miR-10a-5p:1-21(1)	0	0	1.76757	0	0	0.445928	1.56227	4.43545	2.21154	4.4674	0	0	2.6161	2.03477	0.947718	0.203935	0	0	6.72352	0	0	0	0	1.02209	0	0.975464	1.35421	0	1.25143	4.28025	5.04464	2.49885	0	6.77495	3.12268	2.45339	0	9.28245	1.69638	10.0024	0	0	2.78263	0.822064	0.569973
srna29943	TACCCTGTAGATCCGACTTTG	21	1	hsa-miR-10a-5p:1-21(1)	3.33788	5.24155	2.17547	0	2.60948	0.63704	0.426074	0.316818	0.510354	1.31394	0.353358	0.212491	0	0.280658	0	0	0	0	0.108444	0	0	0	0	8.38117	3.88336	5.07241	10.292	7.99016	8.75999	0.118896	0.970123	0.5553	0.9714	0.205302	0.173482	0.817798	2.03259	4.64123	2.75662	4.08262	0.554605	0	0	0.685053	0.664969
srna12684	ATACCCTGTAGATCCGAATTTGT	23	1	hsa-miR-10a-5p:1-22(1)	0	0	1.2237	0	2.60948	3.88594	2.69847	0	2.55177	5.51855	2.47351	8.71213	5.0945	6.38498	1.93334	0.509837	0	0	10.0853	0	0	0	0	6.74582	0	1.36565	0.812525	7.64277	18.3245	0.594479	14.3578	0	0	2.05302	2.42875	0	0	0	0	9.39003	4.62171	4.08878	1.85509	3.28825	9.59455
srna3653	TACCCTGTAGATCCGAATTTGTGG	24	1	hsa-miR-10a-5p:1-22(1)	26.703	51.5419	18.2196	22.1789	20.006	12.7408	13.5634	7.28681	7.82543	26.8044	11.1308	11.8995	13.4247	14.4539	8.98436	4.18066	7.08629	7.35762	10.1937	2.04911	10.0019	11.369	1.30688	20.033	3.88336	8.97427	18.1464	17.7173	31.1069	5.94479	40.5511	19.4355	9.3902	20.3249	57.4225	13.9026	4.06519	59.9492	22.9011	32.4569	20.8901	12.6752	7.88412	18.7705	12.6344
srna98	TACCCTGTAGATCCGAATTTGT	22	1	hsa-miR-10a-5p:1-22(1)	1774.5	1823.19	1643.57	155.252	1620.49	1129.92	1055.53	663.417	1236.76	3218.98	1045.94	800.241	975.735	1052.4	898.588	353.827	3.54315	133.775	602.731	166.661	176.211	273.589	71.0943	1438.49	27.1835	778.42	1366.13	1413.22	2487.93	630.148	3544.34	1224.99	1212.95	807.657	2555.04	1035.33	1040.69	2811.04	785.636	2798.23	1562.88	1656.37	621.918	1570.14	1725.78
srna18995	TACCCTGTAGATCCGAATTTGTT	23	1	hsa-miR-10a-5p:1-22(1)	0.417235	15.7247	2.31144	0	7.17607	3.37631	2.91151	0.950454	5.10354	6.4821	1.41343	1.48744	1.30805	3.15741	2.53988	2.03935	0	0.334437	0.433775	0	0.294174	13.2027	0.261376	5.92814	0	2.34111	1.89589	7.29537	2.23469	1.07006	8.82812	0.83295	1.2952	1.84771	5.89839	0.817798	0	2.70738	0.424095	9.1859	1.29408	3.67991	0.231886	2.74021	6.17471
srna15740	TACCCTGTAGATCCGAATTTGTAA	24	1	hsa-miR-10a-5p:1-22(1)	15.0205	0	7.61415	0	2.39202	3.69483	1.7043	1.26727	0.170118	6.30691	5.30038	0	3.71761	4.98169	1.44053	2.75312	0	0	0	0	0	0.366741	0	0	0	0	0	0	4.29061	0	8.73111	2.49885	3.8856	12.7287	27.2367	11.4492	0	11.6031	0	0	4.80658	0	1.39132	2.46619	2.84987
srna10725	TACCCTGTAGATCCGACTTTGT	22	1	hsa-miR-10a-5p:1-22(1)	15.0205	18.3454	11.8291	0	10.8728	1.33778	0.92316	1.26727	2.04142	3.24105	0.353358	0.637473	0.826135	0.350823	0	0	0	0	0.108444	0	0	0	0	19.4198	0	11.9007	18.9589	18.7595	33.5204	0.237792	2.42531	1.1106	0.9714	0.205302	1.38786	7.36018	6.09778	21.6591	7.20961	18.5759	1.84868	1.83995	1.15943	1.2331	1.61492
srna28801	TACCCTGTCGATCCGAATTTGT	22	1	hsa-miR-10a-5p:1-22(1)	35.8822	30.5757	23.5223	0	24.1377	0.127408	0.0710123	0	0.850591	0.963556	0	0	0	0.140329	0	0	0	0	0	0	0	0	0	0	0	0	0	0	0	0	0.194025	0	0.3238	0	0.520446	18.8094	24.3911	49.8932	13.359	34.7023	0.369737	0	0.463772	0.822064	0.569973
srna5242	TACCCTGTAGATCCGAATTTGTA	23	1	hsa-miR-10a-5p:1-22(1)	13.3515	15.7247	9.10979	0	1.5222	4.26817	10.0127	7.92045	9.3565	25.3152	15.1944	4.88729	14.4574	14.1732	4.39741	3.87476	0	0	2.38577	25.2724	0	3.66741	0	15.127	0	13.8516	9.47946	2.08439	23.4196	4.99362	33.2752	22.7673	11.333	14.7817	53.9529	22.8983	0	32.4886	0	22.4544	7.94934	9.4042	7.65223	11.0979	10.9245
srna32497	TACCCTGTAGCTCCGAATTTGT	22	1	hsa-miR-10a-5p:1-22(1)	2.92065	0	1.2237	0	1.08728	5.60595	5.53896	2.21773	6.29437	14.5409	1.76679	1.69993	1.10151	0.561317	0.0758174	0	0	0	0.216888	0	0	0	0	0	0	0	0.270842	0	0.446938	0	0.291037	0	0	0.205302	0.173482	0	4.06519	3.86769	0.636142	3.06197	7.39474	7.56425	3.94206	7.67259	7.40965
srna46550	TACCCTGTAGAGCCGAATTTGT	22	2	hsa-miR-10a-5p:1-22(1);hsa-miR-10b-5p:1-22(1)	5.00682	1.74718	2.99127	0	5.65387	0.509632	0.639111	0.316818	0.510354	1.75192	1.23675	1.06246	1.30805	0.91214	1.85753	1.01967	0	0	0.867551	0.683038	0	0	0	0.408837	0	0.195093	0.541683	0.347398	1.25143	0.356687	2.23128	1.1106	0	0.410603	0.520446	2.45339	8.13038	8.89569	2.54457	6.94046	0.739474	0.613318	0.695658	0.822064	0.85496
srna14580	TACCCTGTAGATCCGAATTTGTGAA	25	1	hsa-miR-10a-5p:1-23(1)	0	20.0926	0	0	6.5237	1.40149	7.17225	1.58409	5.95413	9.81075	4.77034	0	2.27187	3.08724	2.53988	0.40787	0	0	0	0	0	11.369	6.01165	6.33698	0	5.4626	2.43758	2.08439	8.04488	3.68577	15.1339	3.3318	0	0	20.1239	16.356	0	26.6871	0	3.87849	5.91579	0	0.695658	4.38434	2.75487
srna944	TACCCTGTAGATCCGAATTTGTGA	24	1	hsa-miR-10a-5p:1-23(1)	181.497	249.847	114.62	118.287	107.424	69.6285	78.9657	52.9086	59.7115	153.819	59.0109	68.2096	81.0301	85.9516	38.5532	14.2754	3.54315	32.4404	38.606	12.2947	25.8874	65.28	5.4889	74.204	3.88336	40.7744	90.732	111.862	121.388	21.8768	147.653	77.742	56.0174	100.803	234.548	72.784	10.163	200.733	70.6118	179.635	127.559	89.5444	32.2321	79.7402	65.5469
srna331	TACCCTGTAGATCCGAATTTGTG	23	1	hsa-miR-10a-5p:1-23(1)	519.875	721.587	395.256	184.824	362.718	215.957	219.073	162.211	252.966	602.836	246.114	207.604	188.083	256.031	148.071	55.8781	85.0355	50.5001	171.775	157.099	59.4232	160.999	14.8984	206.463	143.684	197.824	320.406	235.189	443.988	129.359	689.272	281.537	284.62	253.137	710.062	265.784	345.541	751.879	331.218	396.627	412.072	307.477	126.842	344.856	320.8
srna2386	TACCCTGTAGATCCGAATTTGTGT	24	1	hsa-miR-10a-5p:1-23(1)	95.5468	120.556	39.8383	0	13.0474	32.0431	26.1325	5.06909	29.4304	59.2149	17.1379	17.6368	22.9253	18.2428	27.3322	9.17707	0	0.334437	9.10929	0	2.94174	10.2688	0	24.5302	0	8.58408	15.438	4.16878	60.2472	17.121	74.1174	18.3249	24.285	10.2651	48.228	30.2585	0	55.6947	34.5637	72.6707	28.1	32.097	13.4494	20.8256	23.0839
srna20280	ACCCTGTAGATCCGAA	16	1	hsa-miR-10a-5p:2-17(1)	0.417235	8.73592	0.135967	0	0.434913	0.828152	0.710123	8.55408	8.33579	4.4674	0.353358	0.849964	3.02916	1.89444	0.606539	2.34525	0	1.33775	1.08444	0	0	0.733483	0	2.65744	0	7.02334	4.60431	0.694797	7.15101	0.475583	2.81336	7.7742	19.428	0.410603	11.6233	0	28.4563	9.28245	0	0.204131	3.32763	5.7243	3.01452	4.65836	4.55979
srna39089	ACCCTGTAGATCCGAAT	17	1	hsa-miR-10a-5p:2-18(1)	0.83447	0	1.6316	0	1.73965	0.891856	1.63328	0	9.69673	3.85422	0.176679	0	2.89147	0.350823	0.113726	0	0	0	0.867551	0	0.294174	8.43505	0	0.408837	0	0.390186	0.812525	0.694797	2.23469	0	4.36555	0.83295	0.6476	0	0.693928	0	0	0	0	0.204131	0.924342	5.51986	1.6232	9.17971	4.65478
srna16774	ACCCTGTAGATCCGAATT	18	1	hsa-miR-10a-5p:2-19(1)	2.08618	1.74718	0.271934	0	1.08728	2.22964	3.12454	3.16818	13.2692	16.3805	1.76679	0.849964	0.757291	2.10494	1.55426	1.42754	0	0	11.8204	0	0.294174	0.366741	0.522752	5.51931	0	1.36565	2.97926	9.03236	5.54203	0.83227	7.66397	1.1106	11.333	0.205302	5.37794	0.817798	2.03259	0.386769	0.424095	1.02066	4.43684	6.95093	4.40583	23.7028	13.5844
srna6331	ACCCTGTAGATCCGAATTT	19	1	hsa-miR-10a-5p:2-20(1)	20.4445	8.73592	7.61415	0	3.69676	8.91856	9.37363	6.33636	14.46	27.6803	12.0142	4.6748	7.43522	12.2086	4.47323	2.34525	3.54315	3.67881	5.63908	2.04911	1.1767	6.2346	2.61376	16.7623	0	14.4369	6.22936	20.8439	14.302	8.20381	25.8053	8.60715	12.6282	3.28483	11.6233	3.27119	12.1956	16.6311	3.39276	6.94046	12.2013	13.9019	6.95658	27.5391	19.2841
srna1141	ACCCTGTAGATCCGAATTTG	20	1	hsa-miR-10a-5p:2-21(1)	41.3063	84.7384	69.0712	140.466	88.7223	60.901	45.5899	55.76	77.9141	146.986	49.4702	50.5729	38.9661	56.4123	45.1114	18.1502	56.6903	3.00994	54.981	3.41519	5.29514	61.6126	24.8307	64.8007	0	34.1412	82.6067	70.1745	93.5888	39.8301	156.481	71.9113	52.4556	45.3717	101.66	90.7756	105.695	164.377	56.6167	93.9003	86.8882	50.9054	47.3047	111.39	77.7063
srna12377	ACCCTGTAGATCCGAATTTGA	21	1	hsa-miR-10a-5p:2-21(1)	2.92065	39.3116	2.58337	0	6.95861	3.2489	4.68681	2.21773	2.21154	14.5409	1.94347	0.849964	1.37689	2.73642	3.4876	2.24328	0	0	1.19288	0	8.23689	11.369	0.261376	1.63535	0	2.92639	4.87515	13.5485	3.93305	5.11252	4.07452	2.7765	6.7998	0.821207	14.052	0	0	3.48092	13.9951	6.12393	5.17632	6.74649	4.40583	6.16548	1.89991
srna40571	ACCCTGTAGATCCGAATTTGTA	22	1	hsa-miR-10a-5p:2-22(1)	0	0	5.30271	0	0	0.254816	0.710123	0	4.93343	3.41624	0.353358	0	1.10151	2.31543	0.568631	0.101967	0	0	0	0.683038	0	0	0	0	0	0.195093	0.541683	0	1.25143	0.118896	2.71634	0.5553	0	0.410603	9.19455	4.08899	0	3.09415	0.212047	0.204131	3.5125	0.613318	0	0.411032	0.189991
srna534	ACCCTGTAGATCCGAATTTGT	21	1	hsa-miR-10a-5p:2-22(1)	308.754	319.735	191.442	22.1789	187.23	180.346	140.249	95.0454	175.052	377.013	157.951	99.8708	102.716	147.065	117.024	40.4811	3.54315	22.4073	90.2253	37.5671	79.7213	75.9155	18.5577	177.64	3.88336	79.2077	140.296	238.663	290.331	93.3332	448.682	188.802	135.348	117.433	261.611	200.36	294.726	483.848	136.559	341.511	216.851	164.574	82.5514	234.699	270.452
srna2611	ACCCTGTAGATCCGAATTTGTGG	23	1	hsa-miR-10a-5p:2-22(1)	26.703	61.1514	23.9302	29.5718	30.2265	17.1364	12.8532	11.4054	15.821	37.0531	17.1379	18.4867	15.8343	24.2068	18.7648	6.93378	21.2589	3.67881	21.5803	2.73215	3.23592	28.6058	3.39789	19.0109	11.6501	11.3154	36.5636	23.6231	42.9061	19.4989	62.767	33.8733	47.9224	18.8877	71.8216	29.4407	2.03259	58.0153	26.2939	39.1932	22.1842	16.3551	10.6668	23.7028	16.2442
srna9926	ACCCTGTAGATCCGAATTTGTGAA	24	1	hsa-miR-10a-5p:2-23(1)	0	27.0814	7.20625	0	13.0474	8.34522	9.30262	4.11863	1.70118	12.5262	5.65374	4.24982	3.2357	3.50823	0.8719	1.52951	0	1.33775	0	0	0	15.0364	0	2.24861	0	6.43806	6.22936	1.73699	7.86611	0.951166	11.8355	20.8237	3.8856	12.5234	13.1846	0	22.3585	25.9135	12.2988	26.9453	8.68882	7.76869	1.39132	5.48042	6.4597
srna538	ACCCTGTAGATCCGAATTTGTG	22	1	hsa-miR-10a-5p:2-23(1)	299.992	525.029	207.35	251.36	169.399	134.161	133.503	108.669	148.173	323.667	131.449	64.5973	120.065	180.393	105.879	44.5598	88.5787	40.8014	144.556	35.518	8.53106	137.161	9.93229	127.966	19.4168	87.9869	215.319	97.619	244.922	99.1591	404.541	194.355	180.033	190.725	372.466	112.038	266.27	294.718	250.428	273.127	230.531	162.938	99.0153	211.407	162.252
srna2808	ACCCTGTAGATCCGAATTTGTGT	23	1	hsa-miR-10a-5p:2-23(1)	63.4197	103.957	26.9215	0	17.8314	26.5009	18.9603	9.50454	20.5843	51.2437	6.53713	15.5118	21.4795	25.1189	33.8525	7.95346	0	11.0364	21.0381	0	1.1767	0	0	12.674	0	7.80371	1.62505	12.1589	39.3305	7.84712	41.9093	26.6544	33.6752	26.4839	45.7993	0.817798	0	24.3664	45.3782	36.3353	27.7303	10.222	11.8262	24.3879	26.9787
srna731	ACCCTGTAGATCCGAATTTGTGA	23	1	hsa-miR-10a-5p:2-23(1)	189.425	522.408	168.191	325.29	133.083	87.7841	81.0251	71.6009	76.8934	177.645	114.135	75.6468	90.5307	130.085	53.3376	21.2092	60.2335	21.0696	80.8991	28.6876	14.1204	124.325	32.1493	63.3698	58.2504	53.8456	146.525	98.3138	174.663	84.6538	233.509	158.538	212.737	117.227	249.641	129.212	30.4889	315.603	158.187	241.691	127.744	107.535	39.4206	96.8665	81.3162
srna27881	CCCTGTAGATCCGAATTT	18	1	hsa-miR-10a-5p:3-20(1)	4.17235	1.74718	2.85531	0	1.95711	1.46519	1.91733	0.950454	3.06213	4.3798	1.76679	1.91242	1.44574	2.66625	0.947718	0.917707	0	0	0.867551	1.36608	0	2.20045	1.0455	2.45302	0	1.95093	1.89589	2.43179	3.48612	0.594479	5.04464	2.2212	1.619	1.64241	3.29616	0	0	8.12215	2.33252	3.87849	3.69737	4.08878	1.39132	4.79537	2.46988
srna8024	CCCTGTAGATCCGAATTTG	19	1	hsa-miR-10a-5p:3-21(1)	12.5171	12.2303	11.8291	7.39295	13.6998	6.05188	6.74617	7.28681	10.5473	16.6432	4.41698	6.79971	4.40606	7.57778	6.17912	4.0787	3.54315	1.00331	6.72352	0	1.76505	6.60135	1.56826	7.97233	3.88336	4.87732	11.3754	9.72716	10.7265	4.04246	17.5592	8.3295	9.3902	5.33784	12.1437	8.17798	10.163	25.9135	10.8144	16.1264	8.13421	8.38201	4.40583	13.427	9.87953
srna43485	CCCTGTAGATCCGAATTTGTGG	22	1	hsa-miR-10a-5p:3-22(1)	1.66894	9.60951	1.49564	14.7859	2.39202	1.08297	0.284049	0.316818	1.02071	1.48913	1.06008	0.637473	0.757291	1.26296	1.44053	0.509837	3.54315	0.334437	0.759107	0	0	1.83371	0	0.613256	0	1.17056	4.87515	0.347398	2.1453	0.83227	1.64921	1.1106	2.9142	0.410603	3.12268	0.817798	2.03259	5.41477	1.69638	2.04131	0.924342	0.613318	0	0.548042	1.04495
srna23850	TCCCCTGTAGATCCGAATTTGT	22	1	hsa-miR-10a-5p:3-22(1)	37.5512	31.4493	33.9917	0	29.7915	0.127408	0	0	0	0.175192	0	0	0	0.140329	0.0379087	0	0	0	0.108444	0	0	0	0	0.204419	0	0	0	0	0	0	0.0970123	0	0	0	0	26.1695	26.4237	56.855	16.7517	52.4617	0.184868	0	0	0	0
srna3656	CCCTGTAGATCCGAATTTGT	20	1	hsa-miR-10a-5p:3-22(1)	49.2337	66.393	40.7901	14.7859	42.404	17.0727	16.3328	12.6727	23.6464	41.6957	19.4347	11.8995	9.77593	13.0506	11.9412	6.72985	0	0.668875	9.10929	3.41519	5.00097	5.13438	1.0455	16.7623	0	7.41353	21.1257	17.3699	28.9616	7.96602	38.0288	25.2661	11.6568	8.41737	29.8389	32.7119	30.4889	80.0612	21.8409	89.8177	22.1842	18.3995	8.81166	21.3737	23.7489
srna39032	CCCTGTAGATCCGAATTTGTGT	22	1	hsa-miR-10a-5p:3-23(1)	4.17235	6.11514	3.12724	0	0.65237	1.01926	1.06519	0.316818	1.19083	2.62788	0.530038	1.27495	0.757291	1.68395	1.17517	0.40787	0	0.668875	1.30133	0	0	0	0.261376	0.817675	0	0.390186	0.270842	0.347398	2.05591	0.237792	1.64921	1.1106	2.5904	1.02651	2.08178	0	0	2.70738	2.96866	11.4313	1.47895	0.408878	0.463772	2.6032	0.664969
srna6044	CCCTGTAGATCCGAATTTGTG	21	1	hsa-miR-10a-5p:3-23(1)	27.5375	48.9212	20.9389	22.1789	15.222	7.83559	8.52148	8.55408	9.3565	21.6362	10.2474	7.0122	8.39904	12.6998	6.33076	2.65115	7.08629	1.00331	9.21773	2.04911	0	9.16853	2.09101	7.35907	0	5.26751	14.0838	8.33756	15.4641	3.68577	19.9845	11.6613	11.6568	5.74845	15.9603	13.9026	24.3911	38.2901	22.265	28.7825	13.4954	11.0397	6.72469	10.9608	10.1645
srna11991	CCCTGTAGATCCGAATTTGTGA	22	1	hsa-miR-10a-5p:3-23(1)	10.8481	24.4606	11.0133	29.5718	7.82844	4.39558	2.55644	4.11863	3.06213	7.18287	4.77034	4.6748	3.92414	6.17448	2.65361	0.203935	0	2.00662	2.38577	0	0.588349	5.86786	1.56826	1.83977	3.88336	1.36565	11.1045	5.90577	7.68733	2.02123	5.14165	6.38595	14.2472	3.28483	12.8377	13.9026	2.03259	23.9797	6.57347	16.7388	6.4704	4.49766	1.85509	3.97331	3.60983
srna41075	AACCTGTAGATCCGAATTTG	20	1	hsa-miR-10a-5p:4-21(1)	2.50341	3.49437	3.39917	0	5.43641	1.08297	0.639111	0.950454	0.680472	3.06586	3.35691	2.3374	3.16685	3.85905	0.0379087	0	0	0	2.16888	0	0.882523	1.46697	0.784128	0	0	0	0.270842	0.694797	0.536326	0	0.0970123	0	0	0	0.173482	7.36018	4.06519	7.34861	3.60481	4.49089	1.47895	1.83995	0.231886	2.05516	1.89991
srna16101	CCTGTAGATCCGAATTTG	18	1	hsa-miR-10a-5p:4-21(1)	10.0136	17.4718	8.70189	0	9.78554	2.03853	3.26657	2.21773	3.40236	6.4821	2.47351	2.54989	1.78996	3.15741	2.95688	1.83541	7.08629	0.668875	2.16888	0	0.882523	3.66741	0.261376	4.49721	0	2.34111	5.41683	4.51618	4.73754	2.25902	7.56696	2.2212	3.8856	1.64241	5.55142	6.54238	10.163	27.4606	7.20961	13.8809	2.58816	4.7021	1.15943	4.11032	2.56488
srna7294	CCTGTAGATCCGAATTTGT	19	1	hsa-miR-10a-5p:4-22(1)	47.1476	48.0476	35.7593	0	37.62	5.92447	4.6158	5.06909	8.33579	14.3657	6.00709	2.97487	4.33721	5.7535	5.45885	3.56886	3.54315	0.334437	2.60265	1.36608	0.588349	1.83371	0.261376	6.74582	3.88336	3.90186	10.8337	6.94797	13.0506	3.68577	13.6787	3.8871	3.8856	2.87422	11.7968	25.3517	24.3911	73.0993	18.8722	67.1592	7.94934	6.54206	1.85509	9.59074	9.49955
srna15180	AACCTGTAGATCCGAATTTGT	21	1	hsa-miR-10a-5p:4-22(1)	20.0273	21.8398	16.1801	7.39295	16.5267	3.1852	2.84049	1.90091	3.06213	9.63556	9.364	3.61235	8.88095	7.85843	0.0758174	0	0	0	2.92798	1.36608	0.882523	2.56719	0.522752	0.817675	0	0.780371	0.812525	0.694797	1.25143	0	0.0970123	0	0	0	0	7.36018	12.1956	20.8855	10.1783	30.2114	4.25197	5.51986	1.6232	5.89146	5.41474
srna17222	TAACCTGTAGATCCGAATTTGT	22	1	hsa-miR-10a-5p:4-22(1)	27.9548	20.0926	19.5792	7.39295	17.3965	2.80298	2.27239	0.950454	2.72189	7.88364	6.53713	5.31228	6.88446	6.52531	0.0758174	0	0	0	1.62666	0	0.588349	0.366741	0	0.613256	0	0.780371	0.270842	0.694797	1.34081	0	0.0970123	0	0	0	0.173482	5.72459	2.03259	29.7812	6.78552	30.0073	5.54605	3.88435	1.6232	3.15124	4.46479
srna45997	CCTGTAGATCCGAATTTGTGA	21	1	hsa-miR-10a-5p:4-23(1)	8.76194	13.1039	6.79835	14.7859	5.65387	0.254816	0.994173	0	0.680472	1.05115	0	0.424982	0.688446	0.841975	0.30327	0.305902	0	0.334437	0.542219	0	0	2.56719	0	0.817675	0	0.195093	1.62505	1.38959	1.51959	0.118896	1.06714	1.6659	0.6476	1.43711	2.94919	7.36018	4.06519	7.73538	3.18071	8.16525	0.369737	0.204439	0.695658	0.685053	0.569973
srna18373	CCTGTAGATCCGAATTTGTG	20	1	hsa-miR-10a-5p:4-23(1)	24.1996	17.4718	17.1318	7.39295	11.0903	2.03853	1.63328	0.950454	2.38165	4.64259	2.29683	1.27495	1.37689	3.01708	1.63007	0.713772	0	0.334437	1.95199	0.683038	0.882523	1.46697	0	2.65744	0	1.75584	3.79178	1.0422	5.36326	0.713375	5.33568	2.2212	3.5618	1.43711	6.41883	10.6314	14.2282	21.6591	11.0265	16.9429	2.77303	1.83995	0.927544	3.42527	1.99491
srna25463	TACTCTGTAGATCCGAATTTG	21	1	hsa-miR-10a-5p:5-21(1)	1.66894	0	0.679835	0	2.60948	2.29334	1.49126	1.26727	2.21154	4.11701	7.24385	5.52477	7.02215	7.22695	0.0379087	0	0	0	4.01242	0.683038	0.588349	1.10022	1.0455	1.63535	0	1.56074	1.08337	1.73699	3.12857	0	0	0	0	0	0.346964	1.6356	0	3.48092	0.84819	1.02066	3.14276	4.08878	0.927544	2.19217	2.94486
srna13592	CTGTAGATCCGAATTTG	17	1	hsa-miR-10a-5p:5-21(1)	29.6237	28.8285	25.6978	14.7859	25.0075	2.35705	1.49126	1.26727	2.72189	4.90538	1.76679	2.97487	1.99649	3.15741	2.19871	0.815739	3.54315	0.334437	3.14487	1.36608	2.05922	4.4009	1.0455	3.67954	0	2.34111	3.52094	3.47398	3.5755	1.78344	4.36555	2.2212	1.9428	2.05302	3.12268	21.2627	14.2282	53.7609	21.8409	29.8032	2.58816	4.90654	0.927544	4.65836	3.03986
srna9714	TACTCTGTAGATCCGAATTTGT	22	1	hsa-miR-10a-5p:5-22(1)	6.67576	6.11514	5.30271	0	6.74115	5.28743	4.33175	3.485	6.97484	13.7526	20.6715	12.3245	18.4504	18.4533	0.0379087	0.101967	0	0	4.55464	3.41519	1.1767	1.83371	0.522752	6.5414	0	1.56074	3.52094	7.29537	8.13427	0.237792	0.388049	0	0.3238	0.205302	0.346964	5.72459	0	9.66922	3.18071	7.34872	5.54605	11.4486	1.6232	7.53558	8.26461
srna4972	CTGTAGATCCGAATTTGT	18	1	hsa-miR-10a-5p:5-22(1)	121.833	109.199	103.199	7.39295	103.944	4.96891	2.76948	2.21773	4.93343	12.1758	7.24385	5.31228	5.7141	6.45514	3.29806	1.22361	0	0.334437	6.28974	2.04911	1.47087	5.13438	0.522752	5.72372	0	2.7313	5.14599	7.29537	10.1902	2.49681	11.7385	3.60945	4.857	2.87422	7.11276	69.5128	91.4668	181.395	55.5564	160.447	7.39474	4.49766	2.08697	5.06939	5.88972
srna35054	ACTCTGTAGATCCGAATTTGT	21	1	hsa-miR-10a-5p:5-22(1)	0.83447	0.873592	1.6316	0	2.82694	1.78371	1.49126	0.316818	2.04142	4.11701	6.36045	2.54989	4.61259	5.05185	0	0	0	0	1.7351	0	0.294174	0.366741	0	2.04419	0	1.36565	0.541683	1.38959	1.87714	0	0.194025	0	0	0	0.173482	0.817798	0	3.48092	0.84819	2.04131	1.66382	1.63551	0.927544	1.09608	2.84987
srna39997	TACTCTGTAGATCCGAATTTGTG	23	1	hsa-miR-10a-5p:5-23(1)	2.08618	1.74718	0.543868	0	0.65237	1.40149	0.92316	0.316818	1.70118	2.54028	4.2403	4.03733	3.37339	5.96399	0	0	0	0	2.38577	2.73215	0	0.733483	0.261376	0.613256	0	0.975464	1.08337	0.347398	2.05591	0.118896	0.0970123	0	0	0	0	0.817798	2.03259	1.93384	0.424095	1.42892	1.10921	2.45327	0	1.64413	1.42493
srna29555	CTGTAGATCCGAATTTGTGA	20	1	hsa-miR-10a-5p:5-23(1)	16.6894	39.3116	15.0923	14.7859	12.1776	0.573336	0.852148	0.316818	0.680472	1.48913	1.23675	0.424982	0.688446	1.68395	0.265361	0.101967	0	0	1.40977	0	0	1.46697	0.261376	0.613256	0	0.195093	1.62505	0.347398	1.25143	0.475583	0.970123	1.6659	1.2952	0.410603	2.25527	14.7204	4.06519	23.9797	9.96623	18.9842	1.10921	0.613318	0.231886	0.959074	0.664969
srna13641	CTGTAGATCCGAATTTGTG	19	1	hsa-miR-10a-5p:5-23(1)	39.6373	72.5081	38.7506	14.7859	27.1821	1.33778	1.1362	2.21773	1.53106	2.97826	1.76679	1.91242	2.13418	2.10494	1.17517	0.305902	0	1.33775	2.92798	2.04911	0.588349	1.10022	0	1.43093	3.88336	0.585278	1.35421	1.73699	3.75428	1.07006	4.07452	1.1106	1.619	1.84771	3.8166	19.6271	26.4237	56.855	29.4746	37.9684	1.84868	3.06659	2.08697	1.37011	1.89991
srna20448	TGTAGATCCGAATTTG	16	1	hsa-miR-10a-5p:6-21(1)	16.2722	27.0814	24.2021	0	23.4853	0.764448	0.781136	0.316818	0.850591	2.01471	1.06008	2.97487	1.8588	2.1751	1.13726	0.203935	0	0.334437	2.38577	0	1.1767	1.10022	0.522752	0.204419	0	0.390186	1.62505	1.0422	1.96653	0.594479	1.16415	0.83295	0.6476	1.23181	0.693928	18.8094	18.2934	43.3181	18.2361	28.9866	1.47895	1.43107	0.927544	1.09608	0.664969
srna6907	TGTAGATCCGAATTTGT	17	1	hsa-miR-10a-5p:6-22(1)	98.8847	101.337	91.0979	0	88.2874	2.67557	2.05936	0.950454	2.89201	5.69374	4.59366	4.03733	3.51108	4.49053	2.08498	0.611804	0	0.334437	4.4462	0.683038	1.1767	1.46697	0.784128	2.65744	0	1.17056	3.52094	1.0422	4.82693	0.951166	3.10439	1.38825	0.9714	1.02651	2.42875	61.3348	69.1082	157.802	44.3179	145.954	3.69737	1.83995	1.15943	2.46619	3.89482
srna20932	TGTAGATCCGAATTTGTG	18	1	hsa-miR-10a-5p:6-23(1)	29.6237	48.0476	26.7855	29.5718	25.6599	0.828152	1.06519	0.316818	1.19083	1.31394	1.76679	1.27495	0.826135	1.47346	0.492813	0.101967	3.54315	0	1.62666	1.36608	0.588349	1.83371	0	0.204419	0	0.195093	1.35421	0.347398	1.4302	0.237792	0.485062	0.83295	0	0.410603	1.73482	21.2627	30.4889	44.4784	24.8095	26.5371	0.739474	0.613318	0.231886	0.548042	1.32994
srna40229	GTAGATCCGAATTTG	15	1	hsa-miR-10a-5p:7-21(1)	15.0205	9.60951	11.4212	14.7859	10.8728	0.445928	0.426074	0.316818	0.510354	2.01471	0.353358	0.424982	0.619602	0.91214	0.227452	0.101967	0	0	1.62666	0	0.294174	1.83371	0.261376	0.817675	3.88336	0.585278	1.35421	1.0422	0.446938	0.118896	0.582074	0	0	0.205302	0.173482	8.99578	4.06519	20.8855	9.54213	13.8809	0.924342	1.22664	0.463772	0.685053	0.949955
srna14655	GTAGATCCGAATTTGT	16	1	hsa-miR-10a-5p:7-22(1)	51.3199	41.9324	37.7988	22.1789	40.2295	1.33778	1.1362	0	0.510354	3.50384	1.41343	0.637473	0.89498	1.47346	0.492813	0.101967	0	0.668875	1.51821	0	0.294174	1.10022	0.522752	0.613256	0	0.975464	0.812525	0.347398	1.34081	0.475583	0.970123	0.5553	0.6476	0.410603	0.693928	29.4407	38.6193	75.8067	20.9927	70.017	1.84868	1.43107	0.927544	2.05516	2.65987
srna32755	GTAGATCCGAATTTGTG	17	1	hsa-miR-10a-5p:7-23(1)	21.6962	31.4493	16.9959	22.1789	14.5696	0.382224	0.284049	0.316818	0.510354	1.05115	0.353358	0.637473	0.619602	0.491152	0.265361	0	0	0	1.7351	0.683038	0	1.10022	0.261376	0	0	0.195093	0.270842	0.347398	0.804488	0.237792	0.194025	0	0	0	0.173482	8.17798	20.3259	27.4606	16.9638	18.1677	1.47895	0.613318	0	0.274021	0.474978
srna38461	TAGATCCGAATTTGT	15	1	hsa-miR-10a-5p:8-22(1)	16.6894	17.4718	12.6449	7.39295	11.7427	0.509632	0.284049	0	0.340236	0.525576	0.176679	0.637473	0.206534	0.631481	0.227452	1.22361	0	0	0.867551	0	0.882523	0	0.261376	0.613256	0	0.390186	0.812525	0	0.446938	0.118896	0.388049	0	0	0	0.346964	8.99578	18.2934	29.0077	5.72528	24.4957	0.924342	0.817757	0.231886	0.822064	0.664969
srna39538	CAGATTCGATTCTAGGGGAAT	21	1	hsa-miR-10b-3p:2-22(1)	5.42406	0	3.39917	0	0.217457	2.29334	3.33758	0.633636	0	0	0	0	0	2.45576	0	0.815739	0	0	0.759107	4.09823	0	0	0	2.45302	0	0	0	0	1.60898	0	1.94025	0	0	0	0	0	0	0.386769	7.63371	0	5.17632	0.204439	1.6232	2.05516	2.27989
srna40425	AGATTCGATTCTAGGGGAAT	20	1	hsa-miR-10b-3p:3-22(1)	0	0	0	0	0	1.5926	0.92316	2.21773	0	0	2.29683	0.212491	0	3.57839	0	0	0	0	2.06043	0.683038	0	11.7357	10.7164	5.92814	0	2.7313	0	0	0	1.54565	1.84323	6.6636	0	1.64241	0	0	24.3911	3.48092	5.51323	0	0.739474	1.43107	1.85509	2.05516	1.70992
srna34121	TACCCTGTAGAACCGA	16	1	hsa-miR-10b-5p:1-16(1)	1.25171	0	0.951769	0	4.13167	0.95556	0.497086	1.26727	4.59319	5.69374	1.23675	0.424982	1.30805	1.96461	0.0379087	0.713772	0	0	0.650663	4.09823	0	0.366741	0.261376	1.83977	0	1.17056	1.35421	1.73699	4.29061	1.07006	5.33568	3.05415	0.3238	0.410603	1.73482	1.6356	0	3.09415	1.69638	2.04131	0.739474	1.83995	0.927544	4.52135	5.03476
srna8422	TACCCTGTAGAACCGAA	17	1	hsa-miR-10b-5p:1-17(1)	1.25171	0	0.543868	7.39295	12.6125	3.63113	2.05936	4.43545	24.3269	25.4904	10.2474	4.88729	6.47139	3.29774	0.985627	1.63148	0	0	12.5795	0	0	0.733483	4.44339	4.08837	0	2.34111	6.5002	3.82138	4.91632	10.5817	14.4548	17.2143	6.7998	5.74845	11.1028	0	0	8.50892	2.96866	6.5322	10.5375	16.3551	4.8696	40.2811	40.8481
srna31267	TACCCTGTAGAACCGAAA	18	1	hsa-miR-10b-5p:1-17(1)	0	0	4.07901	0	0	1.91112	0.213037	1.90091	4.59319	6.5697	6.71381	6.58722	0.0688446	0.561317	0.492813	0.101967	0	0	0.216888	0	0	0.733483	3.65926	0.613256	0	0.195093	1.35421	0	3.12857	9.27387	3.00738	1.94355	0	0.410603	0.173482	0	0	0	0.212047	3.87849	4.25197	3.88435	2.08697	4.38434	3.70483
srna45793	TACCCTGTAGAACCGAATA	19	1	hsa-miR-10b-5p:1-18(1)	0	0	0.679835	0	2.82694	0.828152	0.781136	0.316818	1.70118	3.85422	1.06008	0	0.413068	1.68395	0.0379087	0.40787	0	0	0.216888	0	0	1.83371	0.261376	0.204419	0	0	3.52094	3.47398	0.178775	0.951166	6.3058	2.7765	0	0.615905	0.693928	0	0	0.386769	0.84819	0	2.03355	2.04439	0	1.37011	1.04495
srna6932	TACCCTGTAGAACCGAAT	18	1	hsa-miR-10b-5p:1-18(1)	0	0	5.43868	0	12.8299	4.14076	3.97669	2.53454	26.5384	55.9738	1.76679	1.48744	13.6312	2.3856	1.25099	1.73345	0	1.67219	0.650663	0.683038	0.294174	1.46697	2.09101	8.58559	0	3.31658	2.70842	1.0422	10.5477	2.49681	45.3047	11.106	1.9428	2.87422	9.54151	0	0	10.4428	5.30119	3.47023	11.0921	10.4264	1.15943	45.6245	60.3222
srna12323	TACCCTGTAGAACCGAATTA	20	1	hsa-miR-10b-5p:1-19(1)	6.67576	0	0.815802	0	1.08728	3.56742	3.90568	0.316818	7.31508	22.0742	1.23675	0	1.92765	4.70103	0.0758174	1.63148	0	0	0.759107	0	0	9.90202	0	7.56349	0	14.2418	19.2298	25.7075	8.75999	3.56687	11.1564	5.83065	8.7426	0.410603	10.7559	0	0	3.86769	0	0	1.29408	1.0222	4.17395	2.46619	3.13485
srna30980	TACCCTGTAGAACCGAATTAA	21	1	hsa-miR-10b-5p:1-19(1)	0	0	0	0	4.34913	1.01926	0.568099	0	0	6.5697	1.06008	2.3374	1.78996	3.43806	0.720266	0.40787	0	0	0	0	0	0	0	2.45302	0	3.90186	0.812525	0.347398	0.446938	0	6.01476	3.05415	7.4474	3.28483	3.29616	0	0	0	0.636142	0	3.5125	0.204439	0.463772	1.09608	1.04495
srna2719	TACCCTGTAGAACCGAATT	19	1	hsa-miR-10b-5p:1-19(1)	14.6032	26.2078	29.3689	0	21.0933	10.6386	12.6402	19.3259	87.7809	133.234	19.6114	15.9368	19.3453	11.9981	3.75296	3.56886	0	0.668875	5.09686	0.683038	4.41262	4.76764	0.261376	15.7402	0	12.681	14.6255	16.6751	28.1571	23.1847	88.2812	14.4378	5.5046	15.3976	25.6753	21.2627	32.5215	28.6209	19.7204	10.6148	19.7809	39.2523	3.71017	115.363	101.075
srna832	TACCCTGTAGAACCGAATTT	20	1	hsa-miR-10b-5p:1-20(1)	18.7756	100.463	74.102	14.7859	127.212	49.2432	37.5655	50.3741	141.198	464.697	96.6435	44.1981	70.7723	68.621	16.0354	15.9069	3.54315	4.01325	37.5216	8.19645	9.11941	33.7402	1.30688	73.1819	3.88336	69.0629	92.357	140.002	98.5051	73.7154	496.703	96.8998	54.0746	46.1929	94.7212	47.4323	26.4237	182.555	58.9492	70.2211	76.3507	87.7044	29.4495	396.783	269.027
srna21506	TACCCTGTAGAACCGAATTTA	21	1	hsa-miR-10b-5p:1-20(1)	0	0	0	0	10.8728	0.127408	0.355062	5.70272	5.44378	5.69374	0.176679	1.69993	4.19952	1.82428	1.81962	0.713772	0	0	0.216888	0	0	0	0	0.613256	0	2.7313	0	1.38959	1.34081	1.54565	8.82812	13.8825	15.2186	0	6.93928	0	0	2.70738	0	0	0.739474	4.29322	0.231886	5.48042	1.04495
srna14965	TACCCTGTAGAACCGAATTTGAA	23	1	hsa-miR-10b-5p:1-21(1)	5.00682	0	4.07901	0	4.78404	1.14667	2.34341	0.316818	1.8713	19.1835	4.41698	0	7.77944	2.1751	1.47844	0.101967	0	0	0	0	0	0	0	0	0	3.31658	0	0.347398	5.00571	4.16135	8.05202	1.38825	0	8.82797	8.32714	0	0	32.1018	33.5035	8.57351	5.91579	2.04439	3.01452	5.06939	4.55979
srna739	TACCCTGTAGAACCGAATTTGA	22	1	hsa-miR-10b-5p:1-21(1)	251.593	556.478	176.757	0	181.141	58.2892	65.0473	70.6504	122.655	307.812	79.5057	92.4336	83.2331	98.4409	27.5975	30.7942	0	7.69206	77.5374	70.3529	35.8893	74.8152	9.40954	50.287	0	75.3058	80.9817	86.5022	109.679	40.9001	260.284	188.247	170.966	87.6638	219.281	175.827	205.292	512.856	188.298	452.559	102.232	97.722	55.1888	160.85	132.709
srna24257	TACCCTGTAGAACCGACTTTG	21	1	hsa-miR-10b-5p:1-21(1)	3.33788	6.11514	5.43868	7.39295	6.30624	0.700744	0.497086	0	1.02071	3.32865	0	0.212491	0.206534	0.350823	0	0	0	0	0.108444	0	0	0	0	5.11047	0	6.43806	8.93778	10.0746	11.0841	0.594479	2.81336	0.5553	0.6476	0.615905	0.86741	1.6356	14.2282	13.1501	5.72528	6.5322	1.10921	0	0.231886	1.64413	1.32994
srna10335	TACCCTGTAGAACCGAATTTGG	22	1	hsa-miR-10b-5p:1-21(1)	6.25853	15.7247	4.62288	0	10.4379	2.73927	2.20138	0.950454	7.14496	17.782	1.41343	3.61235	2.34072	3.64856	1.47844	1.32558	0	0.334437	5.53064	1.36608	0.882523	1.10022	0.261376	5.31489	7.76672	3.90186	3.52094	7.64277	8.31305	1.90233	33.9543	7.49655	3.5618	4.51664	10.2354	2.45339	12.1956	20.4988	3.81685	14.4933	7.025	2.04439	3.01452	9.45373	9.78454
srna178	TACCCTGTAGAACCGAATTTG	21	1	hsa-miR-10b-5p:1-21(1)	400.963	490.085	429.928	170.038	614.75	355.596	346.824	309.848	907.07	2441.56	372.263	264.764	355.101	389.905	207.588	177.525	17.7157	24.0795	578.223	127.045	158.266	405.249	18.0349	680.101	77.6672	450.079	712.585	806.659	847.931	353.239	2201.31	1002.32	564.383	399.106	1085.3	306.674	853.69	1247.72	458.871	689.963	533.161	508.236	223.538	1573.02	1311.51
srna5593	TACCCTGTAGAACCGAATTTGTGG	24	1	hsa-miR-10b-5p:1-22(1)	18.3583	66.393	9.65366	7.39295	22.6155	3.56742	3.83467	3.485	8.33579	28.9067	5.47706	4.6748	6.12717	8.41975	3.07061	1.73345	7.08629	0	4.33775	0	0	4.4009	0	7.56349	0	6.63316	11.3754	7.99016	15.1065	6.18258	50.1554	12.2166	3.5618	9.85448	33.3085	39.2543	28.4563	47.5726	19.2963	30.0073	5.17632	6.54206	4.8696	18.6334	13.2994
srna5712	TACCCTGTAGAACCGACTTTGT	22	1	hsa-miR-10b-5p:1-22(1)	32.9616	63.7722	34.2637	7.39295	55.8863	1.5289	1.42025	0.950454	1.8713	8.32162	0	0.849964	0.413068	0.631481	0	0	0	0	0.325332	0	0	0	0	27.8009	0	21.07	28.4384	30.9185	43.353	0.83227	8.73111	1.94355	0.3238	0.821207	2.42875	23.7161	56.9127	88.9569	25.2336	88.3888	1.29408	2.04439	1.15943	3.01423	4.93977
srna40133	TACCGTGTAGAACCGAATTTGT	22	1	hsa-miR-10b-5p:1-22(1)	8.76194	10.4831	9.38172	7.39295	12.6125	0.445928	0.497086	0.316818	0.680472	1.75192	0.706717	0.212491	0.413068	0.701646	0.113726	0	0	0	2.06043	0	0.588349	0.366741	0	0.204419	0	0.195093	1.35421	0.694797	0.804488	0.118896	0	0	0	0	0	8.99578	12.1956	23.5929	7.63371	20.209	0.739474	0.817757	0.927544	1.09608	1.61492
srna52	TACCCTGTAGAACCGAATTTGT	22	1	hsa-miR-10b-5p:1-22(1)	4809.89	6062.73	4750.01	791.046	6849.66	1182.79	1313.52	1147.2	3067.57	9371.9	1759.73	1457.05	1724.9	2020.6	523.33	310.491	180.7	89.9637	1486.22	262.286	376.838	778.959	107.426	2127.59	135.918	1547.67	2485.24	2629.46	3652.2	1252.45	10147.3	2585.2	1995.58	2127.13	4342.78	3447.02	5652.65	11975.1	3096.95	10300.3	2034.66	1930.72	755.02	4224.04	4914.12
srna12681	TACCCTGTAGAACCGAATTTGTAA	24	1	hsa-miR-10b-5p:1-22(1)	14.186	0	1.6316	0	6.5237	2.29334	4.6158	0	8.33579	15.9425	1.06008	0	1.2392	5.40267	1.02354	0.40787	0	1.00331	0	0	0	0	0	6.95024	0	6.04788	0	1.0422	6.61468	3.92356	23.283	0	0	8.82797	12.6642	26.1695	0	0.386769	12.7228	16.7388	0	2.86215	2.31886	3.69929	5.69973
srna9767	TACCCTGTCGAACCGAATTTGT	22	1	hsa-miR-10b-5p:1-22(1)	112.653	72.5081	65.4001	0	90.4619	0.127408	0.568099	0.316818	0.680472	2.01471	0	0.424982	0.206534	0.350823	0.0379087	0	0	0	0	0	0.294174	0	0	0	0	0	0	0	0.0893876	0.83227	0.679086	0	0	0.205302	0.693928	46.6145	91.4668	167.471	40.5011	132.889	0.739474	1.0222	0.231886	1.09608	1.04495
srna43754	TACCCTGTAGAATCGAATTTGT	22	1	hsa-miR-10b-5p:1-22(1)	0.83447	0	6.11851	0	3.4793	0.445928	0.852148	0	0.340236	3.32865	0.353358	3.18737	0.413068	1.1928	2.38825	0	0	0	0	0	0	0	0	0	0	0	0.270842	0.347398	1.07265	0.118896	3.39543	0.27765	0.9714	1.43711	0.173482	1.6356	0	1.16031	0	3.47023	0.554605	3.06659	2.78263	3.15124	1.51993
srna3078	TACCCTGTAGAACCGAATTTGTA	23	1	hsa-miR-10b-5p:1-22(1)	63.4197	34.0701	38.3427	0	23.2678	5.41484	8.59249	7.92045	13.0991	55.5359	20.8481	14.0244	19.0011	21.4002	4.3595	3.36492	0	0	13.9893	0	3.82427	0	0	6.74582	0	5.26751	11.1045	9.03236	27.7995	12.4841	98.0794	31.6521	11.6568	27.921	46.3197	35.1653	4.06519	28.6209	18.8722	40.0097	10.3526	6.74649	4.40583	24.2509	28.5937
srna21342	TACCCTGTAGAACCAAATTTGT	22	1	hsa-miR-10b-5p:1-22(1)	5.00682	6.98874	6.25448	0	14.1347	0.63704	0.639111	1.90091	2.38165	7.35806	1.41343	1.48744	1.44574	1.47346	0.151635	0.101967	0	0	1.19288	0	0.294174	0.733483	0	4.29279	0	1.17056	2.70842	3.47398	4.82693	1.90233	12.8056	1.38825	2.9142	2.05302	4.51053	0	4.06519	13.9237	4.24095	13.6768	2.40329	2.24883	0.695658	3.15124	3.03986
srna12203	TACCCTGTAGAACCGAATTTGTT	23	1	hsa-miR-10b-5p:1-22(1)	3.33788	6.11514	8.42995	7.39295	10.2205	2.54816	2.05936	7.92045	5.44378	18.6579	2.12015	1.06246	1.99649	3.50823	0.492813	0.40787	0	0	1.7351	0	0.294174	1.83371	0	1.43093	0	3.12149	3.2501	4.86358	9.29631	0.951166	19.3054	3.3318	15.2186	5.13254	8.50062	2.45339	4.06519	13.5369	1.69638	4.28675	5.36118	1.83995	3.47829	7.26156	14.8193
srna15639	TACCCTGTAGCACCGAATTTGT	22	1	hsa-miR-10b-5p:1-22(1)	1.25171	4.36796	4.89481	0	5.65387	6.68892	6.10706	4.43545	18.0325	44.4112	1.23675	1.69993	1.65227	1.96461	0	0	0	0	0.325332	0	0	0.733483	0	0.204419	0	0.195093	0	0	0.35755	0	0.776098	0.5553	0	0	0.173482	1.6356	10.163	9.66922	2.33252	8.57351	11.0921	7.35981	4.40583	20.8256	22.7989
srna4177	TACCCTGTAGAACCGAATTTGTGT	24	1	hsa-miR-10b-5p:1-23(1)	29.2065	63.7722	35.2155	0	54.799	5.09632	8.66351	2.21773	12.2485	52.8204	10.9541	8.49964	8.88095	16.208	1.78171	2.03935	0	2.6755	0	0	0	0	0.261376	10.8342	0	4.87732	8.39609	18.0647	20.2016	6.89595	55.297	17.2143	14.8948	14.3711	32.9616	62.1526	95.532	89.7304	27.7782	71.0376	4.99145	7.15537	1.15943	19.5925	9.40456
srna25489	TACCCTGTAGAACCGAATTTGTGAA	25	1	hsa-miR-10b-5p:1-23(1)	0.83447	67.2666	10.7414	0	1.95711	2.16594	1.49126	0	0.340236	5.08057	0	0	0	0	0.416996	0	0	0	8.02485	0	0	0	0	3.67954	0	0	1.35421	0.347398	2.1453	0	9.02214	0	0	0	5.03098	0	0	13.9237	1.90843	26.1288	0	2.45327	1.39132	1.37011	2.65987
srna338	TACCCTGTAGAACCGAATTTGTG	23	1	hsa-miR-10b-5p:1-23(1)	693.028	1216.04	434.279	465.756	548.208	120.464	129.953	162.211	240.547	826.381	116.962	143.856	138.378	195.9	54.7023	37.422	77.9492	24.7484	84.8031	10.9286	11.4728	148.53	64.5599	188.678	3.88336	173.828	245.653	278.961	356.567	115.21	1088.96	260.436	261.954	290.912	577.175	642.789	241.879	1239.98	519.516	740.18	252.53	203.826	91.1312	435.42	421.875
srna1417	TACCCTGTAGAACCGAATTTGTGA	24	1	hsa-miR-10b-5p:1-23(1)	131.846	290.906	63.2247	59.1436	108.946	20.7038	18.8183	28.5136	40.6582	140.767	40.6362	31.0237	42.959	39.222	11.5622	5.81214	10.6294	0.668875	21.4719	0.683038	0	20.5375	0.261376	30.4584	0	31.605	55.7934	26.7497	67.3089	23.7792	201.689	64.1371	23.9612	57.2792	118.662	128.394	73.1734	160.896	83.7587	153.303	43.0743	23.5105	17.8552	71.5195	59.0872
srna21230	ACCCTGTAGAACCGAA	16	1	hsa-miR-10b-5p:2-17(1)	0	0.873592	0.135967	0	7.82844	0.573336	0.142025	1.90091	19.7337	12.2634	0.176679	2.54989	1.65227	1.05247	0.227452	1.42754	0	0.334437	5.63908	0	0	0	0	0.408837	0	2.53621	2.70842	8.33756	3.30734	0.594479	4.36555	0.27765	0.3238	0.821207	4.68401	0.817798	0	1.54708	4.0289	0.816525	3.32763	3.67991	3.01452	16.4413	12.2544
srna24883	ACCCTGTAGAACCGAAT	17	1	hsa-miR-10b-5p:2-18(1)	0.417235	1.74718	0.407901	0	2.60948	0.191112	0.142025	0.633636	9.86685	12.4386	0	0.212491	1.99649	0.0701646	0.151635	1.22361	38.9746	0	0.325332	0	0	0	0	0.204419	0	3.12149	0	0	0.446938	0.118896	9.41019	0	1.9428	0.410603	1.56134	5.72459	2.03259	0.386769	0.212047	0.816525	1.10921	0.613318	0	27.2651	18.9041
srna10395	ACCCTGTAGAACCGAATT	18	1	hsa-miR-10b-5p:2-19(1)	10.4309	5.24155	0.951769	0	8.04589	2.67557	1.98835	0.950454	33.6834	45.1119	2.65019	1.69993	2.27187	4.06955	0.833992	0.101967	0	0	4.12087	0	0.588349	1.10022	0	11.6519	0	7.21843	0.541683	2.43179	5.18448	4.87473	9.70123	7.49655	0.6476	1.43711	10.7559	1.6356	8.13038	3.86769	6.57347	4.08262	2.21842	1.22664	0.231886	38.363	35.3383
srna5487	ACCCTGTAGAACCGAATTT	19	1	hsa-miR-10b-5p:2-20(1)	4.17235	8.73592	5.03078	7.39295	10.6554	5.41484	10.1548	1.26727	27.2189	51.8568	7.59721	4.24982	8.53673	10.0335	2.69152	1.52951	0	0.668875	4.98842	8.87949	1.76505	5.86786	0	4.70163	0	4.87732	9.47946	22.9283	12.4249	6.42037	46.8569	6.1083	4.5332	9.64918	16.4808	8.99578	10.163	28.2341	7.20961	12.0437	15.5289	10.222	2.78263	44.9395	37.8082
srna7683	ACCCTGTAGAACCGAATTTGA	21	1	hsa-miR-10b-5p:2-21(1)	41.7235	52.4155	11.5572	0	21.0933	3.31261	4.6158	2.85136	8.84614	18.3076	7.06717	1.69993	1.72112	3.64856	1.55426	0.101967	0	2.00662	2.49421	2.04911	0.882523	18.7038	1.30688	1.83977	0	0.975464	10.292	7.99016	5.00571	0.713375	12.2236	21.9343	11.9806	16.6294	11.7968	8.99578	69.1082	35.5827	16.9638	54.503	4.62171	4.29322	7.18846	14.6601	10.0695
srna1514	ACCCTGTAGAACCGAATTTG	20	1	hsa-miR-10b-5p:2-21(1)	30.4582	76.8761	25.8337	0	58.7133	33.4446	28.3339	13.6232	61.923	198.58	28.2687	20.1866	23.1318	31.5741	11.1452	8.56526	0	3.34437	54.8726	2.73215	12.9437	27.5056	8.10266	54.5798	3.88336	44.4812	53.8975	59.0577	66.0574	27.9405	149.69	90.5139	44.6844	32.8483	58.8104	68.695	152.445	114.097	57.2528	73.2831	33.4612	36.3902	19.4784	136.326	108.485
srna29224	ACCCTGTAGAACCGAATTTGTA	22	1	hsa-miR-10b-5p:2-22(1)	13.7688	0.873592	3.53514	0	3.91422	0.382224	0.426074	0.633636	0.510354	6.92008	0.706717	0.424982	0.757291	1.33313	0.151635	0	0	0	0.542219	0	0	0	0	5.51931	0	1.17056	11.6462	2.08439	3.75428	0.594479	10.7684	4.4424	0	1.02651	2.08178	0	0	4.64123	3.60481	1.02066	1.10921	0.204439	0	2.46619	1.42493
srna34715	ACCCTGTAGCACCGAATTTGT	21	1	hsa-miR-10b-5p:2-22(1)	5.00682	6.11514	4.75884	0	6.30624	1.14667	2.27239	0.950454	5.10354	12.4386	0.706717	0.637473	0.206534	0.701646	0	0	0	0	0.108444	0	0	0	0	0	0	0	0	0	0	0.118896	0.776098	0	0.3238	0.205302	0.346964	7.36018	10.163	15.4708	2.96866	18.9842	1.10921	1.83995	0.231886	8.35765	8.5496
srna442	ACCCTGTAGAACCGAATTTGT	21	1	hsa-miR-10b-5p:2-22(1)	307.085	666.551	409.669	288.325	566.039	96.8938	103.465	99.4808	258.409	699.454	128.622	130.682	123.232	158.782	30.1753	17.6404	3.54315	4.34769	121.349	17.0759	35.3009	86.551	18.0349	134.712	38.8336	102.619	173.88	140.696	257.347	87.7451	708.384	165.479	203.67	130.777	286.592	444.064	652.463	1067.48	227.527	1113.33	146.416	106.717	76.0586	341.567	395.276
srna5300	ACCCTGTAGAACCGAATTTGTGG	23	1	hsa-miR-10b-5p:2-22(1)	25.0341	69.0138	17.4038	7.39295	19.5711	4.52298	3.90568	1.90091	10.2071	27.9431	6.89049	4.6748	5.92064	6.31481	1.93334	1.52951	10.6294	1.33775	5.63908	13.6608	2.64757	8.43505	0.261376	5.31489	3.88336	6.43806	15.7088	7.64277	17.6094	7.72823	56.9462	19.9908	7.4474	20.9408	21.1648	26.1695	75.206	68.8449	25.2336	48.175	7.025	2.86215	1.6232	15.0712	13.4894
srna679	ACCCTGTAGAACCGAATTTGTG	22	1	hsa-miR-10b-5p:2-23(1)	265.362	577.444	231.008	36.9648	208.758	48.6062	61.9228	59.5618	94.9259	303.608	60.4243	67.1472	61.134	105.949	27.2564	11.5223	7.08629	3.67881	50.9686	79.2324	1.76505	57.2117	1.56826	80.541	19.4168	73.55	142.734	72.9537	151.691	75.261	451.689	151.042	160.605	206.944	340.719	195.454	333.346	596.011	250.004	392.34	85.779	80.1402	41.9713	216.203	146.103
srna35807	ACCCTGTAGAACCGAATTTGTGAA	24	1	hsa-miR-10b-5p:2-23(1)	29.2065	2.62078	0.135967	0	0.217457	0.063704	1.56227	0	0	2.36509	0	0.212491	4.13068	0	1.02354	0.305902	0	0	0	0	0	0	0	1.02209	0	0	0.270842	0	0.0893876	0	9.79824	0.83295	0	0	0	17.1738	0	13.5369	0	13.2685	2.40329	0	1.85509	4.38434	2.56488
srna2168	ACCCTGTAGAACCGAATTTGTGT	23	1	hsa-miR-10b-5p:2-23(1)	112.653	125.797	89.8742	7.39295	76.1098	10.1926	14.9836	20.2763	23.8165	67.7993	32.8623	6.37473	20.1715	14.7346	2.84315	1.63148	0	0	10.5191	0.683038	0	12.4692	0	24.3258	7.76672	20.6798	22.7507	19.4543	44.962	20.8068	128.929	37.2051	64.1124	47.0141	60.1983	63.7882	0	170.952	77.3973	164.121	22.3691	8.99533	5.10149	40.5551	43.5079
srna1393	ACCCTGTAGAACCGAATTTGTGA	23	1	hsa-miR-10b-5p:2-23(1)	200.69	518.04	103.063	162.645	98.7253	20.9586	18.8893	8.55408	43.21	128.065	28.4454	35.911	26.2986	36.6259	7.12684	3.67083	3.54315	3.00994	32.4247	68.3038	25.0048	34.8404	0	30.8672	0	23.8013	52.5433	42.0352	59.6215	27.346	178.6	74.9655	35.2942	54.4049	85.8736	160.288	219.52	322.565	127.653	281.497	49.5447	15.9463	12.29	74.3968	46.1678
srna20965	CCCTGTAGAACCGAATTT	18	1	hsa-miR-10b-5p:3-20(1)	5.00682	5.24155	4.62288	7.39295	6.95861	1.5289	1.7043	0	5.27366	11.4751	1.94347	1.06246	0.963825	2.24527	0.454905	0.917707	0	0	1.51821	0	0.294174	1.83371	0	1.02209	0	0.975464	2.70842	2.08439	3.5755	1.66454	8.24605	3.3318	3.238	2.05302	3.12268	4.08899	2.03259	14.6972	4.24095	9.1859	4.06711	2.65771	0.463772	7.94662	7.31466
srna7693	CCCTGTAGAACCGAATTTG	19	1	hsa-miR-10b-5p:3-21(1)	20.4445	13.9775	14.6844	0	18.2663	5.35114	5.1839	3.80182	12.929	28.1183	3.71026	4.6748	3.64876	4.5607	2.76734	4.0787	0	0.668875	10.6275	2.04911	2.3534	5.86786	1.56826	4.70163	0	6.24297	9.20862	11.1168	8.13427	4.16135	24.2531	10.273	6.7998	3.07952	10.062	12.267	20.3259	34.4224	14.2072	27.7618	6.28553	6.74649	3.47829	19.7295	17.0042
srna46332	CCCTGTAGAACCGAATTTGA	20	1	hsa-miR-10b-5p:3-21(1)	6.67576	13.9775	3.80708	0	4.78404	0.509632	0.852148	0.950454	1.19083	2.36509	0.530038	0	0.275378	0.701646	0.341178	0.305902	0	0	0.759107	0.683038	0.294174	2.20045	0.261376	0.613256	0	0.585278	0.541683	0.347398	0.625713	0	1.06714	2.2212	1.2952	0.410603	1.38786	4.90679	4.06519	8.89569	4.24095	11.6355	1.47895	1.22664	0.231886	1.78114	1.23494
srna2389	CCCTGTAGAACCGAATTTGT	20	1	hsa-miR-10b-5p:3-22(1)	88.8711	157.247	104.967	22.1789	146.348	10.4475	12.1431	12.9895	33.5133	81.6395	12.8976	12.537	12.2543	14.3136	5.30722	4.3846	0	1.00331	14.8568	2.04911	2.3534	7.70157	1.56826	14.7181	0	12.8761	23.0215	17.0225	25.0285	8.4416	73.5353	19.9908	18.1328	15.3976	29.3185	72.784	144.314	273.059	68.7034	263.125	17.9322	15.9463	5.56526	44.2544	47.6878
srna7523	TCCCCTGTAGAACCGAATTTGT	22	1	hsa-miR-10b-5p:3-22(1)	90.9573	115.314	93.6813	29.5718	135.693	0.063704	0.142025	0	0.340236	0.175192	0	0.212491	0.206534	0.140329	0.0758174	0	0	0	0	0	0	0.366741	0	0	0	0	0	0	0	0.118896	0.485062	0.27765	0	0.205302	0	52.3391	111.793	228.194	61.0697	186.372	0.184868	0.204439	0	0.137011	0.284987
srna8346	CCCTGTAGAACCGAATTTGTG	21	1	hsa-miR-10b-5p:3-23(1)	28.7892	52.4155	20.667	14.7859	24.3551	3.31261	3.26657	2.85136	7.14496	18.6579	4.2403	4.6748	3.51108	6.17448	1.25099	0.611804	3.54315	0.334437	3.25332	1.36608	0.588349	3.30067	0.261376	2.04419	0	3.51167	9.20862	7.29537	8.58121	4.04246	20.1786	6.6636	9.3902	7.39086	12.4907	26.1695	16.2608	66.5243	23.3252	41.0304	7.20987	4.29322	3.2464	12.742	10.2595
srna37376	CCCTGTAGAACCGAATTTGTGT	22	1	hsa-miR-10b-5p:3-23(1)	15.8549	12.2303	5.57465	0	4.78404	0.254816	0.568099	0.316818	0.340236	2.62788	2.29683	0.637473	0.963825	0.420988	0.0379087	0	0	0	0.325332	0	0	0	0	0.613256	0	0.780371	1.08337	2.08439	1.78775	0.83227	4.17153	0.83295	0.6476	1.64241	1.9083	8.99578	2.03259	10.8295	6.14938	15.9222	1.10921	0.408878	0	0.959074	1.51993
srna26336	CCCTGTAGAACCGAATTTGTGA	22	1	hsa-miR-10b-5p:3-23(1)	15.4377	29.7021	5.71061	14.7859	7.39352	0.828152	0.710123	0.633636	2.38165	4.90538	1.59011	2.54989	1.03267	1.61379	0.30327	0.101967	0	0	0.542219	4.09823	0.294174	0.733483	0	0.817675	0	0.585278	1.89589	2.43179	2.50285	1.42675	5.62671	1.94355	1.619	1.02651	3.29616	8.17798	12.1956	16.2443	5.93733	16.1264	1.10921	0.613318	0.231886	2.6032	1.89991
srna40529	CCTGTAGAACCGAATTT	17	1	hsa-miR-10b-5p:4-20(1)	1.25171	6.98874	3.26321	0	6.5237	0.828152	0.497086	0.950454	0.850591	4.3798	1.41343	0.424982	0.89498	0.841975	0.341178	0.203935	0	0.334437	0.650663	0	0.588349	0.366741	0	0.408837	0	0.975464	1.62505	0.347398	1.07265	0.594479	4.46257	1.1106	1.2952	1.23181	1.9083	1.6356	0	11.2163	2.54457	7.34872	0.739474	0.204439	0.927544	3.15124	2.56488
srna32289	TAACCTGTAGAACCGAATTTG	21	1	hsa-miR-10b-5p:4-21(1)	9.59641	8.73592	7.88609	0	7.61098	1.21038	0.92316	0.633636	1.70118	6.30691	1.94347	2.12491	2.68494	4.28004	0	0	0	0	2.49421	0.683038	0	1.10022	0	0	0	0.390186	1.08337	0	0.446938	0.118896	0.0970123	0.27765	0	0	0.173482	2.45339	6.09778	19.3384	5.51323	10.0024	0.739474	1.43107	0.927544	4.52135	2.65987
srna13176	CCTGTAGAACCGAATTTG	18	1	hsa-miR-10b-5p:4-21(1)	13.7688	17.4718	14.4125	0	18.7013	1.84742	2.41442	2.21773	3.91272	14.7161	2.47351	1.06246	1.99649	2.24527	1.59217	1.22361	0	0.668875	4.33775	0.683038	0.882523	3.66741	0.261376	3.47512	3.88336	3.51167	2.70842	2.08439	5.00571	1.42675	14.4548	5.27535	5.5046	2.87422	6.93928	8.17798	24.3911	29.7812	12.7228	22.8627	2.03355	2.04439	1.85509	8.63167	6.93467
srna30751	AACCTGTAGAACCGAATTTG	20	1	hsa-miR-10b-5p:4-21(1)	4.58959	10.4831	5.71061	0	6.95861	1.78371	1.06519	0.316818	2.21154	7.62085	4.59366	1.69993	4.19952	3.92922	0	0	0	0	3.57865	2.04911	1.47087	1.46697	0	0.817675	0	0.780371	1.08337	0	0.715101	0	0	0	0	0	0	5.72459	10.163	15.084	4.87709	8.16525	1.66382	1.63551	0.463772	3.69929	3.41984
srna29889	AGCCTGTAGAACCGAATTTGT	21	1	hsa-miR-10b-5p:4-22(1)	8.3447	8.73592	7.61415	0	11.3077	0.509632	0.355062	0.316818	1.36094	3.67903	2.47351	3.39986	3.2357	3.43806	0	0	0	0	1.95199	2.04911	0.588349	0	0	0.817675	0	0.195093	1.35421	2.77919	2.1453	0	0	0	0	0	0	6.54238	10.163	20.112	5.08914	18.5759	0.924342	0.204439	0	0.822064	2.27989
srna6595	TAACCTGTAGAACCGAATTTGT	22	1	hsa-miR-10b-5p:4-22(1)	52.9889	76.0025	64.0405	7.39295	82.1986	2.93038	3.26657	3.485	9.69673	25.4904	14.311	11.262	12.9428	16.0677	0.0379087	0	0	0	4.01242	0	0.588349	0.366741	0	0.613256	0	0.975464	0.270842	0.694797	1.60898	0	0.0970123	0	0	0.205302	0.173482	49.8857	89.4342	138.463	39.0167	127.378	4.80658	6.95093	2.31886	10.1388	12.9194
srna6450	AACCTGTAGAACCGAATTTGT	21	1	hsa-miR-10b-5p:4-22(1)	45.0614	63.7722	51.3955	7.39295	66.3242	4.26817	3.90568	3.485	10.2071	32.6733	16.0778	15.5118	16.1096	17.7516	0	0	0	0	9.43462	0	0.882523	2.56719	0.522752	1.43093	0	0.975464	1.89589	0.694797	2.41347	0	0.679086	0	0	0	0.173482	30.2585	71.1408	117.965	35.1999	96.7582	8.87369	4.90654	2.08697	13.7011	17.0042
srna3437	CCTGTAGAACCGAATTTGT	19	1	hsa-miR-10b-5p:4-22(1)	110.985	149.384	124.274	36.9648	161.135	4.20446	5.89402	10.455	13.7796	36.8779	7.42053	6.16224	6.19602	7.57778	2.53988	1.83541	7.08629	0	8.56707	2.04911	1.1767	5.13438	0.522752	11.243	11.6501	7.02334	11.6462	12.5063	13.4081	6.65816	35.9916	10.8283	5.8284	6.77495	13.3581	89.14	119.923	278.087	64.4624	228.831	9.24342	6.95093	3.71017	18.7705	18.6191
srna20351	CCTGTAGAACCGAATTTGTG	20	1	hsa-miR-10b-5p:4-23(1)	26.703	34.0701	14.5485	14.7859	14.3521	0.63704	0.568099	0.950454	1.8713	4.2922	0.530038	0.637473	0.963825	1.12263	0.265361	0.305902	0	0.668875	0.759107	0.683038	0.294174	0.733483	0.261376	4.70163	0	2.14602	2.16673	2.43179	2.50285	0.356687	5.62671	0.83295	1.9428	3.49013	2.77571	25.3517	12.1956	46.0255	13.9951	26.7412	1.66382	1.22664	0.695658	2.05516	2.37489
srna32313	CTGTAGAACCGAATTT	16	1	hsa-miR-10b-5p:5-20(1)	5.00682	9.60951	7.61415	0	11.5252	0.828152	0.284049	1.58409	1.70118	4.3798	2.47351	0.849964	1.37689	1.54362	0.189544	0.509837	0	0	0.975995	0	0.294174	1.46697	0.261376	1.22651	0	0.195093	1.08337	0.694797	1.16204	0.594479	3.20141	1.94355	1.2952	0.410603	1.04089	8.17798	8.13038	19.3384	5.93733	11.0231	0.739474	0.204439	0.463772	2.32918	3.60983
srna39116	CTGTAGAACCGAATTTGA	18	1	hsa-miR-10b-5p:5-21(1)	12.9343	19.219	11.2853	0	11.9601	0.254816	0.142025	0.633636	0.680472	0.788364	0.353358	0.637473	0.275378	0.631481	0.189544	0	0	0	0.433775	0.683038	0.294174	0	0	0.204419	0	0	0.270842	0	0.0893876	0	0.194025	0.5553	0.6476	0.205302	0.520446	6.54238	12.1956	29.0077	12.0867	27.7618	0.184868	0	0.695658	0.411032	0.569973
srna10039	CTGTAGAACCGAATTTG	17	1	hsa-miR-10b-5p:5-21(1)	32.1271	53.2891	33.5838	29.5718	43.4913	1.5926	2.13037	3.16818	3.7426	12.789	3.00355	3.18737	2.54725	3.29774	0.720266	0.815739	0	0.334437	6.1813	2.04911	1.1767	4.03416	0.784128	2.86186	0	2.53621	2.43758	2.08439	3.30734	1.18896	9.79824	4.4424	3.5618	2.87422	4.68401	33.5297	60.9778	96.6922	30.9589	59.6063	1.47895	3.67991	1.39132	7.53558	5.88972
srna20221	TACTCTGTAGAACCGAATTTG	21	1	hsa-miR-10b-5p:5-21(1)	2.08618	0.873592	1.6316	0	3.4793	1.33778	1.77531	1.90091	3.23224	12.1758	7.59721	5.52477	7.15984	7.15679	0	0	0	0	7.04885	0.683038	2.05922	3.66741	0	1.22651	3.88336	1.75584	4.87515	2.43179	2.94979	0	0.679086	0	0	0	0.693928	0	0	3.86769	0.84819	3.87849	1.47895	2.24883	1.39132	7.8096	7.50465
srna5320	TACTCTGTAGAACCGAATTTGT	22	1	hsa-miR-10b-5p:5-22(1)	12.5171	21.8398	16.452	0	26.5297	4.45928	5.68099	5.06909	16.3313	39.0678	32.8623	27.4113	29.3966	34.6613	0.0379087	0.101967	0	0	17.351	0	3.82427	3.66741	0	6.33698	0	4.09695	6.22936	6.60057	12.3355	0	0.970123	0.27765	0	0	0.346964	10.6314	22.3585	39.4504	12.9349	38.1725	7.94934	7.56425	2.08697	17.2633	22.229
srna41725	CTCTGTAGAACCGAATTTGT	20	1	hsa-miR-10b-5p:5-22(1)	8.3447	4.36796	4.35094	0	9.13317	0.31852	0.426074	0.950454	1.02071	2.80307	2.47351	1.06246	1.44574	2.10494	0	0	0	0	1.19288	0.683038	0.294174	1.46697	0.261376	0.613256	0	0.585278	1.35421	0.347398	1.69836	0	0.0970123	0	0	0	0	5.72459	4.06519	15.8575	3.39276	14.2892	0.739474	0.408878	0.231886	1.37011	2.0899
srna1975	CTGTAGAACCGAATTTGT	18	1	hsa-miR-10b-5p:5-22(1)	279.965	370.403	300.487	88.7154	406.209	3.1215	4.33175	2.85136	8.16567	26.2788	10.2474	6.58722	7.98597	11.4368	1.2889	1.63148	0	0.334437	12.2542	0	2.64757	6.96809	1.56826	8.17675	7.76672	5.26751	6.5002	10.0746	10.9053	3.09129	22.9919	7.7742	4.2094	6.98026	15.4399	210.992	357.737	722.484	187.026	643.013	3.69737	8.79089	2.55074	11.6459	16.1492
srna19673	ACTCTGTAGAACCGAATTTGT	21	1	hsa-miR-10b-5p:5-22(1)	7.093	9.60951	5.16675	0	9.56809	1.21038	1.98835	0.950454	4.25295	13.0518	7.42053	7.86217	5.92064	7.85843	0	0	0	0	1.7351	0.683038	0	1.46697	0	1.22651	3.88336	1.56074	2.70842	1.0422	2.41347	0	0.485062	0.5553	0	0	0.173482	2.45339	2.03259	13.9237	2.96866	10.0024	3.69737	2.86215	1.15943	5.48042	6.93467
srna41398	TACTCTGTAGAACCGAATTTGTG	23	1	hsa-miR-10b-5p:5-23(1)	2.08618	1.74718	2.44741	0	1.5222	0.828152	0.497086	0	1.53106	3.59144	2.47351	4.46231	3.02916	2.80658	0	0	0	0	1.19288	0	0.588349	1.10022	0.261376	1.02209	0	0.780371	0.541683	0.694797	1.4302	0	0.0970123	0	0	0	0	1.6356	2.03259	4.64123	1.48433	3.2661	1.29408	0.204439	0.695658	1.2331	2.37489
srna12712	CTGTAGAACCGAATTTGTG	19	1	hsa-miR-10b-5p:5-23(1)	60.0819	96.0951	35.4874	29.5718	33.0534	0.891856	0.639111	0.316818	1.70118	3.94182	1.06008	1.91242	1.30805	1.54362	0.189544	0.203935	0	0	2.06043	0.683038	0	0.733483	0.261376	1.22651	0	1.36565	0.812525	2.43179	1.87714	0.951166	4.65659	1.38825	1.619	2.05302	4.8575	49.8857	26.4237	99.3996	39.0167	60.0146	0.739474	0.613318	0.463772	2.32918	1.51993
srna39953	CTGTAGAACCGAATTTGTGA	20	1	hsa-miR-10b-5p:5-23(1)	17.1066	35.8173	9.10979	0	15.0045	0.063704	0.142025	0	0.170118	1.40154	0.706717	0.212491	0.413068	0.140329	0.113726	0.101967	0	0	0.542219	0.683038	0	1.10022	0	0	0	0.195093	0.541683	0	0.804488	0	0.679086	0.5553	0.3238	0.615905	0.693928	12.267	10.163	24.7532	11.4506	21.842	0.739474	0	0.231886	0.411032	0.474978
srna39881	TGTAGAACCGAATTT	15	1	hsa-miR-10b-5p:6-20(1)	5.00682	9.60951	8.42995	14.7859	9.78554	0.31852	0.355062	0.316818	0.680472	2.45269	1.41343	1.06246	1.37689	1.26296	0.189544	0	0	0.334437	1.7351	0	0.588349	0.366741	0	0	0	0	0.541683	0.347398	0.715101	0.118896	1.94025	0.5553	1.2952	0.205302	1.21437	7.36018	10.163	17.7914	4.66504	11.6355	0.369737	0.613318	0.231886	1.91815	1.89991
srna13343	TGTAGAACCGAATTTG	16	1	hsa-miR-10b-5p:6-21(1)	27.9548	50.6683	36.1672	22.1789	47.623	0.700744	0.994173	0.950454	1.19083	4.99297	1.94347	1.69993	1.78996	2.45576	0.606539	0	0	0.334437	5.63908	0	0.294174	2.20045	0	1.63535	0	0.780371	1.62505	0.694797	1.51959	0.475583	2.3283	0.5553	0.3238	0.821207	1.73482	28.6229	63.0104	80.4479	31.171	59.6063	1.10921	0.817757	0.695658	2.05516	3.41984
srna2553	TGTAGAACCGAATTTGT	17	1	hsa-miR-10b-5p:6-22(1)	241.162	307.504	252.491	88.7154	342.929	1.91112	2.34341	3.16818	4.76331	14.9789	7.42053	7.0122	5.50757	8.41975	0.909809	0	3.54315	0.668875	10.7359	0	2.3534	3.66741	0	2.86186	7.76672	1.95093	3.2501	3.82138	4.20122	1.66454	5.82074	0.83295	0.3238	2.25832	2.94919	206.903	292.694	570.484	152.038	537.886	3.88224	3.88435	1.15943	6.57651	8.35961
srna17430	TGTAGAACCGAATTTGTG	18	1	hsa-miR-10b-5p:6-23(1)	40.4718	73.3817	33.7198	22.1789	33.9232	0.063704	0.426074	0	0.340236	2.2775	1.06008	0	0.757291	1.1928	0.0379087	0.101967	0	0	0.433775	0.683038	0	0.733483	0.261376	0.408837	0	0.585278	0	0.694797	0.804488	0.237792	1.35817	0.27765	0.6476	0.615905	0.693928	34.3475	20.3259	92.051	29.8987	45.7254	0.369737	0.204439	0.231886	1.37011	0.189991
srna31200	GTAGAACCGAATTTG	15	1	hsa-miR-10b-5p:7-21(1)	11.2653	18.3454	11.8291	0	16.9616	0.191112	0.142025	0	0.850591	2.80307	0.353358	0.424982	0.757291	0.701646	0.151635	0	0	0	1.84355	0	0.882523	0.733483	0.261376	0.613256	0	0.195093	0.812525	1.38959	0.446938	0	0.873111	0.5553	0.6476	0.821207	0.520446	14.7204	18.2934	39.0637	14.2072	26.9453	0.554605	0.613318	0.695658	1.2331	1.99491
srna5597	GTAGAACCGAATTTGT	16	1	hsa-miR-10b-5p:7-22(1)	69.261	127.544	115.028	14.7859	145.261	1.14667	1.34923	2.53454	3.57248	10.9495	2.47351	1.27495	1.78996	2.24527	0.227452	0.101967	0	0	3.57865	0	1.76505	1.46697	0.261376	1.22651	0	0.780371	1.35421	0.347398	2.68163	0.237792	1.5522	0.27765	0.9714	0.615905	0.693928	89.14	113.825	262.229	65.9468	251.081	1.10921	2.45327	1.15943	4.65836	6.07971
srna29289	GTAGAACCGAATTTGTG	17	1	hsa-miR-10b-5p:7-23(1)	25.4513	41.0588	17.5397	0	17.614	0.254816	0.0710123	0.633636	0.340236	1.31394	0.176679	0.424982	0.481912	0.631481	0	0	0	0	0.650663	1.36608	0	0.733483	0	0	0	0	0.270842	0	0.268163	0.118896	0.388049	0.27765	0	0.205302	0.346964	21.2627	8.13038	47.5726	19.5084	31.4362	0.554605	0	0	0.274021	0.664969
srna17348	TAGAACCGAATTTGT	15	1	hsa-miR-10b-5p:8-22(1)	37.9684	35.8173	32.2242	7.39295	38.0549	0.445928	0.142025	0	0.850591	2.54028	1.23675	1.06246	0.344223	0.982304	0	0	0	1.00331	1.62666	0.683038	0.588349	0.366741	0.261376	0.613256	0	0.195093	0.270842	0	0.35755	0	0.679086	0	0	0.205302	0.173482	33.5297	60.9778	66.5243	18.6602	76.1409	0.554605	0.408878	0.231886	2.05516	1.89991
srna43808	TTTCCGGCTCGCGTGGGTG	19	1	hsa-miR-1180-3p:1-19(1)	0.417235	0	0.407901	0	0	0.509632	0.710123	0.633636	0.680472	0.700768	4.59366	0.212491	0.137689	1.75411	0.682357	0.305902	0	0	1.7351	35.518	7.35436	0.366741	0.261376	4.29279	7.76672	1.17056	0.270842	1.38959	0.0893876	2.7346	1.84323	0.27765	9.0664	0	0.173482	0	0	0	0	0	0.184868	0.408878	0.927544	1.91815	1.70992
srna13468	TTTCCGGCTCGCGTGGGTGT	20	1	hsa-miR-1180-3p:1-20(1)	5.42406	0	1.49564	0	0	1.40149	4.40276	8.8709	9.18638	7.00768	3.53358	1.69993	0	6.7358	2.88106	0.815739	0	2.00662	28.1954	37.5671	12.6495	2.93393	0.522752	3.88396	15.5334	1.75584	4.06263	4.16878	3.12857	1.66454	10.2833	0	2.5904	0.205302	2.77571	0	0	1.54708	0.212047	1.42892	0.739474	3.06659	0.231886	7.39857	6.2697
srna43114	TTTCCGGCTCGCGTGGGTGTG	21	1	hsa-miR-1180-3p:1-21(1)	0	0	0.679835	0	0.217457	1.72001	0.639111	0	1.53106	0.525576	0.706717	1.06246	1.17036	1.40329	0.606539	0.305902	0	1.33775	0.108444	0	1.1767	3.30067	1.30688	0.204419	0	0.390186	2.97926	1.0422	0	2.8535	1.64921	0	0.6476	0.205302	0	0	0	4.64123	0.424095	0.408262	1.10921	7.35981	1.6232	2.74021	1.04495
srna12723	TTTCCGGCTCGCGTGGGTGTGT	22	1	hsa-miR-1180-3p:1-22(1)	0	0	6.39045	0	1.95711	4.33187	2.91151	2.53454	5.95413	8.40922	12.7209	5.94975	2.20303	3.71872	2.46407	8.25936	42.5178	0	2.16888	15.7099	6.17766	22.0045	13.8529	2.45302	0	5.85278	8.93778	5.21098	0.268163	0	2.03726	2.49885	3.238	3.90073	0	0	0	0	5.30119	3.87849	3.32763	7.97313	5.79715	8.63167	4.2748
srna25616	ATATACAGGGGGAGACTCTTAT	22	1	hsa-miR-1185-1-3p:1-22(1)	0	0	0	0	0	0.764448	0.0710123	0	0.680472	0.087596	0	5.73726	0	3.99938	13.0027	6.11804	0	0.334437	0.867551	0	0	0	0	0	0	0	2.97926	0.347398	3.21795	4.16135	1.64921	0	0	0	0	0	0	0	0	0	0.184868	0	0	0	2.75487
srna41452	TAGGACACATGGTCTACTTCT	21	1	hsa-miR-1197:1-21(1)	0	0	0	0	0	0	0.994173	0	1.70118	1.22634	0.883396	4.6748	0	3.29774	2.91897	3.87476	0	0	0	0	10.2961	0	0	0	0	0	0	0	1.87714	0	1.16415	0	0	0	0	0	0	0	0	1.83718	0	4.90654	0	0	0.284987
srna39413	AACGCCATTATCACACTAAAT	21	1	hsa-miR-122-3p:1-21(1)	0	0	0	0	0	1.72001	5.11289	0	4.42307	0	8.4806	6.79971	0	0	0.113726	0.203935	0	2.00662	0	0	0	0	0	0	0	10.9252	0	0	0	3.21019	0	6.38595	0	2.05302	0.693928	0	0	0	0	0	2.58816	5.51986	1.39132	0	0.85496
srna7040	TGGAGTGTGACAATGGTGTTT	21	2	hsa-miR-122-5p:1-21(1);hsa-miR-3591-3p:1-21(-1)	30.8754	19.219	13.3248	0	37.8374	4.96891	7.4563	1.90091	0.510354	2.62788	3.00355	3.39986	5.23219	2.73642	14.7465	12.644	0	21.0696	0.433775	0	0.294174	0	0	4.90605	0	19.5093	0	0	5.54203	0	1.64921	0	0.9714	9.44387	4.16357	34.3475	134.151	71.939	81.0021	21.0255	17.3776	12.2664	89.508	0.959074	2.84987
srna2369	TGGAGTGTGACAATGGTGTTTG	22	1	hsa-miR-122-5p:1-22(1)	33.3788	45.4268	57.514	0	22.6155	20.6401	42.2523	14.8904	0.170118	7.53326	20.4948	13.1744	13.6312	12.2788	37.2643	38.3397	0	54.1789	7.1573	12.2947	7.94271	0.366741	0	15.127	0	21.4602	5.14599	1.73699	16.8943	2.7346	1.26116	9.16245	23.6374	22.5832	43.7175	178.28	152.445	176.367	177.696	46.3378	114.618	16.764	136.117	5.48042	2.46988
srna13838	TGGAGTGTGACAATGGTGTTTGT	23	1	hsa-miR-122-5p:1-22(1)	0	38.4381	10.0616	0	28.2694	1.5289	4.68681	0	0	1.57673	2.65019	2.76238	3.71761	2.03477	0.985627	0.101967	0	9.69869	0	0	0	0	0	0	0	0	0	0	4.20122	0	0	0	0	0	0	48.2501	123.988	202.28	26.5059	38.5808	16.0836	0.204439	4.63772	0.137011	0
srna10698	TGGAGTGTGACAATGGTGTTTGA	23	1	hsa-miR-122-5p:1-22(1)	16.6894	0	23.9302	0	2.39202	4.20446	8.87654	0	2.04142	0	7.77389	0	4.4749	5.40267	4.96604	2.34525	0	2.6755	0	0	0	3.66741	0	0	0	7.60862	14.8963	2.77919	6.61468	4.39914	0	0	0	8.00676	11.1028	2.45339	28.4563	7.73538	23.5373	0.612393	39.7467	0	15.7682	0	0
srna45344	GAGTGTGACAATGGTGTTTG	20	1	hsa-miR-122-5p:3-22(1)	0.417235	0.873592	1.08774	0	0.65237	0	1.06519	0.316818	0	0.087596	0.353358	0	0.137689	1.33313	0.0758174	0.509837	0	92.6392	0.216888	0	0	2.20045	0	0.408837	0	0	0	0	0.0893876	0.594479	0	0.27765	0.6476	2.66892	0	3.27119	0	1.93384	3.18071	0.612393	0.739474	0.204439	9.50732	0.959074	0
srna12683	AATGGATTTTTGGAGCAGGGAG	22	1	hsa-miR-1246:1-18(1)	10.8481	2.62078	1.76757	0	8.26335	3.44002	2.05936	16.4745	2.21154	6.83249	9.18732	2.76238	3.92414	1.26296	3.0327	5.09837	31.8883	9.02981	10.1937	7.51341	12.0612	0.733483	2.09101	2.24861	0	9.55955	1.62505	1.0422	2.41347	1.42675	4.55958	2.2212	8.095	2.87422	8.15366	4.90679	60.9778	6.1883	20.1445	4.28675	4.25197	8.79089	10.203	11.6459	4.65478
srna14841	AATGGATTTTTGGAGCAGGGA	21	1	hsa-miR-1246:1-19(1)	1.25171	0	5.30271	0	2.17457	4.39558	1.1362	4.43545	4.25295	6.04412	7.95057	0.424982	3.8553	2.80658	1.89544	0.815739	0	1.00331	19.1946	1.36608	12.9437	11.369	4.70477	1.43093	0	1.17056	6.77104	6.94797	3.03918	0.83227	3.29842	1.94355	9.3902	7.59616	3.8166	0.817798	6.09778	1.54708	7.63371	8.57351	6.4704	11.8575	9.27544	6.4395	2.37489
srna21935	AGGATGAGCAAAGAAAGTAGATT	23	1	hsa-miR-1255a:1-23(1)	0	0	0	0	0	0.382224	0.852148	0.950454	4.93343	5.08057	2.65019	5.94975	3.92414	0	4.16996	3.97673	0	0	0.108444	0	0.294174	1.46697	0	2.45302	0	0	7.31273	0.347398	7.15101	3.80466	0	6.1083	2.2666	0	8.15366	0	0	0	0	0	7.39474	2.24883	0	1.2331	2.27989
srna11500	CGGATGAGCAAAGAAAGTGGTT	22	1	hsa-miR-1255b-5p:1-22(1)	0	0	4.07901	0	3.04439	3.37631	5.53896	26.6127	4.42307	11.3875	26.3252	0.212491	3.16685	5.7535	2.80524	2.24328	0	5.01656	1.7351	0	0.882523	15.0364	0	0.204419	0	9.55955	0.541683	0	7.68733	0.713375	0	4.16475	0	6.15905	3.12268	0	10.163	0	8.69394	0	14.2349	7.15537	14.3769	12.742	15.1993
srna37302	ACAGGTGAGGTTCTTGGGAGC	21	1	hsa-miR-125a-3p:1-21(1)	0	0	0	0	0	2.35705	0.639111	11.7223	0	0	0	0	0.89498	1.47346	2.42616	0	0	0	0	0	0	0	1.30688	0	0	0	0	0	0.268163	0.356687	1.26116	8.60715	0	0	2.60223	0	0	6.57507	3.18071	4.69502	2.21842	2.86215	1.6232	0	1.51993
srna31594	TCCCTGAGACCCTTTAACC	19	1	hsa-miR-125a-5p:1-19(1)	0.83447	2.62078	0.271934	0	0.434913	1.5289	2.91151	7.92045	1.8713	2.1023	2.29683	1.48744	3.30454	3.22757	0.833992	0.40787	0	0.668875	2.49421	2.04911	0.294174	6.2346	1.30688	0.817675	0	1.17056	1.35421	1.38959	0.893876	0.237792	1.74622	0.83295	1.9428	0.615905	2.25527	2.45339	2.03259	0	0.84819	0.612393	4.43684	2.45327	2.31886	2.46619	2.46988
srna29272	TCCCTGAGACCCTTTAACCGG	21	1	hsa-miR-125a-5p:1-19(1)	2.08618	1.74718	1.90354	7.39295	1.95711	1.08297	0.994173	1.26727	1.8713	2.80307	0.883396	0.637473	0.826135	2.73642	0.720266	0.509837	0	0	2.49421	13.6608	0.588349	4.4009	0.261376	0.817675	0	1.75584	2.16673	0.347398	2.68163	1.54565	3.49244	1.6659	3.5618	1.84771	4.68401	0.817798	0	3.09415	1.06024	2.44957	2.77303	2.24883	0.927544	2.32918	1.32994
srna4276	TCCCTGAGACCCTTTAACCT	20	1	hsa-miR-125a-5p:1-20(1)	3.33788	5.24155	8.83785	0	3.26185	17.9008	26.4876	21.5436	20.9245	27.8555	23.675	13.1744	17.7619	27.9255	6.17912	3.67083	3.54315	5.68544	27.5447	7.51341	11.767	29.3393	0.784128	6.95024	0	1.36565	18.1464	9.37976	9.20692	4.16135	15.91	13.0495	21.3708	7.59616	34.176	4.90679	52.8475	2.70738	18.2361	3.2661	55.0908	23.3061	10.203	15.0712	16.5292
srna661	TCCCTGAGACCCTTTAACCTG	21	1	hsa-miR-125a-5p:1-21(1)	177.742	77.7497	92.8655	0	97.638	99.5056	116.673	154.29	148.173	197.091	99.2937	89.2462	136.037	167.904	46.1349	30.5902	14.1726	30.7682	163.967	232.916	57.9524	291.926	27.9672	73.1819	7.76672	81.3537	141.65	150.771	129.344	71.0997	154.056	186.858	278.792	133.651	216.332	96.5002	113.825	123.379	75.913	147.791	235.522	139.632	90.6674	136.874	110.575
srna3462	TCCCTGAGACCCTTTAACCTGA	22	1	hsa-miR-125a-5p:1-21(1)	0	24.4606	3.67111	0	8.69826	10.8297	18.3212	46.8891	17.5222	27.33	5.83041	13.5994	28.5705	27.2239	2.84315	1.32558	0	2.00662	18.2186	34.1519	2.64757	46.5762	10.455	25.7568	0	24.7768	18.9589	4.16878	26.1906	15.0998	19.0144	37.7604	41.7702	14.987	28.9715	0	0	0.386769	5.72528	6.32807	47.3263	29.2348	27.5944	12.879	10.5445
srna8579	TCCCTGAGACCCTTTAACCTGG	22	1	hsa-miR-125a-5p:1-21(1)	0.417235	2.62078	1.6316	0	4.78404	7.26226	9.58667	12.0391	11.3979	15.8549	4.77034	5.31228	6.74677	7.78827	4.13205	1.01967	0	0.668875	9.43462	15.7099	1.76505	15.0364	0.522752	6.95024	0	4.87732	5.14599	6.60057	9.83264	4.39914	12.6116	11.3836	10.3616	3.28483	12.4907	1.6356	0	3.09415	0.84819	1.22479	14.6046	8.99533	7.65223	10.2758	11.1145
srna44567	TCCCTGAGACTCTTTAACCTG	21	1	hsa-miR-125a-5p:1-21(1)	0.417235	0	0	0	1.08728	0.95556	1.84632	0	0	1.57673	0.176679	0	0	1.26296	0.189544	0.40787	0	0	6.61508	0	14.1204	0	0	0.204419	0	0	0	0	1.96653	4.04246	0	0	8.095	0.410603	1.9083	0	0	0	0	0	0.924342	1.63551	0.231886	1.50712	1.51993
srna11772	TCCCTGAGACCCTTTAACCTGTA	23	1	hsa-miR-125a-5p:1-22(1)	0	0	0	0	0	3.1215	2.48543	10.1382	0	11.6503	8.30392	2.76238	6.3337	7.7181	1.81962	1.01967	0	0	12.9048	0	0	26.4054	0	0.613256	0	0	0	9.72716	1.69836	3.92356	1.84323	6.38595	15.5424	1.43711	10.9294	0	0	6.57507	0	0	21.2599	9.4042	10.203	8.22064	6.3647
srna17552	TCCCTGAGACTCTTTAACCTGT	22	1	hsa-miR-125a-5p:1-22(1)	10.8481	0	3.26321	0	11.3077	6.11558	2.48543	10.455	2.55177	4.64259	7.24385	0.849964	0	2.59609	0.530722	0	0	0	1.7351	0	0	2.20045	2.35238	12.674	0	1.95093	0	5.21098	1.51959	2.14012	1.94025	6.94125	0	0	11.1028	0	0	13.1501	0	6.73633	5.91579	10.222	6.26092	6.30249	2.0899
srna532	TCCCTGAGACCCTTTAACCTGT	22	1	hsa-miR-125a-5p:1-22(1)	55.075	89.1064	51.6675	177.431	54.3641	217.995	255.999	373.212	261.812	417.395	164.488	145.556	188.703	242.208	76.7651	24.6761	14.1726	16.7219	257.663	183.737	104.726	250.851	28.2286	101.596	0	116.861	147.338	200.449	195.848	63.3714	267.754	139.103	214.032	102.651	204.015	64.606	87.4016	108.682	22.477	68.3839	455.331	301.752	205.683	247.441	280.902
srna4512	TCCCTGAGACCCTTTAACCTGTGAA	25	1	hsa-miR-125a-5p:1-23(1)	81.3609	11.3567	24.61	0	0	27.4564	22.795	25.0286	5.6139	5.60614	8.30392	20.8241	15.1458	10.8053	40.4107	17.9463	0	2.34106	22.5563	0	9.70776	19.804	0.522752	12.8784	0	5.4626	13.8129	13.8959	16.7155	0	0.582074	17.7696	58.9316	26.4839	15.4399	0	0	0	8.69394	14.0851	16.4533	19.6262	11.3624	2.32918	4.84477
srna1116	TCCCTGAGACCCTTTAACCTGTG	23	1	hsa-miR-125a-5p:1-23(1)	226.976	91.7272	136.783	22.1789	35.228	111.227	91.7479	121.975	47.1227	71.7411	61.3077	111.77	83.0266	101.598	67.5154	22.1269	0	7.02319	39.3651	6.14734	30.8883	74.0818	26.6604	21.8728	31.0669	15.9976	43.8764	20.1491	53.275	17.121	41.8123	53.8641	51.808	55.842	88.3024	67.0594	119.923	96.6922	34.3517	152.078	186.902	125.117	84.1746	49.3238	52.8175
srna1444	TCCCTGAGACCCTTTAACCTGTGG	24	1	hsa-miR-125a-5p:1-23(1)	107.647	30.5757	44.8691	7.39295	19.1362	100.525	71.5804	78.5708	31.642	33.3741	28.622	47.8105	52.2531	50.729	127.297	43.0302	24.802	3.67881	29.6052	18.442	25.8874	59.7788	17.5122	22.6905	0	9.94973	41.9805	28.1393	49.5207	20.8068	26.7754	34.4286	92.283	44.1398	78.2404	4.90679	18.2934	13.5369	13.9951	38.5808	82.4513	43.3411	40.1163	12.0569	23.7489
srna5661	TCCCTGAGACCCTTTAACCTGTGT	24	1	hsa-miR-125a-5p:1-23(1)	36.7167	0	6.79835	0	0	34.0816	23.9312	16.1577	13.7796	10.8619	4.59366	11.8995	16.385	17.8218	21.6838	3.97673	0	0	0.108444	0	0	0	0	9.40326	0	0.975464	6.22936	9.72716	12.6037	2.97239	12.4176	18.0472	9.3902	1.02651	19.2565	0	0	0.773538	0	2.24544	25.8816	22.6928	15.5364	6.4395	6.64969
srna27818	TCCCTGAGACCCTTTAACCTGTGAT	25	1	hsa-miR-125a-5p:1-24(1)	0.83447	0.873592	5.16675	0	6.08878	4.90521	3.12454	0.633636	0.170118	0.700768	0.353358	0	1.78996	3.71872	3.9046	1.63148	0	0	4.01242	33.4688	0	0.366741	0	0.204419	0	1.17056	0	0	0.983264	0	0.0970123	0.27765	0.3238	0.205302	3.12268	0	0	0.386769	0	0	4.25197	0.204439	0	1.2331	0.0949955
srna485	TCCCTGAGACCCTTTAACCTGTGA	24	1	hsa-miR-125a-5p:1-24(1)	461.045	203.547	225.297	44.3577	59.3656	402.036	306.489	329.491	133.883	137	114.488	177.005	211.973	211.055	438.073	153.971	56.6903	13.0431	118.529	36.884	85.3106	208.676	59.3324	83.6073	3.88336	40.9695	151.401	113.252	177.077	76.8067	74.7965	124.387	402.159	180.255	273.755	33.5297	77.2386	66.911	51.5275	172.899	358.46	173.773	155.132	43.4324	76.4714
srna18325	CCCTGAGACCCTTTAACCTG	20	1	hsa-miR-125a-5p:2-21(1)	5.42406	3.49437	4.07901	0	6.30624	2.86668	3.4796	4.75227	5.10354	5.43095	1.59011	3.18737	4.13068	6.31481	1.47844	0.917707	0	1.33775	5.20531	12.2947	1.1767	10.2688	1.56826	0.817675	0	0.975464	1.89589	4.51618	2.59224	1.66454	2.81336	4.4424	4.2094	0.821207	4.16357	5.72459	6.09778	5.41477	4.0289	7.34872	5.73092	2.65771	1.39132	2.46619	2.46988
srna14628	CCCTGAGACCCTTTAACCTGT	21	1	hsa-miR-125a-5p:2-22(1)	5.42406	8.73592	2.99127	0	3.26185	5.66966	6.81718	8.55408	6.12425	10.2487	4.41698	2.97487	5.64526	7.01646	1.89544	1.01967	0	0.668875	8.35018	4.78126	3.53009	8.43505	1.0455	2.04419	0	2.53621	2.43758	2.43179	3.66489	1.30785	5.62671	3.3318	3.8856	1.84771	2.77571	3.27119	12.1956	5.80153	1.27228	3.67436	9.24342	6.33762	5.10149	5.75445	7.31466
srna23744	CCCTGAGACCCTTTAACCTGTG	22	1	hsa-miR-125a-5p:2-23(1)	11.2653	4.36796	5.57465	0	1.5222	4.7141	3.62163	3.16818	1.70118	2.54028	1.94347	1.27495	2.89147	4.20988	3.82878	1.83541	10.6294	0	2.06043	1.36608	2.3534	4.03416	0.522752	1.02209	0	0.390186	1.35421	1.0422	1.25143	0.594479	1.35817	2.2212	1.2952	0.410603	1.9083	1.6356	4.06519	6.96184	1.27228	8.36938	5.73092	5.11098	2.31886	2.74021	2.1849
srna12308	CCCTGAGACCCTTTAACCTGTGA	23	1	hsa-miR-125a-5p:2-24(1)	28.7892	6.98874	12.9169	0	2.82694	9.74671	8.30844	7.60363	3.7426	5.34336	3.53358	6.16224	6.19602	4.77119	10.8419	3.05902	17.7157	0.668875	4.01242	2.73215	2.94174	8.43505	1.82963	0.408837	0	0.780371	2.16673	2.08439	3.12857	1.07006	1.64921	1.6659	11.0092	4.72194	4.16357	4.90679	2.03259	8.12215	4.0289	12.452	7.20987	4.7021	3.47829	1.09608	1.70992
srna41559	CCTGAGACCCTTTAACCTGT	20	1	hsa-miR-125a-5p:3-22(1)	0.417235	3.49437	1.08774	0	2.82694	1.5289	1.77531	1.90091	2.72189	5.34336	1.41343	0.424982	1.03267	1.54362	0.530722	0.203935	0	0.334437	2.06043	2.73215	0.882523	1.83371	0.261376	0.204419	0	1.36565	0.541683	1.73699	0.893876	0.118896	1.64921	0.5553	0.6476	0.410603	1.9083	0	4.06519	2.32061	1.27228	1.83718	4.99145	2.45327	1.85509	2.05516	1.80491
srna36449	CCTGAGACCCTTTAACCTGTGA	22	1	hsa-miR-125a-5p:3-24(1)	19.6101	8.73592	9.65366	0	3.69676	2.48446	2.84049	1.26727	0.680472	0.525576	0.706717	1.48744	0.963825	0.77181	2.88106	0.815739	0	0	0.975995	0.683038	0.882523	0.733483	0.261376	0.204419	0	0	0.541683	1.0422	0.268163	0.475583	0.485062	0.5553	2.2666	0.821207	3.46964	0.817798	2.03259	4.25446	1.48433	6.94046	2.77303	3.67991	0.927544	0.411032	0.759964
srna29137	CTGAGACCCTTTAACCTG	18	1	hsa-miR-125a-5p:4-21(1)	7.51023	1.74718	13.8686	0	5.87133	1.14667	2.76948	0.950454	1.36094	2.01471	0.706717	1.06246	2.13418	1.40329	0.530722	0.40787	3.54315	0	3.79554	5.4643	0.294174	3.66741	0	1.02209	0	0.975464	2.16673	3.12659	1.69836	1.07006	2.52232	1.6659	3.8856	1.43711	2.94919	5.72459	4.06519	5.028	3.60481	5.51154	2.58816	2.45327	0.463772	1.2331	1.23494
srna27206	CTGAGACCCTTTAACCTGT	19	1	hsa-miR-125a-5p:4-22(1)	2.50341	6.11514	5.71061	7.39295	3.26185	1.72001	2.76948	4.11863	1.8713	4.02942	2.12015	0.849964	1.30805	1.33313	1.3268	0.305902	0	1.33775	4.4462	3.41519	2.3534	4.76764	0.522752	1.22651	0	0.780371	2.43758	1.38959	2.50285	0.594479	4.26854	0.27765	1.619	1.84771	2.25527	0	0	6.1883	0.636142	4.08262	4.06711	2.65771	0.927544	2.87722	1.80491
srna26475	CTGAGACCCTTTAACCTGTGA	21	1	hsa-miR-125a-5p:4-24(1)	23.7824	13.1039	15.5002	0	3.04439	2.73927	2.13037	3.80182	0.850591	0.963556	0.530038	0.849964	3.02916	1.1928	4.16996	1.42754	0	0.334437	1.51821	0	0.588349	1.46697	0.261376	0.613256	0	0.585278	0.812525	1.73699	2.59224	4.28025	0.679086	0.5553	2.2666	0.615905	2.94919	0.817798	2.03259	2.70738	3.81685	7.96112	2.03355	1.83995	1.15943	0.685053	0.569973
srna33268	ACAAGTCAGGCTCTTGGGAC	20	1	hsa-miR-125b-2-3p:3-22(1)	0	0	0	0	0	1.40149	0.639111	0	8.16567	2.80307	0	6.58722	1.78996	1.89444	0.568631	2.54918	46.0609	4.68212	1.62666	0	0	0	0	0	0	0	0	0	2.8604	0	4.36555	0	12.952	0.205302	4.51053	0	0	0	0	6.32807	4.43684	0.408878	6.26092	5.06939	4.65478
srna17173	TCCCTGAGACCCTAACTTG	19	1	hsa-miR-125b-5p:1-19(1)	10.8481	4.36796	0	0	0.434913	1.6563	2.20138	13.94	3.7426	3.06586	6.18377	2.97487	1.44574	5.26234	1.70589	1.01967	42.5178	6.01987	2.92798	2.73215	0.882523	2.20045	0.261376	7.15466	0	10.7301	2.16673	5.21098	3.75428	0.475583	1.74622	0.5553	9.3902	8.41737	9.88848	0	0	0.386769	0	0	3.5125	9.4042	22.4929	1.64413	6.64969
srna5420	TCCCTGAGACCCTAACTTGT	20	1	hsa-miR-125b-5p:1-20(1)	0.417235	0	0.271934	0	1.73965	10.7023	10.5808	51.3245	15.821	24.1765	7.42053	8.07466	14.5951	11.928	3.82878	1.52951	0	0.334437	13.7724	0.683038	2.3534	16.5034	2.09101	13.4916	0	21.07	17.6047	9.03236	14.9277	15.4565	23.38	8.05185	9.0664	3.07952	9.88848	0	6.09778	5.80153	0.424095	0.408262	31.2428	26.986	52.1743	22.6068	22.134
srna7332	TCCCTGAGACCCTAACTTGTG	21	1	hsa-miR-125b-5p:1-21(1)	11.2653	9.60951	9.38172	0	0.434913	8.72745	6.46212	25.0286	6.97484	10.8619	8.12724	13.5994	6.40255	11.8578	4.54905	4.18066	7.08629	7.35762	1.7351	19.8081	14.1204	10.2688	0.784128	5.92814	0	1.95093	2.43758	1.73699	10.4584	10.7006	3.78348	5.553	30.1134	6.77495	13.3581	38.4365	75.206	31.3283	5.72528	16.7388	22.1842	9.19977	13.6813	6.4395	4.84477
srna8240	TCCCTGAGACCCTAACTTGTGG	22	1	hsa-miR-125b-5p:1-21(1)	0.83447	1.74718	3.67111	0	1.95711	6.24299	4.47378	12.9895	7.4852	7.97124	10.7774	7.86217	7.29753	10.1037	3.26015	4.58853	7.08629	8.69537	8.24173	21.8572	15.8854	26.7721	2.87514	2.04419	0	10.7301	5.95852	5.90577	10.369	5.5881	2.91037	7.2189	6.476	5.95375	14.9195	0.817798	28.4563	7.73538	4.24095	3.67436	16.6382	9.60864	16.232	3.28825	4.65478
srna2233	TCCCTGAGACCCTAACTTGTGAA	23	1	hsa-miR-125b-5p:1-21(1)	12.5171	0	5.84658	0	4.78404	15.7349	23.6471	63.3636	11.9083	25.8408	8.30392	22.3116	21.3418	30.9426	4.92813	7.03575	3.54315	13.3775	83.068	52.5939	8.82523	25.6719	0.261376	38.6351	0	27.5081	26.0008	20.1491	82.5048	35.7876	22.6039	89.1256	78.6834	38.3914	67.8315	9.81357	0	31.7151	1.06024	36.1312	60.2671	31.8925	40.8119	15.0712	18.2391
srna11844	TCCCTGAGACCCTAACTTGTGAAA	24	1	hsa-miR-125b-5p:1-21(1)	14.186	0	4.75884	0	0	2.29334	1.20721	9.50454	8.50591	1.66432	0	0	9.36287	6.59547	0.682357	0.40787	0	3.34437	5.42219	4.78126	10.2961	21.6377	0	8.79	0	6.43806	8.93778	0.347398	15.1065	0	2.3283	26.3767	11.9806	18.2718	13.3581	0	0	4.25446	0	2.65371	7.76447	6.74649	0.463772	4.38434	2.27989
srna1869	TCCCTGAGACCCTAACTTGTGA	22	1	hsa-miR-125b-5p:1-22(1)	1.66894	12.2303	23.7942	0	15.6569	31.9157	31.4585	65.2645	33.0029	31.7973	50.1769	49.0854	38.8972	59.0084	13.6471	15.703	10.6294	28.0927	31.1234	189.201	34.1242	80.3164	16.2053	13.6961	0	46.237	25.1883	31.6133	42.191	20.6879	10.6714	37.7604	27.523	55.842	58.6369	7.36018	172.771	44.8652	33.9276	23.8833	101.678	71.9626	74.6673	16.3043	25.9338
srna16290	TCCCTGAGACTCTAACTTGTGA	22	1	hsa-miR-125b-5p:1-22(1)	13.7688	6.98874	6.93432	81.3225	6.5237	1.91112	1.7043	10.455	1.8713	1.22634	7.24385	0.424982	4.61259	0.140329	0.416996	1.63148	60.2335	2.34106	0.433775	0	2.64757	0	7.57991	0	0	3.51167	0	1.38959	6.07836	4.28025	0.194025	2.7765	0	3.28483	12.1437	52.3391	0	14.6972	9.33009	9.39003	6.10066	3.06659	3.01452	0	0.569973
srna42958	CCCTGAGACCCTAACTTGTGA	21	1	hsa-miR-125b-5p:2-22(1)	0	0	0.679835	0	0.434913	0.31852	0.710123	5.70272	2.89201	3.59144	2.65019	1.69993	1.03267	1.75411	0.416996	0.40787	0	0.334437	1.95199	9.56253	2.05922	3.30067	0	0	0	0.390186	1.35421	0	0.893876	0.237792	1.94025	0.83295	0.9714	0.821207	0.86741	0	8.13038	5.80153	2.12047	1.63305	5.17632	4.90654	2.78263	0.548042	0.664969
srna9781	ATCCCACCGCTGCCAC	16	2	hsa-miR-1260a:1-16(1);hsa-miR-1260b:1-16(1)	9.17917	6.11514	7.47818	51.7507	0	7.77189	13.7054	12.6727	3.7426	5.78134	4.59366	0.424982	4.4749	15.0152	2.99479	1.22361	24.802	2.34106	13.6639	1.36608	1.76505	17.6036	5.75027	1.63535	46.6003	1.56074	5.41683	6.60057	0.715101	0	0.970123	4.9977	3.8856	20.1196	6.93928	9.81357	6.09778	1.16031	9.75418	5.71567	3.14276	0.408878	11.8262	4.11032	1.13995
srna1184	ATCCCACCGCTGCCACC	17	2	hsa-miR-1260a:1-17(1);hsa-miR-1260b:1-17(1)	52.9889	89.98	34.9435	81.3225	13.2648	42.618	47.7203	46.5722	29.7707	20.0595	28.092	39.5233	24.9906	153.45	18.8406	9.58494	698	40.4669	78.8387	78.5493	43.832	279.457	187.407	21.6684	706.771	37.0676	32.2302	5.21098	24.4922	8.4416	39.096	91.9021	147.653	121.128	32.9616	33.5297	217.488	25.9135	53.648	69.8129	69.3257	14.1063	61.2179	39.7331	29.4486
srna5364	TCCCACCGCTGCCACC	16	2	hsa-miR-1260a:2-17(1);hsa-miR-1260b:2-17(1)	7.093	34.0701	5.30271	110.894	2.82694	9.04597	8.80553	3.485	4.59319	6.4821	10.6008	8.49964	5.85179	27.5045	2.69152	1.73345	187.787	11.7053	13.8808	30.0537	11.1786	48.4099	40.7747	4.90605	50.4837	6.24297	4.33347	0	5.45264	1.42675	13.2907	2.49885	12.952	10.0598	15.6134	1.6356	107.728	1.93384	17.1758	7.96112	17.3776	1.0222	10.6668	8.35765	7.02967
srna4391	TCCCACCGCTGCCACCA	17	2	hsa-miR-1260a:2-18(1);hsa-miR-1260b:2-18(1)	14.186	17.4718	9.51769	118.287	0.869826	17.7097	14.8416	23.7613	24.3269	13.227	15.0177	19.5492	9.70709	21.1195	5.61049	4.9964	109.838	6.01987	31.6656	3.41519	10.0019	70.0476	14.8984	1.63535	81.5505	8.1939	7.04189	0	10.2796	13.673	4.7536	13.3272	20.7232	5.13254	9.71499	17.1738	54.8801	4.25446	43.6818	12.0437	40.4862	2.45327	12.9856	21.3737	10.2595
srna8660	CCCACCGCTGCCACCA	16	2	hsa-miR-1260a:3-18(1);hsa-miR-1260b:3-18(1)	3.33788	12.2303	2.31144	7.39295	0.434913	10.2563	6.10706	17.425	13.9497	4.99297	14.6644	4.46231	3.30454	11.9981	2.57779	0.815739	35.4315	32.7749	11.2782	36.884	11.1786	37.4076	6.27303	3.2707	73.7838	1.56074	6.22936	6.25317	4.46938	0.356687	1.94025	1.6659	2.5904	0.821207	3.64312	20.4449	16.2608	4.64123	11.2385	1.83718	11.6467	6.95093	9.27544	10.0018	1.51993
srna36687	ATCCCACCACTGCCACCA	18	1	hsa-miR-1260b:1-18(1)	0	0	0.679835	0	0.217457	2.80298	1.20721	1.26727	2.38165	0.175192	3.00355	0.849964	1.17036	1.68395	1.25099	1.63148	0	0.334437	5.31375	0.683038	6.17766	11.7357	0	0.817675	0	0.195093	0	0	0	0	0	0	0	0.615905	0.346964	0	2.03259	3.48092	5.51323	0	4.80658	2.65771	0.463772	3.8363	0.0949955
srna1134	ATCCCACCGCTGCCACCA	18	2	hsa-miR-1260b:1-18(1);hsa-miR-1260a:1-18(1)	81.3609	179.086	59.4176	436.184	27.3995	79.8211	42.5364	106.134	139.327	53.7839	63.0745	73.9469	48.2601	145.592	17.2106	29.6725	496.041	40.1325	81.3329	68.9868	97.3718	350.972	80.5038	31.2761	178.635	25.9473	16.2505	26.7497	14.4808	7.25264	19.1114	31.6521	133.729	69.3919	50.3098	90.7756	223.585	19.3384	118.11	78.9988	117.022	24.1238	62.1454	72.3416	49.4927
srna6203	ATCCCACCGCTGCCACCAT	19	1	hsa-miR-1260b:1-19(1)	14.6032	14.8511	12.237	44.3577	0.869826	30.6416	22.5819	21.2268	8.16567	9.98594	5.47706	2.12491	8.19251	3.71872	18.6511	5.50624	17.7157	2.6755	0.975995	15.7099	2.94174	29.7061	3.92064	0	0	0.195093	8.12525	7.29537	8.93876	7.84712	2.52232	7.2189	7.4474	12.7287	3.99009	0	0	5.41477	11.6626	0	29.2092	10.6308	4.8696	8.63167	7.21966
srna32438	TCGTACCGTGAGTAATAA	18	1	hsa-miR-126-3p:1-18(1)	0	0.873592	2.44741	0	0.217457	2.73927	2.05936	1.26727	1.02071	3.76663	1.41343	2.12491	1.58343	2.1751	1.63007	1.22361	0	0.334437	0.975995	0	2.3534	0.733483	0.522752	0.204419	0	0.780371	5.41683	1.38959	1.16204	1.18896	2.42531	1.6659	0.9714	1.64241	2.25527	0.817798	0	0.386769	0.212047	0	4.80658	3.88435	1.39132	1.37011	0.379982
srna10392	CTCGTACCGTGAGTAATAAT	20	1	hsa-miR-126-3p:1-19(1)	21.279	0	5.30271	0	0.434913	3.56742	7.74034	12.3559	2.38165	4.99297	9.71736	10.837	7.84829	6.10432	2.12289	1.22361	0	3.34437	12.2542	0	0.294174	0	4.18202	4.08837	0	2.92639	2.70842	2.43179	3.39673	1.66454	3.78348	10.8283	0.9714	4.92724	17.3482	0	0	0	4.0289	4.69502	11.4618	15.3329	2.31886	1.64413	5.22475
srna2996	TCGTACCGTGAGTAATAAT	19	1	hsa-miR-126-3p:1-19(1)	2.50341	12.2303	5.71061	0	3.69676	21.086	23.9312	33.8995	24.8372	27.5051	18.9047	19.9742	25.0594	38.9413	12.6236	8.25936	3.54315	2.00662	27.4363	0.683038	33.8301	22.3712	4.70477	26.9833	0	13.4614	21.1257	15.2855	36.4701	12.3652	33.7603	42.4804	11.9806	32.0271	74.9442	0.817798	0	4.25446	12.7228	2.04131	42.3349	24.9416	27.5944	11.0979	10.9245
srna2924	TCGTACCGTGAGTAATAATGAA	22	1	hsa-miR-126-3p:1-20(1)	8.3447	0	4.21498	0	0	24.9083	25.9195	46.2554	15.1405	38.7174	26.6786	41.2233	36.6253	29.1885	9.06018	13.9695	0	4.01325	31.7741	32.7858	14.1204	0	0	20.4419	0	25.9473	31.1468	27.0971	13.9445	2.7346	11.8355	36.0945	19.7518	22.7885	63.1475	0	0	13.1501	0.212047	6.94046	63.9645	42.7278	23.8842	11.3719	11.5895
srna3408	TCGTACCGTGAGTAATAATGA	21	1	hsa-miR-126-3p:1-20(1)	0	0	8.02205	0	0	21.6594	25.7775	39.6022	8.84614	18.6579	16.0778	27.8363	34.56	25.3996	9.28763	5.50624	0	1.00331	12.3626	0.683038	5.00097	23.1047	4.44339	30.254	3.88336	21.8504	18.9589	14.9381	14.5702	16.0509	10.5743	44.9793	28.1706	11.0863	53.259	0	0	2.32061	2.75662	0	46.402	41.5012	22.261	11.9199	11.6844
srna3845	CTCGTACCGTGAGTAATAATG	21	1	hsa-miR-126-3p:1-20(1)	0.417235	0	2.85531	0	4.78404	15.4164	21.5878	36.4341	14.2899	15.2417	27.562	24.649	32.9766	23.2245	6.70984	14.4794	3.54315	6.35431	12.9048	0.683038	6.76601	0.733483	5.22752	14.3093	0	12.2908	18.1464	35.4346	16.3579	18.3099	4.94763	30.5415	18.4566	24.8415	31.7472	0.817798	0	2.70738	17.3879	0.204131	26.9908	32.5058	11.3624	6.71352	5.50974
srna4757	TCGTACCGTGAGTAATAATGAAA	23	1	hsa-miR-126-3p:1-20(1)	0	0	5.98255	0	0	7.77189	15.1966	28.1968	8.33579	12.6138	11.1308	26.5614	21.273	20.3477	4.05623	5.3023	0	0	9.21773	0	12.6495	18.7038	0	11.243	0	20.0946	14.8963	24.3179	17.6987	0.356687	14.8429	40.2592	2.2666	7.39086	50.4833	0	0	3.48092	8.0578	9.39003	22.1842	23.3061	13.2175	0.959074	2.75487
srna266	TCGTACCGTGAGTAATAATG	20	1	hsa-miR-126-3p:1-20(1)	129.76	224.513	326.865	0	191.362	340.243	506.815	441.961	338.705	380.78	462.9	618.774	554.475	580.752	258.689	235.647	56.6903	70.9007	310.909	15.0268	217.101	232.881	150.553	430.506	11.6501	324.049	398.679	371.022	352.366	143.983	189.368	714.949	413.816	538.917	723.247	57.2459	121.956	218.524	360.481	109.618	615.982	535.631	407.655	208.804	180.966
srna43545	TCGTACCGTGAGTAATAATGT	21	1	hsa-miR-126-3p:1-20(1)	0	0	0.407901	0	0.65237	0.382224	2.34341	0	0.340236	2.1899	0.530038	3.61235	3.64876	2.1751	1.3268	0.713772	0	0.334437	0.433775	0	0	1.10022	0.522752	0.408837	0	0.390186	3.52094	0.694797	0.715101	0	0.582074	0.5553	0.6476	0.821207	4.16357	0	0	0	0	0	4.25197	1.63551	0.695658	0.411032	0.569973
srna43809	TCGTACCGTGAGTAATAATGAG	22	1	hsa-miR-126-3p:1-20(1)	0	0	0.135967	0	0	3.94965	1.91733	3.485	1.19083	1.31394	1.94347	2.76238	2.54725	1.54362	0.682357	0.203935	0	0	0.325332	0	0.294174	0.366741	0.261376	0.817675	0	0.390186	0	0.347398	0.536326	0.356687	0.873111	2.49885	1.9428	2.66892	3.29616	0	0	0.773538	0.212047	0.204131	2.77303	2.04439	1.6232	0.548042	0.569973
srna16206	TCGTACCGTGAGTAATAATGCAA	23	1	hsa-miR-126-3p:1-21(1)	0	0	4.07901	0	0	3.1215	4.33175	5.06909	3.57248	3.06586	1.59011	0.424982	6.40255	5.12201	0.644448	1.83541	0	0	0.108444	3.41519	0	0	6.5344	4.90605	0	4.09695	4.06263	9.37976	10.1902	0	2.23128	0.5553	0	0	3.8166	0	0	0	9.54213	3.87849	18.302	2.45327	3.94206	0	1.51993
srna604	TCGTACCGTGAGTAATAATGC	21	1	hsa-miR-126-3p:1-21(1)	73.8506	68.1402	99.6638	0	17.1791	222.9	240.803	295.274	160.081	165.556	154.241	191.242	213.694	176.885	194.131	96.6651	24.802	12.0397	68.645	1.36608	40.5961	48.4099	12.5461	81.3586	3.88336	54.0407	128.921	157.719	154.194	48.1528	74.5054	143.823	199.785	101.419	276.183	30.2585	46.7497	63.0433	91.6045	63.2807	336.091	259.025	161.161	59.8736	72.3866
srna11364	TCGTACCGTGAGTAATAATGCC	22	1	hsa-miR-126-3p:1-21(1)	0	0	0.135967	0	0	5.09632	14.4865	17.425	2.04142	10.2487	3.18023	6.79971	14.0443	6.94629	0.530722	2.75312	0	0	0.975995	0	0.294174	0	0	2.45302	0	5.4626	3.52094	1.0422	2.68163	0.475583	6.59684	8.05185	21.6946	9.44387	6.59232	1.6356	0	7.34861	1.06024	1.02066	9.42829	3.67991	12.29	4.79537	4.74978
srna2686	CTCGTACCGTGAGTAATAATGC	22	1	hsa-miR-126-3p:1-21(1)	10.8481	0	9.65366	0	1.95711	36.8209	33.3048	31.0482	24.3269	30.2206	30.9189	36.7609	34.8354	21.4704	35.1035	13.7656	0	1.33775	15.2906	0.683038	10.0019	22.0045	0.784128	16.5579	0	8.58408	12.7296	9.72716	33.431	1.90233	18.2383	50.8099	58.284	8.21207	56.0347	0.817798	0	0.386769	9.96623	0.408262	44.7382	38.2301	14.8407	2.32918	14.3443
srna2841	TCGTACCGTGAGTAATAATGCA	22	1	hsa-miR-126-3p:1-21(1)	0.83447	0.873592	9.10979	0	0	21.9779	25.4224	25.0286	20.7544	31.7973	22.6149	65.4472	51.9088	37.8889	7.99874	10.2987	0	0	20.1706	0	0	0	0.522752	30.4584	0	24.1915	37.1053	36.8242	26.9057	4.51804	25.8053	54.697	21.3708	21.5567	73.3829	0	0	0	10.8144	8.77764	47.8809	38.0257	14.145	7.94662	6.07971
srna11501	TCGTACCGTGAGTAATAATGCT	22	1	hsa-miR-126-3p:1-21(1)	0	0	0.679835	0	1.95711	7.38966	8.16642	12.6727	8.67602	14.103	4.77034	0.637473	7.22868	13.0506	3.98041	2.54918	0	6.35431	0	0	0.294174	0	0	7.35907	0	5.07241	0.270842	10.0746	3.66489	0	3.29842	7.2189	0.3238	2.46362	18.7361	0	0	0	0	2.24544	15.7138	12.8797	7.42035	0	3.32484
srna891	TCGTACCGTGAGTAATAATGCGA	23	1	hsa-miR-126-3p:1-22(1)	3.75512	22.7134	53.707	0	10.4379	92.8804	92.8841	119.44	64.6449	100.648	88.1629	110.92	98.6543	88.0566	39.6904	38.7476	0	9.69869	161.907	0.683038	85.899	117.357	50.9683	75.4305	3.88336	55.4064	77.7316	70.8693	117.634	34.8365	73.4383	145.211	124.663	105.525	272.367	26.9873	0	53.7609	65.9468	54.0948	171.188	131.454	89.0442	29.0462	42.938
srna83	TCGTACCGTGAGTAATAATGCG	22	1	hsa-miR-126-3p:1-22(1)	486.496	471.74	503.35	0	262.688	2676.59	2604.8	2168.94	1148.13	1569.02	1350.01	1640.01	1699.7	1551.97	2194.35	815.637	265.736	178.255	794.46	90.844	634.24	752.187	470.477	1079.54	100.967	783.493	1401.61	1409.4	1715.08	494.25	910.557	2025.73	1565.57	1851.41	2529.71	444.882	140.249	925.151	372.355	509.511	2632.9	1909.67	1556.42	585.309	621.271
srna12553	TCGTACCGTGAGTAATCATGCG	22	1	hsa-miR-126-3p:1-22(1)	3.33788	2.62078	4.35094	0	3.04439	2.67557	2.05936	4.11863	1.8713	1.48913	0.706717	0.424982	0.619602	0.631481	0.0758174	0	0	0	0.108444	0	0	0.366741	0	14.3093	0	10.9252	13.8129	19.4543	22.7938	0.475583	0.291037	0.83295	0.6476	1.02651	1.56134	1.6356	4.06519	9.28245	3.60481	5.30741	2.03355	1.0222	1.39132	0.274021	0.569973
srna40514	TCGTAACGTGAGTAATAATGCG	22	1	hsa-miR-126-3p:1-22(1)	3.33788	0.873592	0.543868	0	0.434913	0.254816	0.0710123	0.950454	0	0.087596	2.12015	1.27495	3.78645	2.24527	2.57779	1.12164	0	0.334437	0	0	0.588349	0	0	0.204419	0	0.780371	0.270842	0.694797	1.34081	1.54565	1.35817	4.16475	2.9142	3.90073	6.24535	0.817798	0	3.09415	0.84819	1.83718	0.184868	0	0	0.137011	0.0949955
srna33564	TCGTACCGTGCGTAATAATGCG	22	1	hsa-miR-126-3p:1-22(1)	0	0	0	0	0	11.5941	9.94173	5.70272	4.93343	6.39451	1.23675	1.48744	1.92765	1.1928	0.0379087	0	0	0	0.108444	0	0.588349	0.366741	0.261376	0.408837	0	0.195093	0.270842	0	0	0	0	0	0	0	0.520446	0	0	0	0.212047	0.408262	9.24342	5.7243	5.33338	2.46619	2.46988
srna20116	TCGTACTGTGAGTAATAATGCG	22	1	hsa-miR-126-3p:1-22(1)	0	0	0	0	0	5.92447	3.55062	5.70272	4.42307	4.90538	0.176679	0.424982	2.54725	4.49053	2.00916	1.12164	0	0	0.325332	0	0.294174	0	0	1.22651	0	0	3.52094	0.347398	10.0114	0.356687	3.39543	0.27765	12.6282	0.410603	0.173482	0	0	1.16031	0	4.08262	2.9579	1.83995	0	0.411032	0.569973
srna577	CTCGTACCGTGAGTAATAATGCG	23	1	hsa-miR-126-3p:1-22(1)	42.558	13.1039	39.4304	0	23.4853	351.965	278.581	178.052	70.9393	152.68	98.587	168.718	169.702	184.463	278.932	109.819	7.08629	35.1159	114.517	46.4466	79.4271	99.7537	33.1948	109.773	3.88336	82.3292	167.109	135.485	132.919	45.2993	76.8337	231.005	115.273	76.9881	189.963	0	14.2282	37.1298	48.7709	52.0534	270.463	186.04	221.219	35.3487	60.9871
srna40235	TCGTACAGTGAGTAATAATGCG	22	1	hsa-miR-126-3p:1-22(1)	0	0	0.135967	0	0.217457	6.49781	6.10706	4.43545	2.55177	3.41624	1.23675	0.849964	0.963825	0.91214	0.0758174	0.101967	0	0	0.975995	0	0.588349	0	0	0.613256	0	0	0.812525	0.694797	0.268163	0.237792	0.291037	0.5553	0	1.23181	1.21437	0.817798	0	0.773538	0.212047	1.02066	7.94934	4.90654	2.78263	1.2331	1.99491
srna1462	TCGTACCGTGAGTAATAATGCGT	23	1	hsa-miR-126-3p:1-22(1)	20.4445	0.873592	4.07901	0	4.13167	98.8049	69.3791	60.1954	50.5251	50.8933	39.5761	60.3475	32.9077	36.3453	84.309	30.2843	0	11.7053	53.3544	1.36608	15.5912	57.2117	18.2963	34.1379	0	29.2639	61.2102	35.0872	73.9236	14.2675	28.6186	27.2097	57.3126	40.4444	65.5762	2.45339	0	22.0458	14.8433	2.04131	76.5355	56.4252	30.6089	12.468	21.754
srna41224	CGTACCGTGAGTAATAA	17	1	hsa-miR-126-3p:2-18(1)	0.417235	0.873592	0.815802	0	0.65237	1.84742	1.63328	0.633636	0.850591	1.40154	1.59011	0.849964	0.826135	1.75411	1.63007	0.917707	0	0	1.51821	0	0.882523	2.93393	0.522752	3.06628	0	0.780371	0.541683	0.347398	0.983264	0.475583	0.679086	0	1.2952	1.23181	1.56134	0.817798	2.03259	0.773538	1.06024	0.612393	3.88224	1.83995	1.39132	1.50712	0.949955
srna10995	CGTACCGTGAGTAATAAT	18	1	hsa-miR-126-3p:2-19(1)	1.25171	3.49437	2.17547	0	0.869826	8.72745	6.03605	7.28681	3.57248	6.4821	7.95057	10.837	5.43872	6.94629	4.7765	2.95705	0	0.334437	4.87997	0	6.76601	6.60135	2.09101	3.88396	0	7.21843	10.292	3.47398	4.64816	1.90233	7.66397	6.6636	5.5046	10.2651	13.0112	0	0	1.16031	4.24095	3.06197	8.68882	5.92874	2.78263	2.74021	3.60983
srna801	CGTACCGTGAGTAATAATG	19	1	hsa-miR-126-3p:2-20(1)	8.3447	103.957	92.7295	0	58.2784	109.443	114.614	83.6399	68.7277	100.473	92.4032	147.894	145.4	156.257	104.439	52.2073	131.096	18.3941	81.4413	2.73215	126.495	67.1137	32.1493	73.1819	3.88336	52.8702	141.109	113.252	64.6272	38.6411	64.0281	166.312	94.5496	119.896	190.483	9.81357	75.206	58.7889	154.583	76.1409	149.374	133.09	100.638	41.2402	50.6326
srna10377	CGTACCGTGAGTAATAATGA	20	1	hsa-miR-126-3p:2-20(1)	0.417235	0	5.16675	0	0.217457	6.11558	7.95338	4.43545	6.12425	8.49681	7.95057	7.2247	5.57641	9.54238	2.69152	0.611804	3.54315	0	1.62666	0	0.882523	2.93393	6.01165	2.04419	0	7.21843	2.97926	19.4543	8.40244	3.56687	0.582074	13.0495	0.9714	0.410603	6.7658	0	0	4.25446	0	0	14.9743	8.38201	6.26092	5.06939	1.42493
srna7000	CGTACCGTGAGTAATAATGAA	21	1	hsa-miR-126-3p:2-20(1)	0.83447	0	0.407901	0	3.26185	13.9512	9.72869	10.7718	6.80472	12.1758	3.88694	7.64968	13.0805	7.99876	5.76212	4.18066	46.0609	0.334437	9.00084	2.73215	5.88349	10.6355	0	16.1491	0	5.26751	11.917	14.2433	12.6037	0.713375	6.79086	14.7154	12.952	7.39086	17.8686	0	0	0.386769	9.54213	0.204131	27.5454	10.4264	12.9856	1.2331	2.75487
srna3533	CGTACCGTGAGTAATAATGAAA	22	1	hsa-miR-126-3p:2-20(1)	24.6169	0	15.5002	0	5.65387	13.6327	20.3095	30.0977	2.72189	24.5269	33.2157	27.6238	21.0665	25.0488	5.04186	3.56886	0	0	18.0017	25.2724	0.294174	27.1389	11.5005	13.6961	0	32.3854	16.2505	11.4641	24.1347	8.4416	17.9473	29.7085	39.8274	26.6892	59.5043	0	0	5.028	16.1156	3.47023	29.2092	30.8703	8.34789	7.8096	7.88463
srna1156	CGTACCGTGAGTAATAATGC	20	1	hsa-miR-126-3p:2-21(1)	37.9684	62.8986	44.7331	0	15.222	95.3012	89.6886	121.975	50.8653	49.4917	65.9014	53.3352	79.9974	59.2891	108.646	38.5437	0	11.7053	41.8593	6.14734	20.0039	82.1501	14.8984	52.3312	0	52.8702	50.3766	48.9832	82.2366	21.5201	44.8197	78.8526	60.8744	83.3525	87.088	24.5339	2.03259	20.8855	38.3806	16.7388	141.979	78.9135	67.7107	20.1406	28.0237
srna28543	CGTACCGTGAGTAATAATGCC	21	1	hsa-miR-126-3p:2-21(1)	0	0	0.271934	0	0	1.84742	2.41442	3.16818	0.170118	0.087596	0	5.52477	2.96032	1.05247	2.72943	0.713772	0	0	0.216888	0	2.94174	16.5034	0	1.43093	0	3.12149	8.12525	0	0.625713	0	0.291037	2.7765	0	0	0	0.817798	0	0.773538	0	0.204131	0.739474	2.86215	1.85509	0.411032	0.189991
srna29313	CGTACCGTGAGTAATAATGCGG	22	1	hsa-miR-126-3p:2-21(1)	0.417235	0	0.271934	0	0.65237	2.35705	1.91733	0.950454	0.510354	1.83952	1.76679	2.3374	1.58343	1.96461	3.22224	1.83541	3.54315	1.00331	3.4702	0.683038	1.1767	1.10022	3.13651	2.24861	0	0.390186	3.79178	2.08439	2.59224	0.83227	1.5522	1.6659	1.2952	1.23181	4.68401	0	0	0.386769	0	0	2.9579	2.65771	1.85509	0.411032	0.379982
srna14384	CGTACCGTGAGTAATAATGCA	21	1	hsa-miR-126-3p:2-21(1)	0	0	0.271934	0	3.69676	3.1215	4.11872	3.485	3.23224	4.3798	2.29683	4.6748	11.3594	8.70041	1.66798	4.9964	3.54315	0	4.98842	0	5.29514	11.0022	0.261376	6.13256	0	0.585278	1.62505	6.94797	5.54203	0.356687	3.49244	1.6659	0.6476	6.56965	13.5316	0	0	2.70738	0.212047	0.816525	2.77303	7.56425	8.57978	3.01423	0.85496
srna43982	CGTACCGTGAGTAATAATGCT	21	1	hsa-miR-126-3p:2-21(1)	0	0	3.39917	0	0	0.95556	1.06519	0.316818	0.340236	1.13875	1.41343	9.5621	1.78996	2.1751	1.85753	0.815739	0	0.334437	0.108444	0	0	0	0	0.204419	0	0.195093	0	0.347398	2.05591	0	0.0970123	8.60715	0.3238	0.615905	0.520446	0	0	0.773538	0	0	2.21842	0.204439	0.231886	1.50712	1.23494
srna27333	CGTACCGTGAGTAATAATGCAA	22	1	hsa-miR-126-3p:2-21(1)	0.83447	0	0.135967	0	0	1.5926	2.20138	8.55408	0	7.62085	1.41343	0.212491	0.481912	1.26296	0.416996	0.509837	0	0	0.325332	0.683038	0	0.733483	0.522752	4.08837	0	0	6.77104	11.8115	5.98897	1.07006	2.42531	9.4401	0	0.410603	2.42875	0	0	0.386769	0.424095	0	5.36118	2.45327	2.08697	1.09608	0.284987
srna1202	CGTACCGTGAGTAATAATGCGA	22	1	hsa-miR-126-3p:2-22(1)	12.9343	7.86233	33.3119	0	18.4838	54.4032	51.768	72.8681	34.3639	55.5359	36.5726	66.9347	72.4934	66.937	44.6186	30.4883	24.802	19.0629	102.371	1.36608	61.7766	100.487	83.1176	52.1268	0	55.2113	78.8149	93.7976	60.6048	33.8853	37.5438	71.0784	83.8642	35.7225	138.092	28.6229	0	17.0178	30.5348	12.6561	87.9974	68.6916	51.7106	29.5943	13.1094
srna40181	CGTACAGTGAGTAATAATGCG	21	1	hsa-miR-126-3p:2-22(1)	3.33788	0.873592	1.76757	0	1.08728	2.29334	1.34923	0.316818	0.170118	0.700768	1.41343	1.06246	2.54725	1.75411	2.12289	1.22361	0	0	0.650663	0	0.294174	0	0.261376	1.02209	0	1.17056	0.812525	0.347398	0.625713	0.951166	1.35817	0.83295	1.9428	3.49013	3.46964	0.817798	4.06519	3.09415	2.75662	2.04131	1.29408	1.22664	0.231886	0.274021	0.189991
srna112	CGTACCGTGAGTAATAATGCG	21	1	hsa-miR-126-3p:2-22(1)	877.028	890.19	746.867	44.3577	315.747	1782.31	1727.87	1476.37	745.117	851.959	874.739	1099.43	1185.44	1075.55	1853.36	666.663	315.34	214.709	567.161	126.362	664.54	769.423	337.437	883.498	62.1338	802.807	991.552	878.223	1138.44	421.248	566.552	1414.9	1230.12	1282.11	1608.87	435.886	170.738	737.955	540.297	624.437	1580.63	1247.28	1107.26	378.56	401.736
srna20206	CGTACCGTGAGTAATACTGCG	21	1	hsa-miR-126-3p:2-22(1)	5.00682	1.74718	4.07901	0	1.30474	3.05779	1.49126	3.16818	0.850591	1.22634	0	0.849964	0.344223	0.210494	0.151635	0	0	0	0.108444	0	0.294174	0	0	8.79	0	6.82825	8.39609	6.94797	10.9947	0	0	1.38825	0.3238	0.821207	0.346964	1.6356	0	4.64123	3.39276	4.69502	1.66382	2.65771	0.927544	0.685053	0.569973
srna560	CGTACCGTGAGTAATAATGCGT	22	1	hsa-miR-126-3p:2-22(1)	33.3788	83.8648	80.9004	0	36.5327	233.603	229.086	221.456	162.633	176.769	158.305	188.267	165.984	143.767	283.481	126.847	3.54315	40.1325	176.33	21.1742	160.031	104.888	61.162	135.734	3.88336	88.7672	141.379	169.878	220.877	65.2738	145.615	149.098	73.1788	99.1607	288.674	31.0763	69.1082	114.87	48.3468	18.3718	281.555	226.314	150.262	60.1477	71.6266
srna10715	CGTACCGTGCGTAATAATGCG	21	1	hsa-miR-126-3p:2-22(1)	13.3515	24.4606	12.9169	0	4.34913	51.1543	27.7658	22.1773	12.5887	13.5774	0.706717	1.06246	0.963825	0.91214	0.151635	0	0	0	0.433775	0	0.882523	0.733483	0	0	0	0	0.541683	0	0.0893876	1.78344	0.970123	1.6659	0	0.821207	1.9083	9.81357	0	12.3766	11.0265	12.6561	26.4362	23.9194	20.6378	7.26156	6.83968
srna35084	CGTACCGTGAGGAATAATGCG	21	1	hsa-miR-126-3p:2-22(1)	0.417235	0	0.407901	0	0	2.42075	3.97669	3.80182	1.8713	1.48913	1.94347	2.76238	2.6161	2.03477	2.95688	1.63148	3.54315	0.334437	1.7351	0	0.588349	1.83371	0.784128	0.204419	0	0.390186	0.812525	0.694797	0.446938	0.118896	0.291037	1.6659	0.3238	0.205302	0.693928	0.817798	0	1.16031	0.212047	1.02066	3.5125	2.86215	2.08697	0.685053	0.664969
srna29804	CGTACTGTGAGTAATAATGCG	21	1	hsa-miR-126-3p:2-22(1)	0	0	0.135967	0	0	2.29334	2.69847	0	0.340236	1.22634	0.706717	0.212491	0.275378	4.63086	3.10851	2.03935	0	0	6.94041	0	4.41262	0	0.261376	0	0	1.17056	0	1.0422	1.69836	2.02123	2.61933	9.9954	0	0.205302	0.693928	0	0	0	0	2.85784	2.9579	1.83995	0.231886	0	0.949955
srna7908	GTACCGTGAGTAATAATG	18	1	hsa-miR-126-3p:3-20(1)	2.08618	6.98874	7.07028	0	4.56659	8.53634	11.717	8.8709	6.63461	7.97124	8.65728	10.4121	15.1458	9.89321	8.6811	6.42395	0	0.668875	7.37418	0	6.47184	3.66741	3.39789	5.11047	0	5.85278	7.85441	6.25317	6.07836	3.32908	3.88049	16.3813	9.0664	8.82797	11.9703	0	4.06519	8.50892	10.3903	3.67436	18.1171	9.81308	8.81166	3.8363	3.98981
srna11676	GTACCGTGAGTAATAATGC	19	1	hsa-miR-126-3p:3-21(1)	3.33788	5.24155	2.99127	0	1.5222	6.3704	8.66351	8.55408	4.59319	6.39451	7.77389	7.0122	6.95331	5.82366	7.80919	2.03935	0	1.00331	2.27732	0.683038	2.94174	5.13438	0.261376	3.06628	0	2.14602	4.06263	6.25317	5.63142	1.07006	4.46257	9.4401	4.5332	5.13254	6.41883	2.45339	2.03259	3.09415	1.69638	2.85784	16.4533	5.7243	4.8696	1.78114	1.99491
srna25137	GTACCGTGAGTAATAATGCGA	21	1	hsa-miR-126-3p:3-22(1)	0	0	1.2237	0	0.434913	2.48446	1.77531	2.85136	1.8713	2.71548	3.00355	2.12491	2.96032	1.82428	0.758174	1.01967	0	0.668875	4.33775	0	3.53009	3.30067	4.18202	2.04419	0	1.75584	5.41683	2.08439	2.32408	0.475583	0.776098	1.38825	1.9428	2.66892	4.8575	0	0	1.16031	1.90843	1.63305	2.21842	1.0222	2.55074	0.685053	1.04495
srna1560	GTACCGTGAGTAATAATGCG	20	1	hsa-miR-126-3p:3-22(1)	32.9616	13.9775	23.9302	7.39295	13.4823	66.5707	72.7166	70.0168	34.1937	41.1701	45.5832	44.8356	53.4234	45.0457	63.5729	24.1663	3.54315	8.36094	32.0994	45.0805	26.1815	36.3074	19.0805	35.16	11.6501	32.3854	43.0638	37.8664	52.8281	12.603	19.4995	65.803	44.3606	51.5307	60.5452	10.6314	4.06519	41.771	20.1445	31.6403	79.1237	48.0432	40.58	16.8523	18.7141
srna38686	TAGTACCGTGAGTAATAATGCG	22	1	hsa-miR-126-3p:3-22(1)	6.25853	3.49437	8.29399	0	3.26185	1.08297	0.994173	0.950454	0	0.700768	1.76679	2.12491	1.92765	1.61379	1.40262	0.815739	0	0	0.867551	0	0.588349	1.83371	1.0455	0.817675	0	0	0.270842	0	0.536326	0	0.0970123	1.38825	0.9714	0	1.04089	3.27119	2.03259	18.5649	5.30119	7.14459	0.924342	0.817757	1.39132	0.685053	0.284987
srna13761	GTACCGTGAGTAATAATGCGT	21	1	hsa-miR-126-3p:3-22(1)	1.66894	0	0.679835	0	0	7.51707	7.03022	7.60363	3.40236	3.76663	5.1237	5.52477	4.75028	3.43806	7.01311	3.05902	0	2.34106	5.20531	0	5.00097	2.93393	2.87514	2.24861	0	2.53621	3.79178	2.43179	6.25713	1.30785	4.55958	4.72005	2.9142	3.49013	5.89839	0	0	5.028	1.06024	0	7.39474	5.7243	2.31886	1.50712	2.84987
srna23838	TACCGTGAGTAATAATG	17	1	hsa-miR-126-3p:4-20(1)	2.50341	11.3567	10.1975	0	6.5237	1.78371	3.19556	3.485	1.19083	2.36509	1.59011	2.12491	1.92765	2.73642	2.27452	1.22361	0	0.334437	2.81954	0.683038	2.05922	1.46697	1.82963	0.204419	0	1.56074	1.89589	2.77919	1.87714	1.30785	0.582074	2.2212	1.619	1.64241	3.12268	0.817798	0	6.96184	12.5108	4.08262	3.88224	3.67991	1.6232	1.64413	0.664969
srna40233	TACCGTGAGTAATAATGC	18	1	hsa-miR-126-3p:4-21(1)	2.92065	1.74718	3.39917	0	1.08728	1.08297	2.55644	2.53454	1.02071	1.31394	1.59011	1.06246	2.06534	1.12263	1.2889	0.917707	0	0	1.40977	0	0.294174	0.733483	0	0.408837	0	0.390186	0.812525	1.38959	1.16204	0.356687	0.582074	1.1106	0.9714	0	0.86741	0	4.06519	2.70738	4.66504	3.2661	2.40329	1.83995	1.15943	0.685053	0.474978
srna6379	TACCGTGAGTAATAATGCG	19	1	hsa-miR-126-3p:4-22(1)	17.1066	19.219	20.9389	0	12.6125	15.8623	15.0546	14.8904	7.82543	7.79604	10.0707	8.92462	8.81211	9.33189	11.0314	4.48657	0	0.668875	8.35018	3.41519	7.94271	6.2346	6.79578	6.13256	0	6.04788	5.14599	7.29537	9.56447	2.49681	3.88049	12.2166	10.0378	7.80146	12.3172	10.6314	4.06519	32.4886	13.7831	19.8007	16.2684	11.653	8.11601	3.97331	3.60983
srna35068	CCTACCGTGAGTAATAATGCG	21	1	hsa-miR-126-3p:4-22(1)	3.33788	1.74718	2.31144	0	3.04439	3.2489	2.20138	0.950454	0.680472	0.963556	2.65019	6.37473	4.95681	3.99938	0.0758174	0	0	0	0.867551	0	2.3534	2.20045	0.522752	0.613256	0	0.390186	0.541683	1.0422	0.983264	0	0	0	0	0.410603	0	6.54238	2.03259	4.25446	2.54457	4.28675	3.32763	2.24883	1.6232	0.548042	0.569973
srna46024	CATACCGTGAGTAATAATGCG	21	1	hsa-miR-126-3p:4-22(1)	0.83447	0.873592	1.49564	0	0.217457	1.84742	1.06519	0.316818	0.170118	0.613172	1.76679	1.27495	1.44574	1.26296	2.80524	0.611804	0	0	0.650663	0	0.882523	1.10022	1.56826	1.02209	0	1.17056	0	3.47398	1.34081	0.237792	0.0970123	1.1106	2.5904	0.821207	1.04089	0.817798	0	1.93384	1.48433	1.63305	1.29408	1.83995	0.927544	0.685053	0.284987
srna31793	TCCTACCGTGAGTAATAATGCG	22	1	hsa-miR-126-3p:4-22(1)	1.66894	2.62078	2.0395	0	0.65237	3.05779	1.91733	1.26727	1.70118	1.66432	5.65374	6.79971	5.64526	7.50761	0	0	0	0	0.867551	0	0.294174	1.83371	0	0.613256	0	0.390186	0.541683	0.347398	0.536326	0	0.0970123	0	0	0	0.346964	1.6356	0	5.80153	1.06024	1.63305	2.21842	1.63551	2.08697	0.274021	0.474978
srna20989	ACCGTGAGTAATAATG	16	1	hsa-miR-126-3p:5-20(1)	4.58959	4.36796	10.1975	0	7.61098	2.67557	1.84632	4.11863	2.38165	2.89067	2.47351	2.12491	3.09801	3.29774	2.04707	2.03935	7.08629	1.00331	1.40977	0	1.76505	2.56719	1.30688	3.67954	3.88336	1.17056	3.79178	3.47398	2.94979	1.07006	1.16415	5.553	2.2666	2.66892	4.8575	1.6356	2.03259	5.80153	11.8747	5.30741	4.43684	2.45327	2.08697	1.2331	1.13995
srna42624	CGCACCGTGAGTAATAATG	19	1	hsa-miR-126-3p:5-20(1)	0	0.873592	0.407901	0	0.217457	1.21038	1.42025	0.950454	0.680472	1.48913	4.41698	7.43719	5.16335	6.10432	0	0	0	0	1.30133	0	1.76505	0.366741	0.261376	0.204419	0	0	0	0.347398	0.35755	0	0.0970123	0	0.3238	0.205302	0	0	0	0.773538	1.48433	1.22479	1.47895	2.45327	1.6232	0.274021	0.474978
srna43121	CGGACCGTGAGTAATAATG	19	1	hsa-miR-126-3p:5-20(1)	0.83447	0	1.08774	0	0.217457	1.01926	2.05936	2.85136	0.680472	1.22634	3.18023	4.03733	5.23219	4.98169	0.0379087	0	0	0	1.40977	0	1.76505	0.366741	0.784128	0.817675	3.88336	0.390186	0	1.0422	0.268163	0.118896	0	0	0	0	0	0	0	0	0.212047	0	1.10921	2.45327	1.39132	1.09608	0.474978
srna29700	ACCGTGAGTAATAATGC	17	1	hsa-miR-126-3p:5-21(1)	2.50341	5.24155	3.12724	0	0.65237	2.80298	1.98835	2.85136	1.70118	1.57673	3.35691	2.76238	2.75378	1.40329	1.66798	1.12164	0	0.334437	1.19288	0	1.1767	2.56719	0.261376	1.02209	0	1.36565	1.62505	2.08439	1.87714	0.356687	2.3283	2.49885	2.2666	2.25832	3.64312	1.6356	0	1.54708	3.60481	2.44957	4.99145	1.43107	2.08697	0.959074	0.949955
srna34027	GCACCGTGAGTAATAATGCG	20	1	hsa-miR-126-3p:5-22(1)	2.92065	0.873592	1.2237	0	0.65237	2.35705	1.91733	0.633636	1.36094	1.13875	4.41698	3.82484	4.81912	4.3502	0.189544	0	0	0	0.867551	0	0.294174	1.83371	1.56826	0.408837	0	1.36565	0.812525	0.347398	1.16204	0	0	0.83295	0	0	0.173482	0.817798	0	1.16031	1.27228	1.83718	4.43684	2.24883	1.6232	0.959074	0.664969
srna4293	ACCGTGAGTAATAATGCG	18	1	hsa-miR-126-3p:5-22(1)	27.9548	25.3342	24.2021	0	10.6554	22.2327	18.1792	17.7418	9.01626	11.4751	7.59721	13.5994	12.9428	12.2788	17.8929	6.52591	7.08629	3.00994	10.3022	3.41519	11.1786	9.53528	5.22752	13.4916	3.88336	9.55955	20.584	14.5907	17.6987	5.707	8.34306	19.4355	15.2186	22.3779	27.4102	22.0805	0	37.9034	22.9011	22.2503	22.554	8.38201	14.145	5.75445	5.41474
srna40175	GAACCGTGAGTAATAATGCG	20	1	hsa-miR-126-3p:5-22(1)	3.33788	0	1.08774	0	0.65237	1.33778	1.63328	1.90091	0.680472	1.22634	4.2403	2.97487	3.71761	3.57839	0.151635	0	0	0	1.19288	0.683038	0.882523	4.4009	1.0455	0.613256	0	0.585278	0.541683	0.347398	1.60898	0	0.0970123	0	0	0	0.173482	2.45339	0	3.09415	1.06024	1.02066	1.10921	0.408878	1.6232	0.137011	0.0949955
srna12278	CGGACCGTGAGTAATAATGCG	21	1	hsa-miR-126-3p:5-22(1)	1.66894	0	0.679835	0	0.434913	9.5556	7.03022	6.33636	3.7426	4.02942	11.8375	15.9368	15.6966	13.6119	0.265361	0.203935	0	0	4.55464	0	2.64757	8.80179	2.09101	3.2707	0	1.56074	2.43758	2.77919	4.11183	0	0.0970123	0	0	0	0.693928	0.817798	0	1.16031	0	1.02066	7.76447	5.51986	7.65223	1.50712	2.27989
srna32190	TCGGACCGTGAGTAATAATGCG	22	1	hsa-miR-126-3p:5-22(1)	0.417235	0	0.951769	0	0.65237	9.68301	10.7229	8.55408	3.91272	6.39451	0.353358	0.212491	0.89498	0.561317	0.341178	0.101967	0	0	0.542219	0	0.294174	0.733483	0.522752	0.204419	0	0	0	0.347398	0.0893876	0	0.485062	0.5553	1.9428	1.02651	1.56134	0	0	0	0.424095	0.816525	11.4618	6.13318	6.26092	1.64413	2.1849
srna8558	CGCACCGTGAGTAATAATGCG	21	1	hsa-miR-126-3p:5-22(1)	8.76194	13.1039	7.75012	0	3.91422	13.3141	10.4388	14.2568	3.40236	6.5697	18.9047	22.0991	29.4655	22.5228	0.227452	0.101967	0	0	5.42219	0	3.23592	5.86786	2.09101	3.67954	0	1.95093	2.97926	4.51618	3.48612	0.118896	0	0	0.3238	0.205302	0.173482	6.54238	0	3.48092	2.75662	5.71567	10.5375	7.15537	9.27544	2.87722	1.99491
srna34407	GGACCGTGAGTAATAATGCG	20	1	hsa-miR-126-3p:5-22(1)	1.66894	1.74718	2.71934	0	0.65237	2.99409	2.69847	2.21773	1.70118	2.01471	3.18023	2.76238	3.02916	2.31543	0.113726	0	0	0	2.60265	0	2.94174	2.20045	1.56826	0.817675	3.88336	1.36565	1.62505	0.347398	1.96653	0	0	0.5553	0	0.821207	0	0.817798	0	3.48092	1.27228	1.02066	2.21842	2.04439	1.39132	0.548042	0.664969
srna19462	CGAACCGTGAGTAATAATGCG	21	1	hsa-miR-126-3p:5-22(1)	5.00682	4.36796	2.99127	0	1.73965	4.90521	4.0477	2.53454	2.38165	2.54028	7.77389	12.7495	11.2905	9.54238	0.379087	0.101967	0	0	2.38577	0	1.47087	2.20045	0.784128	1.22651	0	1.17056	0.812525	1.73699	2.1453	0	0.194025	0.5553	0	0.615905	0.693928	0	0	3.86769	3.18071	2.85784	2.03355	2.24883	1.85509	0.548042	0.569973
srna21306	CCGTGAGTAATAATG	15	1	hsa-miR-126-3p:6-20(1)	6.25853	13.1039	22.8425	0	14.1347	1.5289	1.63328	1.90091	1.02071	0.43798	3.53358	4.03733	3.16685	3.71872	1.55426	0.815739	0	0	2.81954	0	1.76505	0.733483	0.784128	2.45302	0	0.975464	2.43758	1.73699	1.34081	0.713375	0.679086	1.38825	1.2952	6.98026	1.56134	3.27119	2.03259	19.7252	20.3566	6.5322	2.21842	0.817757	1.15943	0.822064	0.284987
srna37844	CCGTGAGTAATAATGC	16	1	hsa-miR-126-3p:6-21(1)	6.67576	6.11514	9.24576	0	1.73965	1.27408	1.77531	2.53454	0.340236	0.613172	1.94347	1.48744	1.92765	1.75411	0.568631	0.40787	0	0.334437	1.40977	0	0.294174	0.366741	0	0.613256	0	1.36565	1.62505	1.38959	1.34081	0.118896	0.776098	0.5553	0.3238	0.410603	1.21437	4.90679	2.03259	2.32061	6.57347	3.67436	2.58816	1.83995	0	0.274021	0.284987
srna26018	CGTTCCGTGAGTAATAATGCG	21	1	hsa-miR-126-3p:6-22(1)	0	1.74718	1.35967	0	0.434913	2.73927	3.05353	2.53454	1.53106	1.13875	3.88694	8.28715	5.02566	6.38498	0.227452	0.101967	0	0	1.51821	0.683038	0	1.46697	0.261376	0.817675	0	1.17056	2.16673	0.694797	1.96653	0	0	0	0	0	0	0.817798	0	1.93384	0.84819	0.816525	1.84868	3.27103	1.6232	0.548042	0.569973
srna5721	CCGTGAGTAATAATGCG	17	1	hsa-miR-126-3p:6-22(1)	37.1339	36.6909	36.8471	0	20.006	8.34522	10.7229	6.01954	4.42307	5.60614	11.8375	10.6246	12.8051	12.2086	11.7138	2.44722	0	1.00331	10.0853	2.04911	5.29514	7.33483	4.18202	12.0607	7.76672	5.4626	7.58357	8.33756	10.7265	2.02123	5.23866	6.6636	8.4188	7.18556	8.6741	26.9873	6.09778	66.5243	26.5059	34.0899	8.87369	7.35981	8.34789	2.87722	2.27989
srna7580	CGTGAGTAATAATGCG	16	1	hsa-miR-126-3p:7-22(1)	20.4445	18.3454	16.8599	0	10.6554	9.04597	5.82301	9.18772	1.53106	11.5627	7.95057	7.0122	12.1855	6.52531	10.6903	3.67083	0	3.00994	9.97684	1.36608	5.88349	4.76764	3.13651	4.90605	0	3.31658	6.22936	6.60057	10.6371	3.92356	1.45518	12.2166	9.714	4.72194	5.03098	13.0848	6.09778	40.9975	18.4481	15.7181	6.84013	6.54206	5.33338	2.6032	1.23494
srna14933	GTGAGTAATAATGCG	15	1	hsa-miR-126-3p:8-22(1)	14.6032	5.24155	9.78962	0	6.5237	3.75854	3.97669	2.85136	2.89201	2.62788	3.88694	3.61235	4.95681	3.99938	2.08498	1.12164	0	0.668875	3.36176	1.36608	3.53009	1.46697	1.56826	6.74582	0	2.7313	2.97926	5.90577	7.86611	1.66454	1.64921	2.7765	2.2666	4.51664	3.8166	0.817798	0	11.9898	12.0867	7.75698	3.5125	1.83995	2.08697	1.2331	1.04495
srna9316	CATTATTACTTTTGG	15	1	hsa-miR-126-5p:1-15(1)	4.17235	0.873592	3.67111	0	0.869826	6.62522	5.53896	7.60363	2.89201	5.51855	8.4806	5.94975	8.26135	7.64794	5.42095	2.44722	0	0.668875	1.19288	0	1.1767	0.733483	1.56826	9.40326	0	7.41353	6.22936	9.03236	10.9947	2.97239	2.3283	10.273	4.2094	6.15905	14.2255	0.817798	2.03259	0.386769	1.27228	1.22479	8.13421	12.8797	4.63772	1.78114	2.56488
srna12064	CATTATTACTTTTGGT	16	1	hsa-miR-126-5p:1-16(1)	4.17235	0.873592	5.30271	0	2.17457	2.93038	2.69847	2.21773	1.53106	3.06586	4.77034	4.03733	3.16685	2.66625	2.72943	1.32558	0	1.67219	0.108444	0	0	0.733483	0.261376	11.6519	0	7.02334	6.77104	9.37976	7.68733	2.7346	3.10439	8.60715	3.238	9.23857	13.3581	0	2.03259	1.54708	2.96866	2.04131	8.13421	4.90654	1.15943	1.64413	1.32994
srna32754	CATTATTACTTTTGGTCCGC	20	1	hsa-miR-126-5p:1-16(1)	2.08618	1.74718	2.99127	0	0.869826	0.254816	0.710123	0.316818	0.170118	0.350384	0.706717	1.27495	0.550757	0.631481	0	0	0	0	0.108444	0	0.588349	0	0	4.29279	0	2.7313	6.22936	7.29537	7.59795	0	0.0970123	0.5553	0.6476	0.615905	0.86741	1.6356	0	1.54708	1.69638	0.204131	0.739474	0.408878	0.463772	0	0
srna30002	CATTATTACTTTTGGTCCG	19	1	hsa-miR-126-5p:1-16(1)	1.25171	0	2.31144	0	1.30474	0.31852	0.497086	0.950454	0.170118	0.525576	0.353358	0	0.137689	0.420988	0	0.101967	0	0	0	0	0.294174	0	0	11.8563	0	6.82825	13.5421	9.72716	8.49182	0.237792	0.0970123	0.27765	0	0.410603	0.520446	0	2.03259	2.70738	1.27228	1.02066	0.924342	0.204439	0	0	0.284987
srna10584	CATTATTACTTTTGGTA	17	1	hsa-miR-126-5p:1-17(1)	0.83447	1.74718	1.90354	0	0.65237	4.58669	3.83467	4.11863	2.55177	4.4674	13.781	11.262	11.4971	5.47284	8.11246	4.18066	0	2.00662	2.7111	0.683038	2.05922	2.93393	0.784128	6.74582	0	1.75584	3.52094	3.82138	3.39673	2.7346	4.7536	9.71775	2.9142	10.0598	11.9703	0	0	0.386769	0.636142	0.408262	9.79803	7.97313	3.2464	1.37011	1.51993
srna10732	CATTATTACTTTTGGTATGCG	21	1	hsa-miR-126-5p:1-17(1)	5.84129	3.49437	6.66238	0	0.65237	5.03262	5.82301	4.43545	2.04142	4.55499	6.00709	7.0122	10.2578	7.15679	5.6484	3.67083	0	0.668875	2.92798	0	11.4728	1.46697	1.0455	6.74582	0	3.31658	10.0211	3.47398	6.5253	1.66454	3.9775	7.7742	4.857	8.82797	11.6233	0	2.03259	3.48092	3.18071	2.65371	8.13421	13.493	2.31886	1.50712	2.0899
srna7088	CATTATTACTTTTGGTAAGCG	21	1	hsa-miR-126-5p:1-17(1)	2.08618	0.873592	1.90354	0	0.65237	9.4919	11.9301	4.43545	4.42307	11.4751	9.18732	12.962	15.077	11.086	14.7465	8.25936	0	1.67219	2.7111	0	2.3534	2.93393	1.0455	2.45302	0	1.36565	1.89589	3.82138	3.03918	4.51804	6.49982	27.765	10.0378	26.4839	34.176	1.6356	0	0.773538	0.424095	0.816525	12.5711	15.5374	7.88412	2.87722	4.84477
srna11520	CATTATTACTTTTGGTAGGCG	21	1	hsa-miR-126-5p:1-17(1)	0.417235	0.873592	0.679835	0	0	2.22964	4.33175	1.26727	1.02071	2.36509	9.01064	5.52477	8.88095	5.61317	6.33076	2.54918	0	0.668875	1.40977	0	1.1767	1.10022	1.56826	0.408837	0	0.390186	0.541683	1.0422	1.34081	3.68577	6.79086	23.8779	14.571	20.9408	29.8389	0	0	0	0.636142	0.408262	2.21842	4.49766	0.927544	0.411032	1.13995
srna2360	CATTATTACTTTTGGTAC	18	1	hsa-miR-126-5p:1-18(1)	12.5171	13.1039	13.7327	0	4.78404	22.5512	25.7065	15.8409	14.6302	18.5704	48.9401	62.0474	45.644	31.2934	31.3505	20.6994	7.08629	10.3676	9.86839	0	8.23689	5.86786	13.3302	27.8009	0	15.4123	28.1675	28.1393	35.0399	11.7707	12.7086	59.4171	13.5996	57.4845	54.1264	1.6356	0	3.09415	18.024	4.69502	45.4776	37.8213	13.9132	5.48042	7.31466
srna11410	CATTATTACTTTTGGTACACG	21	1	hsa-miR-126-5p:1-18(1)	12.9343	0	4.35094	0	1.5222	4.33187	5.25491	1.90091	0.850591	3.32865	7.42053	6.37473	7.7106	4.70103	4.89022	2.34525	0	0.334437	5.74753	0	2.94174	4.03416	2.35238	4.49721	0	5.4626	4.33347	2.77919	5.98897	1.78344	4.46257	10.8283	4.857	11.4969	15.6134	0.817798	0	1.54708	1.48433	2.04131	3.5125	5.92874	2.31886	1.91815	1.80491
srna19860	CATTATTACTTTTGGTACGTG	21	1	hsa-miR-126-5p:1-19(1)	4.17235	3.49437	4.35094	0	0.65237	2.22964	1.63328	0.316818	1.36094	3.41624	5.47706	4.6748	4.95681	4.49053	3.33597	1.12164	0	0.334437	0.542219	0	0	0.733483	8.36403	1.43093	0	1.17056	1.89589	3.47398	2.32408	0.951166	1.35817	2.49885	0.6476	5.54314	6.7658	0	4.06519	1.16031	4.66504	1.02066	1.66382	6.13318	0.695658	0.822064	1.04495
srna35186	CATTATTACTTTTGGTACGAG	21	1	hsa-miR-126-5p:1-19(1)	0.417235	1.74718	0.679835	0	0.434913	0.700744	0.852148	0.316818	0.340236	0.525576	3.88694	2.97487	4.95681	3.50823	2.23661	0.713772	0	0.334437	0.650663	0	0.294174	1.10022	1.0455	1.02209	0	0.780371	0.812525	1.38959	0.715101	1.42675	0.0970123	2.2212	0.3238	1.23181	0.86741	0	0	0.386769	0.636142	0.204131	0.554605	2.24883	0.231886	0.411032	0.474978
srna23636	CATTATTACTTTTGGTACGGG	21	1	hsa-miR-126-5p:1-19(1)	0	0	0.815802	7.39295	0.65237	0.63704	1.7043	0.950454	0.170118	0.87596	6.18377	8.28715	9.22518	7.22695	2.95688	1.52951	0	0.668875	0.867551	0	0.294174	0	0	0.817675	7.76672	0.780371	1.35421	1.73699	1.25143	0.475583	0.679086	0.83295	0.6476	2.66892	3.29616	0.817798	0	1.16031	0.212047	0.204131	1.66382	1.22664	1.15943	0.274021	0.664969
srna8151	CATTATTACTTTTGGTACGA	20	1	hsa-miR-126-5p:1-19(1)	0	0	9.38172	0	0	4.7141	6.46212	6.96999	3.91272	3.06586	4.2403	9.77459	11.6347	9.1214	2.88106	1.83541	0	0	1.84355	0	0	14.3029	0	9.60768	3.88336	5.26751	13.5421	22.2335	11.6204	0.118896	5.04464	30.2638	0.9714	6.77495	47.0136	0	0	0	3.39276	4.49089	10.1678	4.90654	4.40583	4.24733	1.70992
srna208	CATTATTACTTTTGGTACG	19	1	hsa-miR-126-5p:1-19(1)	140.608	65.5194	296.544	14.7859	215.717	293.421	466.551	309.531	371.198	405.482	690.462	856.976	827.581	691.753	356.077	485.875	0	49.4967	287.376	3.41519	194.449	121.391	209.624	855.083	19.4168	514.655	637.561	742.043	501.822	267.634	290.261	955.116	340.961	800.06	1159.55	28.6229	101.63	170.952	180.452	85.7351	538.522	810.806	314.437	189.075	261.713
srna16409	CATTATTACTTTTGGTACGCT	21	1	hsa-miR-126-5p:1-20(1)	10.4309	0	0.407901	0	3.04439	2.42075	7.4563	4.11863	3.23224	0.613172	9.71736	8.92462	4.88797	4.77119	3.98041	5.81214	0	0.334437	0.759107	0	0.294174	0.733483	4.70477	4.49721	0	2.7313	0	2.08439	4.46938	3.44798	2.23128	4.16475	0	2.66892	5.20446	0.817798	0	0.386769	0	0.816525	10.7224	3.88435	0.695658	0.274021	0.85496
srna27057	CATTATTACTTTTGGAACGC	20	1	hsa-miR-126-5p:1-20(1)	0	0	0.135967	0	0.217457	2.80298	3.83467	3.485	1.19083	3.15346	4.06362	1.91242	3.02916	2.1751	2.35034	1.32558	0	0.334437	0.975995	0	0	0.366741	0.261376	1.43093	0	1.56074	1.35421	1.0422	1.87714	0.475583	0.776098	4.16475	0.9714	4.92724	4.16357	0	0	0	0	0	6.10066	4.08878	1.15943	0.685053	0.85496
srna219	CATTATTACTTTTGGTACGC	20	1	hsa-miR-126-5p:1-20(1)	307.085	150.258	298.719	14.7859	100.465	397.386	523.148	289.888	213.328	384.634	887.283	678.484	862.141	584.471	415.176	227.591	0	32.106	139.025	6.83038	134.144	81.4166	76.5832	357.937	7.76672	221.235	401.117	463.43	544.817	175.966	217.211	648.59	365.246	694.125	1054.6	76.873	26.4237	98.2393	145.04	173.307	747.423	749.679	212.176	120.569	157.978
srna3395	CATTATTACTTTTGGTACGCGG	22	1	hsa-miR-126-5p:1-20(1)	5.42406	2.62078	9.51769	0	3.26185	13.7601	19.3864	12.0391	12.4186	21.1106	24.3817	27.8363	33.5273	26.6625	21.0014	13.4597	0	2.34106	12.0373	1.36608	10.5903	11.7357	2.87514	17.58	0	13.6565	14.8963	23.9705	25.6542	6.18258	12.2236	29.1532	7.1236	25.0468	65.7497	0.817798	0	2.32061	6.99757	3.87849	23.1086	33.1192	13.9132	4.52135	8.35961
srna24767	CATTATTACTTTTGGTACGCC	21	1	hsa-miR-126-5p:1-20(1)	0.417235	9.60951	1.76757	0	0.217457	1.14667	4.18973	0.316818	0.510354	4.55499	5.47706	3.61235	7.7106	2.66625	1.40262	1.63148	0	0.334437	0.216888	0	0	0	0	1.02209	3.88336	0.780371	1.62505	1.0422	5.45264	0.356687	0.679086	1.1106	0.3238	1.23181	2.25527	8.17798	2.03259	5.028	0.212047	0.816525	1.84868	5.7243	2.55074	0.137011	0.284987
srna2107	CATTATTACTTTTGGTACGCA	21	1	hsa-miR-126-5p:1-20(1)	12.9343	6.98874	23.7942	0	4.13167	25.8001	34.37	18.6923	22.9659	25.578	33.7457	34.636	52.6661	41.8181	47.2343	22.7387	0	1.67219	14.423	0	5.29514	6.96809	12.0233	34.3423	0	22.4357	33.3135	33.6977	37.0959	7.60933	17.7533	45.2569	19.1042	51.736	78.2404	1.6356	0	5.028	12.7228	15.7181	34.3855	40.0701	16.232	8.76868	14.4393
srna5244	CATTATTACTTTTGGTACGCGAA	23	1	hsa-miR-126-5p:1-21(1)	20.0273	2.62078	12.1011	0	5.65387	7.8993	10.1548	6.01954	4.08283	10.5115	9.18732	25.7114	27.0559	13.9628	5.2314	1.93738	0	0	0.108444	0	0	0	4.70477	11.4474	0	6.63316	2.97926	15.6329	7.68733	2.61571	2.81336	22.212	0.6476	25.6627	58.6369	0	0	13.9237	0	7.75698	25.5118	33.7325	5.10149	0.548042	3.89482
srna9373	CATTATTACTTGTGGTACGCG	21	1	hsa-miR-126-5p:1-21(1)	10.4309	7.86233	14.1406	7.39295	4.78404	3.37631	6.81718	2.53454	2.89201	2.54028	9.54068	9.77459	11.1528	6.7358	32.6015	17.5384	0	2.00662	2.92798	0	2.64757	1.46697	3.13651	2.45302	0	0.975464	1.35421	4.16878	4.20122	1.07006	1.64921	1.6659	2.5904	2.87422	4.8575	3.27119	0	3.86769	3.18071	5.71567	3.5125	6.33762	1.39132	0.685053	2.1849
srna10088	CATTATTACTTATGGTACGCG	21	1	hsa-miR-126-5p:1-21(1)	21.6962	7.86233	26.2416	0	7.61098	0.828152	0.568099	0	0.170118	0	6.53713	8.07466	9.91362	6.38498	34.2316	20.0876	0	1.33775	0.650663	0	0.588349	0.366741	1.56826	1.63535	0	0.975464	1.62505	3.82138	2.32408	1.18896	2.61933	3.8871	2.5904	5.54314	7.11276	3.27119	4.06519	8.12215	7.20961	8.98177	0.369737	1.0222	0	0.274021	0.379982
srna27256	CATTATTACTTCTGGTACGCG	21	1	hsa-miR-126-5p:1-21(1)	3.33788	1.74718	6.39045	0	7.61098	0.828152	1.1362	0.950454	0.680472	2.01471	1.94347	2.76238	5.02566	1.96461	5.95167	3.16099	0	0	0.325332	0	0	0.733483	0	0.613256	0	0.390186	1.08337	1.0422	0.983264	2.7346	1.64921	1.6659	0.3238	0.821207	3.64312	0	0	1.54708	2.33252	3.06197	0.739474	1.22664	0.231886	0.274021	0.189991
srna21895	CATTTTTACTTTTGGTACGCG	21	1	hsa-miR-126-5p:1-21(1)	32.1271	22.7134	30.0487	7.39295	14.787	0.700744	1.1362	0.316818	0.510354	0.700768	3.18023	4.24982	4.54374	3.15741	1.44053	1.01967	0	0	0.542219	0	0.882523	0.733483	1.0455	0.613256	0	0.975464	1.89589	3.47398	1.78775	0.118896	0.194025	1.38825	0	1.43711	1.73482	7.36018	4.06519	14.6972	10.8144	12.6561	0.924342	2.86215	0.231886	0.548042	0.379982
srna13582	CATTATTACTTTTGGTACGCGCT	23	1	hsa-miR-126-5p:1-21(1)	0	0	0	0	0	8.85486	3.55062	5.3859	7.14496	4.55499	5.30038	9.98708	11.8413	3.01708	10.804	6.32198	0	0	0	0	0	0	0	1.02209	0	0	0	3.47398	5.89958	0	0.776098	0	0	0.205302	2.60223	0	0	0.773538	0	0	12.2013	10.222	6.4928	1.64413	2.84987
srna44012	CATTATTACTTTTGGTACGCGTT	23	1	hsa-miR-126-5p:1-21(1)	0	0	0.135967	0	0	2.29334	1.98835	0	0	4.55499	0	0.212491	2.06534	0	3.07061	0.305902	0	0	0	0	0	0	0	0	0	0	0	0	2.59224	0	0	0	0	0	0.173482	0	0	0	0.212047	0	1.84868	5.7243	0	0	2.1849
srna18425	CATTATTACGTTTGGTACGCG	21	1	hsa-miR-126-5p:1-21(1)	2.08618	4.36796	3.53514	0	0.65237	6.11558	8.30844	5.70272	2.21154	3.94182	0.353358	0	0.137689	0.0701646	4.70068	2.54918	0	0.334437	6.61508	0.683038	4.11844	4.4009	3.65926	2.86186	0	1.36565	3.2501	4.16878	4.11183	0	0	0	0	0.615905	0.520446	0.817798	0	0.386769	1.06024	0.816525	6.10066	10.6308	5.10149	2.19217	3.22985
srna12906	CATTATTACATTTGGTACGCG	21	1	hsa-miR-126-5p:1-21(1)	3.33788	1.74718	2.99127	0	0.434913	9.42819	12.0011	6.01954	3.91272	10.1611	0.530038	2.12491	0.963825	0.491152	7.54383	3.46689	0	0	10.5191	0	9.11941	8.43505	6.01165	3.2707	0	2.53621	3.2501	3.82138	5.54203	0.237792	0.0970123	0.27765	0	1.23181	1.56134	0	0	1.54708	1.06024	1.42892	14.9743	19.2173	5.10149	3.69929	3.41984
srna243	CATTATTACTTTTGGTACGCGA	22	1	hsa-miR-126-5p:1-21(1)	403.466	95.2215	347.124	133.073	140.477	235.768	389.503	268.978	226.767	486.508	609.543	662.122	784.484	640.112	242.388	171.305	0	35.7848	239.986	34.8349	197.979	230.68	63.253	412.926	3.88336	273.52	426.576	528.393	519.253	144.458	194.607	678.576	262.278	783.842	1291.4	60.517	50.8149	126.087	192.751	145.954	681.795	796.291	272.002	107.827	165.387
srna38336	CATTATTACTTTTGGTTCGCG	21	1	hsa-miR-126-5p:1-21(1)	0.83447	0	0.135967	0	0	1.40149	2.98252	3.80182	0.170118	1.48913	0.176679	0.849964	0.344223	0.77181	0.492813	0.203935	0	0	0.216888	0	0	0	0.261376	2.86186	0	2.34111	2.97926	0.694797	4.29061	0.594479	0.776098	1.38825	0	1.23181	2.25527	0	0	0	0.212047	0	2.03355	4.7021	0.695658	0.548042	1.42493
srna7711	CATTATTACTTTTGGTGCGCG	21	1	hsa-miR-126-5p:1-21(1)	2.50341	0.873592	3.26321	7.39295	1.30474	7.26226	10.0838	4.11863	3.40236	7.79604	3.71026	5.09978	3.57992	2.87675	3.37388	1.63148	0	0.334437	1.30133	0	1.47087	0.366741	0.261376	15.3314	0	11.7056	10.0211	19.8017	22.6151	2.37792	3.78348	12.2166	9.0664	10.881	15.7869	0.817798	2.03259	1.16031	0.636142	0.816525	8.87369	16.9685	5.33338	3.28825	3.70483
srna19518	CATTATTACTTTTGGTACGCGTA	23	1	hsa-miR-126-5p:1-21(1)	11.2653	0	4.75884	0	1.30474	2.73927	5.96504	0	6.63461	5.78134	0	0	2.06534	4.49053	2.88106	1.12164	0	0.334437	3.14487	0	0	0	0	0.613256	0	0.390186	1.89589	17.7173	0.446938	0	1.26116	13.6048	10.0378	0	4.51053	0	0	0	0	0	2.40329	7.15537	0.927544	0	0.0949955
srna18221	CATTATTACTTTTAGTACGCG	21	1	hsa-miR-126-5p:1-21(1)	0.417235	0.873592	0.271934	0	0	2.42075	3.05353	0.633636	1.19083	3.15346	1.41343	0.637473	1.99649	0.77181	7.61965	4.18066	0	1.00331	0.759107	0	0	1.10022	0.522752	5.11047	0	2.92639	5.14599	8.33756	9.20692	0.237792	0.194025	0.5553	0.9714	0.821207	1.73482	0	0	0.386769	0	0.612393	3.5125	4.29322	1.85509	1.50712	1.42493
srna16840	CATTATGACTTTTGGTACGCG	21	1	hsa-miR-126-5p:1-21(1)	3.33788	1.74718	4.21498	0	0.869826	8.72745	9.7997	3.80182	4.08283	6.39451	0.176679	0.424982	0	0.0701646	0.0379087	0	0	0	4.87997	0	3.23592	2.93393	2.61376	2.04419	0	2.14602	2.97926	3.82138	4.64816	1.30785	2.13427	7.7742	3.5618	8.21207	6.7658	0.817798	0	1.93384	1.06024	1.02066	10.1678	16.1507	4.17395	2.46619	3.41984
srna10633	ACATTATTACTTTTGGTACGCG	22	1	hsa-miR-126-5p:1-21(1)	0	0	3.94304	51.7507	0	6.75262	4.33175	9.18772	0	5.16816	9.18732	0.849964	12.8739	11.3667	5.57258	0.917707	0	0	0	0	0	0	0	6.13256	0	0	7.85441	0.347398	12.3355	0	0	9.16245	0	25.4574	28.9715	0	0	3.09415	4.0289	12.452	9.42829	11.4486	5.33338	0.411032	2.94486
srna10705	CATTCTTACTTTTGGTACGCG	21	1	hsa-miR-126-5p:1-21(1)	1.66894	0.873592	1.90354	7.39295	0.65237	0.127408	0.213037	0.950454	0.340236	0.613172	2.82687	2.3374	3.71761	2.59609	0.720266	0.101967	0	0	0	0.683038	0.294174	0	0	16.9668	0	12.681	19.2298	25.7075	24.5816	0	0.0970123	0	0	0	0.173482	1.6356	0	1.16031	0.84819	1.22479	0.369737	0.817757	0	0	0.284987
srna13154	CNTTATTACTTTTGGTACGCG	21	1	hsa-miR-126-5p:1-21(1)	0	0	0.951769	0	0	2.93038	5.32593	2.53454	2.04142	3.15346	5.30038	4.03733	6.47139	3.15741	6.40657	2.34525	0	0	1.84355	0	2.05922	2.20045	1.30688	4.70163	0	4.09695	5.68768	7.99016	7.32978	1.42675	2.81336	9.4401	2.9142	9.23857	12.1437	0	0	0	0.636142	0.408262	5.73092	8.58645	2.08697	1.50712	1.51993
srna12469	CATTATTAATTTTGGTACGCG	21	1	hsa-miR-126-5p:1-21(1)	43.3925	17.4718	70.2949	0	14.1347	1.08297	2.48543	1.90091	0.340236	1.48913	2.12015	1.91242	2.06534	1.68395	1.55426	0.917707	0	0	1.7351	0	0.294174	0.733483	1.30688	4.08837	0	1.95093	3.79178	8.33756	3.12857	1.54565	1.26116	6.1083	2.9142	3.69543	6.7658	7.36018	2.03259	23.5929	14.2072	30.0073	2.21842	1.63551	1.39132	0.822064	0.379982
srna7475	CATTATTACTTTTGATACGCG	21	1	hsa-miR-126-5p:1-21(1)	13.7688	6.98874	14.9564	0	4.34913	1.97482	3.40859	2.21773	0.850591	1.31394	6.89049	11.0495	12.7363	6.59547	1.13726	0.305902	0	0.334437	4.12087	0	3.53009	3.30067	1.56826	12.0607	0	6.63316	10.0211	12.5063	16.8943	3.09129	8.63409	19.7131	9.3902	20.1196	21.6853	0	0	4.64123	5.72528	4.69502	2.58816	2.45327	0.463772	0.274021	1.61492
srna19742	CATTATTACTTTTTGTACGCG	21	1	hsa-miR-126-5p:1-21(1)	2.50341	0.873592	3.39917	0	1.5222	1.72001	4.54479	1.90091	1.02071	2.62788	2.65019	2.97487	2.68494	1.54362	4.09414	3.26296	0	0.668875	0.867551	0	1.1767	1.10022	0.784128	5.92814	0	2.14602	2.43758	4.51618	4.46938	0.475583	3.49244	3.05415	1.2952	1.84771	2.77571	0	0	2.32061	0.424095	1.22479	2.21842	6.33762	1.6232	0.548042	1.23494
srna4721	CATTGTTACTTTTGGTACGCG	21	1	hsa-miR-126-5p:1-21(1)	124.336	61.1514	99.7998	7.39295	51.9721	6.49781	9.58667	2.85136	4.93343	6.92008	24.2051	20.1866	26.0921	19.3654	8.07456	3.87476	0	1.33775	17.8932	1.36608	20.0039	19.4373	13.3302	3.47512	0	2.92639	4.06263	5.55838	4.55877	0.356687	0.388049	3.05415	2.2666	1.84771	2.08178	18.8094	12.1956	52.2138	41.7733	48.7873	11.4618	16.9685	6.4928	2.32918	4.65478
srna1062	CATTATTACTTTTGGTCCGCG	21	1	hsa-miR-126-5p:1-21(1)	159.384	65.5194	158.538	22.1789	61.1053	13.6964	22.0848	5.06909	6.80472	12.6138	3.35691	8.71213	6.60908	7.36728	0.416996	1.83541	0	0.334437	0.216888	0	0.882523	0	0	198.899	3.88336	128.761	214.236	278.266	359.07	2.7346	5.43269	11.6613	7.7712	10.6757	25.1549	37.6187	18.2934	56.855	64.2504	74.712	14.2349	25.7593	3.94206	4.24733	4.84477
srna20015	CATTATAACTTTTGGTACGCG	21	1	hsa-miR-126-5p:1-21(1)	5.42406	0.873592	5.03078	0	1.73965	5.98818	7.66933	6.33636	4.25295	6.5697	0.176679	0.424982	0.619602	0.561317	0.151635	0	0	0	3.90398	0	3.82427	1.46697	1.82963	1.83977	0	1.17056	1.08337	1.38959	2.8604	1.54565	1.64921	6.1083	1.2952	5.54314	7.98017	0	0	1.16031	1.27228	1.02066	9.42829	14.3107	5.10149	2.74021	2.56488
srna39051	CATTATTCCTTTTGGTACGCG	21	1	hsa-miR-126-5p:1-21(1)	3.75512	1.74718	3.94304	0	1.5222	0.891856	2.34341	0.316818	0.850591	1.40154	2.47351	0.424982	1.2392	0.841975	2.04707	1.52951	0	0	0.650663	0	0.882523	0.366741	0	0.817675	0	0.195093	1.08337	1.0422	1.4302	0.951166	0.291037	2.7765	0.9714	2.25832	2.94919	0	0	1.16031	1.27228	2.44957	1.84868	3.67991	0.463772	0.822064	0.759964
srna28732	CATTATTACTTTTGCTACGCG	21	1	hsa-miR-126-5p:1-21(1)	2.08618	0	3.12724	0	0.869826	0.573336	0.994173	0.633636	0	0.525576	2.47351	2.97487	2.89147	2.03477	0.568631	0.203935	0	0	0.542219	0	1.47087	0	1.0455	2.04419	0	2.34111	2.16673	3.82138	2.94979	0.951166	1.94025	5.83065	1.619	2.87422	4.33705	0	0	0.773538	0.212047	1.83718	0	1.43107	0.231886	0.274021	0.379982
srna15156	CATTATTACTTTAGGTACGCG	21	1	hsa-miR-126-5p:1-21(1)	0.83447	0.873592	1.76757	0	0.217457	2.73927	3.40859	2.21773	0.680472	3.24105	9.364	13.5994	15.3523	10.8053	7.31638	5.20034	0	1.00331	3.57865	0	2.05922	2.56719	1.56826	0.408837	0	0.585278	0.541683	2.08439	0.983264	0.356687	0.388049	1.1106	0.3238	1.02651	0.693928	0	0	0.386769	0.212047	0.612393	3.14276	4.7021	0.695658	0.959074	0.664969
srna31811	CATTATCACTTTTGGTACGCG	21	1	hsa-miR-126-5p:1-21(1)	1.66894	0.873592	2.44741	0	0.65237	1.91112	4.0477	0.950454	1.02071	4.64259	1.41343	1.48744	3.16685	0.841975	1.2889	0.611804	0	0	1.95199	0	1.47087	6.60135	1.0455	1.02209	0	0.585278	1.08337	1.0422	2.05591	0.356687	0.582074	2.2212	0.6476	2.87422	2.08178	0	0	0.386769	0.424095	0.408262	2.03355	4.49766	1.15943	1.2331	1.32994
srna42342	CATTAGTACTTTTGGTACGCG	21	1	hsa-miR-126-5p:1-21(1)	0	0	0.407901	0	0	0.191112	0.213037	0	0	0.175192	0	0	0.0688446	0.140329	0.0379087	0	0	0	0	0	0	0	0	0	0	0	0	0	0	3.68577	3.10439	8.60715	4.857	9.85448	11.2763	0	0	0.386769	0	0	0.184868	0.204439	0	0	0
srna23195	CATTATTACTCTTGGTACGCG	21	1	hsa-miR-126-5p:1-21(1)	0.417235	0.873592	6.25448	0	0.217457	4.33187	4.0477	0.950454	0.680472	4.02942	4.06362	0.637473	9.15633	1.89444	1.97125	1.01967	0	0	0.759107	0	0.588349	0.733483	0.522752	1.22651	0	0.390186	0.812525	10.7694	1.16204	0.713375	2.71634	4.16475	0.6476	2.87422	2.77571	0	0	0.773538	1.90843	8.36938	2.77303	5.11098	0.695658	1.78114	1.23494
srna17352	CATTATTACTGTTGGTACGCG	21	1	hsa-miR-126-5p:1-21(1)	2.08618	1.74718	3.67111	0	0.434913	5.03262	9.08958	4.11863	2.04142	5.43095	0.353358	0	0.275378	0.210494	3.14642	1.63148	0	0.334437	5.31375	0.683038	1.47087	2.20045	2.35238	0.204419	0	0	0.270842	0	0.0893876	3.44798	4.55958	13.0495	6.476	12.5234	15.7869	0	0	1.54708	0.636142	0.612393	7.20987	14.9241	5.10149	1.64413	2.1849
srna26634	CATTATTAGTTTTGGTACGCG	21	1	hsa-miR-126-5p:1-21(1)	11.6826	5.24155	13.5967	0	4.78404	0.382224	0.92316	0	0	0.525576	0.176679	1.06246	1.10151	0.561317	1.06144	0.101967	0	0	1.19288	0	0.882523	0	0.784128	2.86186	0	1.95093	2.70842	4.51618	3.93305	1.42675	1.06714	5.83065	1.2952	2.66892	5.20446	4.08899	0	6.96184	2.75662	5.10328	0.369737	0.204439	0.463772	0	0
srna9384	CATTATTATTTTTGGTACGCG	21	1	hsa-miR-126-5p:1-21(1)	5.42406	1.74718	22.2986	0	1.73965	5.98818	13.2793	4.11863	8.16567	5.78134	8.83396	10.1996	16.0408	7.50761	4.54905	2.85509	0	0	0.759107	0	0.294174	1.46697	1.0455	0.408837	0	2.34111	3.79178	3.12659	9.11754	0.475583	0.970123	2.49885	1.619	18.6824	11.6233	1.6356	0	15.4708	1.27228	12.452	6.10066	13.2886	4.63772	4.38434	3.51483
srna6492	CATTATTACTTTTGGGACGCG	21	1	hsa-miR-126-5p:1-21(1)	2.08618	0.873592	2.44741	0	1.08728	3.37631	5.53896	2.21773	1.53106	2.89067	7.24385	5.52477	10.189	7.29712	15.8458	9.381	0	1.00331	1.19288	0	0	0	0.784128	11.4474	0	6.82825	13.2712	17.0225	20.6485	3.68577	7.858	22.4896	13.9234	20.9408	36.4312	0.817798	0	0.773538	0.212047	1.42892	5.91579	7.76869	1.15943	1.2331	1.51993
srna20554	CATTATTACTTTCGGTACGCG	21	1	hsa-miR-126-5p:1-21(1)	2.08618	0	2.31144	0	0.217457	3.1215	2.76948	1.90091	0.680472	1.57673	4.94702	4.88729	9.08749	6.7358	3.07061	2.85509	0	0.334437	0.759107	0	0	0.366741	0.261376	5.72372	0	2.14602	1.62505	0.694797	2.41347	0.83227	0.291037	8.3295	1.619	2.87422	2.94919	0	0	0.773538	0.636142	0.408262	6.84013	4.29322	1.39132	0.548042	0.949955
srna3564	CATTATTACCTTTGGTACGCG	21	1	hsa-miR-126-5p:1-21(1)	47.5648	1.74718	25.9697	0	26.0948	16.563	16.8299	10.455	10.2071	22.775	37.8094	33.1486	46.4701	19.7864	6.93729	3.16099	0	0.334437	2.38577	0	2.94174	1.83371	1.82963	4.70163	3.88336	10.1448	13.5421	12.8537	27.5314	4.28025	24.5441	1.6659	14.2472	34.696	26.3693	0.817798	0	30.168	11.0265	12.6561	11.6467	22.6928	8.11601	12.742	10.4495
srna5796	CATTATTACTTTTGGAACGCG	21	1	hsa-miR-126-5p:1-21(1)	0.83447	0.873592	3.67111	0	0.869826	8.53634	13.8474	8.23727	4.25295	9.28518	7.06717	7.2247	10.189	8.06893	17.9308	9.89084	0	1.00331	2.06043	0	0.588349	1.83371	0.784128	6.95024	3.88336	8.97427	12.7296	16.6751	16.6261	4.75583	7.858	20.2684	12.6282	26.4839	30.7063	0.817798	0	0	0.636142	0.408262	11.6467	21.0572	4.17395	3.28825	2.27989
srna15050	CATTATTACTTTGGGTACGCG	21	1	hsa-miR-126-5p:1-21(1)	0.83447	0	1.08774	0	0.217457	3.1215	2.98252	1.26727	0.850591	2.71548	12.3675	11.687	17.3488	12.5595	5.76212	3.26296	0	0	3.14487	0	4.11844	1.83371	1.56826	0.408837	0	0.195093	0.270842	0.694797	0.446938	0.237792	0.194025	1.1106	1.2952	0	0.693928	0	0	0	0.424095	0.612393	2.40329	5.51986	1.6232	0.411032	0.759964
srna757	CATTATTACTTTTGGTACGCGT	22	1	hsa-miR-126-5p:1-21(1)	65.9232	46.3004	38.4787	22.1789	8.69826	151.87	158.073	75.7195	61.2425	123.598	86.7495	93.0711	135.555	89.53	243.905	96.971	7.08629	6.01987	22.231	0.683038	24.1223	16.8701	3.92064	102.823	0	47.7977	69.8772	126.106	179.937	21.8768	52.7747	139.936	52.7794	85.4055	217.026	25.3517	2.03259	47.9593	5.51323	9.1859	96.3165	193.195	53.3338	31.7865	37.7132
srna15229	CATTATTACTTTGGTACGCG	20	1	hsa-miR-126-5p:1-21(1)	4.58959	0	3.12724	0	0.869826	4.39558	2.98252	1.26727	5.27366	3.50384	4.94702	2.76238	9.84478	8.63024	4.43532	1.01967	0	0	1.08444	0	0	0	0.522752	2.45302	0	1.75584	4.60431	2.77919	4.64816	5.35031	1.74622	5.83065	2.5904	5.74845	3.8166	0	0	7.34861	1.06024	10.2066	5.54605	4.08878	0.695658	1.91815	0.569973
srna10	CATTATTACTTTTGGTACGCG	21	1	hsa-miR-126-5p:1-21(1)	18053.3	9089.73	21064	2240.06	6547.4	16001.9	22110.8	10499.3	8261.11	15255.3	22129.1	25513.2	30918.4	22257.1	23232.1	12224.3	396.832	1168.86	5181.67	209.01	4186.1	3859.59	3152.72	16190	625.221	10046.3	16643.8	22291.2	24024.6	6775.99	8877.89	27633.7	12967.2	29672.7	40449.8	2879.47	1800.88	6805.59	6193.48	8184.03	19579.6	31049.2	9553.47	5137.49	7093.7
srna44407	CATTACTACTTTTGGTACGCG	21	1	hsa-miR-126-5p:1-21(1)	1.25171	1.74718	0.815802	0	0.217457	1.33778	1.84632	0	0.340236	0.788364	1.06008	1.27495	1.44574	1.54362	1.13726	0.917707	0	0	0.108444	0	0.588349	0.733483	0	0.613256	0	0.780371	0.270842	0.694797	1.25143	0.475583	0.679086	3.60945	0.9714	3.90073	3.29616	0	0	0	0.424095	0.204131	1.84868	1.43107	0.463772	0	0.664969
srna5522	CATTATTACTTTTGGCACGCG	21	1	hsa-miR-126-5p:1-21(1)	3.33788	3.49437	8.02205	7.39295	2.60948	8.15411	14.4865	7.92045	4.25295	9.54796	8.65728	9.34961	12.5986	9.75288	20.1674	9.58494	0	1.00331	2.92798	0	1.1767	1.46697	1.56826	9.40326	0	7.02334	11.6462	13.8959	16.3579	4.39914	6.20879	25.5438	8.7426	21.1461	27.0632	0.817798	0	1.54708	1.90843	1.22479	11.8316	16.764	4.63772	3.8363	1.61492
srna3321	CATTATTACTTTTGGTACGCGC	22	1	hsa-miR-126-5p:1-21(1)	18.7756	0	8.97382	0	1.73965	27.4564	22.5109	13.6232	13.7796	22.0742	17.4912	22.3116	32.0127	15.9975	40.0695	16.0089	0	2.00662	6.83196	0	11.767	0	0	22.4861	0	2.34111	17.8756	12.8537	25.3861	2.8535	15.1339	37.2051	6.7998	13.5499	60.0248	0	0	10.056	0	0	28.4697	32.3014	11.1305	4.93238	6.74468
srna14414	CATTATTACTATTGGTACGCG	21	1	hsa-miR-126-5p:1-21(1)	1.25171	0.873592	4.35094	0	1.08728	10.8297	12.9953	6.33636	3.40236	9.89835	1.06008	1.27495	0.826135	0.631481	5.49676	2.65115	0	0.334437	4.4462	0	4.11844	3.66741	2.35238	0.408837	0	0.780371	0.812525	0.347398	0.804488	2.97239	3.58946	11.6613	4.857	7.39086	11.9703	0	0	1.54708	0.84819	0.612393	10.9072	18.3995	5.79715	1.64413	4.65478
srna32378	CATTAATACTTTTGGTACGCG	21	1	hsa-miR-126-5p:1-21(1)	2.08618	0	0.679835	0	0	0.445928	0.568099	0.633636	0	0.525576	1.41343	1.27495	1.03267	0.701646	1.13726	0.305902	0	0.334437	0.542219	0	0.294174	0	0.261376	0.613256	0	0	0.541683	1.0422	1.07265	1.90233	1.64921	14.1601	4.5332	8.62267	13.5316	0.817798	0	0	0.424095	0.408262	1.29408	0.817757	0.463772	0.137011	0.0949955
srna27577	CATTATTACTTTTGGTACGCGAT	23	1	hsa-miR-126-5p:1-21(1)	4.17235	0.873592	0.271934	0	0	1.91112	2.62746	1.90091	4.08283	2.54028	1.59011	9.77459	2.27187	2.31543	4.32159	1.63148	0	0	0.216888	0	0.294174	0.366741	6.27303	3.2707	0	0.195093	0	0.694797	0.35755	0	0.388049	0	0	8.62267	1.04089	0	0	16.6311	0	0.204131	2.77303	4.29322	0.463772	0.548042	0.189991
srna8238	CATTATTACTTTTGTTACGCG	21	1	hsa-miR-126-5p:1-21(1)	20.4445	13.1039	30.5926	14.7859	9.35063	2.73927	4.6158	0.633636	1.02071	2.36509	1.59011	2.3374	3.8553	2.24527	1.02354	0.917707	0	0.334437	1.7351	0	0.882523	1.83371	1.0455	18.8065	0	10.9252	20.0423	26.4023	27.442	0.356687	1.35817	1.38825	1.2952	2.05302	1.9083	4.08899	6.09778	8.89569	6.14938	8.98177	3.14276	4.29322	0.695658	1.09608	1.13995
srna29845	CATTATTACTTTTGGTACGCGAAA	24	1	hsa-miR-126-5p:1-21(1)	3.75512	17.4718	0	0	0	2.67557	0.355062	8.8709	0	1.13875	10.2474	7.64968	0.206534	5.47284	1.55426	0.305902	0	0	0	0	0	0	0	0.204419	0	0	0	0	1.87714	0	2.03726	0	0	0	0.86741	0	0	0	0	0	1.47895	7.35981	0	0	1.42493
srna10842	CATTATTGCTTTTGGTACGCG	21	1	hsa-miR-126-5p:1-21(1)	9.17917	6.11514	9.10979	0	2.82694	6.56151	10.7229	2.85136	3.7426	4.90538	2.82687	1.69993	2.54725	2.66625	10.2733	7.03575	0	1.00331	1.08444	0	0	0	0.522752	6.13256	0	3.51167	6.77104	12.5063	10.4584	2.25902	1.94025	5.27535	2.5904	6.36435	11.6233	1.6356	2.03259	1.54708	4.66504	4.08262	10.3526	11.653	2.55074	1.2331	2.84987
srna20683	ATTATTACTTTTGGTAC	17	1	hsa-miR-126-5p:2-18(1)	1.66894	0	2.99127	0	1.08728	2.54816	2.69847	0.633636	1.70118	2.54028	6.18377	6.16224	5.78295	4.28004	1.13726	0.815739	0	0	1.08444	0	1.1767	0.733483	0.522752	3.2707	0	2.14602	2.70842	3.12659	1.87714	0.951166	0.970123	3.05415	1.619	4.10603	4.51053	0.817798	2.03259	2.32061	1.69638	0.612393	4.80658	3.06659	2.55074	0.274021	1.23494
srna3397	ATTATTACTTTTGGTACG	18	1	hsa-miR-126-5p:2-19(1)	6.67576	1.74718	15.5002	0	10.8728	15.926	17.256	9.18772	11.9083	17.9572	43.6398	35.2735	49.4304	36.6259	10.0837	6.22001	0	1.00331	10.0853	0	5.88349	4.76764	8.62541	23.7126	0	16.778	18.9589	20.1491	17.6094	6.30148	6.20879	33.318	22.666	25.4574	33.482	0.817798	10.163	9.66922	5.51323	4.49089	20.5204	36.7991	12.29	7.12455	7.88463
srna2081	ATTATTACTTTTGGTACGC	19	1	hsa-miR-126-5p:2-20(1)	31.7099	13.9775	31.2724	0	8.91572	29.9409	38.1336	26.6127	15.1405	26.6292	92.0499	72.6719	87.708	59.5697	11.3726	5.3023	0	1.33775	9.21773	0	8.53106	6.96809	4.18202	21.0551	0	14.0467	19.7714	25.7075	23.4196	7.25264	12.0295	38.3157	22.3422	29.974	41.1152	2.45339	2.03259	15.4708	12.0867	15.514	48.4355	51.9276	13.6813	8.63167	11.4945
srna10577	TATTATTACTTTTGGTACGCG	21	1	hsa-miR-126-5p:2-21(1)	47.982	0	4.35094	0	0	2.99409	5.60997	0	2.72189	3.32865	3.71026	5.31228	11.0151	6.10432	5.2314	4.18066	0	4.01325	0.108444	0	0	0	0	2.24861	0	0.390186	5.14599	21.5387	12.0673	6.30148	2.03726	15.2707	10.3616	8.41737	17.6952	0	0	0.386769	0	0.204131	3.88224	8.99533	0	0.548042	1.61492
[truncated: 6,513 more rows]
[truncated: 31 more columns]
